# Supplementary material for: Quantitative Phosphoproteomics Reveals the Requirement of DYRK1-Mediated Phosphorylation of Ion Transport- and Cell Junction-Related Proteins for Notochord Lumenogenesis in Ascidian
Source: Cells. 2023 Mar 16;12(6):921. doi: 10.3390/cells12060921 (PMC10047359; doi:10.3390/cells12060921)
Supplement: Supplementary file 1 [file cells-12-00921-s001.zip]

Archive with 6 entries (6 files):
- cells-2131060 supplementary conversion.pdf
- Supplementary Table S1 The tail length of AZ191-treated Ciona embryos.xlsx
- Supplementary Table S2 The A-P cell length of AZ191-treated Ciona notochord cells.xlsx
- Supplementary Table S3 The lumen diameter of AZ191-treated Ciona notochord.xlsx
- Supplementary Table S4 Phosphoproteins in notochord.xlsx
- Supplementary Table S5 Primers used in this study.xlsx
