# Supplementary material for: Quantitative Phosphoproteomics Reveals the Requirement of DYRK1-Mediated Phosphorylation of Ion Transport- and Cell Junction-Related Proteins for Notochord Lumenogenesis in Ascidian
Source: Cells. 2023 Mar 16;12(6):921. doi: 10.3390/cells12060921 (PMC10047359; doi:10.3390/cells12060921)
Supplement: Supplementary file 1 [file cells-12-00921-s001.zip › Supplementary Table S1 The tail length of AZ191-treated Ciona embryos.xlsx]

## Sheet: Sheet1
Tail length (μm)	DMSO			AZ191
	20hpf	22hpf	24hpf	20hpf	22hpf	24hpf
1	469.265	528.052	643.852	292.717	338.368	419.974
2	459.656	575.822	539.812	441.733	394.026	394.35
3	558.085	568.513	419.253	381.525	372.692	438.943
4	486.005	522.218	641.474	374.285	369.791	415.445
5	533.99	545.523	623.327	419.935	362.486	425.039
6	496.762	458.381	482.776	358.888	457.238	371.858
7	585.679	553.849	590.464	411.889	391.859	334.615
8	483.45	491.763	541.099	395.123	465.897	314.549
9	448.248	584.531	507.61	270.69	437.111	369.07
10	448.21	567.147	504.591	368.207	304.596	466.091
11	442.286	445.928	651.927	385.41	337.228	391.429
12	519.525	560.304	687.12	324.229	336.5	349.022
13	509.158	533.471	629.541	346.281	281.256	318.198
14	521.927	607.169	568.802	333.29	387.236	322.472
15	402.211	585.121	628.501	266.749	363.726	379.389
16	451.936	534.858	421.519	363.15	311.805	464.301
17	455.993	553.844	613.873	343.06	379.749	355.284
18	453.264	499.434	488.792	412.31	311.137	423.587
19	467.576	565.304	526.104	399.757	363.629	428.665
20	479.902	606.52	514.701	360.935	318.804	403.847
21	470.077	586.025	542.016	228.899	316.036	497.862
22	453.688	584.447	623.687	411.747	345.407	312.31
23	437.46	556.954	629.413	315.664	331.361	488.888
24	481.814	480.277	520.05	428.882	418.939	328.428
25	391.356	456.63	457.227	387.328	402.361	330.491
26	422.849	550.913	573.734	404.188	400.704	400.161
27	536.294	469.717	520.683	409.69	431.323	417.942
28	513.692	552.83	706.011	340.011	425.523	399.95
29	416.355	528.671	519.047	350.602	334.823	377.588
30	503.882	567.895	524.293	388.1	373.928	422.787
31	462.295	467.368	513.913	457.961	323.072	336.888
32	428.756	568.232	469.681	461.924	414.58	399.454
33	423.544	563.632	634.557	442.578	354.272	361.394
34	551.271	552.738	530.382	453.961	303.988	400.314
35	516.652	523.944	694.716	424.529	321.471	420.873
36	493.05	555.034	530.007	355.206	421.772	371.711
37	507.362	548.302	592.544	256.911	481.505	461.407
38	500.023	603.023	572.094	422.687	374.189	360.603
39	463.497	495.543	537.845	398.522	330.138	414.854
40	478.623	569.412	643.526	304.393	393.488	372.938
41	529.055	487.574	641.615		392.215	384.587
42	508.435	490.464	699		327.808	421.792
43	506.139	578.599	559.12		462.392	357.462
44	511.128	559.985	535.194		389.573	339.392
45	445.897	546.077			354.147	450.516
46	491.927	545.551			444.458	411.67
47	549.042	559.348			369.114	413.797
48	480.33	492.342			432.089	489.51
49	402.177	439.443			369.521	553.038
50	350.89	413.335			382.156	395.755
51					305.729	399.534
52					373.311	440.936
53						353.603
54						424.308
55						398.321
56						343.755
57						409.529
58						435.726
59						412.999
60						401.874
61						383.362
