# Supplementary material for: Quantitative Phosphoproteomics Reveals the Requirement of DYRK1-Mediated Phosphorylation of Ion Transport- and Cell Junction-Related Proteins for Notochord Lumenogenesis in Ascidian
Source: Cells. 2023 Mar 16;12(6):921. doi: 10.3390/cells12060921 (PMC10047359; doi:10.3390/cells12060921)
Supplement: Supplementary file 1 [file cells-12-00921-s001.zip › Supplementary Table S2 The A-P cell length of AZ191-treated Ciona notochord cells.xlsx]

## Sheet: Sheet1
A-P cell length (μm)	DMSO			AZ191
	20hpf	22hpf	24hpf	20hpf	22hpf	24hpf
1	10.413	15.966	18.885	10.054	12.037	11.186
2	12.374	13.938	20.1	10.612	11.799	11.831
3	11.397	13.207	20.621	10.769	12.189	12.925
4	12.752	12.831	15.488	11.295	9.151	10.582
5	10.827	16.755	17.768	10.212	10.387	11.551
6	11.441	17.415	17.541	9.34	9.693	12.199
7	12.441	12.111	19.802	9.814	12.785	14.01
8	12.417	13.896	24.345	10.411	13.175	11.035
9	13.966	12.917	12.412	10.212	11.541	11.641
10	13.333	14.9	13.534	8.823	10.122	11.312
11	10.754	13.5	24.146	9.557	11.563	12.785
12	12.154	16.694	27.878	11.228	11.515	11.907
13	16.025	12.168	23.982	10.699	13.512	10.492
14	13.93	13.986	21.378	12.069	12.168	14.051
15	15.721	14.524	22.175	9.999	10.363	16.442
16	15.01	13.733	22.481	10.934	8.427	13.218
17	15.737	14.89	21.305	10.933	17.774	15.237
18	15.499	19.78	22.19	11.142	10.653	12.791
19	13.379	14.254	21.155	8.192	12.873	15.111
20	14.418	14.502	25.649	10.379	12.494	14.894
21	16.124	13.825	25.277	11.34	11.245	15.06
22	11.955	12.38	21.625	12.586	12.686	12.414
23	15.157	16.478	23.852	12.119	12.88	13.396
24	13.816	13.061	19.961	11.551	11.791	7.354
25	12.923	15.637	21.364	9.767	9.071	8.94
26	14.051	13.271	19.046	9.338	9.332	14.245
27	13.806	17.605	22.81	13.655	11.177	9.098
28	12.694	18.454	20.382	8.167	10.612	7.88
29	15.188	15.626	24.693	8.8	9.58	13.732
30	15.231	14.211	21.383	12.287	11.606	18.743
31	13.208	14.267	24.112	11.702	12.799	14.509
32	13.208	14.211	18.261	8.662	10.831	12.721
33	12.151	13.825	19.945	8.299	10.02	13.516
34	16.199	18.963	22.297	9.242	13.145	18.349
35	12.463	15.196	18.758	9.152	14.702	14.639
36	11.468	14.464	18.313	9.999	14.055	17.091
37	14.051	17.695	26.308	10.846	13.324	15.017
38	14.408	17.013	21.823	12.287	12.533	15.737
39	10.945	15.632	22.019	13.17	14.598	13.641
40	13.932	17.706	21.2	9.236	14.858	13.06
41	12.649	18.248	22.062	11.069	11.343	14.464
42	13.311	17.077	22.416	11.71	10.122	12.375
43	11.66	20.369	22.481	12.447	14.261	15.163
44	14.732	19.018	21.527	9.888	9.603	13.783
45	10.157	18.377	22.687	12.943	9.975	14.074
46	11.57	19.062	19.142	12.391	10.391	12.81
47	12.777	18.277	20.35	11.17	10.848	22.323
48	15.401	18.358	21.397	11.922	13.71	18.295
49	12.974	15.194	22.968	12.673	12.533	12.324
50	14.647	17.676	21.271	9.306	10.307	7.789
51	12.586	15.13	21.115	9.115	12.435	11.831
52	12.154	17.193	21.866	10.06	15.632	10.154
53	12.308	14.888	17.177	11.889	14.207	9.514
54	15.726	15.183	20.967	9.942	11.952	9.03
55	11.429	15.587	19.146	9.753	13.317	13.599
56	15.802	13.395	18.879	8.742	10.484	13.084
57	16.41	16.201	17.822	10.73	10.155	10.891
58	14.356	14.293	21.449	9.338	12.437	11.352
59	16.32	16.158		10.14	9.926	12.973
60	13.481	15.244		11.128	11.488	7.792
61	15.51	14.016		9.743	10.949	13.719
62	14.163	15.687		10.532	12.52	16.729
63	12.358	13.72		11.764	11.124	14.394
64	13.563	16.662		10.256	13.588	12.028
65	12.544	16.43		12.358	9.678	11.857
66	15.13	18.483		11.239	10.142	12.371
67	13.744	10.745		9.346	12.513	10.308
68	16.637	14.709		11.764	13.616	8.213
69	12.935	14.207		11.17	16.75	13.023
70	10.945	16.148		10.649	10.421	12.51
71	13.936			9.735	11.575	9.975
72	15.522			9.372	9.562	10.115
73	11.35				10.421	12.453
74	14.937				11.731	11.19
75	13.532				9.537	12.546
76						9.802
77						10.619
78						12.013
79						12.08
80						15.017
81						9.735
82						12.358
83						9.445
