# Supplementary material for: Quantitative Phosphoproteomics Reveals the Requirement of DYRK1-Mediated Phosphorylation of Ion Transport- and Cell Junction-Related Proteins for Notochord Lumenogenesis in Ascidian
Source: Cells. 2023 Mar 16;12(6):921. doi: 10.3390/cells12060921 (PMC10047359; doi:10.3390/cells12060921)
Supplement: Supplementary file 1 [file cells-12-00921-s001.zip › Supplementary Table S3 The lumen diameter of AZ191-treated Ciona notochord.xlsx]

## Sheet: Sheet1
Lumen diameter (μm）	DMSO			AZ191
	20hpf	22hpf	24hpf	20hpf	22hpf	24hpf
1	4.891	14.266	7.861	3.277	3.683	7.125
2	5.797	14.186	17.25	1.832	3.093	6.807
3	4.383	11.223	14.285	2.417	3.526	6.497
4	3.901	7.49	12.189	2.026	3.824	6.591
5	5.827	9.091	12.04	1.788	4.252	3.823
6	4.468	6.653	16.031	2.074	3.016	7.125
7	7.763	8.707	16.295	1.638	5.049	5.299
8	5.957	8.8	11.65	2.074	6.591	8.396
9	5.701	11.106	14.696	1.589	7.2	8.022
10	8.063	8.952	14.015	1.257	5.773	5.464
11	6.642	11.276	12.9	2.221	4.082	4.198
12	7.369	7.669	13.21	1.874	7.262	8.777
13	5.11	10.491	12.047	2.265	6.148	7.604
14	6.167	11.266	10.542	1.885	4.383	7.562
15	4.082	11.027	12.469	2.221	6.874	3.98
16	5.273	9.969	10.761	2.149	4.572	8.991
17	7.001	12.678	9.831	2.317	5.273	10.909
18	6.514	8.488	12.158	1.697	4.64	4.975
19	7.303	8.026	16.388	2.265	2.944	5.074
20	10.999	7.671	17.503	2.317	6.414	6.092
21	4.636	12.02	9.391	2.489	6.744	6.198
22	5.198	10.396	13.448	3.033	5.228	8.277
23	6.874	9.189	10.345	3.33	6.386	5.34
24	4.724	11.079	9.831	2.613	5.072	4.73
25	4.998	11.611	16.335	3.185	4.135	4.296
26	8.699	9.867	18.416	1.333	5.013	6.871
27	8.319	12.238	11.096	1.874	6.591	5.604
28	6.151	11.143	13.19	1.638	4.789	6.482
29	6.819	12.519	15.287	1.832	4.177	3.828
30	9.679	7.838	19.051	1.405	4.572	7.103
31	8.236	9.504	16.532	1.987	3.824	6.246
32	11.883	11.962	10.542	1.967	5.797	4.793
33	7.329	11.888	11.175	1.589	4.986	8.466
34	6.293	14.806	16.92	1.589	5.743	8.548
35	5.448	10.845	11.341	2.026	6.657	4.809
36	6.34	11.46	13.063	2.185	6.639	3.95
37	6.928	12.72	12.404	1.832	5.273	6.408
38	5.632	11.084	13.338	2.045	5.907	5.34
39	6.486	11.563	11.725	3.039	7.098	4.287
40	4.082	6.859	13.884	2.954	6.167	7.033
41	8.165	9.47	14.345	2.401	5.523	7.617
42	6.84	12.771	15.724	1.513	4.077	4.915
43	7.457	10.533	15.858	1.967	7.001	7.478
44	5.243	7.575	17.981	2.265	3.407	4.305
45	6.773	9.776	12.712	2.583	2.835	5.692
46	7.579	9.767	17.954	1.602	6.215	4.793
47	8.895	8.393	15.724	1.589	5.01	7.366
48	10.773	9.967	13.806	2.185	4.661	7.578
49	7.59	8.382	12.477	2.026	2.758	4.472
50	13.238	9.897	13.755	3.007	4.623	6.672
51	7.579	8.791	16.446	2.137	6.036	9.627
52	7.644	8.571	12.871	1.85	3.464	5.435
53	8.794	9.422	17.615	1.66	6.045	4.858
54	4.769	10.83	13.867	1.515	4.343	9.779
55	6.562	8.026	13.478	1.287	4.95	9.558
56	5.243	12.672	15.794	2.411	2.582	3.971
57	9.526	9.189	13.558	3.454	2.481	4.021
58	5.608	11.364	14.757	3.578	5.957	4.928
59	5.944	11.977		2.666	6.1	4.764
60	5.712	11.364		1.912	3.224	7.272
61	12.24	15.473		3.023	3.845	6.833
62	5.827	10.344		3.418	2.944	6.224
63	3.168	8.926		3.278	3.845	7.182
64	4.082	15.993		1.771	3.023	6.35
65	3.168	8.195			6.045	5.65
66	5.141	10.55			4.891	4.729
67	3.845	9.897			6.441	8.581
68	3.757	10.963			4.891	3.613
69	3.526	9.915			5.262
70	4.374	11.143			3.89
71	5.448	9.215			5.183
72	5.183	10.595			5.756
73	6.736	10.52			2.758
74	9.751	10.61			3.08
75	8.312	7.256			3.193
76	6.759	7.31			4.903
77	8.517	9.189			3.783
78	8.329	8.462			5.11
79	10.194	6.804			6.874
80	8.253	9.178			6.29
81	8.141	8.308			4.661
82	6.293	9.32			5.632
83	5.576	8.317			3.708
84	6.218	7.4			3.389
85	7.227	5.784			3.35
86	6.582	8.212			3.87
87	5.06	7.386			7.053
88	6.618	8.182			6.076
89	5.11	10.854			5.349
90	4.284	9.578			3.676
91	4.785	7.906			6.256
92	3.296	10.288			4.012
93	5.756	7.49			3.441
94	7.153	9.025			4.39
95	4.397	9.36			5.805
96	4.966	9.275			7.201
97	4.428	8.959			7.079
98	5.987	8.773			4.792
99	5.629	9.337			4.261
100	4.284	8.182			2.674
