# Supplementary material for: Quantitative Phosphoproteomics Reveals the Requirement of DYRK1-Mediated Phosphorylation of Ion Transport- and Cell Junction-Related Proteins for Notochord Lumenogenesis in Ascidian
Source: Cells. 2023 Mar 16;12(6):921. doi: 10.3390/cells12060921 (PMC10047359; doi:10.3390/cells12060921)
Supplement: Supplementary file 1 [file cells-12-00921-s001.zip › Supplementary Table S4 Phosphoproteins in notochord.xlsx]

## Sheet: Sheet1
Protein.Site	Sequence.Window	Protein.1	Peptide	Best.Localized.Probability	C.1.Localized.Probability	C.2.Localized.Probability	C.3.Localized.Probability	In.1.Localized.Probability	In.2.Localized.Probability	In.3.Localized.Probability	C.1.Intensity	C.2.Intensity	C.3.Intensity	In.1.Intensity	In.2.Intensity	In.3.Intensity
evm.model.Chr1.1003_S1195	QREYQIPSTSSLPKVASVGEG	evm.model.Chr1.1003	EYQIPSTSsLPK	0.906	0	0	0	0	0.906	0	0	0	102519	0	33732.7	59002.9
evm.model.Chr1.1003_S1912	WLSYIPSTRNSPLPIIEAKDS	evm.model.Chr1.1003	NsPLPIIEAK	1	1	0	1	0	0	0	0	0	36095.7	0	0	0
evm.model.Chr1.1003_S33	SDTDEEPKVASEDDITPRNQE	evm.model.Chr1.1003	VAsEDDITPR	0.974	0.969	0.971	0.968	0.974	0.973	0.973	457041	438504	402171	625840	496708	769187
evm.model.Chr1.1003_S56	EKNASLPTTSSSNTSLSGVNK	evm.model.Chr1.1003	NASLPTTSsSNTsLSGVNK	0.753	0	0	0.753	0	0.429	0	0	0	249957	0	218666	0
evm.model.Chr1.1003_S57	KNASLPTTSSSNTSLSGVNKN	evm.model.Chr1.1003	NASLPTTSSsNTSLSGVNK;NASLPTTSSsNTsLSGVNK	0.958	0.555	0.945	0.636	0.796	0.955	0.958	598514	574004	698307	312282	461561	681392
evm.model.Chr1.1003_S60	SLPTTSSSNTSLSGVNKNPMR	evm.model.Chr1.1003	NASLPTTSSSNTsLSGVNK;NASLPTTSSSNtsLSGVNK;NASLPTTSSsNTsLSGVNK;NASLPTTSsSNTsLSGVNK	0.969	0.961	0.929	0.832	0.802	0.969	0.957	534483	357372	633784	141523	674215	291249
evm.model.Chr1.1003_T59	ASLPTTSSSNTSLSGVNKNPM	evm.model.Chr1.1003	NASLPTTSSSNtSLSGVNK;NASLPTTSSSNtsLSGVNK	0.953	0.647	0	0	0	0.953	0.77	554483	385574	0	0	510682	180311
evm.model.Chr1.1003_T651	VNSLERGQVLTPTSLRTSEIV	evm.model.Chr1.1003	GQVLtPTSLR	0.968	0.968	0.967	0.956	0	0.967	0.966	22648.9	34919.3	26079.7	22395.9	34164	33726.8
evm.model.Chr1.1005_S548	RFLRKITIGQSPTEKGRERVA	evm.model.Chr1.1005	ITIGQsPTEK;KITIGQsPTEK	0.966	0.96	0.965	0.964	0.936	0.966	0.964	147021	124114	135315	129912	100268	188656
evm.model.Chr1.1006_S120	NNAGDLRRAASIDLLNRDNKR	evm.model.Chr1.1006	AAsIDLLNR;RAAsIDLLNR	1	1	1	1	1	1	1	3.50382e+06	3.61841e+06	4271331	4.09904e+06	4.37526e+06	5.07721e+06
evm.model.Chr1.1006_S85	PLPSRPNVDNSPKSRVRPPSP	evm.model.Chr1.1006	NAFQPLPSRPNVDNsPK	0.969	0.969	0.969	0.967	0	0.96	0	371872	262586	450946	13797.1	53455	128178
evm.model.Chr1.1006_S94	NSPKSRVRPPSPGGRRRAPTT	evm.model.Chr1.1006	VRPPsPGGR	1	1	1	1	1	1	1	7.4881e+06	7144088	6.74597e+06	7.40529e+06	7561496	7.20673e+06
evm.model.Chr1.1010_S126	KEKATKQGKPSPPKPTKSETP	evm.model.Chr1.1010	QGKPsPPKPTK	0.973	0.97	0.971	0.967	0.968	0.973	0.972	3685664	3.60971e+06	3.53382e+06	2.35328e+06	2.84773e+06	2.30599e+06
evm.model.Chr1.1010_S208	DAQKPRQHKVSFSEDFKSGDA	evm.model.Chr1.1010	QHKVsFSEDFK;VsFSEDFK	0.973	0.97	0.971	0.965	0.973	0.973	0.973	929033	702198	1.22861e+06	651101	952256	767113
evm.model.Chr1.1010_S267	LVEMLNQRLQSANGDWATAGT	evm.model.Chr1.1010	LQsANGDWATAGTGISK	0.968	0.968	0	0.966	0	0	0	17920.7	14443	49973.1	0	0	0
evm.model.Chr1.1010_S514	QRAVLESEYGSLAETKQALED	evm.model.Chr1.1010	AVLESEYGsLAETK	0.962	0.96	0.962	0.491	0	0	0	16760.7	17500.5	34374.1	0	0	0
evm.model.Chr1.1010_S577	EFSKYKEANKSDNEAHLQQTK	evm.model.Chr1.1010	EANKsDNEAHLQQTK	0.964	0	0	0.964	0	0	0	11053	16028.2	20062.3	0	0	0
evm.model.Chr1.1010_S828	VAETQSQLNTSVQKCEELETS	evm.model.Chr1.1010	VAETQSQLNTsVQK	0.97	0.969	0.969	0.965	0.964	0.96	0.97	216102	238409	212470	319318	207795	256772
evm.model.Chr1.1010_S864	VASGTDSRDTSSPIPVLHKDV	evm.model.Chr1.1010	DTsSPIPVLHK	0.933	0.694	0	0.933	0.494	0.492	0.494	72042.1	192854	93039.3	140693	9049733	164227
evm.model.Chr1.1010_S865	ASGTDSRDTSSPIPVLHKDVE	evm.model.Chr1.1010	DTSsPIPVLHK;DtSsPIPVLHK	0.973	0.969	0.961	0.967	0.973	0.966	0.965	13600000	13400000	12700000	13600000	14500000	15200000
evm.model.Chr1.1010_T863	DVASGTDSRDTSSPIPVLHKD	evm.model.Chr1.1010	DtSSPIPVLHK;DtSsPIPVLHK	0.965	0.965	0.956	0.954	0.938	0.941	0.961	294921	473295	238937	184758	388409	278117
evm.model.Chr1.1011_S108	RGGYGYGGGYSPIGDNSASAK	evm.model.Chr1.1011	GGYGYGGGYsPIGDNSASAK	0.964	0.964	0	0.964	0	0	0	54490.9	48274.7	60143.8	0	0	35463.6
evm.model.Chr1.1068_S1039	VRFYSPNKTASETDQHTTESP	evm.model.Chr1.1068	TAsETDQHTTESPR	0.96	0.931	0.652	0.955	0	0.96	0	29589.1	33897.5	26502.6	0	11547.2	0
evm.model.Chr1.1068_S1048	ASETDQHTTESPRVAPTDGED	evm.model.Chr1.1068	TASETDQHTTEsPR	0.963	0.963	0.958	0.959	0	0.952	0	19851.5	28590.9	17702.2	0	0	0
evm.model.Chr1.1068_S35	DVGEKLTLINSDEDKVLTTDT	evm.model.Chr1.1068	LTLINsDEDK	0.972	0.969	0.97	0.954	0.972	0.901	0.964	188332	197038	190205	208309	206602	219370
evm.model.Chr1.1068_T995	SDISAYTYERTLMMEQRTQIL	evm.model.Chr1.1068	tLMMEQR	1	0	0	0	1	1	0	36760.6	17607.4	47547.7	31866.2	33408.4	37939.9
evm.model.Chr1.1069_S42	CSSKMSSKHQSASSDVDPKGA	evm.model.Chr1.1069	HQsASSDVDPK	0.942	0	0.903	0.942	0	0.895	0	0	20582.5	25071.2	0	36387.8	0
evm.model.Chr1.1070_S515	KGKRHAEADGSEEAADIKWCE	evm.model.Chr1.1070	HAEADGsEEAADIK	1	0	0	1	0	0	0	0	0	21967.8	0	0	0
evm.model.Chr1.1077_S919	KMTRLKIDEVSIKSDSEDSQI	evm.model.Chr1.1077	IDEVsIKSDSEDSQISSVTDDSR	0.964	0.964	0	0.778	0	0	0	0	0	49473.8	0	0	0
evm.model.Chr1.1077_S922	RLKIDEVSIKSDSEDSQISSV	evm.model.Chr1.1077	sDSEDSQISSVTDDSR	0.963	0.941	0.953	0.963	0.447	0.482	0.485	54221.7	54260.2	51986.3	27800.5	48888.1	27464.2
evm.model.Chr1.1077_S924	KIDEVSIKSDSEDSQISSVTD	evm.model.Chr1.1077	SDsEDsQISSVTDDSR	0.914	0	0	0.914	0	0	0	0	0	20861.8	0	0	0
evm.model.Chr1.1077_S927	EVSIKSDSEDSQISSVTDDSR	evm.model.Chr1.1077	SDSEDsQISSVTDDSR;SDsEDsQISSVTDDSR	0.95	0.95	0.944	0.916	0	0.915	0	17752.8	24205.9	44094.5	0	19748.6	0
evm.model.Chr1.1077_S931	KSDSEDSQISSVTDDSRSSQT	evm.model.Chr1.1077	SDSEDSQISsVTDDSR	0.952	0	0.952	0	0	0	0	0	20080.7	0	0	0	0
evm.model.Chr1.1092_T114	KQHIDTIAPPTPTTTDPKTAL	evm.model.Chr1.1092	QHIDTIAPPtPTTTDPK	0.965	0.965	0	0	0	0	0	146465	89693.7	134620	0	0	97238.6
evm.model.Chr1.1102_S1225	STLRLLRTFNSVDSINSRLDA	evm.model.Chr1.1102	TFNsVDSINSR	0.959	0.955	0	0	0.959	0.935	0.641	20778.2	0	0	18210.2	21770.8	18672.9
evm.model.Chr1.1102_S841	AQKMADSLLGSNAKLRSPSSV	evm.model.Chr1.1102	MADSLLGsNAK	0.971	0.967	0	0	0.97	0.971	0.971	80270.6	50034.3	43774.2	93929.3	91623	81395.8
evm.model.Chr1.1102_S847	SLLGSNAKLRSPSSVKRDRIY	evm.model.Chr1.1102	LRsPSSVK	0.97	0.968	0.955	0	0	0.969	0.97	58689.3	51983.5	61868.3	79506.8	85006.8	82664.9
evm.model.Chr1.1102_S894	HRSCKSAENLSPNRKRYDKVR	evm.model.Chr1.1102	SAENLsPNR;SAENLsPNRK	0.968	0.965	0.965	0.955	0.958	0.968	0.96	151184	112246	95481.4	145513	162580	136587
evm.model.Chr1.1124_S475	GPKPSPNSSLSPRSGSANSLP	evm.model.Chr1.1124	PSPNSSLsPR	0.964	0.964	0.962	0.961	0.91	0.963	0.964	341861	293910	243035	373142	328988	342305
evm.model.Chr1.1124_S552	TKNSPHPGNQSPHNSTGSDYD	evm.model.Chr1.1124	NSPHPGNQsPHNSTGSDYDNSGPPGGGAEQTGSK	0.951	0	0.951	0	0	0	0	0	168289	169115	0	0	0
evm.model.Chr1.1124_S613	NNNHSTEKSESPPALQEPTQH	evm.model.Chr1.1124	SEsPPALQEPTQHK;SEsPPALQEPTQHKPGSLPK	0.968	0.959	0.965	0.968	0.965	0.966	0.966	933749	969607	1.34051e+06	326317	407959	448173
evm.model.Chr1.1124_S755	LSVDTSQDTNS**********	evm.model.Chr1.1124	LLSVDTSQDTNs	0.962	0.962	0	0.952	0	0	0	24048.7	0	17243.7	0	0	0
evm.model.Chr1.1126_S231	KGDRFTLRKGSSTIGTGIVTE	evm.model.Chr1.1126	KGsSTIGTGIVTEAQSADK	0.955	0	0	0.955	0	0	0	0	0	158806	0	0	0
evm.model.Chr1.1136_S231	SKKKSVRMQQSDDDVSSSVPT	evm.model.Chr1.1136	MQQsDDDVSSSVPTTR	0.973	0.969	0.968	0.968	0.973	0.971	0.971	624878	619000	596414	404212	422664	454522
evm.model.Chr1.1136_S96	GGKKNKQRTPSPIMIKTSTNE	evm.model.Chr1.1136	QRtPsPIMIK;TPsPIMIK	1	1	1	1	1	1	0.952	1.07393e+06	772034	1.01445e+06	989811	991745	1069054
evm.model.Chr1.1136_T94	PMGGKKNKQRTPSPIMIKTST	evm.model.Chr1.1136	QRtPSPIMIK;QRtPsPIMIK	1	1	1	1	1	1	0	996766	675484	927030	766686	896902	920940
evm.model.Chr1.1147_S276	RPGESRKRTQSITSSDNTPKR	evm.model.Chr1.1147	TQsITSSDNTPK	0.972	0.969	0.964	0.95	0.97	0.972	0.972	150556	141584	122615	179563	192405	156806
evm.model.Chr1.1147_S467	NTEFPYKEERSPSVSPTEEVK	evm.model.Chr1.1147	EERsPSVSPTEEVK;EERsPsVsPTEEVK;sPSVsPTEEVK;sPsVSPTEEVK;sPsVsPTEEVK	0.968	0.963	0.968	0.963	0.621	0.939	0.96	18881.1	96968	245099	100875	123808	186520
evm.model.Chr1.1147_S469	EFPYKEERSPSVSPTEEVKGK	evm.model.Chr1.1147	EERsPsVsPTEEVK;SPsVSPTEEVK;SPsVsPTEEVK;sPsVSPTEEVK;sPsVsPTEEVK	0.968	0	0.968	0.963	0.928	0.794	0.502	200328	354783	234145	402659	103854	267711
evm.model.Chr1.1147_S471	PYKEERSPSVSPTEEVKGKEE	evm.model.Chr1.1147	EERsPsVsPTEEVK;SPsVsPTEEVK;sPSVsPTEEVK;sPsVsPTEEVK	0.963	0	0.944	0.963	0.929	0.941	0.96	137583	188444	340088	236609	123808	186520
evm.model.Chr1.1147_T283	RTQSITSSDNTPKRSRALSPL	evm.model.Chr1.1147	TQSITSSDNtPKR	0.962	0.962	0	0	0	0	0.79	15324.3	0	0	0	0	0
evm.model.Chr1.114_S533	FQAPTGDELPSKGFDPGEDTY	evm.model.Chr1.114	FQAPTGDELPsK	0.953	0.953	0	0	0	0	0	17878.2	0	18509	0	0	0
evm.model.Chr1.114_Y639	NSIKNRLTGEYGAVPDVARHY	evm.model.Chr1.114	LTGEyGAVPDVAR	0.966	0.966	0	0	0	0	0	33609.7	0	0	0	26681.5	34595.6
evm.model.Chr1.1151_S122	TVKVIGGDDLSNLRDKNVLIV	evm.model.Chr1.1151	VIGGDDLsNLR	1	1	0	1	0	0	0	0	0	38161.6	0	0	0
evm.model.Chr1.1156.1_S110	SMKPKAEKRRSDGEAIEKLKK	evm.model.Chr1.1156.1	RRsDGEAIEK	1	1	1	1	1	1	1	91079.9	150441	144638	103505	131698	61686.2
evm.model.Chr1.1156.1_S157	SKQEIKQEMESPTKGKKVKKE	evm.model.Chr1.1156.1	QEMEsPTK	0.972	0.955	0.968	0.966	0.972	0.961	0.967	98613.3	100376	86757.9	93140.8	137488	97795.1
evm.model.Chr1.1158_S213	FERKDNEITGSPFRCLISPTF	evm.model.Chr1.1158	DNEITGsPFR;KDNEITGsPFR	0.966	0	0.966	0.964	0	0	0	53747.9	53899.4	41763.7	0	0	0
evm.model.Chr1.1168_S192	FYKDKQLEKMSQEDFWAEKEG	evm.model.Chr1.1168	MsQEDFWAEK	1	1	0	0	0	0	0	9389.31	0	17947.2	0	0	0
evm.model.Chr1.1168_S82	TILAALKESKSGLMETDIENQ	evm.model.Chr1.1168	sGLMETDIENQSIR	0.924	0	0	0.924	0	0	0	0	0	15763.1	0	0	0
evm.model.Chr1.1168_S93	GLMETDIENQSIRRKPSRPVP	evm.model.Chr1.1168	SGLMETDIENQsIR	0.973	0.967	0.967	0.967	0.973	0.973	0.964	127784	119370	204352	51118	84823.1	106959
evm.model.Chr1.1169_S486	FTEFKAPQAVSPPSQHKTHSR	evm.model.Chr1.1169	APQAVsPPSQHK	0.973	0.969	0.969	0.968	0.971	0.973	0.972	1590980	1.44652e+06	1.30187e+06	1.22489e+06	1.20466e+06	1.17171e+06
evm.model.Chr1.1169_S499	SQHKTHSRTSSTDYNLSDSSS	evm.model.Chr1.1169	TSsTDYNLSDSSSGTGAVQSPAGK	0.938	0.476	0	0.474	0.938	0	0	205132	0	265907	128167	0	156776
evm.model.Chr1.1169_S505	SRTSSTDYNLSDSSSGTGAVQ	evm.model.Chr1.1169	TSSTDYNLsDSSSGTGAVQSPAGK	0.866	0.79	0.866	0.245	0	0	0	73755.2	77271.8	95855	0	0	0
evm.model.Chr1.1171_S190	DDDDGRRSSRSWESPSPSIRR	evm.model.Chr1.1171	sWESPSPSIR	0.967	0	0	0.967	0	0	0	0	0	14102.4	0	0	0
evm.model.Chr1.1171_S193	DGRRSSRSWESPSPSIRRGDT	evm.model.Chr1.1171	SWEsPSPSIR;SWEsPsPSIR	0.969	0.896	0.969	0.958	0	0.954	0	61856.1	56538.2	101501	0	62163.2	55142.9
evm.model.Chr1.1171_S195	RRSSRSWESPSPSIRRGDTPG	evm.model.Chr1.1171	SWESPsPSIR;SWEsPsPSIR	0.968	0.965	0.964	0.954	0.968	0	0	90402.1	91880.9	131446	80653.1	0	109874
evm.model.Chr1.1171_S197	SSRSWESPSPSIRRGDTPGSR	evm.model.Chr1.1171	SWESPSPsIR	0.966	0	0	0	0	0.583	0.966	91090.1	92658.7	0	0	106144	109773
evm.model.Chr1.1171_S5	******MNTISPESSIHRLEG	evm.model.Chr1.1171	MNTIsPESSIHR	0.971	0.966	0.97	0.961	0.97	0.971	0.97	256675	243829	231895	87236.6	158347	188172
evm.model.Chr1.1176_S4	*******MVTSMDEDQAWEDV	evm.model.Chr1.1176	VTsMDEDQAWEDVKPR	0.965	0	0	0.965	0	0	0	546245	243777	1.17534e+06	0	0	0
evm.model.Chr1.1177_S444	TLLKLISGELSPTDGIIRRHS	evm.model.Chr1.1177	LISGELsPTDGIIR	0.95	0	0	0.95	0	0	0	0	0	43501.7	0	0	0
evm.model.Chr1.1177_S62	LKTIVITDGSSDKEARSCTGV	evm.model.Chr1.1177	TIVITDGSsDKEAR	0.951	0	0	0.951	0	0	0	0	15075.4	15440.2	0	0	0
evm.model.Chr1.118_S413	NIRLREEDNRSDVNTLISSVD	evm.model.Chr1.118	sDVNTLISSVDSR	0.967	0.967	0	0	0	0	0	8242.4	0	70106	0	0	0
evm.model.Chr1.118_S421	NRSDVNTLISSVDSREFNPKD	evm.model.Chr1.118	SDVNTLISsVDSR;SDVNTLISsVDsR	0.967	0.967	0	0	0	0	0	173217	178127	357976	0	0	0
evm.model.Chr1.118_S424	DVNTLISSVDSREFNPKDKGG	evm.model.Chr1.118	SDVNTLISsVDsR	0.967	0.967	0	0	0	0	0	138566	178127	292359	0	0	0
evm.model.Chr1.1193_S515	SKKDKDFYDDSSDEEQDDDAT	evm.model.Chr1.1193	DFYDDssDEEQDDDATK;DKDFYDDsSDEEQDDDATK;DKDFYDDssDEEQDDDATK;KDKDFYDDssDEEQDDDATK	0.963	0.962	0.961	0.963	0	0	0.488	144322	594520	890580	0	89901.1	97159.7
evm.model.Chr1.1193_S516	KKDKDFYDDSSDEEQDDDATK	evm.model.Chr1.1193	DFYDDssDEEQDDDATK;DKDFYDDssDEEQDDDATK;KDKDFYDDssDEEQDDDATK	0.963	0	0.961	0.963	0	0	0	0	454302	797527	0	0	0
evm.model.Chr1.1193_Y512	RIKSKKDKDFYDDSSDEEQDD	evm.model.Chr1.1193	DKDFyDDSSDEEQDDDATK	0.968	0.878	0.331	0.415	0	0.968	0	52932	139604	80794.5	0	45549.5	0
evm.model.Chr1.1194_S247	GVRQGNYKYKSGTTDVLSKVV	evm.model.Chr1.1194	YKsGTTDVLSK	0.965	0.945	0.935	0.951	0.909	0.965	0.965	36889.4	30765.6	32779	44764.9	43099	48399.8
evm.model.Chr1.1218_S816	YQAQAYGRPGSPDFGSYHDQY	evm.model.Chr1.1218	PGsPDFGSYHDQY	0.971	0.956	0	0.966	0.946	0.971	0.97	146421	174830	178845	68667	133131	146653
evm.model.Chr1.123_S423	VTQATRLTEDSEDEMVSYERD	evm.model.Chr1.123	LTEDsEDEMVSYER;LtEDsEDEMVSYER	0.971	0	0	0	0.971	0	0	2.4894e+06	2.37795e+06	3043222	1022787	1.17168e+06	1240020
evm.model.Chr1.123_T420	ESNVTQATRLTEDSEDEMVSY	evm.model.Chr1.123	LtEDsEDEMVSYER	0.97	0	0	0	0.97	0	0	0	0	88666.5	31658.9	0	0
evm.model.Chr1.123_T435	DEMVSYERDTTDEREVLV***	evm.model.Chr1.123	DTtDEREVLV	0.922	0	0	0	0.922	0	0	34482.7	33697.5	44054.1	34004.9	0	0
evm.model.Chr1.1240_S1169	RTSRQLKRLESISRSPIYSHF	evm.model.Chr1.1240	RLEsISR	0.963	0.963	0	0	0	0	0	26843	29107.8	32746.5	32162.1	0	0
evm.model.Chr1.1240_T953	CKSGKLRRRKTDRDIDIKAQQ	evm.model.Chr1.1240	KtDRDIDIK	1	0	0	1	0	0	0	0	0	21457.2	0	0	0
evm.model.Chr1.1240_T973	QKKKDDKLITTETAETGNIKL	evm.model.Chr1.1240	LITtETAETGNIK	0.958	0.528	0.938	0.958	0	0	0	20472.5	16410.2	21842.9	0	0	0
evm.model.Chr1.1246_S472	ASGLDKHGVDSASPLKYTHID	evm.model.Chr1.1246	HGVDsASPLK	0.88	0.5	0	0.88	0.5	0	0.5	99186.1	104702	98942.1	0	86885.7	70849.3
evm.model.Chr1.1246_S474	GLDKHGVDSASPLKYTHIDMA	evm.model.Chr1.1246	HGVDSAsPLK	0.965	0	0.965	0	0	0.961	0	99186.1	104702	92931.3	0	80076.7	0
evm.model.Chr1.1281_S451	STQMRRDRPGSRDDARNYSSN	evm.model.Chr1.1281	DRPGsRDDAR	1	0	1	0	1	0	0	0	0	0	32126.9	0	0
evm.model.Chr1.1281_S8	***MVMMEKPSPIQVGREFVR	evm.model.Chr1.1281	VMMEKPsPIQVGR	1	0	1	0	0	0	0	46746.6	40612.8	74870.7	0	0	0
evm.model.Chr1.1281_T145	QDEVFLDESSTERVEEEQAAV	evm.model.Chr1.1281	YQDEVFLDESStER	0.952	0.952	0	0	0	0	0	101495	67017.5	0	0	0	0
evm.model.Chr1.1284_S1049	SGHVVGRVALSPSRNVVSPRG	evm.model.Chr1.1284	VALsPSR	0.97	0.966	0.969	0	0.97	0	0.968	38681.5	34926	34538	62785.3	67399.5	50346.2
evm.model.Chr1.1284_S1060	PSRNVVSPRGSVGTIDLMSPR	evm.model.Chr1.1284	GsVGTIDLMSPR	0.968	0.966	0.965	0.967	0	0	0.968	29454.9	38311.9	36219.7	0	0	34894.2
evm.model.Chr1.1284_S1068	RGSVGTIDLMSPRGSVNVDTE	evm.model.Chr1.1284	GSVGTIDLMsPR	0.972	0.949	0.961	0.966	0.972	0.97	0.963	177127	152771	246291	71868.2	108913	136212
evm.model.Chr1.1284_S1103	TASIQKLRMDSSADISDAISN	evm.model.Chr1.1284	MDsSADISDAISNK	0.965	0.965	0.958	0.949	0	0.958	0.959	24772.7	17219.8	20141.5	0	0	21916.1
evm.model.Chr1.1284_S1115	ADISDAISNKSQSPGIGASPL	evm.model.Chr1.1284	sQSPGIGASPLFNR	0.94	0	0.94	0	0	0	0	28025.4	24927.2	0	0	13874.9	21649.6
evm.model.Chr1.1284_S1117	ISDAISNKSQSPGIGASPLFN	evm.model.Chr1.1284	SQsPGIGASPLFNR	0.969	0.964	0	0.952	0	0.969	0.933	30090.1	21506.2	33326	0	23699.4	29442.6
evm.model.Chr1.1284_S1162	YNPNTYSEQLSPFHKGDLKDA	evm.model.Chr1.1284	YNPNTYSEQLsPFHK	0.966	0.962	0	0.966	0	0	0	42810.8	0	64733.7	0	0	0
evm.model.Chr1.1284_S617	SGTPNGRFIRSRSDIDPASAK	evm.model.Chr1.1284	sRSDIDPASAK	0.875	0.875	0	0.494	0.495	0	0	46119.4	32033.5	40844.1	74387.2	0	52067
evm.model.Chr1.1284_S619	TPNGRFIRSRSDIDPASAKRS	evm.model.Chr1.1284	SRsDIDPASAK	0.954	0	0.954	0	0	0.91	0.935	42476.9	36464.9	40645.8	53774.3	60003.8	52402.2
evm.model.Chr1.1284_S684	ANRSVNNRARSPGAQQPHRTF	evm.model.Chr1.1284	ARsPGAQQPHR;sPGAQQPHR	1	1	1	1	1	1	1	242996	300861	235884	216971	207728	149794
evm.model.Chr1.1290_S139	EAPKEEAQAASAPEEPAKQEE	evm.model.Chr1.1290	EEAQAAsAPEEPAK	1	1	0	0	0	0	0	12200.7	0	0	0	0	0
evm.model.Chr1.1290_S225	EDIKETPNEESKEDTKKSGKS	evm.model.Chr1.1290	ETPNEEsKEDTKK	0.946	0.946	0.934	0.799	0	0	0	13053.7	20722.7	8872.74	0	0	0
evm.model.Chr1.1290_S246	LKKILTGTFASIKRRTSNKKT	evm.model.Chr1.1290	ILTGTFAsIK;ILTGTFAsIKR;KILtGTFAsIK	0.969	0.959	0.968	0.953	0.969	0.964	0.969	1.84482e+06	2.18313e+06	2.92249e+06	1.28071e+06	1.59404e+06	2.05251e+06
evm.model.Chr1.1290_S273	EKVEEVKPDESPSGEEEKNEG	evm.model.Chr1.1290	VEEVKPDEsPSGEEEK;VEEVKPDEsPSGEEEKNEGETEDEPK	0.956	0.95	0	0.929	0.945	0.935	0.956	151883	1.38009e+06	1.80833e+06	60708.5	443641	25857.3
evm.model.Chr1.1290_S275	VEEVKPDESPSGEEEKNEGET	evm.model.Chr1.1290	VEEVKPDESPsGEEEK;VEEVKPDESPsGEEEKNEGETEDEPK	0.967	0.964	0.967	0.961	0.739	0	0.921	1.6563e+06	1.51782e+06	1.90109e+06	88227.1	433631	478108
evm.model.Chr1.1290_S364	TNEKDEEAEASPSKSPSIINS	evm.model.Chr1.1290	DEATNEKDEEAEAsPSK;DEATNEKDEEAEAsPSKsPSIINSVR;DEEAEAsPSKsPSIINSVR	0.965	0.959	0.96	0.963	0.495	0.495	0.965	1.23039e+06	1.03606e+06	1.73341e+06	340098	483476	521588
evm.model.Chr1.1290_S366	EKDEEAEASPSKSPSIINSVR	evm.model.Chr1.1290	DEATNEKDEEAEASPsK;DEEAEASPsKSPSIINSVR;DEEAEASPsKsPSIINSVR	0.955	0.955	0.931	0.951	0	0	0	798848	757932	822865	0	0	0
evm.model.Chr1.1290_S368	DEEAEASPSKSPSIINSVRNF	evm.model.Chr1.1290	DEATNEKDEEAEASPSKsPSIINSVR;DEATNEKDEEAEAsPSKsPSIINSVR;DEEAEASPSKsPSIINSVR;DEEAEASPsKsPSIINSVR;DEEAEAsPSKsPSIINSVR;sPSIINSVR	0.974	0.97	0.97	0.969	0.974	0.973	0.972	2468421	2.29676e+06	2.95623e+06	1.78038e+06	2.05875e+06	2.20173e+06
evm.model.Chr1.1290_S370	EAEASPSKSPSIINSVRNFFG	evm.model.Chr1.1290	SPsIINSVR	0.967	0	0.957	0.967	0	0.948	0.851	36941.3	27806.5	26904.8	0	34883.8	47827.3
evm.model.Chr1.1290_S374	SPSKSPSIINSVRNFFGSIGR	evm.model.Chr1.1290	SPSIINsVR	0.943	0	0	0	0	0.943	0.888	0	36123.8	27056.3	0	29150.9	32400.9
evm.model.Chr1.1290_S381	IINSVRNFFGSIGRKNSKKSK	evm.model.Chr1.1290	NFFGsIGR;NFFGsIGRK	1	1	1	1	1	1	1	593779	528517	1.00341e+06	423286	600371	657321
evm.model.Chr1.1290_S95	GFPSFRSSPKSPPTEDDKVVE	evm.model.Chr1.1290	SSPKsPPTEDDKVVEVK;sPPTEDDKVVEVK	0.974	0.97	0.97	0.969	0.974	0.973	0.971	532808	218662	453215	251357	340494	292454
evm.model.Chr1.1290_T127	DVATDEKKDETPEAPKEEAQA	evm.model.Chr1.1290	KDEtPEAPK	1	0	1	1	0	0	0	0	14693.7	6830.42	0	0	0
evm.model.Chr1.1290_T241	KSGKSLKKILTGTFASIKRRT	evm.model.Chr1.1290	ILtGTFASIK;KILtGTFASIK;KILtGTFAsIK	0.967	0	0	0.967	0	0	0	0	0	76982.1	0	0	0
evm.model.Chr1.1290_T256	SIKRRTSNKKTRKESVDEKVE	evm.model.Chr1.1290	tRKESVDEK	0.935	0	0	0.935	0	0	0	0	0	15685.3	0	0	0
evm.model.Chr1.1290_T285	SGEEEKNEGETEDEPKAAETP	evm.model.Chr1.1290	VEEVKPDESPSGEEEKNEGEtEDEPK	0.935	0.935	0	0	0	0	0	56760.6	0	67619.5	0	0	0
evm.model.Chr1.1290_T413	AKEDAPAADETPVQDEEKADE	evm.model.Chr1.1290	EDAPAADEtPVQDEEK	1	0	0	1	0	0	0	0	0	13308.1	0	0	0
evm.model.Chr1.1291_S1148	VDSVVNRTAASPSASPATNRS	evm.model.Chr1.1291	TAAsPSASPATNR	0.968	0.905	0.968	0.965	0.965	0.968	0.96	31039.7	39201.2	37470	71956.4	32205.6	33508
evm.model.Chr1.1291_S598	QPATNIQRRASLPLSLTSRKH	evm.model.Chr1.1291	AsLPLSLTSR;RAsLPLSLTSR	0.97	0.969	0.97	0.968	0	0	0	15027.6	97660.6	229810	0	0	0
evm.model.Chr1.1297_S147	TEAENVDKNLSEQETGAVSEL	evm.model.Chr1.1297	NLsEQETGAVSELSK	0.969	0.963	0.969	0.954	0	0	0	27560	22201.4	60503	0	0	0
evm.model.Chr1.1297_S89	RNNESKTQNESIETEINTDNE	evm.model.Chr1.1297	TQNEsIETEINTDNETK	0.96	0	0	0.96	0	0	0	0	0	20319.9	0	0	0
evm.model.Chr1.1297_T828	RQQADTGDALTPAKKAKTETP	evm.model.Chr1.1297	QQADTGDALtPAK;QQADTGDALtPAKK	0.969	0.966	0.969	0.966	0.966	0.963	0	116408	122909	61232.9	36574.3	84611.3	81256.6
evm.model.Chr1.1297_T96	QNESIETEINTDNETKTQNNF	evm.model.Chr1.1297	TQNESIETEINtDNETK	0.963	0.953	0.963	0.962	0	0	0	42372	44002.1	43052.5	0	0	0
evm.model.Chr1.1379_S36	QLQLNSMRKLSTIALALGVDR	evm.model.Chr1.1379	KLstIALALGVDR	1	1	0	0	0	0	0	230497	0	0	0	0	0
evm.model.Chr1.1379_T37	LQLNSMRKLSTIALALGVDRT	evm.model.Chr1.1379	KLstIALALGVDR	1	1	0	0	0	0	0	230497	0	0	0	0	0
evm.model.Chr1.1385_S43	VVIGADSRTTSGAYIANRVTD	evm.model.Chr1.1385	TTsGAYIANR	0.956	0.956	0.663	0.952	0	0	0	21689.4	15185.8	14156.1	0	0	0
evm.model.Chr1.1396_S545	VTNLLKETTASLKEEPIRLSS	evm.model.Chr1.1396	ETTAsLKEEPIR	0.958	0	0	0	0	0.952	0.958	0	36036.8	0	0	24608.9	28603.7
evm.model.Chr1.1399_S76	KRVTKQGVPLSPQQRLDIRNY	evm.model.Chr1.1399	QGVPLsPQQR	1	1	1	1	1	1	0	56668.7	49668.1	37919.7	43378.8	41778.6	57849
evm.model.Chr1.1408_S178	EILRLRETPESDDAAFTKYRL	evm.model.Chr1.1408	ETPEsDDAAFTK	0.968	0.967	0	0.966	0	0.967	0.968	45236.7	45481	35305.2	40781.7	33325.7	29388.7
evm.model.Chr1.1408_S215	KKSHFLPASLSPPKEERLLIL	evm.model.Chr1.1408	SHFLPASLsPPK;SHFLPASLsPPKEER	0.959	0	0	0.959	0	0	0	15845.5	0	203606	0	0	0
evm.model.Chr1.1411_S613	NTQIDLPKEDSENEVIVITGK	evm.model.Chr1.1411	EDsENEVIVITGK	0.973	0.967	0.969	0.962	0.967	0.973	0.963	75908.8	70188.5	104036	28712.6	52780.8	30868.9
evm.model.Chr1.1411_S837	VSFPRIGDQSSTVRIKGPSEC	evm.model.Chr1.1411	IGDQSsTVR	0.958	0.49	0.49	0.943	0	0.958	0.492	0	25818.8	15183.8	37252.7	29467.8	29722.4
evm.model.Chr1.1411_S909	VKFPSRNNAPSQSEQPEVVEN	evm.model.Chr1.1411	NNAPsQSEQPEVVENGVNGEVNK	0.951	0.887	0.5	0.951	0	0	0	32151.8	24650.1	46246.1	0	0	0
evm.model.Chr1.1411_T838	SFPRIGDQSSTVRIKGPSECV	evm.model.Chr1.1411	IGDQSStVR	0.925	0	0.925	0	0	0	0	0	16909.6	16430.7	0	0	0
evm.model.Chr1.1417_S369	GSTKAKKSKKSLNIPDAQRSG	evm.model.Chr1.1417	sLNIPDAQR	1	0	1	1	1	1	1	46455.9	42246.4	45660.8	47803.5	45568.7	44121.8
evm.model.Chr1.1417_S793	IAVAIKRKRESSESSAESAPA	evm.model.Chr1.1417	EsSESsAESAPAPVVK;KREsSESSAESAPAPVVK;KREssESSAESAPAPVVK	0.958	0.957	0.756	0.488	0.958	0.595	0.611	69571.5	135219	201325	87788.2	99722.9	99523.2
evm.model.Chr1.1417_S794	AVAIKRKRESSESSAESAPAP	evm.model.Chr1.1417	ESsESSAESAPAPVVK;ESsESsAESAPAPVVK;ESsEsSAESAPAPVVK;KREssESSAESAPAPVVK	0.973	0.956	0.968	0.937	0.973	0.969	0.968	1.05914e+06	1.06372e+06	1.08183e+06	812767	626021	834484
evm.model.Chr1.1417_S796	AIKRKRESSESSAESAPAPVV	evm.model.Chr1.1417	ESSEsSAESAPAPVVK;ESsEsSAESAPAPVVK	0.947	0.527	0	0.784	0.947	0.896	0	169060	181933	240422	116811	0	0
evm.model.Chr1.1417_S797	IKRKRESSESSAESAPAPVVK	evm.model.Chr1.1417	ESSESsAESAPAPVVK;ESsESsAESAPAPVVK;EsSESsAESAPAPVVK	0.964	0.964	0.93	0.937	0.959	0.712	0.744	138161	147095	274244	105257	71385.7	208321
evm.model.Chr1.1417_S852	AKKLKVGDSESVDLSKTIDTT	evm.model.Chr1.1417	VGDSEsVDLSK	0.972	0.967	0.954	0.965	0.966	0.972	0.968	238403	210277	226074	279400	219084	302539
evm.model.Chr1.1417_S871	TTVTDSSILKSPEKKKKKKDK	evm.model.Chr1.1417	TIDTTVTDSSILKsPEK;TIDTTVTDSSILKsPEKK	0.967	0.967	0.967	0.966	0	0	0	564866	371641	1357377	28263	24324.6	143536
evm.model.Chr1.1438_S410	KELKTSLAGKSPNELRTDKEN	evm.model.Chr1.1438	TSLAGKsPNELR	0.967	0.965	0.967	0.934	0.962	0.966	0.965	1.5977e+06	1.50495e+06	1.58139e+06	947635	1.07775e+06	1106683
evm.model.Chr1.144_S176	NVVPVIAKSDSLTLEERAAFK	evm.model.Chr1.144	SDsLTLEER	0.953	0	0	0	0.953	0	0	0	0	0	31985.1	0	0
evm.model.Chr1.1456_S406	TVIATPFRTPSERGSGDGMTP	evm.model.Chr1.1456	TPNTVIAtPFRTPsER	0.954	0	0	0.954	0	0	0	0	0	66365.1	0	0	0
evm.model.Chr1.1456_S410	TPFRTPSERGSGDGMTPSIPT	evm.model.Chr1.1456	GsGDGMTPSIPTPR	0.972	0	0.969	0.968	0.641	0.972	0.969	104262	184193	151413	61719.6	108898	117366
evm.model.Chr1.1456_S423	GMTPSIPTPRSVTTTPGFTPR	evm.model.Chr1.1456	sVTTTPGFTPR;sVTTTPGFtPR;sVTTtPGFTPR;sVTTtPGFtPR	0.971	0.968	0.968	0.968	0.968	0.969	0.971	145402	151522	163615	95811.7	121631	137482
evm.model.Chr1.1456_S459	PKEDRLNLRASLSTLPTPRND	evm.model.Chr1.1456	AsLSTLPTPR	0.972	0.968	0.969	0.966	0.972	0.972	0.968	59823.7	59993.2	47878.1	51769.9	93151.5	65639
evm.model.Chr1.1456_T393	GITPTRPDIKTPNTVIATPFR	evm.model.Chr1.1456	tPNTVIATPFR	0.967	0.967	0.962	0.952	0	0	0	10701.7	18540.5	17513	0	0	0
evm.model.Chr1.1456_T400	DIKTPNTVIATPFRTPSERGS	evm.model.Chr1.1456	TPNTVIAtPFR;TPNTVIAtPFRTPsER	0.963	0.936	0.945	0.963	0.961	0.893	0.809	90247.3	86592.2	151164	56243.4	79350.5	98993.1
evm.model.Chr1.1456_T404	PNTVIATPFRTPSERGSGDGM	evm.model.Chr1.1456	TPNTVIATPFRtPSER	0.814	0	0	0.814	0	0	0	0	0	30909.3	0	0	0
evm.model.Chr1.1456_T415	PSERGSGDGMTPSIPTPRSVT	evm.model.Chr1.1456	GSGDGMtPSIPtPR	0.968	0.932	0.957	0.961	0	0	0.968	24216.8	29859.9	31717.6	0	0	33552.6
evm.model.Chr1.1456_T420	SGDGMTPSIPTPRSVTTTPGF	evm.model.Chr1.1456	GSGDGMTPSIPtPR;GSGDGMtPSIPtPR	0.971	0.969	0.958	0.961	0.971	0.966	0.968	132450	142426	166551	54361.1	85992.2	102338
evm.model.Chr1.1456_T427	SIPTPRSVTTTPGFTPRRDKL	evm.model.Chr1.1456	SVTTtPGFTPR;SVTTtPGFtPR;sVTTtPGFTPR;sVTTtPGFtPR	0.963	0.877	0.728	0.963	0	0.963	0.957	34318.6	32346.1	100397	0	73909.5	119185
evm.model.Chr1.1456_T431	PRSVTTTPGFTPRRDKLNINR	evm.model.Chr1.1456	SVTTTPGFtPR;SVTTtPGFtPR;sVTTTPGFtPR;sVTTtPGFtPR	0.96	0.95	0.948	0.955	0.96	0.956	0.94	341853	377564	347234	457123	413189	464050
evm.model.Chr1.1456_T445	DKLNINRDDMTPSNPKEDRLN	evm.model.Chr1.1456	DDMtPSNPK;DDMtPSNPKEDR	0.971	0.965	0.963	0.966	0	0.971	0	83651.1	68437.9	66877.6	0	83415.9	0
evm.model.Chr1.1462_S113	DQLMTLRKFGSVYEGHPTPKI	evm.model.Chr1.1462	FGsVYEGHPTPK;KFGsVYEGHPTPK	0.972	0.963	0.965	0	0.97	0.972	0.969	124962	154660	168607	81881.5	200715	178002
evm.model.Chr1.1468_S157	DLTVKRRRTDSNDDDQQDNED	evm.model.Chr1.1468	RTDsNDDDQQDNEDAADSALAGNK;TDsNDDDQQDNEDAADSALAGNK	0.964	0.961	0.964	0.948	0	0	0	383647	369717	408971	0	50134.3	0
evm.model.Chr1.1468_S1653	SPVTDDRSSMSPATMHFDPRY	evm.model.Chr1.1468	SSMsPATMHFDPR	0.96	0	0.924	0	0	0.96	0	180930	221893	271682	118548	138920	112197
evm.model.Chr1.1468_S666	ALPRTLATSYSPKTTGQYQAY	evm.model.Chr1.1468	TLATSYsPK	0.958	0	0.955	0	0	0	0.958	0	37456.3	0	0	0	100450
evm.model.Chr1.1468_S763	DNWRDSPVEESSDQHIKAEAM	evm.model.Chr1.1468	DSPVEEsSDQHIK	0.933	0	0.933	0.867	0	0	0	0	21794.1	20258.5	0	0	0
evm.model.Chr1.1472_S309	DNERAPLLTHSSVESSPNSSR	evm.model.Chr1.1472	APLLTHssVESSPNSSR;APLLTHssVESsPNSSR	0.953	0.953	0.675	0.588	0.393	0	0.888	129694	406040	506590	247919	71097.6	25361
evm.model.Chr1.1472_S310	NERAPLLTHSSVESSPNSSRR	evm.model.Chr1.1472	APLLTHSsVESSPNSSR;APLLTHSsVESsPNSSR;APLLTHssVESSPNSSR;APLLTHssVESsPNSSR	0.953	0.953	0.881	0.923	0.393	0.935	0.888	379945	868108	876108	435545	302736	233847
evm.model.Chr1.1472_S314	PLLTHSSVESSPNSSRRATGF	evm.model.Chr1.1472	APLLTHSSVESsPNSSR;APLLTHSsVESsPNSSR;APLLTHssVESsPNSSR	0.953	0.953	0.847	0.909	0	0.943	0.874	768524	883899	958965	463376	563817	607658
evm.model.Chr1.1477_S422	DKRIQRPDEYSDSEDEGEGGR	evm.model.Chr1.1477	IQRPDEYsDSEDEGEGGR;IQRPDEYsDSEDEGEGGRK;IQRPDEYsDsEDEGEGGR;IQRPDEYsDsEDEGEGGRK;IQRPDEysDSEDEGEGGRK	0.969	0.942	0.969	0.968	0.954	0	0.959	4.23003e+06	6.11101e+06	6601729	1.70238e+06	2.58247e+06	2.82181e+06
evm.model.Chr1.1477_S424	RIQRPDEYSDSEDEGEGGRKN	evm.model.Chr1.1477	IQRPDEYSDsEDEGEGGR;IQRPDEYSDsEDEGEGGRK;IQRPDEYsDsEDEGEGGR;IQRPDEYsDsEDEGEGGRK	0.969	0	0.969	0.968	0	0	0	4.12335e+06	4507348	6534311	1.11993e+06	1.61291e+06	1.9868e+06
evm.model.Chr1.1477_Y421	SDKRIQRPDEYSDSEDEGEGG	evm.model.Chr1.1477	IQRPDEysDSEDEGEGGRK	0.916	0.916	0	0	0	0	0	261265	593779	0	0	0	0
evm.model.Chr1.1497_S156	KAKQSRAKMFSDQASARRLKN	evm.model.Chr1.1497	MFsDQASAR	0.973	0.97	0.964	0.958	0.97	0.973	0.973	326624	305091	273786	458967	416527	452705
evm.model.Chr1.1497_S160	SRAKMFSDQASARRLKNKEGR	evm.model.Chr1.1497	MFSDQAsAR	0.971	0.937	0	0	0.971	0.97	0.969	688909	653897	593238	970711	848724	880296
evm.model.Chr1.1501_S474	GEYAMVADDDSEGEESQSTDS	evm.model.Chr1.1501	NNDNGEYAMVADDDsEGEESQSTDSQSTSK	0.968	0.968	0.968	0.966	0	0	0	161381	162645	250129	0	0	0
evm.model.Chr1.1501_S506	KSNRASKKGGSTPTAPPSGIK	evm.model.Chr1.1501	KGGsTPTAPPSGIK;KGGstPTAPPSGIK	0.971	0.961	0.966	0.966	0.971	0.493	0.964	441342	400556	363867	340732	347964	314501
evm.model.Chr1.1501_T507	SNRASKKGGSTPTAPPSGIKK	evm.model.Chr1.1501	GGStPTAPPSGIK;KGGStPTAPPSGIK;KGGstPTAPPSGIK	0.971	0.961	0.966	0.966	0.971	0.95	0.964	334251	189912	249980	645049	316050	352745
evm.model.Chr1.1517_S100	GLQGGVKIVYSPDEVKEVASQ	evm.model.Chr1.1517	IVYsPDEVK	0.962	0	0.962	0	0	0	0	0	12981.5	0	0	25228.5	0
evm.model.Chr1.152_S80	QNDVEKQMTLSPPPSAASYNF	evm.model.Chr1.152	QMTLsPPPSAASYNFPTIEEK	0.96	0	0	0.96	0	0	0	0	0	207498	0	0	0
evm.model.Chr1.1534_S83	ELEVQQRDPSSPLYSVKSFDD	evm.model.Chr1.1534	DPSsPLYSVK	0.97	0.947	0.657	0.898	0.97	0.959	0.969	49561.8	51495.8	76818.3	58659.9	39257.1	41030.6
evm.model.Chr1.1574_S522	PPKSYHVDLESAEDRREREQQ	evm.model.Chr1.1574	SYHVDLEsAEDR;SYHVDLEsAEDRR	0.97	0.97	0.942	0.965	0	0	0.943	79898.2	71683.3	146132	0	0	41929.9
evm.model.Chr1.1574_S58	DKKVTEKSKQSVEMEDKSESM	evm.model.Chr1.1574	SKQsVEMEDK	0.969	0.969	0.968	0.94	0	0.953	0.964	88808.4	76975.5	117270	88423.1	126313	82812.5
evm.model.Chr1.1574_S65	SKQSVEMEDKSESMETEPAEK	evm.model.Chr1.1574	QSVEMEDKsESMETEPAEK	0.952	0.952	0	0.922	0	0	0	172703	166698	176325	0	0	0
evm.model.Chr1.1574_S67	QSVEMEDKSESMETEPAEKSQ	evm.model.Chr1.1574	SEsMETEPAEK;SEsMEtEPAEK	0.973	0.965	0.97	0.967	0.973	0.972	0.969	531169	475481	438661	501046	504920	462308
evm.model.Chr1.1574_T70	EMEDKSESMETEPAEKSQEEI	evm.model.Chr1.1574	SEsMEtEPAEK	0.966	0.926	0.966	0.957	0	0	0	23053.2	24189.7	23560.4	0	0	0
evm.model.Chr1.1578_S134	FVINRPDIYKSPASDTYIVFG	evm.model.Chr1.1578	sPASDTYIVFGEAK	0.967	0.967	0.921	0.964	0	0	0	19506.4	16925.2	40812.9	0	0	0
evm.model.Chr1.1578_S137	NRPDIYKSPASDTYIVFGEAK	evm.model.Chr1.1578	SPAsDTYIVFGEAK	0.943	0	0	0.943	0	0	0	0	0	10147	0	0	0
evm.model.Chr1.1578_S184	ATTVPTVQEDSDEEVDESEVE	evm.model.Chr1.1578	NKTPTAAESATTVPTVQEDsDEEVDESEVEAK;TPTAAESATTVPTVQEDsDEEVDESEVEAK;TPTAAESATTVPTVQEDsDEEVDEsEVEAK	0.972	0.968	0.969	0.967	0.972	0.964	0.97	2.44833e+06	947442	9617835	783297	206033	100195
evm.model.Chr1.1578_S191	QEDSDEEVDESEVEAKDVELV	evm.model.Chr1.1578	TPTAAESATTVPTVQEDsDEEVDEsEVEAK	0.962	0	0	0.962	0	0	0	0	0	81452.9	0	0	0
evm.model.Chr1.1578_T179	TAAESATTVPTVQEDSDEEVD	evm.model.Chr1.1578	NKTPTAAESATTVPtVQEDSDEEVDESEVEAK	0.962	0	0	0.962	0	0	0	0	0	53888	0	0	0
evm.model.Chr1.1592_S17	IRTPIFAGSGSPIVKQTAIHN	evm.model.Chr1.1592	TPIFAGSGsPIVK	0.964	0.963	0.959	0.964	0	0.963	0.956	99286.6	92581.3	120513	37340.4	60694.3	56607.8
evm.model.Chr1.1592_S205	AGGSAYNSRLSDSLNFTHRTT	evm.model.Chr1.1592	LsDSLNFTHR	0.968	0	0.514	0.925	0	0.959	0.968	0	19150.7	61785.6	0	44771.7	32883.7
evm.model.Chr1.1592_S207	GSAYNSRLSDSLNFTHRTTPA	evm.model.Chr1.1592	LSDsLNFTHR	0.965	0.965	0	0	0	0	0	22436.6	0	0	0	0	12007.7
evm.model.Chr1.1592_S591	AELKQTSKLYSPSAGGKP***	evm.model.Chr1.1592	LYsPSAGGKP	0.968	0.968	0.874	0.917	0.966	0.866	0.937	112292	23602.4	54893.9	104730	139015	137489
evm.model.Chr1.1608_S205	KGIEENNEDGSPIEPSGVEEA	evm.model.Chr1.1608	GIEENNEDGsPIEPSGVEEAR	0.97	0	0.967	0.968	0	0.97	0.969	71090.2	68400.9	87090.3	0	32318.1	25230.6
evm.model.Chr1.1608_S329	RNRERSQRNESPPRRQVHRTR	evm.model.Chr1.1608	NEsPPRR	1	1	0	1	0	0	0	223021	261639	266533	0	271209	0
evm.model.Chr1.1608_S386	QSRSPPPRRRSPSPVPRRRVD	evm.model.Chr1.1608	RRsPSPVPR;RRsPsPVPR;RsPsPVPR;sPsPVPR	1	1	1	1	1	1	1	2.07473e+06	2.17312e+06	2.20332e+06	2.02451e+06	1.92855e+06	1.73504e+06
evm.model.Chr1.1608_S388	RSPPPRRRSPSPVPRRRVDAE	evm.model.Chr1.1608	RRsPsPVPR;RSPsPVPR;RsPsPVPR;sPsPVPR	1	1	1	1	1	1	1	2.04611e+06	2.13677e+06	2.1721e+06	2.02451e+06	1.93183e+06	1.73504e+06
evm.model.Chr1.1608_S617	RMTVSLSSVKSEELTDPASVP	evm.model.Chr1.1608	sEELTDPASVPMSK	0.969	0.969	0.958	0.967	0	0	0	13038.6	17544.1	14790.7	0	0	0
evm.model.Chr1.1608_S677	PKVEEPMRKPSPVPEIITTAT	evm.model.Chr1.1608	KPsPVPEIITTATNK	0.968	0.959	0.962	0.967	0	0	0.968	308408	211727	677955	0	49274.4	58357.3
evm.model.Chr1.1608_T360	RNSSPPRRRRTRSPPPRRSPP	evm.model.Chr1.1608	tRSPPPR	0.842	0	0	0.842	0	0	0	0	83272.3	75429.5	0	94852.3	0
evm.model.Chr1.1608_T546	NIWEPLLQPDTPPPKNLEEVP	evm.model.Chr1.1608	ETENIWEPLLQPDtPPPK	0.971	0.966	0.971	0.969	0	0	0	36977.8	6609.24	368665	0	0	0
evm.model.Chr1.1608_T621	SLSSVKSEELTDPASVPMSKT	evm.model.Chr1.1608	SEELtDPASVPMSK	0.957	0.957	0.952	0.942	0	0	0	43528	20214.9	18458.1	0	0	0
evm.model.Chr1.1636.3_S225	NRLKKVQKSISTGGLSERVRK	evm.model.Chr1.1636.3	SIsTGGLSER	0.957	0	0	0.957	0	0	0	70124.9	59840.2	61590.9	89520.3	83798.7	0
evm.model.Chr1.1636.3_S276	PDMRIMLRRLSQMSKLVNKKC	evm.model.Chr1.1636.3	RLsQMSK	0.852	0.852	0.836	0	0.527	0.841	0	38513	43443.5	45140.5	56826.6	38623	43097.8
evm.model.Chr1.1642_S136	TYGFMKDHENSDDEDGLSYKK	evm.model.Chr1.1642	DHENsDDEDGLSYK	0.971	0.968	0.963	0.967	0.951	0.971	0.967	134738	135186	127967	64735.5	70484.7	99748.6
evm.model.Chr1.1656_S257	KPLIQEQNAMS**********	evm.model.Chr1.1656	PLIQEQNAMs	1	0	1	1	0	0	0	19727.3	36732.6	99058.4	0	28102	33614.9
evm.model.Chr1.1672_S433	KLYETADDEDSQIQLTKARVE	evm.model.Chr1.1672	LYETADDEDsQIQLTK	0.969	0.967	0.969	0.909	0	0	0	26050.2	20886.8	37611.6	0	0	0
evm.model.Chr1.1672_T81	SVRTPRSSGLTPGRTGRGTMT	evm.model.Chr1.1672	SSGLtPGR	0.886	0	0.883	0.886	0	0.877	0	0	0	20605	21179.6	29557	0
evm.model.Chr1.1676_S92	ARRTNVSRRKSVSAEGFDPDA	evm.model.Chr1.1676	KsVSAEGFDPDADDDDDEK;RKsVSAEGFDPDADDDDDEK;RKsVsAEGFDPDADDDDDEK;sVSAEGFDPDADDDDDEK;sVSAEGFDPDADDDDDEKIVHPK;sVsAEGFDPDADDDDDEK	1	0.971	1	1	0.974	0.973	0.972	9859778	9537146	10200000	5.47719e+06	8554572	9089244
evm.model.Chr1.1676_S94	RTNVSRRKSVSAEGFDPDADD	evm.model.Chr1.1676	RKsVsAEGFDPDADDDDDEK;SVsAEGFDPDADDDDDEK;sVsAEGFDPDADDDDDEK	1	0	1	1	0	0	0	21699.1	114206	156302	0	0	0
evm.model.Chr1.1677.2_S48	EQDIGKAADASKTDDEVVQRE	evm.model.Chr1.1677.2	AADAsKTDDEVVQR	0.967	0.967	0.964	0.953	0	0.967	0	41085.4	33648.2	33400.8	0	30423.7	36551.9
evm.model.Chr1.1702_S86	KEVPVKPEEKSPVEKKKPKRL	evm.model.Chr1.1702	EVPVKPEEKsPVEK	1	1	1	1	1	1	1	4452772	4007475	4.01429e+06	2224777	3239989	2863445
evm.model.Chr1.1702_T602	MKKFTIGDDWTPKKLDVSVEM	evm.model.Chr1.1702	FTIGDDWtPK	0.967	0	0	0.967	0	0	0	0	0	13803.2	0	0	0
evm.model.Chr1.1709_S745	GQYYSKTISSSPQGDGYVRTE	evm.model.Chr1.1709	TISSsPQGDGYVR	0.97	0.968	0.969	0.953	0.965	0.97	0.943	226381	208489	202812	216076	213594	218632
evm.model.Chr1.1709_Y751	TISSSPQGDGYVRTELMQHIP	evm.model.Chr1.1709	TISSSPQGDGyVR	0.972	0.968	0.953	0.966	0.972	0.969	0.967	466464	463164	411776	430924	451972	447232
evm.model.Chr1.1722_S10	*MSYLETPDGSPRKTRISRRV	evm.model.Chr1.1722	SYLETPDGsPR;SYLETPDGsPRK;SYLEtPDGsPR;SYLEtPDGsPRK	0.972	0.969	0.97	0.966	0.972	0.972	0.97	1.00375e+06	986221	939031	985254	1.03386e+06	1098854
evm.model.Chr1.1722_S28	RRVRSVHDVLSPQSKVDALLL	evm.model.Chr1.1722	SVHDVLsPQSK	0.964	0.964	0.94	0.494	0.868	0.96	0.946	162026	146978	146665	136738	119648	152639
evm.model.Chr1.1722_S394	KINVTKHHILSPVRRTKYKSV	evm.model.Chr1.1722	HHILsPVR	1	1	1	1	1	1	1	390184	450809	393220	193598	408932	283376
evm.model.Chr1.1722_T6	*****MSYLETPDGSPRKTRI	evm.model.Chr1.1722	SYLEtPDGSPR;SYLEtPDGsPR;SYLEtPDGsPRK	0.97	0.968	0.964	0.961	0.966	0.97	0.97	66239.6	84073.2	199224	68176.9	73939.1	105529
evm.model.Chr1.1730_S116	ILGKGSLRDKSKEDELLKSAE	evm.model.Chr1.1730	DKsKEDELLK	1	1	1	0	0	1	0	39179	39228.9	32985.5	0	31151	0
evm.model.Chr1.1730_S44	EIDKVKNPTPSPKPGSHDFKL	evm.model.Chr1.1730	NPTPsPKPGSHDFK;VKNPTPsPK;VKNPTPsPKPGSHDFK	0.972	0.968	0.968	0.966	0.971	0.972	0.972	2699632	2515351	2.52336e+06	888694	1.43859e+06	1.42796e+06
evm.model.Chr1.1760_S134	TNYRVIVENLSTRVSWQDLKD	evm.model.Chr1.1760	VIVENLsTR	0.937	0	0.937	0.5	0.5	0.5	0.5	0	21592.1	11684.3	0	17469.7	29432.3
evm.model.Chr1.1760_S138	VIVENLSTRVSWQDLKDYLRE	evm.model.Chr1.1760	VsWQDLK	1	1	0	1	1	0	0	26797.8	0	32974.4	0	0	0
evm.model.Chr1.1760_S276	SPNDKDGRSRSRSHSPNNNYD	evm.model.Chr1.1760	sRsHSPNNNYD;sRsHsPNNNYD	0.967	0.717	0.962	0.966	0.686	0.955	0.967	44242.9	51165	114081	54824.8	53151.9	30722.3
evm.model.Chr1.1760_S278	NDKDGRSRSRSHSPNNNYD**	evm.model.Chr1.1760	sRsHSPNNNYD;sRsHsPNNNYD	0.967	0.627	0.962	0.966	0.686	0.955	0.967	44242.9	51165	114081	54824.8	53151.9	30722.3
evm.model.Chr1.1760_S280	KDGRSRSRSHSPNNNYD****	evm.model.Chr1.1760	sRsHsPNNNYD	0.955	0	0	0.955	0	0	0	0	0	48097.8	0	0	0
evm.model.Chr1.1761_S395	GKSSKGSSRSSTPTTESAGGQ	evm.model.Chr1.1761	SsTPTTESAGGQTSK	0.964	0	0.964	0.485	0	0	0	0	18177.6	16181	0	27623.8	0
evm.model.Chr1.1761_S424	VKKKLESGRQSPLASSMLGKR	evm.model.Chr1.1761	KLESGRQsPLASSMLGK;LESGRQsPLASSMLGK;QsPLASSMLGK	0.974	0.97	0.961	0.969	0.974	0.973	0.972	1728508	1.61222e+06	1.71241e+06	1.23e+06	1.39865e+06	1.47084e+06
evm.model.Chr1.1761_S428	LESGRQSPLASSMLGKRGASS	evm.model.Chr1.1761	KLESGRQSPLAsSMLGK	0.917	0	0	0.917	0	0	0	0	0	28629.2	0	0	0
evm.model.Chr1.1761_S460	TNQPGYSGSTSPTKDIGQHGI	evm.model.Chr1.1761	TNQPGYSGSTsPTK	0.966	0.96	0.964	0.965	0.951	0.966	0.736	602925	515129	514333	535742	502169	538684
evm.model.Chr1.1761_T170	FNRKIRHRTLTDEEAEAAWDK	evm.model.Chr1.1761	TLtDEEAEAAWDK;TLtDEEAEAAWDKR	0.959	0.931	0.953	0.959	0.825	0.955	0.93	243359	150924	306787	34651.7	68680	88340.8
evm.model.Chr1.1761_T396	KSSKGSSRSSTPTTESAGGQT	evm.model.Chr1.1761	SStPTTESAGGQTSK	0.971	0.967	0.962	0.966	0.971	0.959	0.952	170114	151143	132680	148080	157459	114642
evm.model.Chr1.1761_T462	QPGYSGSTSPTKDIGQHGITE	evm.model.Chr1.1761	TNQPGYSGSTSPtK	0.948	0.948	0	0	0	0	0	12611	0	0	0	0	0
evm.model.Chr1.1771_Y200	QLVRGEPNVSYICSRYYRAPE	evm.model.Chr1.1771	GEPNVSyICSR	0.967	0.966	0.958	0.956	0.958	0.967	0.929	434769	287824	353315	468535	446286	450691
evm.model.Chr1.1779_S18	LPTLKESQKISVPELKLLLEK	evm.model.Chr1.1779	ESQKIsVPELK	0.898	0.812	0	0.898	0	0	0	26920.5	0	30343	0	41576.7	0
evm.model.Chr1.1779_S40	DPLVIDVRNASEIESSGSIAS	evm.model.Chr1.1779	NAsEIESSGSIASK	0.97	0.948	0.955	0.955	0.97	0.969	0.964	128119	123730	68305.9	132058	73176.6	130500
evm.model.Chr1.1789_S110	VTKKAAKEEDSDDDDDEDDDD	evm.model.Chr1.1789	AAKEEDsDDDDDEDDDDDsEEEETEVK;EEDsDDDDDEDDDDDSEEEETEVK;EEDsDDDDDEDDDDDsEEEETEVK	0.967	0	0.967	0.964	0	0	0	0	100776	399448	0	0	0
evm.model.Chr1.1789_S122	DDDDEDDDDDSEEEETEVKAA	evm.model.Chr1.1789	AAKEEDsDDDDDEDDDDDsEEEETEVK;EEDSDDDDDEDDDDDsEEEETEVK;EEDsDDDDDEDDDDDsEEEETEVK	0.962	0	0.954	0.962	0	0	0	0	170176	510236	0	0	0
evm.model.Chr1.1789_S137	TEVKAAAKDESDDDDEGDDDD	evm.model.Chr1.1789	AAAKDEsDDDDEGDDDDDDDsEDETDAK	0.933	0	0	0.933	0	0	0	0	0	24375.1	0	0	0
evm.model.Chr1.1789_S151	DEGDDDDDDDSEDETDAKKSK	evm.model.Chr1.1789	AAAKDEsDDDDEGDDDDDDDsEDETDAK	0.933	0	0	0.933	0	0	0	0	0	24375.1	0	0	0
evm.model.Chr1.1789_S291	EAVSKREERKSGDFGGNRNDK	evm.model.Chr1.1789	KsGDFGGNR;sGDFGGNR	1	1	1	1	1	1	1	142101	138091	156767	233647	297388	45513.1
evm.model.Chr1.1789_S51	VEEPVKVEEESEEEESSDEEV	evm.model.Chr1.1789	EVVEEPVKVEEEsEEEESsDEEVAEK;EVVEEPVKVEEEsEEEEssDEEVAEK	1	0	1	1	0	0	0	0	97175	3573651	0	0	0
evm.model.Chr1.1789_S539	PRGGAAKHKGSIQAFEGKRTK	evm.model.Chr1.1789	HKGsIQAFEGK	1	1	0	1	1	0	1	63956.7	0	87572.6	50312.4	0	52130.5
evm.model.Chr1.1789_S56	KVEEESEEEESSDEEVAEKEN	evm.model.Chr1.1789	EVVEEPVKVEEESEEEEssDEEVAEK;EVVEEPVKVEEEsEEEEssDEEVAEK	1	0	1	1	0	0	0	0	97175	3588575	0	0	0
evm.model.Chr1.1789_S57	VEEESEEEESSDEEVAEKENK	evm.model.Chr1.1789	EVVEEPVKVEEESEEEEssDEEVAEK;EVVEEPVKVEEEsEEEESsDEEVAEK;EVVEEPVKVEEEsEEEEssDEEVAEK	1	0	1	1	0	0	0	0	97175	3.58857e+06	0	0	0
evm.model.Chr1.1789_S81	KNGKKVVKEESEDEDEDSDEE	evm.model.Chr1.1789	EEsEDEDEDSDEEDLEEEEEK;EEsEDEDEDsDEEDLEEEEEK;VVKEEsEDEDEDSDEEDLEEEEEK;VVKEEsEDEDEDsDEEDLEEEEEK	1	1	1	1	0	0	1	1.83417e+06	2.39914e+06	6328386	9394.17	0	123918
evm.model.Chr1.1789_S88	KEESEDEDEDSDEEDLEEEEE	evm.model.Chr1.1789	EESEDEDEDsDEEDLEEEEEK;EEsEDEDEDsDEEDLEEEEEK;VVKEESEDEDEDsDEEDLEEEEEK;VVKEEsEDEDEDsDEEDLEEEEEK	1	1	1	1	0	0.969	1	2.84372e+06	3176461	6.99761e+06	9394.17	406886	575770
evm.model.Chr1.1789_T15	KKKSKGDKTATIKPVKIAKTK	evm.model.Chr1.1789	TAtIKPVK	0.913	0	0	0	0	0.913	0.821	0	0	0	0	0	45022.9
evm.model.Chr1.1794_S259	PNYLEEEPSESPTKDDKAVAR	evm.model.Chr1.1794	DLPNYLEEEPSEsPTK;DLPNYLEEEPSEsPTKDDK	0.962	0.959	0.95	0.962	0	0	0.492	422239	257807	703190	0	28010.8	27772.3
evm.model.Chr1.1794_T261	YLEEEPSESPTKDDKAVARPD	evm.model.Chr1.1794	DLPNYLEEEPSESPtK	0.946	0	0.946	0	0	0	0	106913	81614.2	178609	0	0	0
evm.model.Chr1.1813_S1343	DLKEEKQLSKSQDDLTSSGNK	evm.model.Chr1.1813	sQDDLTSSGNKPSMPR	0.968	0.967	0.947	0	0.968	0	0	313815	312931	346867	179902	246646	204833
evm.model.Chr1.1813_S312	SSDVKLRKSISADADPVNNSR	evm.model.Chr1.1813	SIsADADPVNNSR	0.969	0.966	0.968	0.954	0.969	0.965	0.969	60218.9	51867.8	44351.5	75370.6	61290.1	81131.4
evm.model.Chr1.1830_S53	ASKELSNKWDSDWDKRDGENG	evm.model.Chr1.1830	WDsDWDKR	1	1	1	1	0	0	0	41197.7	43191.9	41371.9	0	24673.2	30635.8
evm.model.Chr1.1832_S1297	SPQPRMRRDTSPTGSLQDELH	evm.model.Chr1.1832	DTsPTGSLQDELHPSR;DTsPTGsLQDELHPSR;RDTsPTGSLQDELHPSR	0.965	0.965	0.965	0.965	0	0	0	922359	765211	1.43681e+06	87420.1	0	188499
evm.model.Chr1.1832_S1301	RMRRDTSPTGSLQDELHPSRP	evm.model.Chr1.1832	DTSPTGsLQDELHPSR;DTsPTGsLQDELHPSR	0.965	0.965	0.965	0.957	0	0	0	454145	345893	809737	0	0	0
evm.model.Chr1.1832_T1280	QPGTLVRNGGTPNFERSSPQP	evm.model.Chr1.1832	NGGtPNFER	1	0	0	1	0	1	1	0	0	12927.9	0	15005.6	0
evm.model.Chr1.1835_S107	NDEKNNKKENSDDGRPVGSST	evm.model.Chr1.1835	ENsDDGRPVGSSTSLK;KENsDDGRPVGSSTSLK	0.964	0.96	0.964	0	0	0	0	21936.5	12701.4	44528.6	0	0	0
evm.model.Chr1.1835_S27	TFDVRKISMKSDFSKIIGDLR	evm.model.Chr1.1835	ISMKsDFSK	0.962	0.818	0.953	0.923	0	0.957	0.962	26742.5	29177.6	29184.8	35187	22838.7	27107.8
evm.model.Chr1.1835_S433	LKSEKEGEVQSIKEPDIKVTK	evm.model.Chr1.1835	EGEVQsIKEPDIK	1	1	1	0	0	0	1	40960.2	34867.1	49731.3	0	0	55507.7
evm.model.Chr1.1873_S1556	KPVYNALNKHSPKKTCIVFVP	evm.model.Chr1.1873	PVYNALNKHsPK	0.969	0.967	0.953	0.94	0.833	0.638	0.969	66174.9	84895.2	62327.4	33071.2	27667.3	31091.5
evm.model.Chr1.1873_S396	QSKLDADLKTSDADTAADHGF	evm.model.Chr1.1873	TsDADTAADHGFQPSQK	0.942	0	0	0.942	0	0	0	0	0	44771.9	0	0	0
evm.model.Chr1.1874.1_S97	AMGNLKIDFGSPERADDARQL	evm.model.Chr1.1874.1	IDFGsPER	1	1	1	1	1	1	1	50906.9	66837	52976.6	79891.1	89910.3	89887.1
evm.model.Chr1.1875.2_S210	NRNNISIDDQSDSDSVSGRSK	evm.model.Chr1.1875.2	NNISIDDQsDSDSVSGR	0.949	0.936	0.949	0.885	0.939	0.88	0.93	63689	61057.4	60432.3	21548.6	35545.4	37819.3
evm.model.Chr1.1878_S23	VHAKPDNVRVSYGTAGFRGNA	evm.model.Chr1.1878	VsYGTAGFR	0.971	0.959	0.963	0.959	0.971	0.958	0	80022.9	80825.2	85711.8	79064.9	72008.5	80502
evm.model.Chr1.1883_S479	CVRILNDEQSSDAELREKFGE	evm.model.Chr1.1883	ILNDEQSsDAELR	0.938	0.929	0	0.698	0	0.908	0.938	34586.3	0	36989.1	0	43162.6	42569.5
evm.model.Chr1.1883_S496	KFGEKWRRKPSAELTLPLRQE	evm.model.Chr1.1883	KPsAELTLPLR	0.964	0	0	0.964	0	0	0	0	0	34388.5	0	0	0
evm.model.Chr1.1883_S763	KPPARPPPPKSPGNTFPSQEQ	evm.model.Chr1.1883	sPGNTFPSQEQPPK;sPGNTFPSQEQPPKPAPR	0.973	0.97	0.97	0.968	0.973	0.973	0.972	4314924	4119869	4854527	1.04699e+06	1.96032e+06	2.97801e+06
evm.model.Chr1.1892_S135	TGRPPLKPRVSPNSSLSSTHS	evm.model.Chr1.1892	VsPNSSLSSTHSTSNK	0.97	0.968	0.959	0.967	0	0.964	0.97	382432	363577	340163	254071	307577	286652
evm.model.Chr1.1892_S53	NHSAKLKKRKSVENDLRNSKR	evm.model.Chr1.1892	RKsVENDLR;sVENDLR	1	1	1	1	0	0	0	0	21653.6	18781.7	0	0	0
evm.model.Chr1.1905_S1947	LSCMSELKSSSVDLPSSPRTN	evm.model.Chr1.1905	SSsVDLPSSPR	0.954	0.682	0	0.923	0	0	0.954	11617.3	18579.5	14525.2	0	16962.6	24285.4
evm.model.Chr1.1905_S1953	LKSSSVDLPSSPRTNIIREVA	evm.model.Chr1.1905	SSSVDLPSsPR	0.967	0.964	0.96	0.933	0.914	0.967	0.962	1.22686e+06	1206267	1071044	1.22828e+06	1.13793e+06	1.25953e+06
evm.model.Chr1.1906_T138	KLSKNKQKAITPDLGDKLARE	evm.model.Chr1.1906	AItPDLGDK	1	1	1	1	0	1	1	24928.4	32166.9	19408.8	0	26088.5	24291.3
evm.model.Chr1.1907_S205	TTEMLVSRHNSTFNLKNMVLA	evm.model.Chr1.1907	HNsTFNLK	0.967	0.945	0.967	0	0.5	0.5	0.5	140491	141052	132309	110491	106005	100249
evm.model.Chr1.1907_S360	TAAQCSKIASSGLSDTAIEAA	evm.model.Chr1.1907	IASsGLSDTAIEAAK	0.951	0	0.951	0.944	0	0	0.951	30005	23627	40561.1	0	0	0
evm.model.Chr1.1907_T365	SKIASSGLSDTAIEAAKQRLK	evm.model.Chr1.1907	IASSGLSDtAIEAAK	0.945	0	0.765	0.945	0	0	0	11927.8	9369.2	17332	0	0	0
evm.model.Chr1.1911_S394	ARTAERQRLLSLGHQGPARRI	evm.model.Chr1.1911	LLsLGHQGPAR	1	1	1	1	1	1	1	60563.8	57293	63758.1	42359.8	44441.6	51501
evm.model.Chr1.1930_S265	ARKISNVEKLSPQFENLTVSK	evm.model.Chr1.1930	ISNVEKLsPQFENLTVSK;LsPQFENLTVSK	0.966	0.966	0.963	0.963	0.915	0.956	0.877	285633	282743	569588	80229	139035	168485
evm.model.Chr1.1930_S276	PQFENLTVSKSSDKISDPLEV	evm.model.Chr1.1930	sSDKISDPLEVEDDK	0.967	0.967	0.963	0.964	0.961	0	0.966	1.68016e+06	1.5213e+06	1.95907e+06	444979	780279	939966
evm.model.Chr1.1930_S277	QFENLTVSKSSDKISDPLEVE	evm.model.Chr1.1930	SsDKISDPLEVEDDK	0.94	0	0	0	0	0.94	0	0	0	0	443867	755940	0
evm.model.Chr1.1930_S281	LTVSKSSDKISDPLEVEDDKM	evm.model.Chr1.1930	SSDKIsDPLEVEDDK	0.959	0.765	0.959	0.695	0	0	0	19739.3	17424.6	56038.3	0	0	0
evm.model.Chr1.1930_S329	AKLDGILQSSSPTRPSTSEAI	evm.model.Chr1.1930	LDGILQSSsPTR	0.972	0.965	0.968	0.965	0.952	0.972	0.968	1.46715e+06	1.45474e+06	1.4854e+06	1.665e+06	1.73895e+06	1873873
evm.model.Chr1.1943_S157	DDVGHGVKLSSQPNTGTMRRP	evm.model.Chr1.1943	LSsQPNTGTMR	0.957	0	0.957	0	0	0	0	36491.7	40301.7	0	0	39608.7	0
evm.model.Chr1.1943_S177	PSAVSTKKAPSPSEGGSKRDS	evm.model.Chr1.1943	KAPsPSEGGSK	0.969	0	0.966	0.954	0.969	0.969	0	0	15746.2	15137.1	0	22541.9	0
evm.model.Chr1.1943_S190	EGGSKRDSLKSNASGYGTLRP	evm.model.Chr1.1943	sNASGYGTLRPVK	0.951	0	0	0	0.951	0	0.571	0	0	77473.8	19259.8	0	99881.3
evm.model.Chr1.1943_S193	SKRDSLKSNASGYGTLRPVKA	evm.model.Chr1.1943	SNAsGYGTLRPVK	0.957	0.921	0.956	0.957	0	0.954	0	65131.2	40235.4	39913.3	83654.4	29674.9	0
evm.model.Chr1.1943_S371	PYMGTVGRVPSLPTTGFPAKI	evm.model.Chr1.1943	VPsLPTTGFPAK	0.97	0.946	0.969	0.967	0	0.97	0.968	69091.7	51689.2	566829	0	33238.2	19788.7
evm.model.Chr1.1951_S117	KKAKELESQNSSLNEQENDDV	evm.model.Chr1.1951	ELESQNsSLNEQENDDVEMK	0.885	0.784	0.885	0	0	0.483	0.49	115085	92308.6	149456	0	61895.1	63604.5
evm.model.Chr1.1951_S118	KAKELESQNSSLNEQENDDVE	evm.model.Chr1.1951	ELESQNSsLNEQENDDVEMK	0.962	0.962	0.956	0.944	0.932	0	0	89805.9	95121.6	219189	35693.3	0	0
evm.model.Chr1.1954_S351	DFPLSRPRSTSQPSLFINSTA	evm.model.Chr1.1954	STsQPSLFINSTAPLGQNSR	0.959	0.959	0	0.596	0	0	0	130350	78139.3	402348	0	0	0
evm.model.Chr1.1954_S699	QALPRICRSQSDPGSLNRAAG	evm.model.Chr1.1954	SQsDPGSLNR	0.972	0.965	0.965	0.967	0.967	0.969	0.972	1.01211e+06	933204	913401	1154871	1.08314e+06	1.0791e+06
evm.model.Chr1.1954_S711	PGSLNRAAGASNEDFFRLILP	evm.model.Chr1.1954	AAGAsNEDFFR	1	1	1	1	1	1	1	344476	353958	375224	264447	356515	350362
evm.model.Chr1.1954_S734	TRNQNTLTLVSP*********	evm.model.Chr1.1954	NQNTLTLVsP	0.97	0.966	0	0.965	0.97	0	0	19409.1	32853.1	77200.5	25984.2	27677	28045.2
evm.model.Chr1.1971_S56	IETNYDKIVDSFDDMNLKEEL	evm.model.Chr1.1971	IVDsFDDMNLK	1	1	1	1	1	1	1	73613.8	74317.5	106494	34701.1	44889.1	66933.9
evm.model.Chr1.1998_S59	QKLAQSKAVESPTNELRHAQS	evm.model.Chr1.1998	AVEsPTNELR	0.974	0.971	0.971	0.969	0.974	0.972	0.973	1.8154e+06	1.7811e+06	1495162	458666	2.22158e+06	2182055
evm.model.Chr1.2004_T296	DTEATKDEEKTPPPEADDSKK	evm.model.Chr1.2004	DEEKtPPPEADDSKK	0.968	0.957	0.907	0.968	0	0	0	37176.5	40311.1	32476.1	0	0	0
evm.model.Chr1.2004_T965	EPPPPEPFEFTE*********	evm.model.Chr1.2004	KEENDEEDEPPPPEPFEFtE	1	0	0	1	0	0	0	0	0	20814.6	0	0	0
evm.model.Chr1.2010_S241	CVSIVKEKPNSIYKPPKYEDI	evm.model.Chr1.2010	EKPNsIYKPPK	0.957	0	0.957	0	0	0	0	0	21531.8	39708.2	0	0	0
evm.model.Chr1.2010_T263	KVPLVDDMEETDSKPPPYAV*	evm.model.Chr1.2010	VPLVDDMEEtDSKPPPYAV	0.949	0	0	0.949	0	0	0	0	0	66180.4	0	0	0
evm.model.Chr1.2021_S373	LQGVLTHQGRSSSSGHYVSWI	evm.model.Chr1.2021	sSSSGHYVSWIR	0.964	0.964	0	0.466	0	0	0	73143.1	23504.9	41039.7	0	0	0
evm.model.Chr1.2045_S5	******MPFKSGSEEEQLRKL	evm.model.Chr1.2045	PFKsGSEEEQLR;PFKsGSEEEQLRK	0.967	0.965	0.949	0.915	0.945	0.963	0.967	113612	92186.5	95506.9	52697.9	57048	65014.4
evm.model.Chr1.2045_S7	****MPFKSGSEEEQLRKLFI	evm.model.Chr1.2045	SGsEEEQLR;SGsEEEQLRK	0.965	0.965	0.911	0.806	0.825	0.882	0.962	523654	531621	499337	523189	552270	470112
evm.model.Chr1.2045_S94	DVKRAVSREESAKPGAHFQVK	evm.model.Chr1.2045	EEsAKPGAHFQVK	1	1	1	1	0	0	0	50823	55595.1	43245.6	24262.1	0	30216.7
evm.model.Chr1.2046_S184	FYEERLTWHQSTNDDQN****	evm.model.Chr1.2046	LTWHQsTNDDQN	0.946	0	0	0.946	0.491	0.934	0.945	42274	36799	25975	36500.5	47438.8	33942.9
evm.model.Chr1.2048_T277	MTPWHSRFGGTFVHRGTKSIS	evm.model.Chr1.2048	FGGtFVHR	1	1	0	0	1	1	1	19457.1	27805.2	18554.8	31535.1	51656	42577.2
evm.model.Chr1.2056_S355	VATSSNPVSFSPPAVKPSSPP	evm.model.Chr1.2056	ENEATVATSSNPVSFsPPAVKPSSPPK	0.806	0	0	0.806	0	0	0	0	0	52548.9	0	0	0
evm.model.Chr1.2056_S362	VSFSPPAVKPSSPPKQQQSSL	evm.model.Chr1.2056	ENEATVATSSNPVSFSPPAVKPsSPPK	0.944	0.486	0.486	0.944	0	0	0	184968	57161.8	593952	0	0	0
evm.model.Chr1.2056_S363	SFSPPAVKPSSPPKQQQSSLE	evm.model.Chr1.2056	ENEATVATSSNPVSFSPPAVKPSsPPK	0.954	0	0	0.954	0	0	0	224003	0	579292	0	0	0
evm.model.Chr1.2068_S53	IDPNKKIDVGSFRVDPNGKTR	evm.model.Chr1.2068	IDVGsFR;KIDVGsFR	1	1	1	1	1	1	1	72811.1	91703.5	65440.8	89641.6	137188	143432
evm.model.Chr1.2074_S189	YIGGQLFKSMSETNEDNPHS*	evm.model.Chr1.2074	SMsETNEDNPHS	0.948	0.88	0.948	0.943	0	0	0	21376.6	24562.5	15773.7	0	20227.9	0
evm.model.Chr1.2075_S333	RSVEDTVSTSSGSSRSDIVRI	evm.model.Chr1.2075	SVEDTVSTSsGSSR;SVEDTVSTSsGSsR	0.945	0	0.872	0.945	0.819	0	0	489592	617922	555172	432600	340369	317194
evm.model.Chr1.2075_S336	EDTVSTSSGSSRSDIVRIEVE	evm.model.Chr1.2075	SVEDTVSTSSGSsR;SVEDTVSTSsGSsR	0.945	0	0.913	0.945	0	0	0	0	112246	62600	45304.2	45403.7	45134.9
evm.model.Chr1.2075_S348	SDIVRIEVETSSPSDENPSP*	evm.model.Chr1.2075	IEVETsSPsDENPSP	0.958	0	0.958	0	0	0	0	0	188032	0	0	0	0
evm.model.Chr1.2075_S349	DIVRIEVETSSPSDENPSP**	evm.model.Chr1.2075	IEVETSsPSDENPSP	0.955	0	0.938	0.955	0	0.928	0	42438.2	52350.7	78210.2	0	22998.6	0
evm.model.Chr1.2075_S351	VRIEVETSSPSDENPSP****	evm.model.Chr1.2075	IEVETSSPsDENPSP;IEVETSSPsDENPsP;IEVETsSPsDENPSP	0.96	0.788	0.96	0.95	0	0	0	659550	866585	1.11549e+06	258851	362095	374945
evm.model.Chr1.2075_S356	ETSSPSDENPSP*********	evm.model.Chr1.2075	IEVETSSPSDENPsP;IEVETSSPsDENPsP	0.972	0.954	0.961	0.968	0.972	0.961	0.937	129772	186963	302034	67742.6	79220.3	88730.3
evm.model.Chr1.209_T2	*********MTPTVQNSAQRS	evm.model.Chr1.209	tPTVQNSAQR	0.97	0	0	0	0.97	0	0	0	0	0	33344	0	0
evm.model.Chr1.2107_S2	*********MSEGGQDDAESS	evm.model.Chr1.2107	sEGGQDDAESSQGLAASR	0.967	0	0.967	0.962	0	0	0	26170.7	21520.9	25043.7	0	0	0
evm.model.Chr1.2107_T251	SSDTTHDDPTTPPAKRCRLDL	evm.model.Chr1.2107	IMGALPVPTLPSSDTTHDDPTtPPAK	0.95	0	0	0.95	0	0	0	0	0	9151.78	0	0	0
evm.model.Chr1.211_S230	AVCQRFGLEASMEDGSFRAYS	evm.model.Chr1.211	FGLEAsMEDGSFR	0.971	0	0	0	0.971	0	0	306524	0	408602	85994.2	0	0
evm.model.Chr1.2138_S75	EEKFGKPDIASDNEEDVISRI	evm.model.Chr1.2138	FGKPDIAsDNEEDVISR;PDIAsDNEEDVISR	0.971	0.967	0.971	0.964	0.966	0.966	0.877	1.00105e+06	492980	1994793	97823.1	37880.2	135329
evm.model.Chr1.2167_S310	KERKVISRVLSQTLFPEEKRK	evm.model.Chr1.2167	VLsQTLFPEEK	0.967	0.957	0.961	0.967	0.967	0.961	0.966	48567	37911.3	127671	21698.9	24506.9	29346.6
evm.model.Chr1.2194_T208	LPFRENQTIQTPDVEIKEENK	evm.model.Chr1.2194	ENQTIQtPDVEIK	0.963	0	0	0.963	0	0	0	0	37774.1	41525.2	0	0	34858.5
evm.model.Chr1.2220_S273	VPDKEKTEEVSSDEEVKQQRL	evm.model.Chr1.2220	EKTEEVssDEEVK;TEEVsSDEEVK;TEEVssDEEVK;TEEVssDEEVKQQR	0.968	0.961	0.962	0.968	0.868	0.888	0.968	112065	290556	316667	89609.8	51878.5	71221.7
evm.model.Chr1.2220_S274	PDKEKTEEVSSDEEVKQQRLE	evm.model.Chr1.2220	EKTEEVssDEEVK;TEEVSsDEEVK;TEEVssDEEVK;TEEVssDEEVKQQR	0.969	0.961	0.962	0.967	0.969	0.966	0.968	120720	307346	316667	148274	114652	127838
evm.model.Chr1.2255_S1670	SDKTVGGNDDSFNTFFSETGA	evm.model.Chr1.2255	TVGGNDDsFNTFFSETGAGK	0.946	0	0	0.946	0	0	0	0	0	10215.1	0	0	0
evm.model.Chr1.2255_T330	IVKLFLENPATPKLARTKNGL	evm.model.Chr1.2255	LFLENPAtPK	1	1	1	1	0	1	1	34084.4	38591.1	43179.5	29529.6	39585	35153.1
evm.model.Chr1.2271_S124	KEKPSVDPSTSAEEKSCEGKG	evm.model.Chr1.2271	EKPSVDPSTsAEEK	0.938	0	0	0.938	0	0	0.918	0	53701.8	47164.3	0	43952.3	29905.8
evm.model.Chr1.2271_S1517	HGKSSTSLLMSSDERDTDDEH	evm.model.Chr1.2271	SSTSLLMsSDER;SSTSLLMssDER	0.969	0.964	0.923	0.967	0.968	0.969	0.968	110072	104001	161698	125107	141123	117747
evm.model.Chr1.2271_S1518	GKSSTSLLMSSDERDTDDEHV	evm.model.Chr1.2271	SSTSLLMSsDER;SSTSLLMssDER	0.967	0.901	0	0.967	0.904	0.961	0.899	69492.8	28656	99952.8	73855.7	33199.5	73427.5
evm.model.Chr1.2271_S1568	AGGKRSSQKISPKLSKKIDPL	evm.model.Chr1.2271	SSQKIsPK	0.97	0.968	0.969	0.92	0.97	0.932	0.911	34690.1	32443.5	25197.9	50102.3	41179.8	28336.1
evm.model.Chr1.2271_S224	AKLKGRKRYQSPPNHPLYARK	evm.model.Chr1.2271	YQsPPNHPLYAR	0.969	0.965	0.941	0.962	0.969	0.969	0.965	521501	513990	524997	163017	304877	286172
evm.model.Chr1.2271_S686	KTLKQSSRGGSGGNVATWQWK	evm.model.Chr1.2271	GGsGGNVATWQWK	0.966	0	0	0.966	0	0	0	9059.71	0	10013.2	0	0	0
evm.model.Chr1.2271_S771	DQGKVMIKTESESSLTDARVS	evm.model.Chr1.2271	TEsESSLTDAR;TEsESsLTDAR	0.973	0.96	0.97	0.941	0.973	0.919	0.965	175265	190517	162861	169040	200236	151176
evm.model.Chr1.2271_S774	KVMIKTESESSLTDARVSLVK	evm.model.Chr1.2271	TESESsLTDAR;TEsESsLTDAR	0.966	0.897	0.966	0.954	0.956	0	0.957	112492	123842	116921	49375.1	96448.5	53713.8
evm.model.Chr1.2271_S960	PPRRSAGKRMSASSLASTPED	evm.model.Chr1.2271	MsASSLASTPEDTHR;RMsASSLASTPEDTHR	0.962	0.91	0.962	0.955	0	0	0	132506	121016	132246	39170.3	59668	80087.7
evm.model.Chr1.2271_S966	GKRMSASSLASTPEDTHRTRG	evm.model.Chr1.2271	MSASSLAstPEDTHR	0.924	0	0.924	0	0	0	0	24525.3	26746	34321.6	0	0	0
evm.model.Chr1.2271_S989	SASSPTDRVISPPLTKAKAFA	evm.model.Chr1.2271	VIsPPLTK	0.973	0.968	0.968	0.969	0.973	0.973	0.973	279909	163852	274280	239228	235413	333348
evm.model.Chr1.2271_T967	KRMSASSLASTPEDTHRTRGR	evm.model.Chr1.2271	MSASSLAStPEDTHR;MSASSLAstPEDTHR	0.96	0.958	0.916	0.96	0	0	0	74928.3	75490.5	81853.3	0	29563.7	35197
evm.model.Chr1.2273_S917	AEPATREATKSTEATSDDTLK	evm.model.Chr1.2273	EATKsTEATSDDTLK;sTEATSDDTLK	0.961	0.491	0.937	0.961	0.474	0.464	0.924	77688	71054.8	74337	80700	77460.8	73765
evm.model.Chr1.2273_S922	REATKSTEATSDDTLKSEAPT	evm.model.Chr1.2273	STEATsDDTLK	0.962	0.956	0	0.817	0.955	0.959	0.962	17140.2	18016.8	18424	23249.3	23506	0
evm.model.Chr1.2273_T393	QIQKYEIVNKTPPTPPANKVS	evm.model.Chr1.2273	YEIVNKtPPtPPANK	0.964	0.935	0.952	0.964	0	0	0	69848.9	51500.3	87583.2	0	0	0
evm.model.Chr1.2273_T396	KYEIVNKTPPTPPANKVSAGL	evm.model.Chr1.2273	TPPtPPANK;YEIVNKtPPtPPANK	0.969	0.969	0.953	0.964	0.966	0.902	0	108669	72675.8	215505	181762	81550.5	325268
evm.model.Chr1.2273_T915	ATAEPATREATKSTEATSDDT	evm.model.Chr1.2273	EAtKSTEATSDDTLK	0.935	0.935	0	0	0	0	0	49864.4	45380.8	0	0	0	0
evm.model.Chr1.2302_S294	KSTSEGLTPASERSRSKQWTT	evm.model.Chr1.2302	STSEGLTPAsER	0.967	0.967	0.862	0	0	0	0	15498.1	12594.6	11471.8	26425.5	0	38480
evm.model.Chr1.2302_S345	RFSSRSARRGSETPPHWREAQ	evm.model.Chr1.2302	RGsETPPHWR;RGsEtPPHWR	1	1	1	1	0	1	1	1.78095e+06	1.84566e+06	1.77401e+06	850592	1.09052e+06	1.05658e+06
evm.model.Chr1.2302_S380	EESSARWKQTSPSAMDRSSDN	evm.model.Chr1.2302	QTsPSAMDR	0.973	0.965	0.952	0.96	0.973	0.945	0.936	511404	442618	434417	565262	603278	538667
evm.model.Chr1.2302_S514	TGTRREKRRFSESKPDKTTEK	evm.model.Chr1.2302	FsESKPDK;RFsESKPDK	0.971	0.954	0.971	0.951	0.933	0.936	0.943	712160	761892	745733	616981	640358	384582
evm.model.Chr1.2302_S543	TTETGAAVEKSEKDDSSSDYS	evm.model.Chr1.2302	VDVSTTETGAAVEKsEK	0.967	0.963	0.967	0.96	0.963	0	0.964	65566.2	71495.6	62602.8	25385	29711.6	33506.8
evm.model.Chr1.2302_S773	QVPNDTEKNKSPSKPSVDKSE	evm.model.Chr1.2302	NKsPSKPSVDK;sPSKPSVDK	0.969	0.962	0.966	0.957	0.969	0.965	0.962	506382	480121	476383	453942	437525	333708
evm.model.Chr1.2302_T291	GTDKSTSEGLTPASERSRSKQ	evm.model.Chr1.2302	STSEGLtPASER	0.971	0	0	0.965	0.971	0.943	0.971	0	13312.3	16136.6	31718.5	34214.8	33378.6
evm.model.Chr1.2302_T347	SSRSARRGSETPPHWREAQRG	evm.model.Chr1.2302	GSEtPPHWR;RGsEtPPHWR	1	1	1	1	0.963	1	1	2138501	2.20058e+06	2.11218e+06	1.20654e+06	1.34314e+06	1.36287e+06
evm.model.Chr1.2305_S21	VVIGHVDSGKSTTTGHLIYKC	evm.model.Chr1.2305	sTTTGHLIYK	0.949	0.477	0	0.949	0	0.331	0.416	105995	91106.2	77362.2	0	138060	135592
evm.model.Chr1.2305_T23	IGHVDSGKSTTTGHLIYKCGG	evm.model.Chr1.2305	STtTGHLIYK	0.967	0.931	0.947	0.946	0.967	0	0	30568	87522.5	76042.2	102887	0	41120.9
evm.model.Chr1.2305_T24	GHVDSGKSTTTGHLIYKCGGI	evm.model.Chr1.2305	STTtGHLIYK	0.965	0	0	0.923	0.965	0	0	30302	0	23327.3	31740.2	27711.3	0
evm.model.Chr1.2324_S109	KDNGVVTEEGSDNGDSKDNAE	evm.model.Chr1.2324	DNGVVTEEGsDNGDSK;DNGVVTEEGsDNGDSKDNAEK	0.972	0.965	0.966	0.96	0.972	0.967	0.95	116452	149926	108382	57079.9	83320	80046.9
evm.model.Chr1.2324_S174	CAKDDTLEVDSSKEVVDEKNA	evm.model.Chr1.2324	DDTLEVDsSKEVVDEK	0.949	0.493	0.492	0.949	0	0	0	36862.1	0	68673.7	0	0	0
evm.model.Chr1.2324_S194	AVTEDIAKMDSVKEDEGKADL	evm.model.Chr1.2324	MDsVKEDEGK	1	1	1	1	0	0	0	10233.5	12466.1	10980.2	0	0	0
evm.model.Chr1.2324_S214	LAEEVADKEDSAKEDTVKADL	evm.model.Chr1.2324	ADLAEEVADKEDsAKEDTVK	0.944	0	0	0.944	0	0	0	0	0	80503.9	0	0	0
evm.model.Chr1.2324_T130	KVDLALNTGETDNEEGKDDAT	evm.model.Chr1.2324	VDLALNTGEtDNEEGKDDATK	0.95	0	0.939	0.948	0	0	0.95	403392	377768	624601	143191	29809.7	174258
evm.model.Chr1.2324_T140	TDNEEGKDDATKTDSAKDVTN	evm.model.Chr1.2324	VDLALNTGETDNEEGKDDAtK	0.924	0.924	0	0	0.493	0	0	93266.8	0	216061	32302.5	0	0
evm.model.Chr1.2330_S178	EEDGRKLFEISTEEPIKLWNA	evm.model.Chr1.2330	LFEIsTEEPIK	0.949	0	0	0.949	0	0	0	0	0	10980.7	0	0	0
evm.model.Chr1.2330_S885	RGPTTTPQGTSFKFDVNHSNN	evm.model.Chr1.2330	GPTTTPQGTsFK	0.944	0	0	0	0	0.944	0	0	0	0	0	50466.9	55436.8
evm.model.Chr1.2330_T880	RAAVPRGPTTTPQGTSFKFDV	evm.model.Chr1.2330	GPTTtPQGTSFK	0.967	0	0	0	0.966	0.967	0.904	108147	104777	95840.2	154615	132667	145488
evm.model.Chr1.2331_S111	SWRDEFLIQASPRDPENFPFV	evm.model.Chr1.2331	DEFLIQAsPR	1	1	1	1	0	0	0	18474.3	11725.1	23736.4	0	0	0
evm.model.Chr1.2332_T238	KQTQKLASGATLNRRFPLGTS	evm.model.Chr1.2332	LASGAtLNR	0.968	0.894	0	0.966	0.968	0.927	0	16093.8	0	12070	0	28397.1	0
evm.model.Chr1.2342_S263	LQAQLRTSEPSPSLNLFNRSN	evm.model.Chr1.2342	TSEPsPSLNLFNR	0.972	0.969	0.969	0.967	0.972	0.972	0.971	897826	754961	2.0063e+06	82768.4	204177	241726
evm.model.Chr1.2394_S146	DPDLPTETIASPTDPKKMKTS	evm.model.Chr1.2394	NDDDNVADPDLPTETIAsPTDPK	0.963	0.479	0	0.963	0	0	0	9644.71	0	41562.2	0	0	0
evm.model.Chr1.2394_S175	STGSNEYKDASDELSVTRMKR	evm.model.Chr1.2394	DAsDELSVTR	0.972	0.969	0.97	0.967	0.955	0.972	0.972	31216.4	28547.8	30383.4	50616.2	40024.8	42902
evm.model.Chr1.2394_S179	NEYKDASDELSVTRMKRKHKL	evm.model.Chr1.2394	DASDELsVTR	0.953	0	0.944	0.475	0.495	0.95	0.953	21347.4	17781.4	14438.4	33594	37051.8	38760.4
evm.model.Chr1.2394_S44	SSNPAHKLSESIEDTHFPDSK	evm.model.Chr1.2394	LSEsIEDTHFPDSK	0.941	0.934	0.577	0.941	0	0	0	344351	272683	460202	0	0	0
evm.model.Chr1.2394_S64	KESSGIDLNDSNEQNCKDSTA	evm.model.Chr1.2394	ESSGIDLNDsNEQNCK	0.966	0.95	0.827	0.966	0	0	0	15484.2	13148.2	11889.9	0	0	0
evm.model.Chr1.2394_S75	NEQNCKDSTASPLKVKDHCSG	evm.model.Chr1.2394	DSTAsPLK	0.973	0.949	0.953	0.96	0.973	0.959	0.947	26133.4	37097.1	39392.2	69776.9	74270.7	61812.7
evm.model.Chr1.2394_T125	KSANFLGGANTPDRNDDDNVA	evm.model.Chr1.2394	SANFLGGANtPDR	0.966	0.959	0.949	0.917	0.944	0.945	0.966	30798.9	37402.6	25883.7	29380.5	42088.6	43704.5
evm.model.Chr1.2394_T161	KKMKTSADIHTDDDSTGSNEY	evm.model.Chr1.2394	TSADIHtDDDSTGSNEYK	0.966	0.958	0	0.966	0.959	0	0.96	53792.7	54179.7	52470.6	27374.8	33573.8	36226.1
evm.model.Chr1.2396_S452	YRKRGFEEVMSPNIYNSKLFI	evm.model.Chr1.2396	GFEEVMsPNIYNSK	0.971	0	0.969	0.964	0	0.97	0.971	88257.8	57030.7	120159	19262.5	34557.5	38786.9
evm.model.Chr1.2396_S85	RTEKLSSHISSPGYKMEEANK	evm.model.Chr1.2396	LSSHISsPGYK	0.968	0.942	0.957	0	0.808	0.968	0.965	54326.3	63913.1	56345.9	56401.9	69122.3	76426.8
evm.model.Chr1.2396_T324	KVRILNEKVTTPTTTVYRCGP	evm.model.Chr1.2396	VTtPTTTVYR	0.967	0.965	0.954	0.963	0.959	0.967	0.965	41091	40916.3	38446.4	64934	52006.8	61534.9
evm.model.Chr1.2436_S104	TGPGGEPVKGSKYAADRRRFR	evm.model.Chr1.2436	GLPEAANVTGPGGEPVKGsK	0.962	0	0.962	0.959	0	0	0	15689.8	13510.9	16797.5	0	0	0
evm.model.Chr1.2436_S126	RYRPRPKERPSESNENPDEPS	evm.model.Chr1.2436	ERPsESNENPDEPSETGSPEGQENPR;ERPsESNENPDEPSETGSPEGQENPRPR;ERPsESNENPDEPSETGsPEGQENPR;ERPsESNENPDEPSETGsPEGQENPRPR	0.957	0.927	0.949	0.957	0	0.491	0.953	1.6097e+06	1.32531e+06	966068	0	310848	672866
evm.model.Chr1.2436_S128	RPRPKERPSESNENPDEPSET	evm.model.Chr1.2436	ERPSEsNENPDEPSETGSPEGQENPR	0.952	0	0	0.952	0	0	0	0	0	76125.9	0	52340.8	0
evm.model.Chr1.2436_S140	ENPDEPSETGSPEGQENPRPR	evm.model.Chr1.2436	ERPSESNENPDEPSETGsPEGQENPR;ERPSESNENPDEPSETGsPEGQENPRPR;ERPsESNENPDEPSETGsPEGQENPR;ERPsESNENPDEPSETGsPEGQENPRPR	0.969	0.969	0.965	0.964	0.967	0.969	0.969	3.11475e+06	2.50985e+06	3.21196e+06	135526	653989	1.02863e+06
evm.model.Chr1.2436_S171	RGPRKPMQEKSEGDEAEKPVN	evm.model.Chr1.2436	sEGDEAEKPVNGEHEGEERPEQR	1	0	1	1	0	0	0	0	37446.4	0	0	0	0
evm.model.Chr1.2436_S2	*********MSEQSEQPSQVV	evm.model.Chr1.2436	sEQSEQPSQVVER	0.972	0.938	0.952	0.962	0.958	0.971	0.972	524456	541950	481131	514757	587387	550155
evm.model.Chr1.2436_T138	SNENPDEPSETGSPEGQENPR	evm.model.Chr1.2436	ERPSESNENPDEPSEtGSPEGQENPRPR	0.924	0	0.924	0	0	0	0	1.95516e+06	1.51828e+06	2.09092e+06	0	0	0
evm.model.Chr1.2442_S94	KNLFKPHRYKSLVGIKVSRAI	evm.model.Chr1.2442	YKsLVGIK	0.969	0.947	0.969	0.693	0.671	0.865	0.969	51127.4	43371.7	68489.1	55980.1	80598.4	73172.5
evm.model.Chr1.2464_S2	*********MSQYSENTSGLV	evm.model.Chr1.2464	sQYSENTSGLVK	0.973	0.963	0	0.953	0.97	0.973	0.971	147663	160042	155960	188089	236317	219524
evm.model.Chr1.2521_S483	GGWYKAAKVDSPTVTTTLKNL	evm.model.Chr1.2521	VDsPTVTTTLK	0.973	0	0	0.968	0.973	0.97	0.97	280912	274484	254644	297559	305236	305706
evm.model.Chr1.2521_S570	RSGSFHRLRASLKRSSAKLVS	evm.model.Chr1.2521	LRAsLKR	1	0	0	0	0	0	1	0	80158.5	81389.8	0	0	60693
evm.model.Chr1.2521_S607	ATSSNMKRATSLGVLNSKFDG	evm.model.Chr1.2521	ATsLGVLNSK	0.972	0.96	0.97	0.924	0.971	0	0.972	197087	188290	180206	255877	255555	261409
evm.model.Chr1.2521_T525	RTGRQPSQSATPTGERAKDKA	evm.model.Chr1.2521	QPSQSAtPTGER	0.96	0	0.959	0.96	0	0	0	0	20042	16129.9	0	23340.4	0
evm.model.Chr1.2529_S39	DNKNKKKFKVSGFRKLMPTIP	evm.model.Chr1.2529	FKVsGFR	1	1	0	1	0	0	0	13573.6	0	0	0	0	0
evm.model.Chr1.2529_S598	ISQKPQHRFDSPVSMRGTEYV	evm.model.Chr1.2529	FDsPVSMR	0.973	0.97	0.97	0.968	0.973	0.972	0.972	76106.4	77796.9	79120.9	128801	131369	125552
evm.model.Chr1.2551_S126	TNVTQRTNPKSPIKDTSPLKR	evm.model.Chr1.2551	TNPKsPIK;TNPKsPIKDTSPLK;TNPKsPIKDTsPLK;TNPKsPIKDtSPLK;sPIKDTSPLK;sPIKDTsPLK;sPIKDTsPLKR	0.971	0.968	0.967	0.968	0.971	0.967	0.971	2.42557e+06	2319112	2.22436e+06	2.58904e+06	2.38335e+06	2.51183e+06
evm.model.Chr1.2551_S132	TNPKSPIKDTSPLKRSDAIST	evm.model.Chr1.2551	SPIKDTsPLK;SPIKDTsPLKR;TNPKsPIKDTsPLK;sPIKDTsPLK;sPIKDTsPLKR	0.968	0.968	0.967	0.957	0.951	0.941	0.964	2003396	1.98078e+06	1.80737e+06	1.89506e+06	1.79544e+06	1.83968e+06
evm.model.Chr1.2551_S191	PIFKDYQKHLSDIEDKYGSGS	evm.model.Chr1.2551	HLsDIEDK	1	1	1	1	1	1	1	104908	0	97391.8	101695	121453	108386
evm.model.Chr1.2551_T131	RTNPKSPIKDTSPLKRSDAIS	evm.model.Chr1.2551	SPIKDtSPLKR;TNPKsPIKDtSPLK	0.947	0.632	0.947	0.877	0.494	0	0.628	398833	370148	935117	71720.9	0	177602
evm.model.Chr1.2551_T349	QSKTTTDDDYTPPKNETQVVK	evm.model.Chr1.2551	TTTDDDYtPPKNETQVVK	0.962	0.962	0	0.957	0	0	0	349241	318902	449865	0	172414	154925
evm.model.Chr1.2551_Y348	TQSKTTTDDDYTPPKNETQVV	evm.model.Chr1.2551	TTTDDDyTPPKNETQVVK	0.935	0.935	0.476	0	0	0	0	271096	453823	306630	0	0	0
evm.model.Chr1.2554_T6	*****MQFGGTPQRRRNRRQM	evm.model.Chr1.2554	MQFGGtPQR	1	1	1	1	1	1	1	43337.2	35465.7	47445.6	35465.2	37587.8	50482.5
evm.model.Chr1.2681_S239	ATDVGYKDIASGDEEMLKEAV	evm.model.Chr1.2681	DIAsGDEEMLK	1	1	1	1	1	1	0	82003.6	73693	83851.1	51444.7	65067.2	37594.6
evm.model.Chr1.2681_S42	WKKLYNKIYKSVDEEEQRMEN	evm.model.Chr1.2681	IYKsVDEEEQR	0.965	0	0.965	0.931	0	0	0.938	0	38953.9	38760.5	0	41819.8	28957.5
evm.model.Chr1.2681_Y40	QEWKKLYNKIYKSVDEEEQRM	evm.model.Chr1.2681	IyKSVDEEEQR	0.942	0.942	0	0	0	0	0	28628	0	0	0	0	0
evm.model.Chr1.2683_S69	RKLFCSSKVVSLEELSPTVKG	evm.model.Chr1.2683	VVsLEELSPTVK	0.966	0	0	0.966	0	0	0	0	0	9330.45	0	0	0
evm.model.Chr1.2686_S83	SRSPSRKQTRSTTRESLDRKS	evm.model.Chr1.2686	sTTREsLDR;sTTREsLDRK	0.968	0.961	0.819	0.952	0.95	0.968	0.966	86582.6	297072	261780	257518	328035	263007
evm.model.Chr1.2686_S88	RKQTRSTTRESLDRKSRRINT	evm.model.Chr1.2686	STTREsLDR;STTREsLDRK;sTTREsLDR;sTTREsLDRK	0.968	0.961	0.95	0.951	0.95	0.968	0.966	841859	945968	889040	961796	1.01701e+06	814875
evm.model.Chr1.2688_T87	WKKLVSEPNSTPKKSEEKQEK	evm.model.Chr1.2688	KLVSEPNStPK;LVSEPNStPK	0.961	0.89	0.954	0	0.961	0.953	0	29683.2	27184.5	0	0	96745.3	0
evm.model.Chr1.2691_T562	AADMNASFYSTPKQSVATEGE	evm.model.Chr1.2691	GAADMNASFYStPK	0.944	0	0	0.944	0	0	0	0	0	10117.5	0	0	0
evm.model.Chr1.2705_S3	********MGSDSNLAIKDQA	evm.model.Chr1.2705	GsDSNLAIK;GsDSNLAIKDQAVK;GsDsNLAIK	1	0.5	0.958	1	0	0	0	1478639	1.36384e+06	1.46924e+06	2.87073e+06	1.59784e+06	2.4451e+06
evm.model.Chr1.2705_S5	******MGSDSNLAIKDQAVK	evm.model.Chr1.2705	GsDsNLAIK	1	0	0	1	0	0	0	0	0	17220.7	0	0	0
evm.model.Chr1.2731_S1035	ANSDSQNRAGSPAQFVHSRQH	evm.model.Chr1.2731	AGsPAQFVHSR	0.972	0	0.97	0.968	0	0.972	0	0	0	67909.9	0	106699	0
evm.model.Chr1.2731_S1073	SSSANLNRNNSSRLSPGLQRR	evm.model.Chr1.2731	NNsSRLsPGLQR	0.96	0	0	0.96	0	0.65	0	41751	42245.8	31931.3	37360.9	33366.8	37750.9
evm.model.Chr1.2731_S1077	NLNRNNSSRLSPGLQRRVLNP	evm.model.Chr1.2731	LsPGLQR;NNsSRLsPGLQR	1	1	1	1	1	1	1	907730	840498	830754	1.26485e+06	993173	1.62409e+06
evm.model.Chr1.2731_S1090	LQRRVLNPNDSMSSQSSSSGR	evm.model.Chr1.2731	VLNPNDsMSSQSSSSGR	0.954	0.954	0.831	0.484	0	0	0	19264.7	19211.6	14869	0	0	0
evm.model.Chr1.2731_S1271	QQQQPPLNRMSGTSFSSSYH*	evm.model.Chr1.2731	MsGTSFSSSYH	0.967	0.966	0.967	0.936	0	0	0	21546.4	19808.3	12346.4	0	0	0
evm.model.Chr1.2733_S2	*********MSETQDSESSTA	evm.model.Chr1.2733	sETQDSESSTAEK	0.921	0.481	0	0.921	0	0	0	5882.42	0	14031.2	0	0	0
evm.model.Chr1.2733_S33	DLESKRHRSSSHDAGYERGHH	evm.model.Chr1.2733	SSsHDAGYER	0.97	0.96	0.908	0.943	0.97	0.635	0.759	153468	155206	158254	201890	169243	134139
evm.model.Chr1.2734_S104	NSSLNLVGYDSEDDAEQVKRE	evm.model.Chr1.2734	TNSSLNLVGYDsEDDAEQVK	0.934	0	0	0.934	0	0	0	0	0	34101	0	0	0
evm.model.Chr1.2734_S219	KKDKKKSKHRSISPKMSSPTR	evm.model.Chr1.2734	HRsIsPK	1	1	1	1	1	0	0	60518.9	66616.8	77666.6	111182	0	0
evm.model.Chr1.2734_S221	DKKKSKHRSISPKMSSPTRRN	evm.model.Chr1.2734	HRsIsPK	1	1	1	1	1	0	0	60518.9	66616.8	77666.6	111182	0	0
evm.model.Chr1.2734_S248	TRSRRERVKDSDTDLKKGTEK	evm.model.Chr1.2734	VKDsDTDLK;VKDsDTDLKK	0.967	0.965	0.966	0.916	0.961	0.967	0.953	72214.6	82987	59692.2	45676.4	48257.9	23908.9
evm.model.Chr1.2734_S320	RMSGREAIHHSAHGIARHRSR	evm.model.Chr1.2734	EAIHHsAHGIAR	1	1	0	0	0	0	0	0	19318.3	9056.3	0	0	0
evm.model.Chr1.2734_S376	NNGHSRKRRKSTNDDKFKGSF	evm.model.Chr1.2734	sTNDDKFK	0.958	0.5	0.5	0.958	0	0.941	0.958	26512.7	32825.6	30535.6	0	44186.8	47871.2
evm.model.Chr1.2734_S79	KHKKHDSVKESDDESEDLPSK	evm.model.Chr1.2734	HDSVKEsDDEsEDLPSK;HDSVKEsDDEsEDLPSKR	0.955	0	0	0.955	0	0	0	0	0	69397.7	0	0	0
evm.model.Chr1.2734_S83	HDSVKESDDESEDLPSKRQKT	evm.model.Chr1.2734	ESDDEsEDLPSK;ESDDEsEDLPSKR;HDSVKEsDDEsEDLPSK;HDSVKEsDDEsEDLPSKR	0.968	0.958	0.968	0.961	0	0.699	0	158600	163174	193733	44197.7	92074.6	39553
evm.model.Chr1.2749_T174	IALATDILHKTPVKDSAAGNA	evm.model.Chr1.2749	tPVKDSAAGNAGVDVAQQR	0.965	0.965	0.959	0.946	0	0	0	36929.8	26652.3	33824.7	0	0	0
evm.model.Chr1.2749_T73	WDTAGQERFHTITTSYYRGAN	evm.model.Chr1.2749	FHtITTSYYR	0.962	0	0	0.962	0	0	0	0	0	42211.1	0	0	0
evm.model.Chr1.2750_S16	SKEKDNGGVTSVDGGTHYARD	evm.model.Chr1.2750	DNGGVTsVDGGTHYAR	0.961	0.945	0	0.961	0.956	0	0	152565	139913	141991	76259.9	95622.9	89999.8
evm.model.Chr1.2750_S82	SGMVPIKGMPSRPSMTGQAVR	evm.model.Chr1.2750	GMPsRPSMTGQAVR	0.951	0	0	0.951	0.935	0	0	25532.2	0	42472.6	0	0	0
evm.model.Chr1.2750_S85	VPIKGMPSRPSMTGQAVRYVA	evm.model.Chr1.2750	GMPSRPsMTGQAVR	0.946	0.946	0	0	0	0	0	157935	192238	214952	81261.7	159966	165435
evm.model.Chr1.2750_Y424	GLARLIVDDEYSARQGAKFPI	evm.model.Chr1.2750	LIVDDEySAR	0.957	0.957	0.5	0.943	0.5	0.86	0.95	128746	125674	126347	168848	183781	165389
evm.model.Chr1.2750_Y444	IKWTAPEAAMYGKFTIKSDVW	evm.model.Chr1.2750	WTAPEAAMyGK	0.963	0	0	0.963	0	0	0	0	0	10930.3	0	0	0
evm.model.Chr1.2750_Y93	RPSMTGQAVRYVALYDYDART	evm.model.Chr1.2750	yVALYDYDAR	0.968	0	0	0.968	0	0	0	0	0	24258.6	0	0	0
evm.model.Chr1.2750_Y97	TGQAVRYVALYDYDARTADDL	evm.model.Chr1.2750	YVALyDYDAR	0.966	0.962	0	0.966	0	0.961	0.965	17048.5	22862.1	18316.3	0	0	32054.1
evm.model.Chr1.2769_S420	FRNWMNSLGVSPRVNKFTRDL	evm.model.Chr1.2769	NWMNSLGVsPR	0.966	0	0	0.966	0	0	0	0	0	13303.2	0	0	0
evm.model.Chr1.276_S675	DDAGGKKKPPSEVSDSDASAV	evm.model.Chr1.276	KPPsEVSDSDASAVSESDESD;KPPsEVSDsDASAVSESDESD;KPPsEVsDSDASAVSESDESD	0.955	0	0	0.955	0	0	0.952	0	0	144655	0	0	50439.1
evm.model.Chr1.276_S678	GGKKKPPSEVSDSDASAVSES	evm.model.Chr1.276	KPPsEVsDSDASAVSESDESD	0.836	0	0	0.836	0	0	0	0	0	48275.2	0	0	0
evm.model.Chr1.276_S680	KKKPPSEVSDSDASAVSESDE	evm.model.Chr1.276	KPPsEVSDsDASAVSESDESD	0.951	0	0	0.948	0	0	0.951	0	0	51150	0	0	50439.1
evm.model.Chr1.276_T636	AKKSRPSKPTTPKSTKTSPTK	evm.model.Chr1.276	SRPSKPTtPK	0.948	0	0	0.948	0	0	0	174729	171677	174016	0	130078	0
evm.model.Chr1.2800_S153	GVDYELKTYVSDGDEEKIHKR	evm.model.Chr1.2800	TYVsDGDEEK	0.968	0.915	0.965	0.965	0.968	0.952	0.968	61669.2	54758.6	56202.9	58307.9	53140.7	51184.5
evm.model.Chr1.2800_S360	KPADVDPIIGSPVKTIADKPS	evm.model.Chr1.2800	PADVDPIIGsPVK	1	1	1	1	1	1	1	7.75258e+06	7.69968e+06	8332888	5726925	5.2386e+06	6893064
evm.model.Chr1.2804_S461	MRRHKDGNHHSPSVSHQRSQS	evm.model.Chr1.2804	DGNHHsPSVSHQR	0.964	0	0.531	0.964	0	0	0	0	21878.1	14216	0	0	0
evm.model.Chr1.2804_S495	EERSKKNRPESPVQQRIRSGS	evm.model.Chr1.2804	NRPEsPVQQR	1	1	1	1	1	1	1	498176	493327	487449	499543	491235	398040
evm.model.Chr1.2804_S505	SPVQQRIRSGSVQLTPPQGHS	evm.model.Chr1.2804	SGsVQLTPPQGHsPNR	0.95	0.894	0.95	0.944	0	0	0.665	0	123785	88492.3	0	97298.6	103714
evm.model.Chr1.2804_S515	SVQLTPPQGHSPNRSPALPRR	evm.model.Chr1.2804	SGSVQLTPPQGHsPNR;SGSVQLtPPQGHsPNR;SGsVQLTPPQGHsPNR	0.973	0.968	0.97	0.967	0.973	0.972	0.97	1.17534e+06	1133872	1.2196e+06	427089	591691	462066
evm.model.Chr1.2804_S537	PVIPVLAQERSNPDSPQHSRK	evm.model.Chr1.2804	sNPDSPQHSR;sNPDsPQHSR	0.966	0	0	0.966	0.966	0	0	0	0	10148.5	0	0	0
evm.model.Chr1.2804_S541	VLAQERSNPDSPQHSRKNSDF	evm.model.Chr1.2804	SNPDsPQHSR;sNPDsPQHSR	0.966	0	0	0.698	0.966	0.964	0.964	0	0	4515.89	63232	51420.1	47802
evm.model.Chr1.2804_S549	PDSPQHSRKNSDFAAAPSDLD	evm.model.Chr1.2804	KNsDFAAAPSDLDR;NsDFAAAPSDLDR	0.974	0.97	0.971	0.968	0.974	0.969	0.971	638293	29540.7	540715	287974	437925	454939
evm.model.Chr1.2804_S646	DNGGLSNQQSSWDRRAVSSVM	evm.model.Chr1.2804	DNGGLSNQQSsWDR;DNGGLSNQQSsWDRR	0.971	0.967	0.968	0.958	0.971	0.971	0.97	340925	332996	299661	185085	265673	252606
evm.model.Chr1.2804_T509	QRIRSGSVQLTPPQGHSPNRS	evm.model.Chr1.2804	SGSVQLtPPQGHSPNR;SGSVQLtPPQGHsPNR	0.967	0	0.874	0.967	0	0.753	0	389995	631335	395093	71217.6	333036	144826
evm.model.Chr1.2807_S24	QVAYRLARKASLSIPTRNVYP	evm.model.Chr1.2807	KAsLSIPTR	0.972	0.968	0.956	0.968	0.968	0.972	0.97	63263.5	64131.6	13000.9	73765.5	56587.5	61682.5
evm.model.Chr1.2838_S21	FADSTAHPFPSNSPPAKQRKT	evm.model.Chr1.2838	SSESNSSANFADSTAHPFPsNSPPAK	0.961	0.943	0.853	0.961	0.486	0.486	0.486	2.43325e+06	0	4290145	262545	324053	256209
evm.model.Chr1.2838_S23	DSTAHPFPSNSPPAKQRKTNH	evm.model.Chr1.2838	SSESNSSANFADSTAHPFPSNsPPAK	0.964	0.951	0.956	0.964	0	0.962	0	4886484	2.23016e+06	8735216	0	325970	283758
evm.model.Chr1.2838_S894	RFNDLKKLIPSPDSFKGFRMV	evm.model.Chr1.2838	LIPsPDSFK	0.966	0	0	0.966	0	0	0	0	32808.5	49792	0	0	0
evm.model.Chr1.2838_S897	DLKKLIPSPDSFKGFRMVPAD	evm.model.Chr1.2838	LIPSPDsFK	0.97	0.966	0.968	0	0	0	0.97	44175.9	40410.3	67456.8	0	61657.2	60577.3
evm.model.Chr1.2838_T658	YYGKPLLESGTLGTKGNIQVV	evm.model.Chr1.2838	PLLESGtLGTK	0.932	0	0	0.932	0	0	0	0	0	11113.6	0	0	0
evm.model.Chr1.2843_T180	MRADDAEDEDTDTNTVAGENA	evm.model.Chr1.2843	ADDAEDEDtDTNTVAGENAIDR	0.925	0.925	0	0.922	0	0	0	15867.2	0	17099.9	0	0	0
evm.model.Chr1.2846_S7	****MAVRRQSSGSGWPRYGQ	evm.model.Chr1.2846	QsSGSGWPR;RQsSGSGWPR;RQssGSGWPR	0.97	0.968	0.968	0.967	0.969	0.97	0.965	931618	686436	737310	585295	699615	634194
evm.model.Chr1.2846_S8	***MAVRRQSSGSGWPRYGQQ	evm.model.Chr1.2846	QSsGSGWPR;RQssGSGWPR	0.969	0.945	0.967	0.954	0.969	0	0.968	170576	117351	120747	176179	0	183526
evm.model.Chr1.2875_S442	CRGKNAAVPESPLGRDEQPHL	evm.model.Chr1.2875	NAAVPEsPLGR	1	1	1	1	1	1	1	851572	847933	776739	849541	852261	899763
evm.model.Chr1.2875_S739	VFVEKEGLDFSFDKSSTTSWL	evm.model.Chr1.2875	EGLDFsFDK	1	0	0	1	0	0	0	0	0	24398.9	0	0	0
evm.model.Chr1.2922_T548	NDIKIIPVFATTGQMSGLKSN	evm.model.Chr1.2922	IIPVFAtTGQMSGLK	0.964	0.951	0	0.964	0	0	0	13927.3	0	51682.2	0	0	0
evm.model.Chr1.2923_S1241	NITFNGARSRSVVLDTDMTRF	evm.model.Chr1.2923	sVVLDTDMTR	0.968	0.968	0.967	0.965	0	0	0	0	12683.3	0	0	0	0
evm.model.Chr1.2923_S1254	LDTDMTRFDYSMTPEASRASL	evm.model.Chr1.2923	FDYsMTPEASR	0.956	0	0	0.956	0	0	0	0	0	13081.6	0	0	0
evm.model.Chr1.2923_S1340	FAIDLRSSAPSFDYKVVCGNE	evm.model.Chr1.2923	SSAPsFDYK	0.963	0.963	0	0	0	0	0	16372.8	0	0	0	27632.1	0
evm.model.Chr1.2923_S1367	CLIRTQLDQTSLRWQSRVNTI	evm.model.Chr1.2923	TQLDQTsLR	0.959	0.919	0.954	0.875	0.959	0.938	0.949	100565	102137	83072.7	226669	154558	180860
evm.model.Chr1.2923_S154	EIEECIRLAMSETEQRGLKFY	evm.model.Chr1.2923	LAMsETEQR	0.968	0.965	0.968	0.929	0	0.968	0	18519.4	11502.2	23260.3	30742.9	25539	0
evm.model.Chr1.2923_S436	KAIVQPVEARSGSLVITTPER	evm.model.Chr1.2923	sGSLVITTPER	0.95	0	0.493	0.95	0.935	0	0	164872	166342	147291	170799	188649	263303
evm.model.Chr1.2923_S438	IVQPVEARSGSLVITTPERTC	evm.model.Chr1.2923	SGsLVITTPER	0.965	0.925	0	0	0	0.954	0.965	163271	166342	170737	162550	49721.3	225245
evm.model.Chr1.2923_S594	SGRIVSSNIISIKRNQAHRSE	evm.model.Chr1.2923	IVSSNIIsIK;IVSSNIIsIKR	0.968	0.939	0.965	0.965	0.965	0.967	0.968	25636.9	31410	59969.7	34113.8	36366.1	37213.3
evm.model.Chr1.2923_T689	YKTKISVNDITKTSFPYSRLS	evm.model.Chr1.2923	TKISVNDItK	0.825	0	0	0.678	0.808	0.592	0.825	0	37393.1	48270.1	31350.2	38228.7	42927
evm.model.Chr1.2924_S175	LHTKTTVNEVSVLGRGPVDQI	evm.model.Chr1.2924	TTVNEVsVLGR	0.969	0.954	0.969	0.967	0	0.917	0.969	18537.8	11756.8	14685.5	0	17208.7	16034.2
evm.model.Chr1.2932_S212	SNDYEDYLGDSD*********	evm.model.Chr1.2932	PKPVNVTSNDYEDYLGDsD;PVNVTSNDYEDYLGDsD	0.968	0.968	0.966	0.968	0	0	0	80285.2	53944.6	500396	0	0	0
evm.model.Chr1.2932_T6	*****MSGKPTPPKMAPKPGI	evm.model.Chr1.2932	SGKPtPPK	0.972	0.968	0.97	0.967	0.97	0.972	0.866	127123	52526.3	100077	142018	131231	89076.3
evm.model.Chr1.2957_S176	TNLNPELSNKSLDSINTDSVS	evm.model.Chr1.2957	sLDSINTDSVSDER;sLDsINTDSVSDER	0.969	0	0.969	0.964	0.918	0.954	0.96	127621	136645	176568	61366.9	96760.1	109757
evm.model.Chr1.2957_S179	NPELSNKSLDSINTDSVSDER	evm.model.Chr1.2957	SLDsINTDSVSDER;sLDsINTDSVSDER	0.968	0.963	0.968	0.966	0	0	0.968	22956.7	24142.4	57921.9	0	26943.9	29717.5
evm.model.Chr1.2957_S184	NKSLDSINTDSVSDERTNTEN	evm.model.Chr1.2957	SLDSINTDsVSDER	0.942	0	0.942	0	0	0.487	0	54565.9	44259.8	64271.2	26598	30740.8	61591.6
evm.model.Chr1.2961_S125	SAQASKRLKLSDSASTNKNEI	evm.model.Chr1.2961	LKLsDSASTNK	0.967	0.963	0.962	0.944	0.967	0.958	0.967	40758	34493.6	36901.6	43227.1	39025.1	48772.5
evm.model.Chr1.2961_S155	PSSDEKMEVVSDQNGQDDDEN	evm.model.Chr1.2961	MEVVsDQNGQDDDENNAEK	1	1	0	0	0	0	0	24039.6	22570.6	0	0	0	0
evm.model.Chr1.2961_S189	NNDELQSSTASPKSSPKPKDQ	evm.model.Chr1.2961	KLNNDELQSSTAsPK;LNNDELQSSTAsPK	0.971	0.967	0.968	0.962	0	0.971	0	379227	367325	356697	205247	233701	225516
evm.model.Chr1.2961_S39	TPKANSTQSLSPLKKSPSPKK	evm.model.Chr1.2961	ANSTQSLsPLK;ANSTQSLsPLKK;ANSTQSLsPLKKsPsPK	0.971	0.966	0.969	0.964	0.964	0.97	0.971	2.00863e+06	2.40875e+06	2.22104e+06	2.15882e+06	2207110	1.92939e+06
evm.model.Chr1.2961_S44	STQSLSPLKKSPSPKKVEEDS	evm.model.Chr1.2961	ANSTQSLSPLKKsPsPK;ANSTQSLsPLKKsPsPK	0.958	0.958	0	0.784	0	0	0.784	943196	549286	560704	238650	559395	307994
evm.model.Chr1.2961_S46	QSLSPLKKSPSPKKVEEDSPI	evm.model.Chr1.2961	ANSTQSLSPLKKSPsPK;ANSTQSLSPLKKsPsPK;ANSTQSLsPLKKsPsPK	0.958	0.958	0.807	0.784	0	0	0.784	943990	606030	560704	276164	559395	307994
evm.model.Chr1.2961_S54	SPSPKKVEEDSPIKVKKRKVK	evm.model.Chr1.2961	KVEEDsPIK;KVEEDsPIKVK;VEEDsPIKVK	1	1	1	1	1	1	1	858753	827349	682108	625282	588819	623527
evm.model.Chr1.2961_S68	VKKRKVKAIFSDSEDESAVSS	evm.model.Chr1.2961	AIFsDSEDESAVSSK;AIFsDsEDESAVSSK	0.972	0.969	0.97	0.965	0.972	0.971	0.969	1.62837e+06	2.44964e+06	2.81172e+06	547656	935113	1.0156e+06
evm.model.Chr1.2961_S70	KRKVKAIFSDSEDESAVSSKS	evm.model.Chr1.2961	AIFSDsEDESAVSSK;AIFsDsEDESAVSSK	0.973	0.969	0.97	0.966	0.973	0.971	0.972	1.73269e+06	2.54472e+06	2.90744e+06	736548	1.10007e+06	1177300
evm.model.Chr1.2961_S84	SAVSSKSESKSPVSQKKVNLK	evm.model.Chr1.2961	SESKsPVSQK	0.967	0.93	0.967	0.953	0.96	0	0.7	0	23212	24407.2	0	0	0
evm.model.Chr1.2976_S14	SKAQNKVADISLAEYGRKEIE	evm.model.Chr1.2976	VADIsLAEYGR	0.973	0.97	0.971	0.969	0.973	0.972	0.947	152466	161828	237041	82914	153152	159744
evm.model.Chr1.2985_S330	ASISSRTSLASDATSGDDLLR	evm.model.Chr1.2985	TSLAsDATSGDDLLR	0.963	0.963	0	0.963	0	0	0	9648.47	0	35881.2	0	0	0
evm.model.Chr1.2985_S334	SRTSLASDATSGDDLLRRSVN	evm.model.Chr1.2985	TSLASDATsGDDLLR	0.967	0.967	0.967	0.966	0	0.966	0.936	34134.9	46262.5	97719.3	11412.2	15794	28992.2
evm.model.Chr1.2985_S52	DEIKQDLEHESPGDGPPKSPF	evm.model.Chr1.2985	QDLEHEsPGDGPPK	1	0	0	1	0	0	0	0	0	15016.5	0	0	0
evm.model.Chr1.2994_T32	GKTTFVKRHLTGEFEKKYVAT	evm.model.Chr1.2994	HLtGEFEK	1	1	0	0	0	1	0	0	0	0	0	20152.6	0
evm.model.Chr1.3008_S112	DRADALQQGASQFETQAAKLK	evm.model.Chr1.3008	ADALQQGAsQFETQAAK	0.901	0.901	0.891	0.859	0	0	0	31892.6	29201.3	35173.7	0	0	0
evm.model.Chr1.3008_S98	DKVLERDQKLSELDDRADALQ	evm.model.Chr1.3008	DQKLsELDDR	1	1	1	1	1	1	1	92732.9	93081.4	85045.6	90043.6	75157.2	73091.9
evm.model.Chr1.3026_S557	DSNKEAIRHRSPSPPRYRGRG	evm.model.Chr1.3026	HRsPsPPR	1	1	1	1	1	0	0	307152	263608	326871	113452	232469	134145
evm.model.Chr1.3026_S559	NKEAIRHRSPSPPRYRGRGFY	evm.model.Chr1.3026	HRsPsPPR	1	1	1	1	1	0	0	307152	263608	326871	113452	232469	134145
evm.model.Chr1.3047_S472	IRLKKYRGMGSVDAMEGSKAS	evm.model.Chr1.3047	GMGsVDAMEGSK	0.966	0	0.966	0	0	0	0	14700.2	32442.6	25345.3	0	0	0
evm.model.Chr1.3048_S1148	LKSPPPVNGKSTPPDISSAVP	evm.model.Chr1.3048	sTPPDISSAVPLR	0.936	0.936	0.493	0.492	0.493	0.493	0.493	503444	494256	772968	174959	272764	302351
evm.model.Chr1.3048_S1165	SAVPLRTRGDSVAGDSIDAFG	evm.model.Chr1.3048	GDsVAGDSIDAFGDDDAR;GDsVAGDsIDAFGDDDAR;TRGDsVAGDSIDAFGDDDAR;TRGDsVAGDsIDAFGDDDAR	1	1	1	1	0.971	0.971	0.967	356695	247265	532035	26047.2	60448.3	57437
evm.model.Chr1.3048_S1170	RTRGDSVAGDSIDAFGDDDAR	evm.model.Chr1.3048	GDSVAGDsIDAFGDDDAR;GDsVAGDsIDAFGDDDAR;TRGDsVAGDsIDAFGDDDAR	1	1	1	1	0.969	0.971	0.956	216619	232351	399468	42920.4	78874.6	92622.2
evm.model.Chr1.3048_T1149	KSPPPVNGKSTPPDISSAVPL	evm.model.Chr1.3048	StPPDISSAVPLR	0.958	0.953	0	0.958	0	0	0.776	675993	489331	872689	177597	265546	328974
evm.model.Chr1.3054_S171	TDLLREGSPISPEPPFRHWRS	evm.model.Chr1.3054	EGSPIsPEPPFR	0.967	0	0.967	0	0	0	0	0	10291.9	14609.2	0	0	0
evm.model.Chr1.3058_S1165	DGVKRLATEFSPLDKTPEMVI	evm.model.Chr1.3058	LATEFsPLDK	0.967	0.967	0.924	0.963	0	0	0.96	16606.3	22245.9	21528.3	0	0	21850.5
evm.model.Chr1.3058_S4523	DVKTPEKRRESENSSSQEEPL	evm.model.Chr1.3058	REsENSSSQEEPLDLSAK	0.952	0	0.952	0	0	0	0	53530.4	47888.1	57502.6	0	0	0
evm.model.Chr1.3058_S4638	SNALRNQIPQSPASSATKRGR	evm.model.Chr1.3058	NQIPQsPASSATK	0.943	0	0	0.943	0	0	0.941	0	35525.9	51017.7	35006.1	0	29186.9
evm.model.Chr1.3058_S4653	ATKRGRPKKRSFGDVDSPGRF	evm.model.Chr1.3058	sFGDVDSPGR	0.974	0.965	0.97	0.969	0.974	0.973	0.972	62637.1	63753.2	56123	77755.2	60275.1	69175.3
evm.model.Chr1.3058_S4659	PKKRSFGDVDSPGRFNPNNQF	evm.model.Chr1.3058	SFGDVDsPGR	0.97	0.903	0.965	0.957	0.97	0.962	0.966	22933.1	18781.2	19587.9	43908.6	25871	45115.2
evm.model.Chr1.3058_S4841	YNNDAPISGNSPSRSHLPSFF	evm.model.Chr1.3058	NSPVSPYNNDAPISGNsPSR	0.931	0.923	0.489	0.931	0.486	0.485	0	125901	132433	140426	50886.3	99171.7	116050
evm.model.Chr1.3058_T4644	QIPQSPASSATKRGRPKKRSF	evm.model.Chr1.3058	NQIPQSPASSAtK	0.924	0	0	0	0.924	0	0	23978.5	0	26132.4	32365.6	45369.3	0
evm.model.Chr1.3075_S230	QETTPQPRKGSDASTSEIHST	evm.model.Chr1.3075	KGsDASTSEIHSTTPTFK	0.967	0.961	0.967	0.954	0	0	0.957	350941	312876	383456	17915.7	88276	163978
evm.model.Chr1.3075_T241	DASTSEIHSTTPTFKQKISEF	evm.model.Chr1.3075	GSDASTSEIHSTtPTFK	0.942	0.942	0.935	0	0	0	0	55116.3	57120	0	0	0	0
evm.model.Chr1.3075_T375	WTIDTQRLKLTLTGHGGKVLA	evm.model.Chr1.3075	LtLTGHGGK	0.94	0	0.94	0	0	0	0	0	78960.2	71914.9	102225	86562.6	0
evm.model.Chr1.3088_S217	DPDDRGGWGISPRGAGYTFGQ	evm.model.Chr1.3088	GGWGIsPR	1	1	1	1	0	0	1	25549.1	0	29414.2	0	0	26336.6
evm.model.Chr1.3088_S6	*****MEDTTSPPPPSNKDLD	evm.model.Chr1.3088	MEDTTsPPPPSNK	0.97	0.963	0.958	0.962	0.968	0.97	0.967	658597	562279	529727	320695	332021	544458
evm.model.Chr1.3088_T309	RRGEPHVTRRTPDYFL*****	evm.model.Chr1.3088	RtPDYFL	0.959	0	0	0.959	0	0	0	0	0	17289.5	0	0	0
evm.model.Chr1.3094_S1056	KEFVEDDQVHS**********	evm.model.Chr1.3094	EFVEDDQVHs	1	1	1	1	1	1	1	29502.7	31332.2	23899.9	53250.7	35952.4	33553.1
evm.model.Chr1.3094_S24	YRESTEIEPFSPRHNIIVGRN	evm.model.Chr1.3094	ESTEIEPFsPR	0.969	0.968	0.969	0.961	0	0	0	21755.1	20826.8	34582.3	0	0	0
evm.model.Chr1.311_S262	PRKQGKRDNDSADEHFSSREN	evm.model.Chr1.311	DNDsADEHFSSR;RDNDsADEHFSSR	0.97	0.969	0.97	0.967	0.97	0.969	0.97	173313	137116	124405	128540	159824	127499
evm.model.Chr1.311_S27	QVSKLQSEYASDTPLSSGGED	evm.model.Chr1.311	LQSEYAsDTPLSSGGEDDDVK	0.966	0.831	0.966	0.962	0	0.479	0	102418	95571.1	136806	0	30754.9	0
evm.model.Chr1.311_S289	KFINGRNVRHSTSPLVSPQGS	evm.model.Chr1.311	HsTsPLVSPQGSR;NVRHsTSPLVsPQGSR;NVRHsTsPLVSPQGSR;NVRHstSPLVSPQGSR	0.96	0.96	0.744	0.934	0	0.654	0	80134.2	157592	421080	0	21635	0
evm.model.Chr1.311_S291	INGRNVRHSTSPLVSPQGSRN	evm.model.Chr1.311	HSTsPLVSPQGSR;HSTsPLVsPQGSR;HsTsPLVSPQGSR;NVRHSTsPLVsPQGSR;NVRHsTsPLVSPQGSR	0.964	0.76	0.856	0.938	0.861	0.953	0.964	354484	408269	902506	263934	268232	275994
evm.model.Chr1.311_S295	NVRHSTSPLVSPQGSRNTSPE	evm.model.Chr1.311	HSTSPLVsPQGSR;HSTSPLVsPQGsR;HSTsPLVsPQGSR;HStSPLVsPQGSR;NVRHSTSPLVsPQGSR;NVRHSTsPLVsPQGSR;NVRHsTSPLVsPQGSR	0.967	0.936	0.967	0.782	0.677	0.793	0	1597271	1.54942e+06	1.71422e+06	1405110	1.47368e+06	1.42972e+06
evm.model.Chr1.311_S299	STSPLVSPQGSRNTSPERNIS	evm.model.Chr1.311	HSTSPLVSPQGsR;HSTSPLVsPQGsR	0.967	0	0.967	0.758	0	0	0	0	1126951	1.03131e+06	1.01095e+06	0	1.02062e+06
evm.model.Chr1.311_S32	QSEYASDTPLSSGGEDDDVKD	evm.model.Chr1.311	LQSEYASDTPLssGGEDDDVK	0.766	0	0	0.766	0	0	0	0	0	33796.6	0	0	0
evm.model.Chr1.311_S33	SEYASDTPLSSGGEDDDVKDL	evm.model.Chr1.311	LQSEYASDTPLSsGGEDDDVK;LQSEYASDTPLssGGEDDDVK	0.956	0.912	0	0.956	0	0	0	35595.5	0	77464.6	0	0	0
evm.model.Chr1.311_S403	RRQFVASQGNSPASTPGSSPM	evm.model.Chr1.311	QFVASQGNsPASTPGSSPMLGR	0.961	0	0	0.961	0	0	0	32121.8	28958.7	64384	0	0	0
evm.model.Chr1.311_S411	GNSPASTPGSSPMLGRKFQDG	evm.model.Chr1.311	QFVASQGNSPASTPGSsPMLGR	0.948	0	0	0.948	0	0	0	0	0	31724.6	0	0	0
evm.model.Chr1.311_T290	FINGRNVRHSTSPLVSPQGSR	evm.model.Chr1.311	HStSPLVsPQGSR;NVRHstSPLVSPQGSR	0.96	0.96	0.611	0.643	0.547	0.654	0	408803	409009	404469	359586	399494	424018
evm.model.Chr1.324_S184	LIVSQKQINDSNNDEEVKDGQ	evm.model.Chr1.324	QINDsNNDEEVK;QINDsNNDEEVKDGQPVDIVISSTNPAPNK	1	1	1	1	1	1	1	373840	299214	548779	341307	328188	323488
evm.model.Chr1.329_evm.model.Chr1.330_S955	SQNQLLTHSKSLQSEHIPKLL	evm.model.Chr1.329_evm.model.Chr1.330	sLQSEHIPK	0.971	0.967	0.969	0	0.971	0	0.967	34159.4	0	0	0	46364	32091
evm.model.Chr1.329_evm.model.Chr1.330_T1261	ANDLVGASRGTPSELAASSTN	evm.model.Chr1.329_evm.model.Chr1.330	GtPSELAASSTNYNDR	0.968	0.968	0.958	0.963	0	0	0.956	23596.8	24475.1	23814.3	13275.6	21277.9	18539
evm.model.Chr1.352_T971	ISIRGGGRNRTPPSGDADSIR	evm.model.Chr1.352	NRtPPSGDADSIR;NRtPPSGDADSIRK;tPPSGDADSIR	0.968	0	0.965	0.968	0	0	0	718253	705631	800865	475465	414356	516875
evm.model.Chr1.356_S223	YGPFRDAAQSSPSFGDRKCYQ	evm.model.Chr1.356	DAAQSsPSFGDR	0.971	0.969	0.964	0.967	0.952	0.971	0.971	229657	227311	191510	248079	223445	239749
evm.model.Chr1.358_S203	EMTSNQDGNDSDDFM******	evm.model.Chr1.358	LFDESEMTSNQDGNDsDDFM	0.968	0.968	0.966	0.968	0	0	0	88793.6	79688.9	320052	0	0	0
evm.model.Chr1.37_S16	NISPNKRKRKSSQDFEESNVK	evm.model.Chr1.37	RKssQDFEESNVK	0.967	0	0.967	0	0	0	0	52248	53155.3	0	0	26926.2	28089.2
evm.model.Chr1.37_S17	ISPNKRKRKSSQDFEESNVKR	evm.model.Chr1.37	KSsQDFEESNVK;RKssQDFEESNVK;SsQDFEESNVK	0.967	0	0.967	0	0	0	0.956	3.05042e+06	2.67018e+06	2.54926e+06	2.7565e+06	2.64314e+06	2.68675e+06
evm.model.Chr1.37_S8	***MNSSINISPNKRKRKSSQ	evm.model.Chr1.37	MNSSINIsPNK;MNSSINIsPNKR	0.97	0	0.97	0	0	0	0.97	1.44139e+06	1.31366e+06	1.58699e+06	414261	844072	920235
evm.model.Chr1.380_S260	HIQRDEEDEGSSYESKHSESA	evm.model.Chr1.380	DEEDEGsSYESK	0.931	0.931	0	0	0	0	0	7604.97	9318.09	0	0	0	0
evm.model.Chr1.380_S507	GSEEHKDAGMSGSDDEDHDED	evm.model.Chr1.380	DAGMsGSDDEDHDEDDEIELR;DAGMsGsDDEDHDEDDEIELR	1	0.964	1	1	0	0	0	291794	335245	598767	0	0	0
evm.model.Chr1.380_S509	EEHKDAGMSGSDDEDHDEDDE	evm.model.Chr1.380	DAGMSGsDDEDHDEDDEIELR;DAGMsGsDDEDHDEDDEIELR	1	0	1	1	0	0	0	0	126597	317252	0	0	0
evm.model.Chr1.380_S595	EDIKDMVSISSLDDNLSPNAA	evm.model.Chr1.380	DMVSISsLDDNLSPNAAEPDK	0.964	0	0	0.964	0	0	0	0	0	128151	0	0	0
evm.model.Chr1.380_S601	VSISSLDDNLSPNAAEPDKTI	evm.model.Chr1.380	DMVSISSLDDNLsPNAAEPDK	0.966	0	0	0.966	0	0	0	0	0	30131.9	0	0	0
evm.model.Chr1.380_S630	EEEGLSKFDQSTQEETDTKSE	evm.model.Chr1.380	FDQsTQEETDTK	0.965	0.94	0.961	0	0.954	0	0.965	19619.4	32929.3	32039.4	46855.7	45359.5	46080.2
evm.model.Chr1.380_S639	QSTQEETDTKSEEKISHDESV	evm.model.Chr1.380	FDQSTQEETDTKsEEK	0.968	0	0	0.96	0.958	0.968	0.966	185358	187831	171770	116266	134204	136301
evm.model.Chr1.380_S747	GRDTLPNFMLSPSTVGGEKSV	evm.model.Chr1.380	DTLPNFMLsPSTVGGEK	0.924	0	0	0.924	0	0	0	0	0	15108.9	0	0	0
evm.model.Chr1.380_S793	DLPYPPRSVKSPDLISSTSTQ	evm.model.Chr1.380	SVKsPDLISSTSTQEVEGAR;SVKsPDLISsTSTQEVEGAR;sPDLISSTSTQEVEGAR	0.973	0.969	0.97	0.967	0.973	0.97	0.97	1.88582e+06	1346260	3.70959e+06	466278	445041	596658
evm.model.Chr1.380_S799	RSVKSPDLISSTSTQEVEGAR	evm.model.Chr1.380	SVKsPDLISsTSTQEVEGAR	0.772	0	0	0.772	0	0	0	0	0	33872	0	0	0
evm.model.Chr1.380_T631	EEGLSKFDQSTQEETDTKSEE	evm.model.Chr1.380	FDQStQEETDTK	0.971	0	0	0.952	0	0.971	0.963	0	32054.9	27681.9	41262.6	40337.9	39232
evm.model.Chr1.380_T637	FDQSTQEETDTKSEEKISHDE	evm.model.Chr1.380	FDQSTQEETDtKSEEK	0.919	0.488	0.919	0	0	0	0	175421	183068	173775	0	0	0
evm.model.Chr1.395_S17	MGNSVHLREDSVEPSPPAKGV	evm.model.Chr1.395	EDsVEPSPPAK	0.974	0.97	0.961	0.969	0.974	0.973	0.972	147302	140877	109395	205707	176489	179198
evm.model.Chr1.418_S338	GILAEACRQDSTSGEDETHDS	evm.model.Chr1.418	QDsTSGEDETHDSFYAVK	0.96	0.729	0.96	0.957	0	0.475	0	405063	392841	446447	149351	234199	221221
evm.model.Chr1.426_S1151	QHLEMHMRNESPPLLGRDHLA	evm.model.Chr1.426	NEsPPLLGR	1	1	1	1	0	1	0	43615.8	38276.1	27177.7	0	48289.5	48246.4
evm.model.Chr1.426_S156	RDSQARLTISSPLEAHKANTF	evm.model.Chr1.426	LTISsPLEAHK	0.961	0	0	0.961	0	0	0	0	0	53059.6	0	0	0
evm.model.Chr1.433_S637	MIKDPEEVEDSDIEAVMDGSE	evm.model.Chr1.433	DPEEVEDsDIEAVMDGSESGASR;DPEEVEDsDIEAVMDGSESGAsR;DPEEVEDsDIEAVMDGsESGASR	0.966	0.835	0.952	0.966	0	0	0	95516.2	82502	334204	0	0	0
evm.model.Chr1.433_S646	DSDIEAVMDGSESGASRLSGK	evm.model.Chr1.433	DPEEVEDsDIEAVMDGsESGASR	0.959	0	0.952	0.959	0	0	0	0	27469	80427.5	0	0	0
evm.model.Chr1.433_S651	AVMDGSESGASRLSGKTVETE	evm.model.Chr1.433	DPEEVEDsDIEAVMDGSESGAsR	0.94	0	0	0.94	0	0	0	0	0	83357.8	0	0	0
evm.model.Chr1.433_S662	RLSGKTVETESGPTDQTMMRR	evm.model.Chr1.433	TVETEsGPTDQTMMR	0.963	0.963	0	0.891	0	0	0	18099.3	24402	30830.3	0	0	0
evm.model.Chr1.433_T657	ESGASRLSGKTVETESGPTDQ	evm.model.Chr1.433	tVETESGPTDQTMMR	0.958	0.664	0.417	0	0	0	0.958	75048.6	26757.7	65430.5	38083	38907.3	84575.1
evm.model.Chr1.433_T660	ASRLSGKTVETESGPTDQTMM	evm.model.Chr1.433	TVEtESGPTDQTMMR	0.938	0	0	0	0	0.938	0	0	0	0	0	34079.1	0
evm.model.Chr1.433_T668	VETESGPTDQTMMRRLPEAEK	evm.model.Chr1.433	TVETESGPTDQtMMR	0.967	0.965	0.939	0.922	0	0.967	0	83894.6	70500.8	71172.5	49003.7	58594.8	44595.3
evm.model.Chr1.437_S1235	LRDMLRQREDSLGEAGNLQKF	evm.model.Chr1.437	QREDsLGEAGNLQK	1	0	0	1	0	0	0	0	28432.6	32940.9	0	0	0
evm.model.Chr1.437_S2236	IRDMPVDTCRSADDADQLLRR	evm.model.Chr1.437	sADDADQLLR	1	0	1	1	0	0	0	0	0	5496.37	0	0	0
evm.model.Chr1.451_S395	EGEEFRLQSVSPGLNTSGTTY	evm.model.Chr1.451	LQSVsPGLNTSGTTYSLR	0.969	0.944	0.969	0.968	0	0	0	94084.9	56307.8	263650	0	12031.8	0
evm.model.Chr1.451_T400	RLQSVSPGLNTSGTTYSLRKV	evm.model.Chr1.451	LQSVSPGLNtSGTTYSLR	0.868	0	0	0.868	0	0	0	0	0	34501.5	0	0	0
evm.model.Chr1.45_T149	PGEGTVTIKFTPTKGEPQEFK	evm.model.Chr1.45	FtPTKGEPQEFK	0.963	0	0	0.963	0	0	0	169333	0	175292	0	0	0
evm.model.Chr1.469_S435	RNISIFLKDESEEESEEEESA	evm.model.Chr1.469	DEsEEEsEEEESANVLLGR	0.966	0	0	0.966	0	0	0	0	0	74461.6	0	0	0
evm.model.Chr1.469_S439	IFLKDESEEESEEEESANVLL	evm.model.Chr1.469	DEsEEEsEEEESANVLLGR	0.966	0	0	0.966	0	0	0	0	0	74461.6	0	0	0
evm.model.Chr1.469_T1010	ENKNEEEPVPTPRKRKRDHSG	evm.model.Chr1.469	ADENKNEEEPVPtPR;NEEEPVPtPR	1	1	0	0	0	1	0	48234.9	0	0	0	118087	0
evm.model.Chr1.470_S224	FDEGRADYDGSMEDEEALTKF	evm.model.Chr1.470	ADYDGsMEDEEALTK	0.967	0.958	0.966	0.967	0	0	0	15577.2	21001.4	20789.5	0	0	0
evm.model.Chr1.490_S88	VATDSRATAGSYIASQTVKKV	evm.model.Chr1.490	ATAGsYIASQTVK	0.969	0.963	0.959	0.949	0.96	0.96	0.969	32392.8	80050.1	79844.7	80173	103371	124548
evm.model.Chr1.508_S328	TWPITGGQNLSPKSVVTRNVL	evm.model.Chr1.508	STSTWPITGGQNLsPK	0.968	0.968	0.968	0.964	0	0	0	25092.4	21082.7	25497.3	0	0	0
evm.model.Chr1.508_S548	NFSRVKSFKMSLRQSMRRLRG	evm.model.Chr1.508	MsLRQsMR	1	1	0	0	0	0	0	23790.9	21068.3	0	0	0	0
evm.model.Chr1.508_S552	VKSFKMSLRQSMRRLRGSFGG	evm.model.Chr1.508	MsLRQsMR	1	1	0	0	0	0	0	23790.9	21068.3	0	0	0	0
evm.model.Chr1.508_S559	LRQSMRRLRGSFGGGGSKRRR	evm.model.Chr1.508	LRGsFGGGGSK;LRGsFGGGGsK	1	1	1	1	1	1	1	689124	703932	594812	707780	645047	615249
evm.model.Chr1.508_S565	RLRGSFGGGGSKRRRGSRRRY	evm.model.Chr1.508	LRGsFGGGGsK	1	1	1	1	1	1	1	205685	218610	204046	272446	250440	223567
evm.model.Chr1.508_S604	EEETASASGWSPAATGQRRVE	evm.model.Chr1.508	ALVDEEETASASGWsPAATGQR	0.962	0.953	0	0.962	0	0	0	31465.6	0	132092	0	0	0
evm.model.Chr1.508_S758	RKFKLTAVDGSLIRKVAFAKF	evm.model.Chr1.508	LTAVDGsLIR	0.971	0.965	0.887	0.878	0.951	0.971	0.971	31945.6	21741.4	34698.1	19851.2	23508.1	30208.4
evm.model.Chr1.508_S907	GAAVVATKPTSPKTPLLGDSD	evm.model.Chr1.508	GAGGAAVVATKPTsPK	0.967	0.967	0.506	0.946	0.91	0.963	0.933	1478121	1500150	1.47989e+06	724697	794523	861858
evm.model.Chr1.508_S916	TSPKTPLLGDSDEDEEDDDRH	evm.model.Chr1.508	TPLLGDsDEDEEDDDR	0.971	0.97	0.97	0.967	0.97	0.946	0.971	293292	310120	338374	188254	255671	247252
evm.model.Chr1.539_T159	WTGLTDMYCKTPMGVTAENLA	evm.model.Chr1.539	tPMGVTAENLAEK	0.963	0.963	0	0	0	0	0	66359.2	0	59639	0	0	0
evm.model.Chr1.539_T179	AEKYGITREDTDSYALLTQQR	evm.model.Chr1.539	EDtDSYALLTQQR	0.969	0	0.479	0.936	0	0	0.969	0	14805.1	27413.8	0	0	24267.3
evm.model.Chr1.547_S275	QLAKIEADQVSDDPWVKMTIP	evm.model.Chr1.547	IEADQVsDDPWVK	1	1	1	1	0	0	0	0	5185.68	11459.1	0	0	0
evm.model.Chr1.547_S289	WVKMTIPKSVSAPNTPIHPER	evm.model.Chr1.547	SVsAPNTPIHPER	0.966	0.961	0.958	0.963	0	0.966	0.965	87886.8	19486.2	77258.3	0	122118	120831
evm.model.Chr1.558_S440	TKMQRINRAGSSTSITWGGKS	evm.model.Chr1.558	AGsSTSITWGGK	0.972	0.968	0.97	0.965	0	0.972	0.97	250510	237894	239186	390486	348622	402806
evm.model.Chr1.573_S147	DEEKLELQEVSLNEAKSVAED	evm.model.Chr1.573	LELQEVsLNEAK	1	0	0	1	0	0	0	0	0	3129.56	0	0	0
evm.model.Chr1.581_S121	SIEENNTAAKSVQEDIMSKNS	evm.model.Chr1.581	sVQEDIMSK	0.971	0	0.969	0.968	0.971	0.934	0	0	15045.5	17477.4	38145	23240.7	24665.8
evm.model.Chr1.581_S175	VGETKDSDHISGVGEEKARGE	evm.model.Chr1.581	DSDHIsGVGEEK	0.971	0.77	0.962	0.954	0.971	0.818	0.967	59213.9	52776.4	37045.3	45264.5	55488	37062.3
evm.model.Chr1.581_S243	NLQEVIKVDTSPSKNHEIQPE	evm.model.Chr1.581	VDTsPSKNHEIQPENDLNR	0.962	0.962	0.953	0.815	0	0	0	220725	161770	259848	0	27788.8	35631.9
evm.model.Chr1.581_S261	QPENDLNRSESQSENDAIQHD	evm.model.Chr1.581	SEsQSENDAIQHDK	0.966	0.937	0.966	0.965	0.941	0.962	0.911	76919.8	82654.4	76626.8	50212.1	59870.1	63434.8
evm.model.Chr1.581_S263	ENDLNRSESQSENDAIQHDKN	evm.model.Chr1.581	SESQsENDAIQHDK	0.96	0.9	0.959	0	0.96	0.956	0.96	53306.9	44124.9	39012.3	29853.5	33047.2	25531
evm.model.Chr1.581_S314	DLIDVKTGDESDGEIVDSDED	evm.model.Chr1.581	TGDEsDGEIVDSDEDENKDEK;TGDEsDGEIVDsDEDENK;TGDEsDGEIVDsDEDENKDEK	0.966	0.963	0.966	0.72	0	0.931	0	257405	418686	463020	0	85830.6	78422.4
evm.model.Chr1.581_S321	GDESDGEIVDSDEDENKDEKA	evm.model.Chr1.581	TGDESDGEIVDsDEDENK;TGDESDGEIVDsDEDENKDEK;TGDEsDGEIVDsDEDENK;TGDEsDGEIVDsDEDENKDEK	0.967	0.963	0.967	0.963	0	0	0	205207	371140	416495	0	34925.1	0
evm.model.Chr1.581_S41	KEAHLDEEAVSPLNGESVNSE	evm.model.Chr1.581	EAHLDEEAVsPLNGESVNSEEGNGQSVK	0.951	0	0	0.951	0	0	0	0	0	48039.5	0	0	0
evm.model.Chr1.581_S474	LFAERNPLPPSPPRGPPPFDP	evm.model.Chr1.581	NPLPPsPPR	1	1	1	1	1	1	1	2.60801e+06	4339637	8794836	4638514	3.05283e+06	4.82854e+06
evm.model.Chr1.581_S598	RFDSKSHDDRSPPRRPGEGHR	evm.model.Chr1.581	SHDDRsPPR	0.97	0.941	0.97	0.967	0.956	0.88	0.936	172538	200504	189609	192570	166804	130627
evm.model.Chr1.581_S612	RPGEGHRRPDSPPPRGRDLPP	evm.model.Chr1.581	RPDsPPPR	1	1	1	1	1	1	1	470644	628183	450218	749892	458589	421248
evm.model.Chr1.581_S714	QRRMMDDRRLSPGQQRREVES	evm.model.Chr1.581	LsPGQQR;RLsPGQQR	1	1	1	1	1	1	1	865236	827866	827586	883860	913381	668673
evm.model.Chr1.581_S74	PNVEFEEKKQSPTPISPTPSD	evm.model.Chr1.581	KQsPTPISPTPSDLEK;KQsPTPISPTPsDLEK;KQsPTPIsPTPSDLEK;KQsPTPIsPTPsDLEK	0.964	0.959	0.919	0.964	0.667	0.961	0.941	212356	227756	192582	57065.7	95693.3	110936
evm.model.Chr1.581_S742	PGGPGNQYHKSPHPPIAGGSS	evm.model.Chr1.581	sPHPPIAGGSSGAPR	0.972	0.969	0	0.967	0.97	0.972	0	108837	122635	77120.4	105534	144130	137269
evm.model.Chr1.581_S79	EEKKQSPTPISPTPSDLEKEN	evm.model.Chr1.581	KQSPtPIsPTPsDLEK;KQsPTPIsPTPSDLEK;KQsPTPIsPTPsDLEK;QSPTPIsPTPSDLEK;QSPTPIsPTPsDLEK	0.969	0.957	0.968	0.958	0.583	0.969	0.96	225728	258402	163423	42381.2	94089.8	82052.9
evm.model.Chr1.581_S83	QSPTPISPTPSDLEKENETVE	evm.model.Chr1.581	KQSPtPIsPTPsDLEK;KQsPTPISPTPsDLEK;KQsPTPIsPTPsDLEK;QSPTPIsPTPsDLEK	0.958	0.957	0.947	0.958	0	0	0.942	176879	165616	167249	14684.4	0	79391.5
evm.model.Chr1.581_T310	IGEPDLIDVKTGDESDGEIVD	evm.model.Chr1.581	tGDESDGEIVDSDEDENKDEK	0.93	0.49	0.494	0.93	0	0	0	110757	112566	108064	0	0	0
evm.model.Chr1.581_T76	VEFEEKKQSPTPISPTPSDLE	evm.model.Chr1.581	KQSPtPIsPTPsDLEK	0.759	0	0.759	0	0	0	0	67907.7	70891.9	0	0	0	0
evm.model.Chr1.600_S22	FSQSKYNSDASDNVNTNNAKV	evm.model.Chr1.600	yNSDAsDNVNTNNAK	0.951	0	0.719	0.951	0	0	0	0	22224.2	17849.5	0	0	0
evm.model.Chr1.600_S547	KMYERMFGSKSPTPKPEPKSS	evm.model.Chr1.600	sPTPKPEPK	0.973	0.97	0.97	0.968	0.973	0.971	0.971	294346	294237	286845	304268	340955	257108
evm.model.Chr1.600_Y17	SSEQLFSQSKYNSDASDNVNT	evm.model.Chr1.600	yNSDAsDNVNTNNAK	0.951	0	0.628	0.951	0	0	0	0	22224.2	17849.5	0	0	0
evm.model.Chr1.617.1_S1124	SSRGGAPAHQSDDGWTKVGVA	evm.model.Chr1.617.1	GGAPAHQsDDGWTK	0.944	0.801	0.593	0.944	0	0	0	29869.7	25548.2	27644.5	0	0	0
evm.model.Chr1.617.1_S1197	TRDTEPAPRSSTPTMINRFSA	evm.model.Chr1.617.1	SsTPTMINR	0.95	0	0	0	0.95	0	0	0	0	0	213113	0	0
evm.model.Chr1.617.1_S1217	ALGNQPQESTSPFQQRRASGR	evm.model.Chr1.617.1	FSALGNQPQESTsPFQQR	0.938	0.93	0.913	0.938	0	0	0	58687.6	30450	84741.5	0	0	0
evm.model.Chr1.617.1_S1236	GRQSSREGTKSGSRGSMGPPA	evm.model.Chr1.617.1	sGsRGSMGPPAAPYR	0.783	0.708	0.783	0	0	0	0.658	54324.3	49534.9	52186.7	0	0	81485.9
evm.model.Chr1.617.1_S1238	QSSREGTKSGSRGSMGPPAAP	evm.model.Chr1.617.1	SGsRGsMGPPAAPYR;sGsRGSMGPPAAPYR	0.851	0.632	0.783	0	0	0.851	0.658	142817	105502	52186.7	0	103805	245764
evm.model.Chr1.617.1_S1241	REGTKSGSRGSMGPPAAPYRG	evm.model.Chr1.617.1	GsMGPPAAPYR;SGsRGsMGPPAAPYR	0.974	0.97	0.971	0	0.974	0.973	0.973	232121	189337	130270	217305	314510	408539
evm.model.Chr1.617.1_S1267	ALLDAARKLTSQEEKKRGTSP	evm.model.Chr1.617.1	KLTsQEEK	0.969	0.966	0.928	0.966	0.948	0.969	0.961	56113.2	64802.7	59604.8	217739	140501	121787
evm.model.Chr1.617.1_S1287	PSVKSSPRSESPITPAPQMDV	evm.model.Chr1.617.1	SEsPITPAPQMDVAFLEK	0.965	0.95	0.764	0.965	0	0	0	76044.6	24477.2	302769	0	0	0
evm.model.Chr1.617.1_S398	YPVVTHAPAASPQDVPAKIPT	evm.model.Chr1.617.1	AYPVVTHAPAAsPQDVPAK	0.969	0.968	0.967	0	0	0.969	0.963	139397	97439.8	188125	0	49595.2	27835.3
evm.model.Chr1.617.1_S420	QVRPQVQKTTSPDVAPQITPI	evm.model.Chr1.617.1	TTsPDVAPQITPIVSK	0.97	0.968	0.97	0.967	0.97	0.97	0.97	976835	843855	1.53491e+06	311448	493237	710870
evm.model.Chr1.617.1_S573	PTPSITVTEASPVVQKMDGGK	evm.model.Chr1.617.1	IEPTPSITVTEAsPVVQK	0.958	0.954	0.927	0.958	0	0	0.554	89657.9	52790.1	222114	0	11165	20337.1
evm.model.Chr1.617.1_T1198	RDTEPAPRSSTPTMINRFSAL	evm.model.Chr1.617.1	SStPTMINR	0.968	0	0	0.949	0.968	0.968	0	487965	477784	476920	931471	812485	820174
evm.model.Chr1.617.1_T841	RNVRSILNKLTPQKFNPLMKR	evm.model.Chr1.617.1	SILNKLtPQK	0.971	0.968	0.97	0.967	0	0.97	0.971	49053.3	48948.7	54393.7	31248.4	43010.4	44915.8
evm.model.Chr1.625_S240	FQRLHLVAQKSKDENVAFIEP	evm.model.Chr1.625	sKDENVAFIEPR	1	1	1	1	1	1	1	843039	3.84897e+06	153571	3.87113e+06	191608	6243187
evm.model.Chr1.629_S124	EANKTEADNVSLRRHGSLMSL	evm.model.Chr1.629	TEADNVsLR;TEADNVsLRR	0.973	0.969	0.971	0.962	0.971	0.973	0.965	1.45277e+06	1.32412e+06	1227381	1.66345e+06	1.50086e+06	1.63312e+06
evm.model.Chr1.629_S139	GSLMSLGSAPSITSSSSFRKG	evm.model.Chr1.629	HGSLMSLGSAPsITSSSSFR	0.757	0	0	0.757	0	0	0	0	0	11321.1	0	0	0
evm.model.Chr1.645_S227	TSENGVSEKPSNLTLRMIYLH	evm.model.Chr1.645	VEEDETTKNGTSENGVSEKPsNLtLR	0.786	0	0.786	0	0	0	0	0	35203.8	0	0	0	0
evm.model.Chr1.645_S436	EFVSEIEKGKSKENLLMDGTT	evm.model.Chr1.645	GKsKENLLMDGTTK;sKENLLMDGTTK	0.97	0	0.97	0.966	0.964	0	0	242134	219767	241205	127423	164640	149637
evm.model.Chr1.645_S463	GESEPQFLEVSPPTSPKEKVE	evm.model.Chr1.645	IEVASGESEPQFLEVsPPTSPK	0.963	0	0	0.963	0	0	0	0	0	31755.8	0	0	0
evm.model.Chr1.645_S530	KVNRDALKKNSPDINRKGESE	evm.model.Chr1.645	KNsPDINR;KNsPDINRK	1	1	0	1	1	0	0	111163	100739	101795	111065	140473	0
evm.model.Chr1.645_S591	GSKLNENRPKSNEPDGELAKK	evm.model.Chr1.645	sNEPDGELAK	1	1	1	1	1	1	1	200265	202164	191430	164084	250538	177466
evm.model.Chr1.645_S617	EKRAERMKRVSVHKEEEAKRK	evm.model.Chr1.645	RVsVHKEEEAK;VsVHKEEEAK	1	1	1	1	0	0	0	74931.9	144893	232771	31553.3	54864.1	47326.5
evm.model.Chr1.645_T230	NGVSEKPSNLTLRMIYLHETG	evm.model.Chr1.645	VEEDETTKNGTSENGVSEKPsNLtLR	0.786	0	0.786	0	0	0	0	0	35203.8	0	0	0	0
evm.model.Chr1.64_S279	SSQHQSAKPNSPSPLISFNKS	evm.model.Chr1.64	PNsPSPLISFNK;SSQHQSAKPNsPSPLISFNK	0.97	0	0.97	0	0	0	0	108141	149966	252555	62757.8	93854.2	0
evm.model.Chr1.666_S219	EFLGRKTGEISPGEPEPFRLA	evm.model.Chr1.666	TGEIsPGEPEPFR	0.968	0.958	0	0.968	0	0.965	0.966	49125.8	0	44733.7	0	43057.2	55330.4
evm.model.Chr1.666_S582	NQPRMENETVSPRLFECSDAS	evm.model.Chr1.666	MENETVsPR	0.932	0.932	0	0	0	0	0	10704.5	18690.9	17412.7	0	0	0
evm.model.Chr1.679_S203	DFPGELMDRLSLDGSEPDDEN	evm.model.Chr1.679	LsLDGSEPDDENDR;LsLDGsEPDDENDR	1	1	1	1	1	1	1	378907	474864	424833	368980	416247	438543
evm.model.Chr1.679_S207	ELMDRLSLDGSEPDDENDRVY	evm.model.Chr1.679	LSLDGsEPDDENDR;LsLDGsEPDDENDR	1	1	1	1	1	1	1	817779	924180	910149	673832	785090	811538
evm.model.Chr1.695_S11	MSSLVSDALASGGKLTKDDLN	evm.model.Chr1.695	MSSLVSDALAsGGK	0.968	0	0	0	0	0	0.968	0	0	89713.6	0	33952	54186.9
evm.model.Chr1.695_S611	LRNFNSALGNSPDKYSTAERP	evm.model.Chr1.695	NFNSALGNsPDK	0.968	0.96	0.947	0.863	0.959	0.968	0.964	87893.2	89565.2	79173.7	41826.6	80889.5	100891
evm.model.Chr1.709_S34	GDDAPRAVFPSLVGRPKHQGV	evm.model.Chr1.709	AVFPsLVGR	1	0	0	1	0	0	0	0	0	17724.3	0	0	0
evm.model.Chr1.721_S395	GGMTRMPKVQSTVQSIFGKQP	evm.model.Chr1.721	VQsTVQSIFGK	0.964	0.902	0.957	0.964	0	0	0	14080.8	12291.2	17067.6	0	0	0
evm.model.Chr1.721_S399	RMPKVQSTVQSIFGKQPSRSV	evm.model.Chr1.721	VQSTVQsIFGK	0.965	0.965	0	0.742	0	0	0	12371.9	0	13638.7	0	0	0
evm.model.Chr1.721_T91	SRTTPSVIAFTPEGERLAGTP	evm.model.Chr1.721	TTPSVIAFtPEGER	0.969	0.969	0.965	0.962	0	0	0	28447.7	22811.7	39609.9	0	0	0
evm.model.Chr1.751_S112	DDVDKLWGSASAADLMDSKLR	evm.model.Chr1.751	LWGSAsAADLMDSK	0.865	0.865	0	0	0	0	0	10189.6	0	0	0	0	0
evm.model.Chr1.758_S144	SQSEDGVKLNSDENFVHAPAE	evm.model.Chr1.758	LNsDENFVHAPAEDLAEK	1	1	0	1	0	0	0	30713.5	15882.8	98793.9	0	0	0
evm.model.Chr1.758_S24	KHKHKRRHRYSDSDERSRSPS	evm.model.Chr1.758	HRYsDsDER	0.956	0	0.956	0	0.947	0.946	0	0	25455.9	0	0	0	0
evm.model.Chr1.758_S26	KHKRRHRYSDSDERSRSPSVK	evm.model.Chr1.758	HRYsDsDER	0.956	0	0.956	0	0.944	0.946	0	0	25455.9	0	0	0	0
evm.model.Chr1.758_S550	VEDMDLDEDNSDEDDTQMSKW	evm.model.Chr1.758	QVEDMDLDEDNsDEDDTQMSK	0.969	0.968	0.969	0.968	0.969	0	0.965	613988	672183	922807	198039	277387	286412
evm.model.Chr1.758_S748	AMMKEKQRSQSSPYIVLSGAG	evm.model.Chr1.758	SQsSPYIVLSGAGK	0.964	0.96	0.964	0.918	0	0.817	0	27743.1	0	17586.1	11394.7	17899.6	0
evm.model.Chr1.760_S259	RGIKGLRGRFSPMSGRGGNNS	evm.model.Chr1.760	FsPMSGR;GRFsPMSGR	0.972	0.96	0.97	0.965	0.972	0.955	0.971	107485	66218.6	79811.6	144053	62392.9	107920
evm.model.Chr1.773_S69	KYHAIRYDEQSLHLKQGPSYI	evm.model.Chr1.773	YDEQsLHLK	0.97	0.84	0.965	0.876	0	0.944	0.97	34941.2	29179.5	30171.3	49474.3	49836.4	53330.2
evm.model.Chr1.773_T34	EGNCGCKGSYTLTPAESKELA	evm.model.Chr1.773	GSYtLTPAESK	0.959	0	0.959	0	0.945	0	0	51063.2	47401.5	43765.3	79535.1	64562.7	0
evm.model.Chr1.775_S259	PASKVKKEMLSPPLNKSSVTS	evm.model.Chr1.775	EMLsPPLNK;KEMLsPPLNK	1	1	1	1	1	1	1	1.14298e+06	1.01983e+06	1.00118e+06	925312	936127	933602
evm.model.Chr1.775_S316	PMQKKKSRTNSDDLPAKKRRR	evm.model.Chr1.775	TNsDDLPAK;TNsDDLPAKK	0.973	0.967	0.966	0.963	0.973	0.971	0.963	794145	523354	577627	544775	515792	607878
evm.model.Chr1.775_S399	LTEKEWVEEPSLSGEEDDKND	evm.model.Chr1.775	EWVEEPsLsGEEDDKNDK	1	0	1	1	0	0	0	0	56151.4	155716	0	0	0
evm.model.Chr1.775_S401	EKEWVEEPSLSGEEDDKNDKQ	evm.model.Chr1.775	EWVEEPSLsGEEDDK;EWVEEPSLsGEEDDKNDK;EWVEEPsLsGEEDDKNDK	1	0.962	1	1	0	0	0	495074	239112	991125	0	24554.3	0
evm.model.Chr1.775_T137	PVRYNGSTPLTDEEIGEARNQ	evm.model.Chr1.775	YNGSTPLtDEEIGEAR	0.97	0.969	0.97	0.968	0	0	0	64893.3	53496.8	54354.7	0	28054	0
evm.model.Chr1.781_S397	GYNVVLKDSFSPGLARGQEQI	evm.model.Chr1.781	DSFsPGLAR	0.971	0.96	0.968	0.948	0.791	0.971	0.969	102732	102202	108358	100568	124670	108665
evm.model.Chr1.782_S280	KVPGVAEPVTSDNGIRITPME	evm.model.Chr1.782	VPGVAEPVTsDNGIR	0.937	0.937	0	0	0	0	0	52249.8	0	0	0	0	0
evm.model.Chr1.782_S66	VEGVRTPFLMSGTQYKNLMPH	evm.model.Chr1.782	TPFLMsGTQYK	0.961	0.826	0.961	0.331	0	0	0	15028.3	18391.8	21457.9	0	0	0
evm.model.Chr1.782_T68	GVRTPFLMSGTQYKNLMPHDL	evm.model.Chr1.782	TPFLMSGtQYK	0.947	0	0	0.947	0	0	0.928	14489.9	0	18338.8	0	0	16562.9
evm.model.Chr1.791_S94	NNTLDRQTATSLFRIAKKYQP	evm.model.Chr1.791	QTATsLFR	0.967	0.934	0	0.814	0.967	0.917	0.967	60700.1	44819.3	45587.2	57490.9	67068	72373.9
evm.model.Chr1.791_T128	AEERAAGKPDTPTRRPLVLAS	evm.model.Chr1.791	AAGKPDtPTR	0.971	0.953	0.957	0.959	0	0.971	0.966	248419	190808	194168	225215	201778	165759
evm.model.Chr1.816_S10	*MNSSSALITSPNAQSSSSQS	evm.model.Chr1.816	MNSSSALITsPNAQSSSSQSTHK	0.908	0	0.908	0	0	0	0	0	18117.6	0	0	0	0
evm.model.Chr1.816_S122	QKQPISGVTTSPDNFKKLKSK	evm.model.Chr1.816	QPISGVTTsPDNFK;QPISGVTTsPDNFKK	0.961	0.785	0.457	0.871	0.961	0	0.958	173648	164851	186640	87711.9	96090.7	153465
evm.model.Chr1.832_S521	ITDKYKFQEGSEEEREAFERA	evm.model.Chr1.832	FQEGsEEER	1	1	1	1	1	1	1	39498.3	40851.3	34397.6	68853.1	42777.7	55507.9
evm.model.Chr1.842_S52	KNMKGDGEESSSSDSSEGVGE	evm.model.Chr1.842	GDGEESsSSDSSEGVGESK;GDGEESsSSDsSEGVGESK	0.952	0	0.952	0.916	0.444	0	0	0	48298.8	31039.1	81552	40861.9	38951.7
evm.model.Chr1.842_S56	GDGEESSSSDSSEGVGESKII	evm.model.Chr1.842	GDGEESSSSDsSEGVGESK;GDGEESsSSDsSEGVGESK	0.968	0.95	0.485	0.917	0	0.922	0.968	58444.7	72270.1	90919.5	32084.6	58142.9	77338.8
evm.model.Chr1.847_S200	LNQVSDMNNTSLTASRASLLS	evm.model.Chr1.847	LNQVSDMNNTsLTASR	0.964	0.959	0.964	0.961	0.962	0	0.955	85740.8	92065.9	106631	72521.5	91071.1	46231.8
evm.model.Chr1.847_S204	SDMNNTSLTASRASLLSMFSI	evm.model.Chr1.847	LNQVSDMNNTSLTAsR	0.962	0	0	0	0	0.962	0	0	0	0	0	19122.4	0
evm.model.Chr1.847_S26	IFEQDPVPLGSPNEGGSEKVK	evm.model.Chr1.847	IFEQDPVPLGsPNEGGSEK	0.969	0.966	0.965	0.967	0.969	0.918	0.961	726360	117026	1.286e+06	46274.9	237618	303598
evm.model.Chr1.847_S693	KLTSDHRKTGSVSSSSLHREK	evm.model.Chr1.847	TGsVSSSSLHR	0.965	0	0	0.964	0.965	0	0.964	0	0	0	19107.5	28956.1	0
evm.model.Chr1.847_T199	KLNQVSDMNNTSLTASRASLL	evm.model.Chr1.847	LNQVSDMNNtSLTASR	0.939	0	0.486	0	0	0.939	0	0	16104.2	40900	0	37803.5	0
evm.model.Chr1.852_S3	********MSSPDTQHLVEGR	evm.model.Chr1.852	SsPDTQHLVEGR	0.971	0.967	0.966	0.968	0.97	0.971	0.967	719166	722666	743751	671953	686087	755091
evm.model.Chr1.852_T181	KFSVTENKNGTPAVQVARSHT	evm.model.Chr1.852	NGtPAVQVAR	1	1	1	1	1	0	1	18406	28909.5	23526.3	17885.7	0	0
evm.model.Chr1.858_S26	EKGEKVKLQNSNSDDDSSLPE	evm.model.Chr1.858	LQNsNSDDDSSLPEK;LQNsNSDDDSsLPEK;LQNsNsDDDSSLPEK	0.964	0.927	0.898	0.759	0.964	0.489	0	45340.2	67788.3	197920	724772	408596	0
evm.model.Chr1.858_S28	GEKVKLQNSNSDDDSSLPEKS	evm.model.Chr1.858	LQNSNsDDDSSLPEK;LQNSNsDDDSsLPEK;LQNSNsDDDSsLPEKSEK;LQNsNsDDDSSLPEK	0.969	0.964	0.969	0.963	0.964	0.962	0.965	1.13333e+06	1.19637e+06	1.1633e+06	1.00541e+06	926198	1.01726e+06
evm.model.Chr1.858_S32	KLQNSNSDDDSSLPEKSEKTR	evm.model.Chr1.858	LQNSNSDDDsSLPEK	0.96	0.938	0.491	0.953	0.96	0	0.938	115857	609512	99524.1	565863	523553	537199
evm.model.Chr1.858_S33	LQNSNSDDDSSLPEKSEKTRN	evm.model.Chr1.858	LQNSNSDDDSsLPEK;LQNSNSDDDSsLPEKSEK;LQNSNsDDDSsLPEK;LQNSNsDDDSsLPEKSEK;LQNsNSDDDSsLPEK	0.97	0.968	0.969	0.967	0.97	0.97	0.965	961324	958275	909544	635651	564769	659254
evm.model.Chr1.862_S1065	KTTEGNVDFNSIKFFYPTRPD	evm.model.Chr1.862	TTEGNVDFNsIK	0.968	0	0.968	0	0	0	0	0	33195.7	0	0	0	0
evm.model.Chr1.862_S13	GSSSSLDNGTSFKKNQVGDVT	evm.model.Chr1.862	MNGSSSSLDNGTsFKK	0.966	0.966	0	0.953	0	0.963	0.95	14131.3	17923.9	15165.9	0	0	0
evm.model.Chr1.862_S4	*******MNGSSSSLDNGTSF	evm.model.Chr1.862	MNGsSSSLDNGTSFK;MNGsSSsLDNGTSFK	0.958	0.934	0.741	0.958	0.948	0.461	0.459	22337	134453	179445	23718.8	0	14327.4
evm.model.Chr1.862_S414	IDRTPEIDSMSDAGHKPDQVK	evm.model.Chr1.862	TPEIDSMsDAGHKPDQVK	0.944	0.944	0	0	0	0	0	67749.7	0	0	0	0	0
evm.model.Chr1.862_S699	KRPKSLRRVVSVTSGKSDDEI	evm.model.Chr1.862	RVVsVTSGK	0.97	0	0	0	0.954	0.97	0.968	60057.5	52367	55626.5	72837.5	68689.8	76252.1
evm.model.Chr1.862_S7	****MNGSSSSLDNGTSFKKN	evm.model.Chr1.862	MNGSSSsLDNGTSFK;MNGSSssLDNGTSFK;MNGsSSsLDNGTSFK	0.967	0.963	0.967	0.961	0.959	0.965	0.963	129688	269726	316863	97620.5	90462.1	119339
evm.model.Chr1.862_S705	RRVVSVTSGKSDDEIKEEEEE	evm.model.Chr1.862	VVSVTSGKsDDEIK	0.954	0	0	0.954	0	0	0	0	0	9235.94	0	0	0
evm.model.Chr1.899.2_S44	AKAGHVKRAISLVHEDVASRY	evm.model.Chr1.899.2	AIsLVHEDVASR	0.971	0.97	0.97	0.952	0.971	0	0	80523.1	75603.9	126021	59587.4	98369.1	0
evm.model.Chr1.921_S328	VARAKKRTVGSPFESGVEQGP	evm.model.Chr1.921	TVGsPFESGVEQGPQVDSEQFHK	0.969	0.969	0.96	0.957	0	0	0	223239	20188.6	671419	0	0	0
evm.model.Chr1.930_S845	RDQPGNVIRSSFDGQLKDLLQ	evm.model.Chr1.930	SsFDGQLK	0.951	0	0	0	0.951	0	0	0	0	21194.3	78107.6	0	0
evm.model.Chr1.954.1_S168	LFKLFGKASSSDESDEDDEEE	evm.model.Chr1.954.1	ASSsDEsDEDDEEENVENEEK	0.893	0	0	0.893	0	0	0	0	0	224515	0	0	0
evm.model.Chr1.954.1_S171	LFGKASSSDESDEDDEEENVE	evm.model.Chr1.954.1	ASSSDEsDEDDEEENVENEEK;ASSsDEsDEDDEEENVENEEK	0.963	0	0	0.963	0	0	0	254809	256625	500782	123110	169250	216099
evm.model.Chr1.954.1_S230	APKETRSVEDSPEK*******	evm.model.Chr1.954.1	SVEDsPEK	0.972	0.969	0.971	0.955	0.97	0.968	0.972	23890.4	33259.1	25127.3	54061.1	90670.5	63498.5
evm.model.Chr1.961_S1349	PQLKETKRGPSPIIFSSTAPS	evm.model.Chr1.961	GPsPIIFSSTAPSK;RGPsPIIFSSTAPSK	0.972	0.956	0.966	0.966	0.972	0.971	0.971	170948	164073	214170	66720.7	139597	148376
evm.model.Chr1.961_S1463	INLPKSRWEESDEDNKRDDNA	evm.model.Chr1.961	WEEsDEDNKR	1	1	1	1	0	1	1	160182	195416	176528	134817	154160	126342
evm.model.Chr1.961_S1529	QDENIKTRKVSIAGNKDSSAG	evm.model.Chr1.961	KVsIAGNK	1	0	0	0	0	1	0	0	25474	0	51032.8	56695	0
evm.model.Chr1.961_S1612	HKHKKKFANDSSDDLENSKGN	evm.model.Chr1.961	FANDsSDDLENSK;FANDssDDLENSK;KFANDssDDLENSK	0.972	0.968	0.971	0.969	0.972	0.972	0.97	259733	325481	648352	123809	155506	149631
evm.model.Chr1.961_S1613	KHKKKFANDSSDDLENSKGNY	evm.model.Chr1.961	FANDSsDDLENSK;FANDssDDLENSK;KFANDssDDLENSK	0.972	0.968	0.971	0.969	0.972	0.972	0.97	253739	290283	621022	89565.6	111930	88236.8
evm.model.Chr1.961_S1654	MKNVDKRKTDSMSPDQRIRKK	evm.model.Chr1.961	KTDsMsPDQR	0.944	0	0	0	0	0.944	0	32332.8	43280.3	41878.1	63232.1	63367.4	47637.6
evm.model.Chr1.961_S1656	NVDKRKTDSMSPDQRIRKKRK	evm.model.Chr1.961	KTDSMsPDQR;KTDsMsPDQR	0.945	0	0	0.945	0	0.944	0	95738.1	99081.4	98967.2	103335	101828	85477
evm.model.Chr1.961_S1720	DEDTQRKRRVSYDSGSRERSR	evm.model.Chr1.961	RVsYDSGSR;RVsYDsGSR	0.961	0.737	0.961	0	0.921	0	0	77427.6	69912.7	69118.9	69332	61239.6	36499.2
evm.model.Chr1.961_S1723	TQRKRRVSYDSGSRERSRNHG	evm.model.Chr1.961	RVsYDsGSR	0.923	0	0	0	0.923	0	0	47040.9	48438.3	44562.2	69332	61239.6	36499.2
evm.model.Chr1.961_S421	NVSKREVGSSSPSEANQPIRI	evm.model.Chr1.961	EVGSSsPSEANQPIR	0.971	0.965	0.968	0.966	0.971	0.969	0.965	552473	550307	508546	489067	496002	550120
evm.model.Chr1.961_S840	RARASKRKYKSPPRSRNYSRS	evm.model.Chr1.961	KYKsPPR	0.969	0.949	0.909	0.896	0	0.969	0	51954.5	44836.1	41334	23983.9	30191.7	0
evm.model.Chr1.961_S944	DRFIQPRYSRSPSPPGTSNPV	evm.model.Chr1.961	sPSPPGTSNPVLPPMR;sPsPPGTSNPVLPPMR	0.969	0.969	0.968	0.968	0	0.479	0.961	185328	193228	343986	0	85303.4	77787.9
evm.model.Chr1.961_S946	FIQPRYSRSPSPPGTSNPVLP	evm.model.Chr1.961	SPsPPGTSNPVLPPMR;sPsPPGTSNPVLPPMR	0.969	0.969	0.968	0.968	0	0	0.961	379252	391222	611311	8761.65	56094.3	94427.3
evm.model.Chr1.965_S139	SRSPRRDRRRSSYSRSPVSKD	evm.model.Chr1.965	RsSYsRsPVSK;RssySRSPVSK	0.907	0	0.831	0	0.907	0.563	0	0	1.31387e+06	0	2.50721e+06	1.19752e+06	0
evm.model.Chr1.965_S140	RSPRRDRRRSSYSRSPVSKDR	evm.model.Chr1.965	RSsYSRsPVSK;RSsYsRsPVSK;RssySRSPVSK	0.927	0	0.927	0.918	0.906	0	0.773	0	1.57864e+06	1746826	2657876	1.32842e+06	1.0926e+06
evm.model.Chr1.965_S142	PRRDRRRSSYSRSPVSKDRCS	evm.model.Chr1.965	RSSYsRSPVsK;RSSYsRsPVSK;RSsYsRsPVSK;RsSYsRsPVSK;SSYsRsPVSK;SSysRsPVSK	0.925	0	0.925	0.918	0.896	0.646	0	972999	4.16298e+06	5.19907e+06	3.10278e+06	2921786	1.03463e+06
evm.model.Chr1.965_S144	RDRRRSSYSRSPVSKDRCSVS	evm.model.Chr1.965	RSSYsRsPVSK;RSsYSRsPVSK;RSsYsRsPVSK;RsSYsRsPVSK;SSYsRsPVSK;SSysRsPVSK	0.924	0	0.924	0.909	0.896	0.647	0.788	972999	4.16298e+06	3.84913e+06	3.10278e+06	2921786	1.0926e+06
evm.model.Chr1.965_S147	RRSSYSRSPVSKDRCSVSPRR	evm.model.Chr1.965	RSSYsRSPVsK	0.766	0	0	0.766	0	0	0	0	0	1697727	0	0	1.03463e+06
evm.model.Chr1.965_S152	SRSPVSKDRCSVSPRRSASPV	evm.model.Chr1.965	DRCsVsPR	1	0	1	0	0	0	1	0	26843.9	29861.5	0	52464.6	56205.2
evm.model.Chr1.965_S154	SPVSKDRCSVSPRRSASPVGR	evm.model.Chr1.965	DRCsVsPR	1	0	1	0	0	0	1	0	26843.9	29861.5	0	52464.6	56205.2
evm.model.Chr1.965_S158	KDRCSVSPRRSASPVGRRSLS	evm.model.Chr1.965	RsASPVGR;RsAsPVGR	1	1	1	1	1	1	1	425049	480524	440245	879960	918254	620987
evm.model.Chr1.965_S160	RCSVSPRRSASPVGRRSLSRS	evm.model.Chr1.965	RsAsPVGR	1	1	1	1	1	1	1	369851	436916	396984	879960	847893	595418
evm.model.Chr1.965_S166	RRSASPVGRRSLSRSPSPYRN	evm.model.Chr1.965	sLSRsPsPYR;sLsRsPSPYR	0.959	0	0	0.959	0.588	0	0	0	452982	630684	0	24201.7	0
evm.model.Chr1.965_S168	SASPVGRRSLSRSPSPYRNGR	evm.model.Chr1.965	SLsRsPSPYR;sLsRsPSPYR	0.959	0	0	0.959	0.588	0	0	0	373312	484200	0	24201.7	77726
evm.model.Chr1.965_S170	SPVGRRSLSRSPSPYRNGRES	evm.model.Chr1.965	SLsRsPSPYR;sLSRsPsPYR;sLsRsPSPYR	0.96	0	0	0.96	0.647	0	0	0	540239	683673	0	24201.7	77726
evm.model.Chr1.965_S172	VGRRSLSRSPSPYRNGRESRS	evm.model.Chr1.965	sLSRsPsPYR	0.959	0	0	0.959	0	0	0	0	166927	199474	0	0	0
evm.model.Chr1.965_Y141	SPRRDRRRSSYSRSPVSKDRC	evm.model.Chr1.965	RssySRSPVSK;SSysRsPVSK	0.906	0	0	0	0.906	0	0	0	0	0	1.81691e+06	395853	0
evm.model.Chr1.968_S224	HVEKEREKEISDDEEEEEEKK	evm.model.Chr1.968	EIsDDEEEEEEK;EIsDDEEEEEEKK;EKEIsDDEEEEEEK;EKEIsDDEEEEEEKK	1	1	1	1	1	1	1	8345930	9801421	9629764	6.31321e+06	5449509	6.33738e+06
evm.model.Chr1.968_S296	PLWTRNPDDISQDEYGEFYKS	evm.model.Chr1.968	NPDDIsQDEYGEFYK	0.969	0.969	0.966	0.93	0	0	0	101230	16160.9	190065	0	0	0
evm.model.Chr1.968_S43	NKEIFLRELISNSSDALDKIR	evm.model.Chr1.968	ELIsNSSDALDK	0.968	0	0.957	0.967	0	0.968	0	25222	22202.4	25341.9	0	17023.7	26934.6
evm.model.Chr1.968_S444	KNLKLGIHEDSQNRKKLAGFL	evm.model.Chr1.968	LGIHEDsQNR	1	1	1	1	1	1	1	63893.3	50602.6	57914.4	78830.7	70968.3	70589.9
evm.model.Chr1.968_S45	EIFLRELISNSSDALDKIRYE	evm.model.Chr1.968	ELISNsSDALDK	0.967	0.967	0.957	0.959	0.49	0.955	0.967	313854	255336	189955	237132	219779	250976
evm.model.Chr1.968_S494	YITGESRDQVSNSAFVERVTK	evm.model.Chr1.968	DQVsNSAFVER	0.958	0	0.958	0	0.5	0	0	24479.3	21596.7	19860	27809.3	24108.9	0
evm.model.Chr1.968_S56	SDALDKIRYESLTDPSKLDSG	evm.model.Chr1.968	YEsLTDPSK	0.966	0.928	0.964	0.966	0.962	0	0.959	21876.3	16697.4	23823.5	45758.5	44727.9	49901.2
evm.model.Chr1.968_T284	KYTELEELNKTKPLWTRNPDD	evm.model.Chr1.968	tKPLWTR	0.974	0.97	0	0	0.974	0.973	0	30810.1	0	37928.8	60904	72430.9	76271.9
evm.model.Chr1.968_Y275	KKKKKKIKEKYTELEELNKTK	evm.model.Chr1.968	yTELEELNK	0.96	0.956	0.949	0.96	0	0	0	20339.9	13087.8	19695.9	0	0	0
evm.model.Chr1.968_Y300	RNPDDISQDEYGEFYKSLSND	evm.model.Chr1.968	NPDDISQDEyGEFYK	0.795	0	0	0.795	0	0	0	13016.8	0	21875.4	0	0	0
evm.model.Chr1.977_S22	DLNKTMQKSASQSSMGYKKPY	evm.model.Chr1.977	SAsQSSMGYK;SAsQSsMGYK	0.971	0.963	0.968	0.957	0.971	0.97	0.968	254843	260555	229891	346980	349587	306846
evm.model.Chr1.977_S25	KTMQKSASQSSMGYKKPYMGK	evm.model.Chr1.977	SASQSsMGYK;SAsQSsMGYK	0.967	0	0.959	0.485	0.967	0.953	0.954	26873.9	14193.2	21396.8	31919.6	42724.7	32420
evm.model.Chr1.977_S8	***MKITLHDSSATDLNKTMQ	evm.model.Chr1.977	ITLHDsSATDLNK	0.89	0	0	0.89	0	0.886	0.785	0	0	212869	0	222559	241135
evm.model.Chr1.977_S9	**MKITLHDSSATDLNKTMQK	evm.model.Chr1.977	ITLHDSsATDLNK	0.772	0.772	0.721	0.658	0.507	0	0	186974	193767	211804	182388	0	0
evm.model.Chr10.104_S127	TTSTTATDNNSDDEPPQFNEI	evm.model.Chr10.104	KKPTTSTTATDNNsDDEPPQFNEIK;KPTTSTTATDNNsDDEPPQFNEIK	0.968	0.968	0.966	0.964	0	0	0	1.07109e+06	536707	1.63764e+06	0	0	11661.3
evm.model.Chr10.104_S36	STSKEDHSLDSDDEDEVKNDY	evm.model.Chr10.104	EDHSLDsDDEDEVK;EDHSLDsDDEDEVKNDYEK	0.967	0.954	0.967	0.966	0.966	0.966	0.955	214635	150281	265249	50961.4	58568.4	61818.1
evm.model.Chr10.130_evm.model.Chr10.131_S1344	QRNADMFEVDSLRAWLNSGIG	evm.model.Chr10.130_evm.model.Chr10.131	NADMFEVDsLR	1	1	1	1	1	1	1	67452.7	65304.3	102870	38725.5	57281.2	65993.8
evm.model.Chr10.130_evm.model.Chr10.131_S2415	KKKVAARQQHSNEDDPHVAGD	evm.model.Chr10.130_evm.model.Chr10.131	QQHsNEDDPHVAGDSASGK	0.97	0.969	0.97	0.968	0	0	0	18522.1	52015.2	81045.3	0	0	18030
evm.model.Chr10.130_evm.model.Chr10.131_S2558	PQTSTTSSARSQTSISTVSET	evm.model.Chr10.130_evm.model.Chr10.131	sQTSISTVSETPAR	0.957	0.957	0.957	0.329	0	0	0	25498	16043.1	29917.5	0	0	0
evm.model.Chr10.130_evm.model.Chr10.131_S2561	STTSSARSQTSISTVSETPAR	evm.model.Chr10.130_evm.model.Chr10.131	SQTsISTVSETPAR	0.962	0	0.962	0	0.754	0.816	0	0	23485.8	31165.4	34652.4	24219.2	0
evm.model.Chr10.130_evm.model.Chr10.131_S2732	IQLQQASKGGSVLGLATNSSR	evm.model.Chr10.130_evm.model.Chr10.131	GGsVLGLATNSSR	0.973	0.969	0.97	0.96	0.973	0.972	0.972	46641.2	50647	57312.7	44290.4	56319	43742.7
evm.model.Chr10.130_evm.model.Chr10.131_S2740	GGSVLGLATNSSRLGSNQFRR	evm.model.Chr10.130_evm.model.Chr10.131	GGSVLGLATNsSR	0.924	0.486	0.924	0.483	0	0	0	30352.9	31103.5	36970.3	0	34592.1	43141.9
evm.model.Chr10.130_evm.model.Chr10.131_S2755	SNQFRRWRTGSGVLSAVQLSR	evm.model.Chr10.130_evm.model.Chr10.131	TGsGVLSAVQLSR	0.967	0.926	0.958	0.967	0	0.964	0	33976.1	30371.4	143577	0	22995.6	22363.6
evm.model.Chr10.130_evm.model.Chr10.131_S928	NLKIVLPSSISRNVETDEENL	evm.model.Chr10.130_evm.model.Chr10.131	IVLPSSIsR	0.937	0	0	0.937	0	0	0	0	0	5875.95	0	0	0
evm.model.Chr10.130_evm.model.Chr10.131_S955	QIVTQTKRTPSPPPTPQPPRV	evm.model.Chr10.130_evm.model.Chr10.131	RTPsPPPTPQPPR;TPsPPPTPQPPR	0.968	0.962	0.966	0.961	0.966	0.968	0.968	233778	225097	120269	111937	139774	87234.4
evm.model.Chr10.130_evm.model.Chr10.131_T2270	AKSIAEEMDTTPPPHPPKMVK	evm.model.Chr10.130_evm.model.Chr10.131	SIAEEMDTtPPPHPPK	0.962	0.948	0.946	0.962	0.956	0.946	0	154818	276552	321239	61293.8	54533.5	124012
evm.model.Chr10.130_evm.model.Chr10.131_T2738	SKGGSVLGLATNSSRLGSNQF	evm.model.Chr10.130_evm.model.Chr10.131	GGSVLGLAtNSSR	0.921	0	0	0	0.332	0.331	0.921	0	31103.5	38035	31041	36006.7	41889.7
evm.model.Chr10.134_S1065	GDVRVVEGRGSNESSIMEDEK	evm.model.Chr10.134	GsNESSIMEDEK	0.967	0.964	0.967	0.965	0	0	0	20198.7	15988.5	17936.2	0	0	26143.7
evm.model.Chr10.134_S1454	LKHNDQKGLGSPGMRRRRRRV	evm.model.Chr10.134	GLGsPGMR	1	1	1	1	0	0	1	52839.5	52721.1	48463.4	31877.2	40388.9	94856.6
evm.model.Chr10.134_S493	REDGGTLGVFSPKRTPHVVNL	evm.model.Chr10.134	EDGGTLGVFsPK	0.948	0	0	0.948	0	0	0	0	0	9526.06	0	0	0
evm.model.Chr10.140_S119	NVQTSGQGVDSFDDDSKDDPQ	evm.model.Chr10.140	NVQTSGQGVDsFDDDSKDDPQTQQNNR	0.966	0.966	0.944	0.961	0	0	0	94350.4	81388.5	104613	0	0	0
evm.model.Chr10.140_S386	MEAPSSRLFGSYDTQNKTAVN	evm.model.Chr10.140	LFGsYDTQNK	0.96	0.927	0.52	0.96	0	0.494	0.53	19713.2	21085.1	21224.9	0	34390.8	37666.7
evm.model.Chr10.140_S498	TEAVKASLGLSPVTTEQVETS	evm.model.Chr10.140	ASLGLsPVTTEQVETSR	0.971	0.968	0.967	0.967	0.918	0.971	0.969	326192	217655	1.04489e+06	67990.5	79032.5	119113
evm.model.Chr10.158_S694	EAEEKSLANSSLSSHERITLI	evm.model.Chr10.158	SLANSsLSSHER	0.957	0	0.957	0	0.948	0	0.949	0	28486.5	32668.9	21229.2	30556.6	20844.4
evm.model.Chr10.158_T497	RMEQLELSGNTAQKLQAAFLY	evm.model.Chr10.158	MEQLELSGNtAQK	0.908	0.908	0	0	0	0	0	22112	0	0	0	0	0
evm.model.Chr10.158_T960	AAVFSGQPDGTMEEKVKDFND	evm.model.Chr10.158	LAAVFSGQPDGtMEEK	0.969	0	0.969	0	0	0	0	37148.5	55842.3	0	0	0	0
evm.model.Chr10.171_S299	PRSGFSVVPISPTRVGFFGGV	evm.model.Chr10.171	SGFSVVPIsPTR	0.965	0.492	0.489	0.965	0.492	0.493	0.953	83784.5	74013.6	132237	22979	29383.6	41776.2
evm.model.Chr10.171_S59	TFSEEQSSHPSPRTNLSVSAH	evm.model.Chr10.171	TTFSEEQSSHPsPR	0.967	0.915	0.967	0.961	0	0.962	0	37996.8	46107	45859.8	24807.7	29142.3	29710.5
evm.model.Chr10.213_S231	KTEAELPKEKSIVSLSKTSRK	evm.model.Chr10.213	EKsIVsLsKTSR	0.949	0	0	0	0.949	0	0	89457.9	88388.7	103410	39040.4	0	57750.6
evm.model.Chr10.213_S234	AELPKEKSIVSLSKTSRKTVR	evm.model.Chr10.213	EKsIVsLsKTSR	0.949	0	0	0	0.949	0	0	89457.9	88388.7	103410	39040.4	0	57750.6
evm.model.Chr10.213_S236	LPKEKSIVSLSKTSRKTVRVK	evm.model.Chr10.213	EKsIVsLsKTSR	0.948	0	0	0	0.948	0	0	89457.9	88388.7	103410	39040.4	0	57750.6
evm.model.Chr10.213_S311	RKFRNIAPPESDSEDEVRSSK	evm.model.Chr10.213	NIAPPEsDSEDEVR;NIAPPEsDsEDEVR	1	1	1	1	1	1	1	1.16856e+06	1.55351e+06	1.7252e+06	784855	908610	895675
evm.model.Chr10.213_S313	FRNIAPPESDSEDEVRSSKPS	evm.model.Chr10.213	NIAPPESDsEDEVR;NIAPPEsDsEDEVR	1	1	1	1	1	1	1	1117425	1.58256e+06	1.67865e+06	728827	879418	839824
evm.model.Chr10.213_S341	SSVKTAPGYVSDDDSDGNMKS	evm.model.Chr10.213	TAPGYVsDDDSDGNMK;TAPGYVsDDDsDGNMK	0.967	0.965	0.966	0.966	0	0.967	0	235309	279400	279634	35769.8	75730	24128.2
evm.model.Chr10.213_S345	TAPGYVSDDDSDGNMKSKGKV	evm.model.Chr10.213	TAPGYVSDDDsDGNMK;TAPGYVsDDDsDGNMK	0.969	0.945	0.968	0.966	0	0.969	0.956	184864	285775	288273	54852.9	70899.6	48538.2
evm.model.Chr10.213_S96	MTKEETSKTISPNNNANVSAK	evm.model.Chr10.213	TIsPNNNANVSAK	0.973	0.965	0.966	0.957	0.973	0.971	0.969	531750	474906	466168	483189	466029	466346
evm.model.Chr10.213_T447	ETHKRNYDVTTPDEIPRKRRS	evm.model.Chr10.213	NYDVTtPDEIPR	0.97	0.965	0.967	0	0.97	0.969	0.957	92450.1	79013.2	109484	31669.4	58484.5	48233.2
evm.model.Chr10.237_S253	EVVKAKAGAGSATLSMAYAGA	evm.model.Chr10.237	AGAGsATLSMAYAGAR	0.958	0.444	0	0	0	0.958	0	22669.6	7660.67	11452.9	0	16412.4	0
evm.model.Chr10.237_S274	RFAASALDALSGKEGVVECAF	evm.model.Chr10.237	FAASALDALsGK	0.967	0.96	0.954	0.967	0	0	0	17825.7	18026.9	26444.7	0	0	0
evm.model.Chr10.237_T242	AITTRIQDAGTEVVKAKAGAG	evm.model.Chr10.237	IQDAGtEVVK	1	0	1	0	0	0	0	0	13573.8	28669.5	0	0	58329.7
evm.model.Chr10.242_S362	NPISRASSLKSPFSRSSTLSK	evm.model.Chr10.242	ASSLKsPFSR	0.949	0.903	0.842	0.91	0	0.949	0.936	41314.8	42455.9	52438	51854.3	61001	54355.5
evm.model.Chr10.242_S458	SIDERSLRRPSETAVPTTRIK	evm.model.Chr10.242	RPsETAVPTTR	0.958	0.958	0	0	0	0	0	26808	0	0	0	0	0
evm.model.Chr10.242_T482	GFVPPLLREQTVEDDELLKEK	evm.model.Chr10.242	EQtVEDDELLK	1	0	1	0	0	0	0	0	11112.4	0	0	0	0
evm.model.Chr10.257_S142	SAVHYDRTGRSLGSADVHFER	evm.model.Chr10.257	sLGSADVHFER	0.967	0	0	0.967	0	0	0	0	0	21098.4	0	0	0
evm.model.Chr10.257_S182	VMQIRFVDGASPTKSNDMNGR	evm.model.Chr10.257	FVDGAsPTK	0.974	0.968	0.969	0.967	0.974	0.973	0.972	1.15867e+06	1.21249e+06	963563	1.8389e+06	1.78529e+06	1.56063e+06
evm.model.Chr10.265_S74	LNSRVAGEWQSDKRNPLTGSE	evm.model.Chr10.265	VAGEWQsDKR	1	0	0	1	0	0	0	0	0	14738.4	0	0	0
evm.model.Chr10.269_S19	NGSPNPKKKGSSFLGRKTRKS	evm.model.Chr10.269	KGsSFLGR	0.934	0.5	0.5	0	0.934	0.5	0	72127.6	62497.2	59854.4	57114.3	74461.1	69850.9
evm.model.Chr10.269_S20	GSPNPKKKGSSFLGRKTRKSK	evm.model.Chr10.269	KGSsFLGR	0.892	0	0	0.892	0	0	0	0	0	58792	0	0	0
evm.model.Chr10.269_S35	KTRKSKEVKDSLSEEDLVKKG	evm.model.Chr10.269	EVKDsLSEEDLVK	0.967	0.967	0.966	0.906	0.965	0.877	0.967	109941	97890.7	148700	49767.6	79697.5	89053.8
evm.model.Chr10.269_S37	RKSKEVKDSLSEEDLVKKGNI	evm.model.Chr10.269	DSLsEEDLVK	0.971	0	0	0	0.971	0.967	0.944	0	25696.8	0	24129.4	0	36757.8
evm.model.Chr10.288_S193	PGAPIATNGVSPIEQQSKADR	evm.model.Chr10.288	TFTPGAPIATNGVsPIEQQSK	0.963	0.946	0.855	0.963	0	0	0	0	0	27409.6	0	0	0
evm.model.Chr10.293_S328	KRPESSFISNSPRKQIRNERP	evm.model.Chr10.293	RPESSFISNsPR	0.959	0.94	0.858	0.956	0.944	0	0.959	162900	131121	157382	117246	155266	160365
evm.model.Chr10.293_S434	NRDGNERERRSGGGGDFSLLQ	evm.model.Chr10.293	sGGGGDFSLLQIR	0.969	0.969	0.967	0.968	0	0	0	7980.64	4884.39	49681.2	0	0	0
evm.model.Chr10.293_S556	QNRIPVKRNRSLSISPVRRGT	evm.model.Chr10.293	NRsLsISPVR;NRsLsIsPVR;sLSISPVR;sLSIsPVR;sLSIsPVRR	1	0.969	0.968	1	0.971	0.972	0.865	219784	226930	213005	209043	335676	246925
evm.model.Chr10.293_S558	RIPVKRNRSLSISPVRRGTTQ	evm.model.Chr10.293	NRsLsISPVR;NRsLsIsPVR;SLsISPVR;SLsIsPVR;SLsIsPVRR	1	0.964	0.969	1	0	0.947	0	208583	298920	248217	228683	326117	80730.3
evm.model.Chr10.293_S560	PVKRNRSLSISPVRRGTTQLS	evm.model.Chr10.293	NRsLsIsPVR;SLSIsPVR;SLSIsPVRR;SLsIsPVR;SLsIsPVRR;sLSIsPVR;sLSIsPVRR	1	0.942	0.968	1	0.971	0.96	0.968	705993	843668	900122	1.02221e+06	549310	825066
evm.model.Chr10.311_S424	RPVTEVTEVDSPLPKNNTRME	evm.model.Chr10.311	PVTEVTEVDsPLPK	0.972	0.969	0.97	0.968	0.972	0.972	0.972	73457.3	58595.8	94800.9	29132.6	64402.7	77349
evm.model.Chr10.311_S667	LLRTTHLIVMSPDGDKYNGCK	evm.model.Chr10.311	TTHLIVMsPDGDK	0.916	0	0	0.916	0	0	0	0	0	11323	0	0	0
evm.model.Chr10.311_S767	REKILRMGLDSPSTFMTKGVD	evm.model.Chr10.311	MGLDsPSTFMTK	0.964	0.962	0.959	0	0	0.752	0.964	39450.5	37362	34674	12282.3	27437.6	28855.4
evm.model.Chr10.318_S362	LRNSGYSRTNSEPGHNEVVPE	evm.model.Chr10.318	TNsEPGHNEVVPENR	0.959	0	0.959	0	0	0	0.946	0	55152.6	0	0	0	29099.7
evm.model.Chr10.318_S538	NRPYRPSVPNSPERMGHVDPS	evm.model.Chr10.318	PSVPNsPER;PYRPSVPNsPER	0.97	0.967	0.962	0.95	0.959	0.964	0.97	434763	443174	431856	215891	458416	233677
evm.model.Chr10.318_S672	TSDDITYRRGSHSIAV*****	evm.model.Chr10.318	RGsHSIAV	0.962	0.959	0.962	0	0	0	0	89544.4	99849.3	91851	85432	112229	0
evm.model.Chr10.323_S578	ASTNDDGGKRSPLSDDGSNKS	evm.model.Chr10.323	INSVASTNDDGGKRsPLSDDGSNK;INSVASTNDDGGKRsPLsDDGSNK	0.966	0.959	0.966	0.965	0	0.96	0	183285	234965	181391	0	77984.9	0
evm.model.Chr10.323_S581	NDDGGKRSPLSDDGSNKSGNS	evm.model.Chr10.323	INSVASTNDDGGKRsPLsDDGSNK;SPLsDDGSNK	0.97	0.952	0.97	0.966	0.97	0.967	0	114302	191159	116154	64562.7	84154.9	47968.1
evm.model.Chr10.327_T46	KLASEDINHITPTQGFNIKSV	evm.model.Chr10.327	LASEDINHItPTQGFNIK	0.964	0	0	0.964	0	0	0	0	0	79124	0	0	0
evm.model.Chr10.339_S462	TLKMQTQIQSSPKNAQSFREK	evm.model.Chr10.339	MQTQIQSsPK	0.955	0	0	0	0	0	0.955	0	0	0	49046.1	0	36464.7
evm.model.Chr10.339_T1964	RIIDKTSLMPTPTLEKHKDWE	evm.model.Chr10.339	TSLMPtPTLEK	0.97	0.96	0.966	0	0.965	0.97	0.968	113336	102700	56379.7	45822.4	123436	134641
evm.model.Chr10.373_S818	KVKSKHSRSASQFSITGTSSD	evm.model.Chr10.373	SAsQFSITGTSSDENNSSK	0.947	0	0.947	0	0	0	0	0	12560.5	0	0	0	0
evm.model.Chr10.373_S826	SASQFSITGTSSDENNSSKAM	evm.model.Chr10.373	SASQFSITGTssDENNSSK	0.773	0	0	0.773	0	0	0	0	0	75344.1	0	0	0
evm.model.Chr10.373_S827	ASQFSITGTSSDENNSSKAMD	evm.model.Chr10.373	SASQFSITGTSsDENNSSK;SASQFSITGTssDENNSSK	0.923	0.422	0	0.923	0	0	0	53744.5	0	132761	0	0	0
evm.model.Chr10.373_S839	ENNSSKAMDKSPTTSSLANSA	evm.model.Chr10.373	AMDKsPTTSSLANSADNSNTTTQTQK	0.801	0	0.318	0.801	0	0	0	0	16171.1	21016.8	0	0	0
evm.model.Chr10.373_S848	KSPTTSSLANSADNSNTTTQT	evm.model.Chr10.373	AMDKSPTTSSLANsADNSNTTTQTQK	0.78	0.78	0	0	0	0	0	17370	16082.6	19713.1	0	0	0
evm.model.Chr10.373_S865	TTQTQKKPPISPAPKPKKPLM	evm.model.Chr10.373	KPPIsPAPK;KPPIsPAPKPK	1	1	1	1	1	1	1	369608	344268	289705	369714	408146	345210
evm.model.Chr10.373_T825	RSASQFSITGTSSDENNSSKA	evm.model.Chr10.373	SASQFSITGtSSDENNSSK	0.817	0	0	0.817	0	0	0	0	0	78464.9	0	0	0
evm.model.Chr10.380_evm.model.Chr10.381_S212	QIVGYEARLASMEGLLQEKKM	evm.model.Chr10.380_evm.model.Chr10.381	LAsMEGLLQEK	1	0	0	1	0	0	0	0	0	8547.45	0	0	0
evm.model.Chr10.380_evm.model.Chr10.381_S231	KMELQKFKSGSNDGMSSNIEA	evm.model.Chr10.380_evm.model.Chr10.381	SGsNDGMSSNIEAYR	0.967	0	0.964	0	0.967	0	0	142350	202851	227247	107558	0	72557.1
evm.model.Chr10.380_evm.model.Chr10.381_S60	ANMNSIKTFWSPELKKERALR	evm.model.Chr10.380_evm.model.Chr10.381	TFWsPELK	0.953	0.953	0	0.951	0	0	0	7446.57	0	19007.8	0	0	0
evm.model.Chr10.380_evm.model.Chr10.381_S814	RLKLMQQNFDSDPDSNNDGKV	evm.model.Chr10.380_evm.model.Chr10.381	LMQQNFDsDPDSNNDGK	0.968	0.956	0.968	0.957	0	0	0.966	39324.2	40672.2	41058.1	0	0	11781.7
evm.model.Chr10.418_S204	PQREAGIKVESTEELVSKLKE	evm.model.Chr10.418	VEsTEELVSK	0.969	0.951	0.965	0.963	0.969	0	0.494	16143.7	10481.1	10519.4	21867.6	19637.3	20541.9
evm.model.Chr10.425.1_S640	PSINPSNTRHSQPSLLEFDSL	evm.model.Chr10.425.1	HsQPSLLEFDSLR	0.963	0	0	0.963	0	0	0	0	0	50014.8	0	0	0
evm.model.Chr10.425.1_S676	GQKKSMQRSYSLEHLVEEKYG	evm.model.Chr10.425.1	SYsLEHLVEEK	0.969	0.969	0.969	0.968	0	0.964	0.966	453639	259206	1.13846e+06	59206	74317.1	78836.7
evm.model.Chr10.425.1_S690	LVEEKYGEPRSSVTIVPNNRM	evm.model.Chr10.425.1	sSVTIVPNNR	0.887	0.494	0.887	0	0.495	0	0.732	52064.4	52484.4	50743.6	49635	53841.8	48449.4
evm.model.Chr10.425.1_S701	SVTIVPNNRMSYGNSYDDRSI	evm.model.Chr10.425.1	MsYGNSYDDR	0.966	0.966	0.963	0.914	0.765	0.964	0.95	68655.1	63814.2	57431.8	63623.9	69351.9	80873.3
evm.model.Chr10.425.1_S716	YDDRSINRHASREEIDKVADH	evm.model.Chr10.425.1	HAsREEIDK	1	1	1	1	1	1	1	183465	213568	20216.8	214955	202383	145693
evm.model.Chr10.425.1_S733	VADHIEVLNKSWDHLARSKEH	evm.model.Chr10.425.1	sWDHLAR	1	1	1	1	1	1	1	437119	441645	443189	498525	457791	506961
evm.model.Chr10.425.1_T788	DQDNYPYMDDTMDNRRRYNAQ	evm.model.Chr10.425.1	LADQDNYPYMDDtMDNR	0.953	0	0	0.953	0	0	0	0	0	7305.74	0	0	0
evm.model.Chr10.430_S247	SDYLGLKRVASVETDLGTIKT	evm.model.Chr10.430	VAsVETDLGTIK	0.971	0.968	0.97	0.966	0	0.971	0.971	32988.9	31882.4	64544.2	0	29786.4	29403.3
evm.model.Chr10.438_S232	EGLERSLFSGSNTGINFDKYE	evm.model.Chr10.438	SLFSGsNTGINFDK	0.942	0	0	0.942	0	0	0	0	0	27574.8	0	0	0
evm.model.Chr10.438_S668	GKPRSSGKRFSAGFGSRDYRQ	evm.model.Chr10.438	FsAGFGSR;RFsAGFGSR	0.972	0.969	0.971	0.969	0.969	0.971	0.972	516470	491961	540812	400542	449300	460388
evm.model.Chr10.438_S673	SGKRFSAGFGSRDYRQQQNRG	evm.model.Chr10.438	FSAGFGsR	0.865	0.689	0	0	0.865	0	0.855	35670.2	34949.3	30598	57501.6	54232.7	61489.7
evm.model.Chr10.447_S1008	DLDVEDIKEDSGGDDEENVAG	evm.model.Chr10.447	EDsGGDDEENVAGTSDAVR	0.97	0.961	0.97	0.968	0	0	0	28868	28984.2	30218.8	0	0	0
evm.model.Chr10.447_S1075	SNRVLAGASSSEPTLQQDSKA	evm.model.Chr10.447	VLAGASSsEPTLQQDSK	0.945	0.91	0.941	0.879	0.945	0.944	0.924	338528	326740	359365	287972	341656	364743
evm.model.Chr10.447_S1742	YRNVVAGPQVSPRRTVHSASP	evm.model.Chr10.447	NVVAGPQVsPR	1	1	1	1	1	1	1	177940	164186	155389	247220	234694	272822
evm.model.Chr10.447_S1751	VSPRRTVHSASPPVKRHPAIA	evm.model.Chr10.447	TVHSAsPPVK	0.962	0.956	0.957	0.955	0	0.952	0.962	54449.4	59895.5	30454.4	85233.4	0	33345.7
evm.model.Chr10.447_S899	GGFRPSSRPPSRAHSPHNISP	evm.model.Chr10.447	GTQPDDSFPQGGGFRPSSRPPsR	0.957	0	0	0.957	0	0	0	0	0	25045.8	0	0	0
evm.model.Chr10.447_S903	PSSRPPSRAHSPHNISPERRI	evm.model.Chr10.447	AHsPHNISPER;AHsPHNIsPER;AHsPHNIsPERR	1	1	1	1	1	1	1	459095	459868	421854	272915	292955	235962
evm.model.Chr10.447_S908	PSRAHSPHNISPERRILDEKG	evm.model.Chr10.447	AHSPHNIsPER;AHsPHNIsPER;AHsPHNIsPERR	1	1	1	1	1	1	1	424128	373902	268787	247852	258747	208064
evm.model.Chr10.45_S67	VPIVEESLDESDSEIKQPTLK	evm.model.Chr10.45	NVPIVEESLDEsDSEIK	0.961	0.961	0	0	0	0	0	22905	0	166838	0	0	0
evm.model.Chr10.460_S601	LAPKPAPVLESPFKGRDAYQL	evm.model.Chr10.460	PAPVLEsPFK	1	1	1	1	1	1	1	100567	93933.9	104809	80626.5	128441	108130
evm.model.Chr10.460_S7	****MSYNNQSPGGGGDDKSA	evm.model.Chr10.460	SYNNQsPGGGGDDK	0.954	0.954	0	0	0	0	0	13612.7	0	0	0	0	0
evm.model.Chr10.465_S181	TIPSNMRKLNSAMHLDQKTLQ	evm.model.Chr10.465	LNsAMHLDQK	1	0	0	1	0	0	0	15134.2	0	6360.93	0	0	0
evm.model.Chr10.465_S390	EKTEEEMEVKSDDKKEEKIEA	evm.model.Chr10.465	TEEEMEVKsDDKK	0.966	0	0	0.966	0	0	0	4264.32	44850.3	9248.82	17520	26783.8	0
evm.model.Chr10.465_T382	KKNGDAKEEKTEEEMEVKSDD	evm.model.Chr10.465	EEKtEEEMEVK	1	0	1	0	0	0	0	50691.5	65618.7	56572.2	25451.3	32044.6	31472.6
evm.model.Chr10.467_S165	NEIEDKVKLESEDDSNDAKGI	evm.model.Chr10.467	VKLEsEDDSNDAK	0.972	0.969	0.97	0.968	0.966	0.972	0.971	146498	142122	117709	117945	138000	108099
evm.model.Chr10.467_S2	*********MSSGDTDAQAVA	evm.model.Chr10.467	sSGDTDAQAVAVK;ssGDTDAQAVAVK	0.969	0.969	0.969	0.968	0.941	0.969	0.964	1.58069e+06	1.78163e+06	1797705	1.54756e+06	1531406	1.43069e+06
evm.model.Chr10.467_S3	********MSSGDTDAQAVAV	evm.model.Chr10.467	SsGDTDAQAVAVK;ssGDTDAQAVAVK	0.968	0.96	0.964	0.968	0	0	0.957	230330	672443	789080	116467	430413	259811
evm.model.Chr10.481.2_S225	REREREGRHPSVSPAAMNGFS	evm.model.Chr10.481.2	HPsVSPAAMNGFSR;HPsVsPAAMNGFSR	0.969	0.969	0.946	0.967	0	0	0	127497	78320	61053.9	0	0	0
evm.model.Chr10.481.2_S227	REREGRHPSVSPAAMNGFSRR	evm.model.Chr10.481.2	HPSVsPAAMNGFSR;HPsVsPAAMNGFSR	0.969	0.969	0	0.968	0	0	0	215272	172383	262772	0	0	0
evm.model.Chr10.481.2_S289	NKRRKLEKEDSDGEKSDHDLV	evm.model.Chr10.481.2	EDsDGEKsDHDLVVDVSNDER	0.968	0	0	0.968	0	0	0	0	0	138061	0	0	0
evm.model.Chr10.481.2_S294	LEKEDSDGEKSDHDLVVDVSN	evm.model.Chr10.481.2	EDsDGEKsDHDLVVDVSNDER	0.968	0	0	0.968	0	0	0	0	0	138061	0	0	0
evm.model.Chr10.481.2_S308	LVVDVSNDERSSPLNVDRHSP	evm.model.Chr10.481.2	sSPLNVDRHsPR	0.951	0.651	0.651	0.665	0.65	0.951	0	1.28551e+06	1.28197e+06	1.20794e+06	895493	958750	944380
evm.model.Chr10.481.2_S309	VVDVSNDERSSPLNVDRHSPR	evm.model.Chr10.481.2	SsPLNVDR;SsPLNVDRHsPR	0.968	0.961	0.54	0.822	0.968	0	0.675	2.27706e+06	2256123	267496	1.28676e+06	1.07947e+06	2.2133e+06
evm.model.Chr10.481.2_S317	RSSPLNVDRHSPRENGLPESS	evm.model.Chr10.481.2	SSPLNVDRHsPR;SsPLNVDRHsPR;sSPLNVDRHsPR	0.967	0.958	0.698	0.967	0.699	0.951	0	2.92438e+06	2.92328e+06	1.86951e+06	1.04859e+06	1.25657e+06	2.07055e+06
evm.model.Chr10.481.2_S360	DIPNNHAGPGSPASVGSSGSS	evm.model.Chr10.481.2	DIPNNHAGPGsPASVGSSGSSHSR	0.969	0.948	0.963	0.967	0.967	0.969	0.966	225864	336449	431916	86070.4	97497.4	105550
evm.model.Chr10.481.2_S387	VKQEHLHREPSSKSVSPQARP	evm.model.Chr10.481.2	EPssKSVsPQAR	0.769	0	0	0.769	0	0	0	0	0	30070.7	0	0	13772.2
evm.model.Chr10.481.2_S388	KQEHLHREPSSKSVSPQARPS	evm.model.Chr10.481.2	EPssKSVsPQAR	0.769	0	0	0.769	0	0	0	0	0	30070.7	0	0	13772.2
evm.model.Chr10.481.2_S392	LHREPSSKSVSPQARPSSMQS	evm.model.Chr10.481.2	EPssKSVsPQAR	0.781	0	0	0.781	0	0	0	0	0	30070.7	0	0	13772.2
evm.model.Chr10.481.2_S398	SKSVSPQARPSSMQSASGSPN	evm.model.Chr10.481.2	PsSMQSASGsPNLPR	0.96	0.96	0.611	0.602	0.608	0.605	0.595	477946	478801	445844	406836	413344	441625
evm.model.Chr10.481.2_S399	KSVSPQARPSSMQSASGSPNL	evm.model.Chr10.481.2	PSsMQSASGSPNLPR;PSsMQSASGsPNLPR;PSsMQsASGSPNLPR;PSsMQsASGsPNLPR	0.965	0.951	0	0.952	0	0.965	0	279595	547835	651903	0	610144	352502
evm.model.Chr10.481.2_S402	SPQARPSSMQSASGSPNLPRQ	evm.model.Chr10.481.2	PSSMQsASGSPNLPR;PSSMQsASGsPNLPR;PSSMQsAsGSPNLPR;PSsMQsASGSPNLPR;PSsMQsASGsPNLPR	0.963	0.83	0.961	0.952	0.963	0.959	0	224891	260087	421880	204527	212863	245332
evm.model.Chr10.481.2_S404	QARPSSMQSASGSPNLPRQTN	evm.model.Chr10.481.2	PSSMQSAsGSPNLPR;PSSMQsAsGSPNLPR	0.837	0.837	0.783	0	0	0	0	19460.4	47652.5	25500.6	0	32335	0
evm.model.Chr10.481.2_S406	RPSSMQSASGSPNLPRQTNGP	evm.model.Chr10.481.2	PSSMQSASGsPNLPR;PSSMQsASGsPNLPR;PSsMQSASGsPNLPR;PSsMQsASGsPNLPR;PsSMQSASGsPNLPR	0.972	0.964	0.962	0.963	0.968	0.961	0.972	3820438	3.75874e+06	3665468	2.76882e+06	2.9956e+06	3197336
evm.model.Chr10.522.1_S299	VGLYHFKNSASSSSLTDLREV	evm.model.Chr10.522.1	NSAsSSSLTDLR;NSAsSSsLTDLR	0.967	0.961	0.873	0	0.967	0	0	222688	163667	151917	177080	191178	123076
evm.model.Chr10.522.1_S302	YHFKNSASSSSLTDLREVGDF	evm.model.Chr10.522.1	NSASSSsLTDLR;NSAsSSsLTDLR	0.967	0.962	0.851	0.954	0.967	0	0	1.13129e+06	1.00578e+06	991041	1.0306e+06	1.07343e+06	1.01784e+06
evm.model.Chr10.522.1_S44	TSKLNESSLASQSPASKPKLC	evm.model.Chr10.522.1	LNESSLAsQSPASKPK	0.949	0	0.949	0	0.478	0	0	0	17984.2	37666.2	21198.5	27440	0
evm.model.Chr10.522.1_S46	KLNESSLASQSPASKPKLCGY	evm.model.Chr10.522.1	LNESSLASQsPASKPK;LNESSLASQsPAsKPK	0.96	0.957	0.952	0.767	0	0.948	0.96	16617.8	56942.7	40323.4	0	27440	17894
evm.model.Chr10.522.1_S49	ESSLASQSPASKPKLCGYLTK	evm.model.Chr10.522.1	LNESSLASQsPAsKPK	0.952	0	0.952	0	0	0	0	0	36443.2	29485	0	0	0
evm.model.Chr10.522.1_S972	RKNIPDPDAESDEDS******	evm.model.Chr10.522.1	KNIPDPDAEsDEDS;NIPDPDAEsDEDS	0.971	0.97	0.966	0.967	0.97	0.971	0.963	272958	278317	275803	92478.2	208681	233752
evm.model.Chr10.533_S248	KVRKTKKRGGSAAPAAPTPNG	evm.model.Chr10.533	GGsAAPAAPTPNGNAVETGTNGPVDYK;RGGsAAPAAPTPNGNAVETGTNGPVDYK	0.966	0	0.966	0.959	0	0	0	0	0	18268.5	0	0	0
evm.model.Chr10.533_S286	EETLKAMNKGSPSPGRSPRKR	evm.model.Chr10.533	AMNKGsPSPGR;AMNKGsPSPGRsPR;AMNKGsPsPGR;AMNKGsPsPGRsPR;GsPSPGRsPR;GsPsPGRsPR	1	1	1	1	1	1	1	1.03285e+06	928687	1.04752e+06	914235	919586	662137
evm.model.Chr10.533_S288	TLKAMNKGSPSPGRSPRKRAA	evm.model.Chr10.533	AMNKGSPsPGRsPR;AMNKGsPsPGR;AMNKGsPsPGRsPR;GSPsPGRsPR;GsPsPGRsPR	1	1	1	1	1	1	1	648711	1.54027e+06	1.52126e+06	1.56469e+06	1.48411e+06	1.3424e+06
evm.model.Chr10.533_S292	MNKGSPSPGRSPRKRAAKKSS	evm.model.Chr10.533	AMNKGSPsPGRsPR;AMNKGsPSPGRsPR;AMNKGsPsPGRsPR;GSPSPGRsPR;GSPsPGRsPR;GsPSPGRsPR;GsPsPGRsPR	1	1	1	1	1	1	1	3.45439e+06	3.91205e+06	3.78402e+06	4398577	4.05056e+06	3.47938e+06
evm.model.Chr10.533_T255	RGGSAAPAAPTPNGNAVETGT	evm.model.Chr10.533	GGSAAPAAPtPNGNAVETGTNGPVDYK	0.964	0	0.961	0.964	0	0	0	26009	22114.8	0	0	0	0
evm.model.Chr10.534_T167	PKYDQSMVTNTPPPTQDRDTL	evm.model.Chr10.534	YDQSMVTNtPPPTQDR	0.965	0.954	0.965	0.961	0	0	0	28910.6	30668.9	25751.2	0	0	0
evm.model.Chr10.545_S6	*****MSSAVSPAPAASDVVG	evm.model.Chr10.545	SSAVsPAPAASDVVGSNK	0.969	0.959	0.959	0	0	0.965	0.969	25481.2	25880.1	26404.4	0	27247.1	25527.1
evm.model.Chr10.565_S266	VGPKPSFVASSPKGKLKKANG	evm.model.Chr10.565	PSFVASsPK	0.968	0.95	0.968	0.959	0.964	0.968	0.966	3.13453e+06	2.99923e+06	2.94596e+06	4329871	3.47459e+06	4.39902e+06
evm.model.Chr10.565_S798	SHPSFQMTPYSGRSTPGLGEG	evm.model.Chr10.565	SHPSFQMTPYsGR	0.932	0	0	0.932	0	0	0	0	19465.6	17924.4	0	0	0
evm.model.Chr10.565_S862	PHLNPREETASPVLRQCINNN	evm.model.Chr10.565	EETAsPVLR	0.971	0.936	0.952	0.911	0.971	0.97	0.942	244003	226872	221621	407750	254676	395372
evm.model.Chr10.599_S82	RSTMVEPHRLSGIFIARGKED	evm.model.Chr10.599	LsGIFIAR	1	1	1	1	0	0	1	0	21153.9	39400.6	0	0	26065.8
evm.model.Chr10.606_S542	KLTEAEEKPASKEAEKEADNE	evm.model.Chr10.606	LTEAEEKPAsKEAEK	0.962	0.96	0	0.962	0	0	0	14833.5	7774.97	10755.7	0	0	0
evm.model.Chr10.606_S596	GNKEELKEDESVDEEVENEEN	evm.model.Chr10.606	EDEsVDEEVENEENK;EDEsVDEEVENEENKEANGQTPQTENDK	1	1	1	1	1	1	1	66129.1	76521.9	76265.3	43475.2	60446	72152
evm.model.Chr10.606_S628	NDKQRETDQDSGKGDTLEKQI	evm.model.Chr10.606	ETDQDsGKGDTLEK;ETDQDsGKGDtLEK	0.972	0.954	0.968	0.967	0.972	0.967	0.97	751073	783806	353831	825798	796056	579287
evm.model.Chr10.606_T534	DGTSEEKQKLTEAEEKPASKE	evm.model.Chr10.606	QKLtEAEEKPASK	0.965	0	0.965	0.964	0	0	0	0	20856.2	9740.55	0	0	0
evm.model.Chr10.606_T554	EAEKEADNEETPAEENTEDIE	evm.model.Chr10.606	EADNEEtPAEENTEDIEQAK	0.967	0.967	0.947	0.956	0	0	0.875	55993.9	58742.2	60113.3	0	0	37797
evm.model.Chr10.606_T560	DNEETPAEENTEDIEQAKEKK	evm.model.Chr10.606	EADNEETPAEENtEDIEQAK	0.972	0.965	0.97	0.964	0.966	0.972	0.971	158506	167901	154805	78579.9	118844	139741
evm.model.Chr10.606_T633	ETDQDSGKGDTLEKQIEETAK	evm.model.Chr10.606	ETDQDSGKGDtLEK;ETDQDsGKGDtLEK	0.971	0.969	0.969	0.967	0.97	0.959	0.971	208995	221883	223684	235529	210480	79243.3
evm.model.Chr10.607_S52	GKQLEDGRTLSDYNIQKESTL	evm.model.Chr10.607	TLsDYNIQK	0.972	0.964	0.966	0.963	0.961	0.962	0.972	248867	257373	251376	272625	291264	300281
evm.model.Chr10.623_T170	MLYQLSQNPSTLTKQIRDPRM	evm.model.Chr10.623	MLYQLSQNPStLTK	0.789	0.789	0	0	0	0	0	17134.5	0	41862.3	0	0	0
evm.model.Chr10.623_T172	YQLSQNPSTLTKQIRDPRMQN	evm.model.Chr10.623	MLYQLSQNPSTLtK	0.945	0	0	0.945	0	0	0	25663	11276.8	49782.6	0	0	0
evm.model.Chr10.623_T230	AAAPASAKPATPPPAENTQPA	evm.model.Chr10.623	PAtPPPAENTQPANIQDSLK	0.973	0.97	0.97	0.968	0.973	0.973	0.972	9948581	8797475	12200000	3.16033e+06	6576111	8.02885e+06
evm.model.Chr10.635_S1030	PDVDDEVLQKSAEDNDDVPSK	evm.model.Chr10.635	sAEDNDDVPSK	0.973	0.97	0.941	0.968	0.969	0.973	0.972	94504.7	79840.5	76735.6	90213	96961.9	91834.9
evm.model.Chr10.635_S851	LKKQQKMDVESEEEDDDFRTE	evm.model.Chr10.635	MDVEsEEEDDDFR	1	0	1	0	0	0	1	400082	388169	469604	187201	341444	345614
evm.model.Chr10.635_S924	KEKMKPARSLSSQLAGSRRNP	evm.model.Chr10.635	SLsSQLAGSR	0.966	0.965	0.965	0.939	0.954	0.966	0	26071.5	20372.2	16105.3	19767	34919.9	33639.3
evm.model.Chr10.635_T363	KRTKPNIFNDTDDEDDNKATA	evm.model.Chr10.635	TKPNIFNDtDDEDDNK	0.971	0.97	0.967	0.968	0	0	0.971	576316	582011	655900	237974	332660	356241
evm.model.Chr10.638_S424	WRRKLDSQRGSVLATELKNNS	evm.model.Chr10.638	GsVLATELK	0.967	0	0	0.967	0	0	0	0	0	9192.53	0	0	0
evm.model.Chr10.63_T315	YGGLNAGRPVTPPRNSGNKQK	evm.model.Chr10.63	FPYGGLNAGRPVtPPR	0.965	0	0	0.965	0	0	0	0	0	40878.3	0	0	0
evm.model.Chr10.649_S467	ELNSICRRRRSGTESPSYGLS	evm.model.Chr10.649	sGTESPSYGLSPNK;sGTESPSYGLSPNKR;sGTEsPSYGLSPNK;sGTEsPSYGLSPNKR;sGTEsPSYGLsPNKR	0.968	0.845	0.966	0.967	0.964	0.968	0.966	446071	436692	413208	339522	294576	332841
evm.model.Chr10.649_S471	ICRRRRSGTESPSYGLSPNKR	evm.model.Chr10.649	SGTEsPSYGLSPNK;SGTEsPSYGLSPNKR;sGTEsPSYGLSPNK;sGTEsPSYGLSPNKR;sGTEsPSYGLsPNKR	0.967	0.959	0.964	0.967	0.965	0.935	0.955	317765	304899	215816	244981	189329	284603
evm.model.Chr10.649_S477	SGTESPSYGLSPNKRSKEEEE	evm.model.Chr10.649	SGTESPSYGLsPNKR;sGTEsPSYGLsPNKR	0.887	0.648	0.887	0	0	0	0	73946.3	98936.6	0	0	0	0
evm.model.Chr10.649_S85	LSSMKPGTSGSVENLEGDDLA	evm.model.Chr10.649	PGTSGsVENLEGDDLAR	0.95	0.411	0.95	0	0	0	0	22448.7	20728.5	26047.1	0	0	0
evm.model.Chr10.649_T469	NSICRRRRSGTESPSYGLSPN	evm.model.Chr10.649	SGtESPSYGLSPNK	0.956	0	0	0.956	0	0	0	0	0	218309	0	0	0
evm.model.Chr10.653_S11	MDTDKLQDNDSEYSVATNRSE	evm.model.Chr10.653	LQDNDsEYSVATNR;LQDNDsEYsVATNR	0.972	0.964	0.97	0.968	0.968	0.972	0.971	250064	342858	350856	298089	300158	320435
evm.model.Chr10.653_S14	DKLQDNDSEYSVATNRSERSR	evm.model.Chr10.653	LQDNDSEYsVATNR;LQDNDsEYsVATNR	0.97	0.963	0.969	0.968	0.946	0.97	0.968	116818	103336	106111	70927.3	124465	72523.4
evm.model.Chr10.653_S45	RSGRRHRNRGSGNQLDGDYEG	evm.model.Chr10.653	GsGNQLDGDYEGEK;NRGsGNQLDGDYEGEK	0.971	0.969	0.929	0.968	0.937	0.97	0.971	158558	154029	151453	26506.3	76456.6	98027.1
evm.model.Chr10.653_S542	DTYRYVLHMQSETSV******	evm.model.Chr10.653	YVLHMQsETSV;YVLHMQsETsV	0.971	0.966	0.969	0.968	0.963	0.961	0.971	1210932	1.58717e+06	2.06329e+06	1.13132e+06	1.45734e+06	1.43926e+06
evm.model.Chr10.653_S545	RYVLHMQSETSV*********	evm.model.Chr10.653	YVLHMQSETsV;YVLHMQsETsV	0.972	0.966	0.969	0.969	0.963	0.961	0.972	1.20617e+06	1.49576e+06	2.02378e+06	996738	1.32569e+06	1313448
evm.model.Chr10.653_T63	YEGEKIVTIRTPPMDGRHDSR	evm.model.Chr10.653	IVTIRtPPMDGR	0.965	0.965	0.963	0	0	0	0	3585917	3173728	4.17452e+06	1.32597e+06	2399068	2.72067e+06
evm.model.Chr10.658_S278	TSEAPAFPQASPRHSVAVSKS	evm.model.Chr10.658	PANSSSADRtPTSEAPAFPQAsPR;TPTSEAPAFPQAsPR	0.968	0.968	0.956	0.967	0	0.968	0	3.32681e+06	3.21592e+06	3.41891e+06	2354866	3.38275e+06	3.62158e+06
evm.model.Chr10.658_T266	RPANSSSADRTPTSEAPAFPQ	evm.model.Chr10.658	PANSSSADRtPTSEAPAFPQASPR;PANSSSADRtPTSEAPAFPQAsPR;QLRPANSSSADRtPTSEAPAFPQASPR	0.954	0.954	0.954	0.954	0	0	0	110719	94041.4	210090	0	0	0
evm.model.Chr10.660_S1008	NEEKHEKIETSDKEADDKDEK	evm.model.Chr10.660	IETsDKEADDKDEK	0.956	0.956	0	0	0	0	0	145040	27804.8	115928	0	48585.4	0
evm.model.Chr10.660_S1870	LPLTTAPRRTSQPSFKREFMP	evm.model.Chr10.660	RTsQPSFK	0.943	0.943	0	0	0	0	0	23513.8	0	0	0	0	0
evm.model.Chr10.663_S930	TQDGFIDDGDSSDGFRKKKID	evm.model.Chr10.663	TQDGFIDDGDsSDGFR;TQDGFIDDGDsSDGFRK;TQDGFIDDGDssDGFR;TQDGFIDDGDssDGFRK	0.97	0.97	0.97	0.969	0.494	0.494	0.867	383277	763621	1.64291e+06	40636.8	135056	129062
evm.model.Chr10.663_S931	QDGFIDDGDSSDGFRKKKIDS	evm.model.Chr10.663	TQDGFIDDGDSsDGFR;TQDGFIDDGDSsDGFRK;TQDGFIDDGDssDGFR;TQDGFIDDGDssDGFRK	0.97	0.97	0.97	0.969	0.963	0.966	0.965	390487	802203	1.62444e+06	67895.3	153564	203720
evm.model.Chr10.663_S956	KSRKEKGGQLSNAESSDENEN	evm.model.Chr10.663	GGQLsNAESSDENENISK;GGQLsNAESsDENENISK;GGQLsNAEssDENENISK	0.96	0	0.96	0.959	0.879	0.81	0.95	0	103136	210179	33925.5	36180.9	35811.2
evm.model.Chr10.663_S960	EKGGQLSNAESSDENENISKK	evm.model.Chr10.663	GGQLSNAEsSDENENISK;GGQLSNAEssDENENISK;GGQLsNAEssDENENISK	0.96	0.922	0.96	0.959	0	0.372	0.444	71081.7	333181	514977	0	60091.3	34133.8
evm.model.Chr10.663_S961	KGGQLSNAESSDENENISKKP	evm.model.Chr10.663	GGQLSNAESsDENENISK;GGQLSNAEssDENENISK;GGQLsNAESsDENENISK;GGQLsNAEssDENENISK	0.96	0.933	0.96	0.959	0.943	0.81	0.949	95835.9	385111	515118	69655.9	63726	35811.2
evm.model.Chr10.663_S968	AESSDENENISKKPKLSKKPD	evm.model.Chr10.663	GGQLSNAESSDENENIsK	0.907	0	0.907	0	0	0	0.704	0	205280	0	0	0	42653.5
evm.model.Chr10.674_S345	FLSTWVLGLKSPDKPFPVKQD	evm.model.Chr10.674	sPDKPFPVK	1	1	1	1	1	1	1	273755	271429	240658	357633	319365	347314
evm.model.Chr10.674_S492	VGSVETSQGASPVKYSTETAL	evm.model.Chr10.674	LITGIQVGSVETSQGAsPVK	0.966	0	0	0.966	0	0	0	23014.2	19472.8	153467	43838.5	0	0
evm.model.Chr10.681_S288	DESKQTNEIASDDEDEFVDAS	evm.model.Chr10.681	QTNEIAsDDEDEFVDASDK	0.965	0.964	0.962	0.965	0.961	0.895	0.964	1.66535e+06	1.30914e+06	2.43158e+06	540225	489659	529494
evm.model.Chr10.681_S765	SEIVPEPVEDSA*********	evm.model.Chr10.681	LPDNNSEIVPEPVEDsA	0.973	0.969	0.971	0.969	0.969	0.973	0.973	410571	411704	796800	21939.7	160501	225977
evm.model.Chr10.682_S109	QTARSLAHGVSPAPKQSQRKA	evm.model.Chr10.682	SLAHGVsPAPK	0.972	0.96	0.945	0.901	0.964	0.953	0.972	92493.5	74824.1	71111.1	0	88688.3	75828.7
evm.model.Chr10.682_S1116	KVIEEGESSNSLGSSSRSGEV	evm.model.Chr10.682	VIEEGESSNsLGSSSR	0.966	0.934	0.966	0	0	0	0.965	29553.8	35462.7	39706	35014.3	0	30112.4
evm.model.Chr10.682_S120	PAPKQSQRKASHNDDTSSVES	evm.model.Chr10.682	AsHNDDTSSVESGIYK;KAsHNDDTSSVESGIYK;KAsHNDDTSsVESGIYK	0.971	0.966	0.88	0.959	0.963	0.971	0.969	215682	160861	175408	30925.1	96624.4	96622.3
evm.model.Chr10.682_S126	QRKASHNDDTSSVESGIYKMA	evm.model.Chr10.682	ASHNDDTssVESGIYK	0.939	0	0	0.939	0	0	0	0	0	24610.6	0	0	0
evm.model.Chr10.682_S127	RKASHNDDTSSVESGIYKMAM	evm.model.Chr10.682	ASHNDDTSsVESGIYK;ASHNDDTssVESGIYK;KAsHNDDTSsVESGIYK	0.953	0.926	0.943	0.939	0	0.953	0	34660.9	39267	24610.6	0	29337.3	22174.6
evm.model.Chr10.689_S149	GTEFDSLQAGSKKKKNMPLSF	evm.model.Chr10.689	LENGTEFDSLQAGsK	0.961	0.95	0	0.904	0	0	0.961	12567.5	0	19365.3	0	0	11010.7
evm.model.Chr10.698_S255	WNMKEEMANCSPSGALNRQQL	evm.model.Chr10.698	EEMANCsPSGALNR	0.968	0.962	0.968	0.965	0	0.93	0	61389.9	59832.6	46933.3	23847.3	58389.2	30693.8
evm.model.Chr10.711_S657	VIAVVNKKDQSPEVARSDSEP	evm.model.Chr10.711	DQsPEVAR;DQsPEVARsDSEPEKR;DQsPEVARsDsEPEKR	1	1	1	1	1	1	1	22174.3	207369	235532	31786.9	39660.4	28117.8
evm.model.Chr10.711_S663	KKDQSPEVARSDSEPEKRDDE	evm.model.Chr10.711	DQSPEVARsDsEPEKR;DQsPEVARsDSEPEKR;DQsPEVARsDsEPEKR	1	0	0	1	0	0	0	0	185181	220776	0	0	0
evm.model.Chr10.711_S665	DQSPEVARSDSEPEKRDDEKE	evm.model.Chr10.711	DQSPEVARsDsEPEKR;DQsPEVARsDsEPEKR	1	0	0	1	0	0	0	0	185181	199128	0	0	0
evm.model.Chr10.711_S772	RKYSPQRRERSPENLEKRRTK	evm.model.Chr10.711	ERsPENLEK	1	1	1	1	1	1	1	1.18576e+06	1205899	1209735	1.34461e+06	1.24258e+06	1.13787e+06
evm.model.Chr10.712_S183	NIVPVLSKADSLTLPEVKRLK	evm.model.Chr10.712	ADsLTLPEVK	0.965	0	0	0.965	0	0	0	0	0	13020.1	0	0	0
evm.model.Chr10.712_T318	PAPAMDSGGNTRALKEKEAEL	evm.model.Chr10.712	DGEPAPAMDSGGNtR	0.96	0.96	0	0	0	0	0	17163.5	0	0	0	0	0
evm.model.Chr10.714_T922	NGTEQGSDSQTEHEKPEHEKA	evm.model.Chr10.714	LDNGTEQGSDSQtEHEKPEHEK	0.952	0	0	0.952	0	0	0	0	0	11179.5	0	0	0
evm.model.Chr10.734_S310	CVLISATPRNSPSVEMAVDTA	evm.model.Chr10.734	NsPSVEMAVDTAE	0.959	0.494	0.495	0.959	0.495	0	0.953	78387.6	86487.2	120637	83507.8	0	103444
evm.model.Chr10.737_S165	STPSQKKGLRSPASSIRSLKF	evm.model.Chr10.737	GLRsPASSIR	0.972	0.968	0.964	0.966	0.967	0.972	0.958	961594	964042	911995	861999	1.22654e+06	891379
evm.model.Chr10.737_S278	SVTKKRPTVKSPGSSASSVSS	evm.model.Chr10.737	sPGSSASSVSSMSSIPSLR	0.962	0	0	0.962	0	0	0	253242	216691	468066	34511.3	79548.2	89796.3
evm.model.Chr10.737_S281	KKRPTVKSPGSSASSVSSMSS	evm.model.Chr10.737	SPGsSASSVSSMSSIPSLR	0.931	0	0	0.931	0	0	0	0	0	268944	0	0	0
evm.model.Chr10.737_S282	KRPTVKSPGSSASSVSSMSSI	evm.model.Chr10.737	SPGSsASSVSSMSSIPSLR	0.943	0	0	0.943	0	0	0	0	0	31663.8	0	0	0
evm.model.Chr10.742_S240	TEEGRKVTRNSGDKYPAVFRR	evm.model.Chr10.742	NsGDKYPAVFR	0.967	0.962	0.967	0	0	0	0	44309.7	39707.1	41986.7	0	0	0
evm.model.Chr10.746_S2221	AGKMVRRSSKSSETPPSTRST	evm.model.Chr10.746	sSETPPSTR	0.957	0.957	0	0	0	0	0	22563.9	0	0	0	0	0
evm.model.Chr10.746_S2232	SETPPSTRSTSPPSVESSARN	evm.model.Chr10.746	STsPPSVESSAR	0.946	0.768	0.768	0.946	0.776	0.775	0.769	420680	804600	687949	394563	643660	308102
evm.model.Chr10.746_S2261	VIRDRPGSHMSSRGTGGGTID	evm.model.Chr10.746	DRPGSHMsSR;DRPGSHMssR	0.964	0.923	0.962	0	0.964	0	0	70654.9	63250.5	61551.6	35457.3	29235.2	0
evm.model.Chr10.746_S2262	IRDRPGSHMSSRGTGGGTIDD	evm.model.Chr10.746	DRPGSHMssR	0.964	0	0.962	0	0.964	0	0	39380.7	41472	39878	35457.3	29235.2	0
evm.model.Chr10.746_S2650	QQEDQKMLDASATSLLRTTTN	evm.model.Chr10.746	MLDAsATSLLR	0.966	0.966	0	0	0	0	0	8527.84	0	24161.7	0	0	0
evm.model.Chr10.746_S3533	PCMNMLKRLVSPEVKSEVPSG	evm.model.Chr10.746	LVsPEVK;RLVsPEVK	1	1	1	1	1	1	1	137824	149562	185306	320802	139326	260766
evm.model.Chr10.746_T2224	MVRRSSKSSETPPSTRSTSPP	evm.model.Chr10.746	SSEtPPSTR	0.868	0	0	0.868	0	0	0	0	0	21116.6	29612.4	0	16822
evm.model.Chr10.746_T2231	SSETPPSTRSTSPPSVESSAR	evm.model.Chr10.746	StSPPSVESSAR	0.955	0	0.955	0	0	0.488	0	339997	203548	271752	330512	264810	0
evm.model.Chr10.759_S188	QKESPNVVEESDDGKVSSSSS	evm.model.Chr10.759	ESPNVVEEsDDGK	0.969	0.969	0.969	0	0	0	0.938	29227.4	29010.3	23489	0	17175.1	23448.9
evm.model.Chr10.759_S198	SDDGKVSSSSSTSEDELPTKE	evm.model.Chr10.759	VSSSSsTSEDELPTK	0.935	0.935	0	0	0	0	0	23085.1	0	16984	0	0	0
evm.model.Chr10.759_S200	DGKVSSSSSTSEDELPTKESP	evm.model.Chr10.759	VSSSSSTsEDELPTK	0.969	0.958	0.964	0.967	0.708	0.967	0.969	134545	125560	115345	106421	119426	129817
evm.model.Chr10.759_S831	KTSMRGSRPASPTSRRVVIVD	evm.model.Chr10.759	GSRPAsPTSR	0.961	0	0	0.961	0.96	0	0	38763	43973.9	39756.7	0	0	0
evm.model.Chr10.759_T301	HFTSGWKRRVTLEDLYKAGVV	evm.model.Chr10.759	RVtLEDLYK	0.895	0.895	0.884	0.842	0	0	0	41670.8	27419.6	75643.4	0	0	0
evm.model.Chr10.788_S44	SDAAARTTLISPSNFVTKLEF	evm.model.Chr10.788	TTLIsPSNFVTK	0.96	0	0	0.96	0	0	0	0	0	22641	0	0	0
evm.model.Chr10.794.1_S114	IEGVSDQLQHSPEEKNVAEDE	evm.model.Chr10.794.1	AIEGVSDQLQHsPEEK	0.97	0.955	0.968	0.961	0.97	0	0.969	417068	384922	526808	165245	258361	229943
evm.model.Chr10.794.1_T450	KEFTAQPVQLTPPDQSSSIDD	evm.model.Chr10.794.1	EFTAQPVQLtPPDQSSSIDDVSR	0.958	0	0	0.958	0	0	0	0	0	262004	0	0	0
evm.model.Chr10.798_S279	AKSLGRARRNSTPILTRNVIS	evm.model.Chr10.798	NsTPILTR;RNsTPILTR	0.97	0.966	0.964	0.962	0.97	0.967	0.953	258811	240180	206572	265440	250080	231551
evm.model.Chr10.798_S413	DDSTRADRRASPSYIREHLTI	evm.model.Chr10.798	RAsPSYIR	0.967	0	0.967	0.961	0	0	0	0	33832.2	31151.9	0	0	0
evm.model.Chr10.798_S564	GSHRVSSGETSDEESESSRTS	evm.model.Chr10.798	VSSGETsDEESESSR	0.965	0.953	0.942	0.946	0.965	0.965	0.965	94393.8	78185.4	96731.8	76086.7	85884.6	47874.9
evm.model.Chr10.803_S5	******MNRNSGDLTSVDSGA	evm.model.Chr10.803	NsGDLTSVDSGAR	0.972	0.968	0.926	0.967	0.972	0.97	0.971	54819.1	42250.7	36951.1	50832.4	40596.4	46097.4
evm.model.Chr10.816_S1880	ASNKLDRSAASVEAFRGDDSL	evm.model.Chr10.816	SAAsVEAFR	0.959	0	0.951	0	0	0	0.959	0	64385.8	28304.8	61578.8	39642.6	47368.2
evm.model.Chr10.816_S1926	APSRKLGTAVSPTSHDVLKHT	evm.model.Chr10.816	LGTAVsPTSHDVLK	0.965	0.924	0.958	0.925	0.964	0.962	0.965	74081.7	64757.1	75997	31290.9	48919.9	54140.9
evm.model.Chr10.826_S1146	FRRTGRFRIRSIHAKRVLKRS	evm.model.Chr10.826	IRsIHAK	1	1	0	1	0	1	1	18828.8	31634	30926.8	0	26283	0
evm.model.Chr10.826_S258	NIAKESVGLNSPSANKVPPVP	evm.model.Chr10.826	ESVGLNsPSANK	0.963	0.945	0	0	0.961	0.963	0.495	19980.2	0	0	32072.1	27301.1	24146.4
evm.model.Chr10.826_S377	KRGYQHLPHHSDDETPEKPVV	evm.model.Chr10.826	GYQHLPHHsDDETPEK	0.96	0.96	0.955	0	0	0	0	23586.1	23542.1	0	0	0	0
evm.model.Chr10.826_S448	EEDDFALNRLSAEMNSLRGFN	evm.model.Chr10.826	LsAEMNSLR	0.97	0	0.965	0.963	0	0.97	0	14273.7	10529.2	10618.2	0	0	0
evm.model.Chr10.826_S453	ALNRLSAEMNSLRGFNRADKG	evm.model.Chr10.826	LSAEMNsLR	0.971	0.817	0.97	0.961	0	0.971	0.946	18112.1	14953.4	14372.4	29040.3	26973.5	29473.6
evm.model.Chr10.826_S697	SSQDSSNNPPSFEDKTILETT	evm.model.Chr10.826	FITPSSQDSSNNPPsFEDK	0.966	0.898	0.966	0.95	0	0	0.966	65114.9	46772.1	81157.9	0	0	31487.4
evm.model.Chr10.826_S749	SFPSCILREKSLDSLEKLQKA	evm.model.Chr10.826	EKsLDSLEK;EKsLDsLEK	1	1	1	1	1	1	1	307816	328561	320222	316141	419951	368467
evm.model.Chr10.826_S752	SCILREKSLDSLEKLQKAISV	evm.model.Chr10.826	EKsLDsLEK	1	1	1	1	1	1	1	177135	221037	208422	197824	219250	235497
evm.model.Chr10.826_S761	DSLEKLQKAISVESPQPTDGD	evm.model.Chr10.826	AIsVESPQPTDGDK;AIsVEsPQPTDGDK	0.972	0.969	0.969	0.967	0.972	0.972	0.971	49371.3	74045.8	26798.7	37644.9	0	47835.8
evm.model.Chr10.826_S764	EKLQKAISVESPQPTDGDKGL	evm.model.Chr10.826	AISVEsPQPTDGDK;AIsVEsPQPTDGDK	0.971	0.97	0.97	0.967	0.971	0.965	0	168090	204614	191076	156418	164355	163154
evm.model.Chr10.826_S777	PTDGDKGLLASPSVEIIPRLT	evm.model.Chr10.826	GLLAsPSVEIIPR	0.967	0	0	0.967	0	0	0	0	0	11014.7	0	0	0
evm.model.Chr10.826_S859	TEPTIQPRFTSSDNLSDVDAL	evm.model.Chr10.826	FTsSDNLSDVDALEAAK	0.951	0.489	0	0.951	0	0	0	40044.1	23328.6	134394	0	0	0
evm.model.Chr10.826_S864	QPRFTSSDNLSDVDALEAAKR	evm.model.Chr10.826	FTSSDNLsDVDALEAAK	0.966	0	0	0.966	0	0	0	0	0	16990.3	0	0	0
evm.model.Chr10.826_T671	DDKKTPAEAKTPGQQESVEVA	evm.model.Chr10.826	tPGQQESVEVAK	0.972	0.969	0	0.967	0.966	0.972	0.971	73031.9	74343.7	66713.8	70644.5	73249.6	85512.3
evm.model.Chr10.82_S249	IQLAETIATKSPVAVQSVKVC	evm.model.Chr10.82	sPVAVQSVK	0.896	0.896	0	0	0	0	0	8990.54	11646.8	0	0	0	0
evm.model.Chr10.851_S1954	AKQDMKVGLPSPSSQTIKVTD	evm.model.Chr10.851	VGLPsPSSQTIK	0.971	0.958	0.97	0.968	0.969	0.94	0.971	774153	773110	836836	752598	742014	836860
evm.model.Chr10.851_S1956	QDMKVGLPSPSSQTIKVTDGG	evm.model.Chr10.851	VGLPSPsSQTIK	0.95	0	0.95	0	0	0	0	0	25687.3	34240.4	0	0	0
evm.model.Chr10.851_S245	SIMGARTFATSPSKTKNAFRN	evm.model.Chr10.851	TFATsPSK	0.96	0	0	0.899	0	0.96	0	0	0	39903.3	0	75329.2	69266.1
evm.model.Chr10.851_S923	SDGSGSGRAPSPGSYGGPTSN	evm.model.Chr10.851	APsPGSYGGPTSNLSK;APsPGsYGGPTSNLSK	0.972	0.959	0.963	0.96	0.971	0.972	0.967	994063	1.09995e+06	1.17606e+06	570121	814249	793914
evm.model.Chr10.851_S926	SGSGRAPSPGSYGGPTSNLSK	evm.model.Chr10.851	APsPGsYGGPTSNLSK	0.961	0.885	0.961	0.96	0.951	0.595	0.945	141203	219283	271955	50600.7	88254.4	89721.3
evm.model.Chr10.851_T931	APSPGSYGGPTSNLSKEDSSE	evm.model.Chr10.851	APSPGSYGGPtSNLSK	0.949	0	0	0.949	0	0	0	0	0	39461.4	0	0	0
evm.model.Chr10.904_S122	VLVEGLPRSGSWQDLKDHMRE	evm.model.Chr10.904	SGsWQDLK	0.971	0.966	0.896	0.93	0.958	0.97	0.971	144570	141635	135238	274696	253902	235030
evm.model.Chr10.905_S411	TSGKLVALSSSARCKLMEEMS	evm.model.Chr10.905	LVALSSsAR	0.937	0	0	0	0.937	0	0.901	0	0	34159.1	59949.9	0	71441.6
evm.model.Chr10.910_T69	QVEEQVEQAPTPTPKLSIPKL	evm.model.Chr10.910	DDEQVEEQVEQAPtPTPK	0.964	0.948	0.957	0.946	0	0.941	0.964	353826	588807	0	47546.2	0	134084
evm.model.Chr10.917_S20	HQQYYKNSKNSSENLRKKRQD	evm.model.Chr10.917	NSKNsSENLR	0.962	0	0	0.947	0	0	0.962	0	17168.5	16196.6	0	0	0
evm.model.Chr10.917_S58	RNINMEDLNTSPLKEMNRQDA	evm.model.Chr10.917	NINMEDLNTsPLK	0.973	0.961	0.97	0.969	0.972	0.973	0.972	1.7554e+06	1.51374e+06	2981248	888808	1.22974e+06	1.49565e+06
evm.model.Chr10.917_T57	RRNINMEDLNTSPLKEMNRQD	evm.model.Chr10.917	NINMEDLNtSPLK	0.921	0.5	0.5	0.921	0.5	0	0	0	353912	0	71912.5	159739	0
evm.model.Chr10.921_S226	KSLTGTARYMSINTHLGKEQS	evm.model.Chr10.921	YMsINTHLGK	0.966	0.961	0.962	0.598	0.958	0.966	0.962	28715.8	22955.6	18048.8	26034.4	33160.1	26888
evm.model.Chr10.921_S344	DWSGKPLQSSSQVAEVSRNHP	evm.model.Chr10.921	PLQSSsQVAEVSR	0.965	0.964	0.964	0.96	0	0.964	0.965	89703	102253	90716.9	105493	115058	142992
evm.model.Chr10.921_S350	LQSSSQVAEVSRNHPQQQRPR	evm.model.Chr10.921	PLQSSSQVAEVsR	0.97	0.966	0.962	0.951	0.97	0.964	0.969	25425.2	6900.53	7910.3	32000	25527.1	33325.3
evm.model.Chr10.922_S413	RPDAMMSRRMSNVDDGTSAWG	evm.model.Chr10.922	MsNVDDGTSAWGDPTTYNK;RMsNVDDGTSAWGDPTTYNK	0.967	0.967	0.967	0.967	0	0	0	163902	107777	202475	0	0	0
evm.model.Chr10.922_S473	GVPTNQNQPPSPKNWGTTSPT	evm.model.Chr10.922	GWGVPTNQNQPPsPK	0.974	0.969	0.966	0.967	0.974	0.973	0.971	2.6322e+06	2.58034e+06	2840552	1.32816e+06	1.98755e+06	2.30209e+06
evm.model.Chr10.922_S481	PPSPKNWGTTSPTRMAGDAGN	evm.model.Chr10.922	NWGTTsPTR	0.968	0.967	0.968	0.953	0.948	0.964	0.962	1.39555e+06	1.39305e+06	1.27448e+06	2045879	1.58476e+06	1.8361e+06
evm.model.Chr10.922_S774	GGDFNGMRFESPQDEMPTHLD	evm.model.Chr10.922	FEsPQDEMPTHLDK	0.971	0.932	0.968	0.968	0.971	0.971	0.97	198634	188559	287956	37634.2	90283.4	59745.2
evm.model.Chr10.922_S840	WKGFRRIDPESDPDITPGSVA	evm.model.Chr10.922	IDPEsDPDITPGSVAIAK	0.969	0.968	0.969	0.964	0	0	0	20458.9	13993.7	38233.3	0	0	0
evm.model.Chr10.932_S407	ERAGRVTCLGSPMREGSVSLV	evm.model.Chr10.932	VTCLGsPMR	0.971	0.873	0	0.966	0	0.971	0	17409.6	0	0	0	21464	0
evm.model.Chr10.99_S599	SAITTEPNAVSDAESA*****	evm.model.Chr10.99	SAITTEPNAVsDAESA;SAITTEPNAVsDAEsA	0.97	0	0.97	0	0	0	0	548046	843095	1.14775e+06	0	383757	0
evm.model.Chr10.99_S603	TEPNAVSDAESA*********	evm.model.Chr10.99	SAITTEPNAVSDAEsA;SAITTEPNAVsDAEsA	0.97	0	0.97	0	0	0	0	0	590921	815930	0	0	0
evm.model.Chr11.108_S12	PQGKIEDRLRSVAQDAPAVPE	evm.model.Chr11.108	LRsVAQDAPAVPEK	1	0	0	1	0	0	0	13979.8	0	16637.3	0	0	0
evm.model.Chr11.109_Y187	ARLTDDQMTGYVATRWYRAPE	evm.model.Chr11.109	LTDDQMTGyVATR	0.971	0.958	0	0	0.971	0.971	0.964	218234	229121	221943	140005	173324	168294
evm.model.Chr11.126_S269	LTTSPRAVVASPLEQEDTEDG	evm.model.Chr11.126	AVVAsPLEQEDTEDGLSER	0.969	0.969	0.967	0.968	0	0	0.967	79283.1	58264.3	121530	0	0	21475.7
evm.model.Chr11.126_S443	NKPPGFGRPGSPLMPSQLQEQ	evm.model.Chr11.126	PGsPLMPSQLQEQLTK	0.971	0.969	0.97	0.968	0.97	0	0.971	255307	157129	901644	21715.5	41949.6	73511.4
evm.model.Chr11.150_T128	RPSTTSNRRQTPPSGTSSGGN	evm.model.Chr11.150	RQtPPSGTSSGGNR	0.973	0.969	0.951	0.968	0.973	0.972	0.972	115223	115998	111002	73297.6	74683.6	54182.2
evm.model.Chr11.163_S325	EENSPERTSRSPVYEPFTPDI	evm.model.Chr11.163	sPVYEPFTPDIPK;sPVYEPFtPDIPK	0.97	0.97	0.969	0.966	0	0	0	129169	60296.8	322178	0	0	0
evm.model.Chr11.163_S338	YEPFTPDIPKSPGTPTYDDYG	evm.model.Chr11.163	sPGTPTYDDYGADR;sPGtPTYDDYGADR	0.972	0.97	0.969	0.968	0.972	0.952	0.971	175901	161603	189489	30575.3	39041.7	45659.5
evm.model.Chr11.163_S4	*******MGDSSPPAKRIRIS	evm.model.Chr11.163	GDsSPPAKR	0.946	0.946	0	0	0	0.5	0	0	0	60078.5	0	86291.4	0
evm.model.Chr11.163_S5	******MGDSSPPAKRIRISN	evm.model.Chr11.163	GDSsPPAKR	0.956	0	0	0.956	0.927	0	0.94	0	88161.2	62439.4	82178.7	103191	69061.1
evm.model.Chr11.163_T332	TSRSPVYEPFTPDIPKSPGTP	evm.model.Chr11.163	sPVYEPFtPDIPK	0.961	0	0	0.961	0	0	0	0	0	8938.57	0	0	0
evm.model.Chr11.163_T341	FTPDIPKSPGTPTYDDYGADR	evm.model.Chr11.163	SPGtPTYDDYGADR;sPGtPTYDDYGADR	0.972	0.968	0.961	0.946	0.972	0.965	0.948	174143	189307	181110	104274	105449	116454
evm.model.Chr11.174_S131	DLVECHRLKSSFYSGDKHHEE	evm.model.Chr11.174	LKSsFYSGDK	0.958	0.954	0.948	0	0.958	0	0.939	0	22718.7	0	36772.5	25956.8	28288.3
evm.model.Chr11.174_S656	EEQSRMIQSASIDDDNKVCDV	evm.model.Chr11.174	MIQSAsIDDDNK	0.969	0.965	0.969	0	0	0.962	0	169450	196701	129480	0	157670	167540
evm.model.Chr11.175_S119	GRMRPGLLYESDEEDGARPSR	evm.model.Chr11.175	MRPGLLYEsDEEDGAR;MRPGLLYEsDEEDGARPSR;PGLLYEsDEEDGAR;PGLLYEsDEEDGARPSR	0.97	0.97	0.97	0.968	0.968	0.969	0.965	1464908	1342365	1.86697e+06	477704	702668	847109
evm.model.Chr11.175_S360	QNYQRISIQESPGKIAAGRLP	evm.model.Chr11.175	ISIQEsPGK	0.973	0.965	0.969	0.966	0.973	0.962	0.972	192539	181132	175712	213143	192410	201125
evm.model.Chr11.175_Y117	GKGRMRPGLLYESDEEDGARP	evm.model.Chr11.175	MRPGLLyESDEEDGAR	0.969	0.969	0.942	0.926	0	0.94	0	678343	477030	1.02016e+06	68345.2	161984	178919
evm.model.Chr11.193_S391	SYYLDREAGRSPGDAVHKIYP	evm.model.Chr11.193	EAGRsPGDAVHK	1	1	1	1	1	0	1	23306.8	33810.9	21535.3	0	0	0
evm.model.Chr11.203_S101	VVDSNDCERISEASDELHRML	evm.model.Chr11.203	IsEASDELHR	0.968	0.968	0.962	0	0	0.967	0.967	31434.2	30203.3	24915.5	32992.3	33807.3	35355.9
evm.model.Chr11.203_S135	ANKQDLPNALSTTALTEKLNL	evm.model.Chr11.203	QDLPNALsTTALTEK	0.954	0.486	0.944	0.954	0	0	0	10509.7	7488.28	29065.4	0	0	0
evm.model.Chr11.203_S147	TALTEKLNLHSLRNRNWFIQS	evm.model.Chr11.203	LNLHsLR	1	0	1	1	0	0	0	0	11473.9	14013.4	0	0	0
evm.model.Chr11.205_S295	KSEPTPVITTSPTPETDLKRR	evm.model.Chr11.205	SEPTPVITTsPTPETDLK	0.914	0.914	0	0	0	0	0	22604.4	0	0	0	0	0
evm.model.Chr11.205_S319	RDKKATDLSHSPTQKTTKTNS	evm.model.Chr11.205	ATDLSHsPTQK	0.971	0.961	0.96	0.94	0.969	0.971	0.95	129364	139679	91507.8	136812	157240	100890
evm.model.Chr11.205_T297	EPTPVITTSPTPETDLKRRSS	evm.model.Chr11.205	SEPTPVITTSPtPETDLK	0.952	0	0	0.952	0	0	0	0	0	8993.28	0	0	0
evm.model.Chr11.209_S30	TARIPKPKFKSPPTSPTNPTG	evm.model.Chr11.209	FKsPPTSPTNPTGPGVENSPQVNQLTQNR	0.813	0	0	0.813	0	0	0	0	0	176250	0	0	0
evm.model.Chr11.209_S302	VKTSEQWETFSERTNSSTNLA	evm.model.Chr11.209	TSEQWETFsER	0.97	0.966	0.97	0.963	0.97	0.969	0.97	83848.9	76243.9	82651.2	39270.4	72991.5	60867.7
evm.model.Chr11.209_S351	LWKVVGDARKSPIDPLPSGET	evm.model.Chr11.209	KsPIDPLPSGETLDEESTTSSPQIR;KsPIDPLPSGETLDEESTTSsPQIR	0.968	0	0	0.968	0	0	0	0	0	35947.2	0	0	0
evm.model.Chr11.209_S370	ETLDEESTTSSPQIRSKHGVT	evm.model.Chr11.209	KsPIDPLPSGETLDEESTTSsPQIR	0.963	0	0	0.963	0	0	0	0	0	19850.8	0	0	0
evm.model.Chr11.209_S420	NSTDSKDSRNSGFDEKPFRKT	evm.model.Chr11.209	NsGFDEKPFR	1	1	1	1	1	1	1	305909	313085	310154	270862	296546	308418
evm.model.Chr11.209_S526	SPKPGSSKSNSLDKNEAKVGL	evm.model.Chr11.209	SNsLDKNEAK	0.967	0.967	0	0.866	0.964	0.932	0.945	94045.5	87301.1	84513.5	123310	98100.3	72959.1
evm.model.Chr11.209_T547	KDPESRLDGPTPPPRPHPATS	evm.model.Chr11.209	LDGPtPPPR	1	0	0	0	1	0	0	0	0	0	15020.4	0	0
evm.model.Chr11.219_S16	RKRNVETENASEAEPEDRLSD	evm.model.Chr11.219	NVETENAsEAEPEDR	0.974	0.97	0.969	0.968	0.974	0.973	0.967	371710	346181	320341	264003	288815	287830
evm.model.Chr11.219_S25	ASEAEPEDRLSDSSVVGGNAS	evm.model.Chr11.219	LsDSSVVGGNASEPPKPK;NVETENASEAEPEDRLsDSSVVGGNASEPPKPK	0.96	0.957	0.902	0	0	0.433	0.96	79769.6	100561	70104.8	0	36551.4	72089.2
evm.model.Chr11.239_T181	DPEHDHTGFLTEYVATRWYRA	evm.model.Chr11.239	VADPEHDHTGFLtEyVATR	0.915	0.897	0	0.915	0	0	0	18697.7	0	122078	0	0	0
evm.model.Chr11.239_Y183	EHDHTGFLTEYVATRWYRAPE	evm.model.Chr11.239	VADPEHDHTGFLtEyVATR	0.915	0.896	0	0.915	0	0	0	18697.7	0	122078	0	0	0
evm.model.Chr11.247_S237	DNLTLWTSDASGDQEED****	evm.model.Chr11.247	DNLTLWTSDAsGDQEED	0.964	0	0	0.964	0	0	0	0	0	7761.43	0	0	0
evm.model.Chr11.275_S417	NSFQQPPRGNSPGGYMQGAPP	evm.model.Chr11.275	GNsPGGYMQGAPPPSAANPHR	0.964	0.948	0.958	0.964	0	0	0	83551.9	116881	158246	0	0	0
evm.model.Chr11.303_S480	TLRKKHADTSSEMSEQIDNLQ	evm.model.Chr11.303	HADTSsEMSEQIDNLQR	0.95	0	0	0.95	0	0	0	0	0	62212.9	0	0	0
evm.model.Chr11.303_S560	NELNAAKARLSSENGEFGRQL	evm.model.Chr11.303	ARLsSENGEFGR	0.96	0.938	0.96	0	0	0	0	25120	23880.1	21789	0	17269.1	22702.9
evm.model.Chr11.303_S561	ELNAAKARLSSENGEFGRQLE	evm.model.Chr11.303	LSsENGEFGR	0.971	0.944	0.962	0.933	0.956	0.971	0.971	138095	144177	127398	226294	172030	194074
evm.model.Chr11.303_S716	DLTIDLERSNSAAAALDKKQR	evm.model.Chr11.303	SNsAAAALDK;SNsAAAALDKK	0.966	0.935	0.965	0.955	0.959	0.966	0.962	100407	129307	120038	176720	231024	128847
evm.model.Chr11.303_S856	QIKQEFERRLSEKEEELDNQR	evm.model.Chr11.303	RLsEKEEELDNQR	1	1	1	1	0	1	0	145376	57400.4	195671	0	25112.9	0
evm.model.Chr11.303_S872	LDNQRRNQQRSIESMQTTLDS	evm.model.Chr11.303	sIESMQTTLDSESK	0.968	0.968	0.966	0.967	0	0	0	10553.5	5390.53	16901.6	0	0	0
evm.model.Chr11.321_S255	IFKEWALVENSPLKEALQKSS	evm.model.Chr11.321	EWALVENsPLK	1	1	1	1	0	0	0	10188.9	10925.2	20764.6	0	0	0
evm.model.Chr11.322_S76	SKFSSHPPAPSPPAKLDPAAA	evm.model.Chr11.322	FSSHPPAPsPPAK	0.972	0.965	0.969	0	0	0.885	0.972	69950.1	68028.7	64291.4	41548.4	58885.8	64257.8
evm.model.Chr11.327_S141	KTESKVDDKDSDDDEDSKGKL	evm.model.Chr11.327	VDDKDsDDDEDSK;VDDKDsDDDEDSKGK	0.971	0.967	0.969	0.927	0.971	0.968	0.869	13938.5	35472.3	10762.2	0	0	0
evm.model.Chr11.339_S86	VKFQRAIQGASWGEIVAKRNQ	evm.model.Chr11.339	AIQGAsWGEIVAK	1	1	1	1	0	1	1	97936.8	66612.5	195578	0	25140.3	26391.5
evm.model.Chr11.343_S354	NQEEQYQDRRSQSPPLGEPEI	evm.model.Chr11.343	sQsPPLGEPEIEEIMIR	1	0	0	1	0	0	0	0	0	6480.37	0	0	0
evm.model.Chr11.343_S356	EEQYQDRRSQSPPLGEPEIEE	evm.model.Chr11.343	SQsPPLGEPEIEEIMIR;sQsPPLGEPEIEEIMIR	1	0	0	1	0	0	0	0	0	6480.37	0	0	0
evm.model.Chr11.364_S309	RNPGNRLGSGSDGVEEIKRHP	evm.model.Chr11.364	LGSGsDGVEEIKR	0.952	0.952	0	0	0	0	0	10824.8	18107.1	0	0	0	0
evm.model.Chr11.364_S341	RKDIDPPFKPSVTRAEDAAYF	evm.model.Chr11.364	DIDPPFKPsVTR;KDIDPPFKPsVTR	0.958	0.869	0	0.958	0	0	0.956	169834	184203	176068	21727.8	95222.5	106282
evm.model.Chr11.364_S363	SEFTSRTPRDSPGVPASAAAQ	evm.model.Chr11.364	DsPGVPASAAAQQLFR;DsPGVPAsAAAQQLFR;TPRDsPGVPASAAAQQLFR;tPRDsPGVPASAAAQQLFR	1	1	1	1	0.974	0.972	0.973	2.28835e+06	1.39234e+06	5.42906e+06	195247	354760	444058
evm.model.Chr11.364_S369	TPRDSPGVPASAAAQQLFRGF	evm.model.Chr11.364	DSPGVPAsAAAQQLFR;DsPGVPAsAAAQQLFR	1	1	1	1	0	0	0	21324.3	8517.93	110146	0	0	0
evm.model.Chr11.364_S411	KNQGIPQRDLSGTALLTNRLN	evm.model.Chr11.364	DLsGTALLTNR	0.972	0.966	0.957	0.956	0.972	0.969	0.963	77129.1	79010	114523	44675.7	59749.5	70385.2
evm.model.Chr11.364_S650	KRIETGKFNMSGGNWKSVSDI	evm.model.Chr11.364	FNMsGGNWK	1	1	0	0	1	1	1	119262	72605.1	80833.3	37566	121244	51569.1
evm.model.Chr11.364_S72	FELLKVLGQGSFGKVFLVRKI	evm.model.Chr11.364	VLGQGsFGK	1	1	1	1	0	0	1	0	16436.1	13408	0	0	0
evm.model.Chr11.364_T359	AYFDSEFTSRTPRDSPGVPAS	evm.model.Chr11.364	tPRDSPGVPASAAAQQLFR;tPRDsPGVPASAAAQQLFR	0.966	0	0.94	0.966	0	0	0	212404	30388.4	986829	0	0	0
evm.model.Chr11.36_S388	QTSKPVQRTTSEESEVLRALR	evm.model.Chr11.36	TTsEESEVLR	0.925	0	0.925	0	0	0	0	216754	210139	186559	254679	221156	228502
evm.model.Chr11.385_S549	PSKRGRKRMGSNDSLVLPPKA	evm.model.Chr11.385	MGsNDSLVLPPK;MGsNDsLVLPPK	1	0.967	1	1	0.97	1	0.969	1.76274e+06	1.87216e+06	2.05608e+06	611324	1.06514e+06	1.21664e+06
evm.model.Chr11.385_S552	RGRKRMGSNDSLVLPPKATKL	evm.model.Chr11.385	MGsNDsLVLPPK	1	0	1	1	0	1	0	0	43961.2	48810.8	0	21914.2	27902.2
evm.model.Chr11.385_S573	EQEIEEDGDESDFSPPTKTDM	evm.model.Chr11.385	LEQEIEEDGDEsDFsPPTK	0.966	0.958	0	0.966	0	0	0	32753	30823.7	264241	0	0	0
evm.model.Chr11.385_S576	IEEDGDESDFSPPTKTDMPRV	evm.model.Chr11.385	LEQEIEEDGDESDFsPPTK;LEQEIEEDGDEsDFsPPTK	0.966	0.958	0.915	0.966	0	0	0	249494	103484	799160	50441.3	0	0
evm.model.Chr11.407_S150	SLKDPEESQESELDPDKENKA	evm.model.Chr11.407	DPEESQEsELDPDKENK	0.895	0	0	0.895	0	0	0	0	0	19855.9	0	0	0
evm.model.Chr11.407_S16	QDSTAITEPISTDETDKTTTT	evm.model.Chr11.407	QDSTAITEPIsTDETDK	0.96	0.577	0.955	0.945	0.478	0.93	0.96	62373.3	63621.1	60579.7	30175.8	43843	45021.1
evm.model.Chr11.407_S177	TATPKFMDYRSVLDQDMAEYK	evm.model.Chr11.407	sVLDQDMAEYK	0.969	0.969	0.969	0	0	0	0	0	20601.2	0	0	0	0
evm.model.Chr11.407_S218	YKTEDERDTESEVEVEETEDT	evm.model.Chr11.407	DTEsEVEVEETEDTHR;DTEsEVEVEETEDTHRK;DtEsEVEVEETEDTHR;TEDERDTEsEVEVEETEDTHR;TEDERDtEsEVEVEETEDTHR;TEDERDtEsEVEVEETEDTHRK	0.971	0.969	0.97	0.968	0.971	0.97	0.97	7190705	6059943	10400000	1.40244e+06	1.33105e+06	1.50502e+06
evm.model.Chr11.407_T115	EEEVDFRVEETLLGESKFYKL	evm.model.Chr11.407	VEEtLLGESK	0.967	0.967	0.942	0	0	0	0	0	16377	0	0	0	17467.3
evm.model.Chr11.407_T169	KAGNDDTVTATPKFMDYRSVL	evm.model.Chr11.407	AGNDDTVTAtPK	0.97	0.962	0.962	0.965	0.97	0.97	0.948	53467.2	48382.9	42601.8	84930	83309.5	80569.9
evm.model.Chr11.407_T17	DSTAITEPISTDETDKTTTTK	evm.model.Chr11.407	QDSTAITEPIStDETDK	0.958	0	0	0.958	0	0	0	19595.1	0	22667.3	0	0	0
evm.model.Chr11.407_T210	GETLSDVEYKTEDERDTESEV	evm.model.Chr11.407	tEDERDtESEVEVEETEDTHRK	0.925	0	0	0.925	0	0	0	0	105364	149350	0	0	0
evm.model.Chr11.407_T216	VEYKTEDERDTESEVEVEETE	evm.model.Chr11.407	DtEsEVEVEETEDTHR;TEDERDtESEVEVEETEDTHR;TEDERDtESEVEVEETEDTHRK;TEDERDtEsEVEVEETEDTHR;TEDERDtEsEVEVEETEDTHRK;tEDERDtESEVEVEETEDTHRK	0.971	0.97	0.97	0.968	0.971	0.965	0.962	6406275	4.97333e+06	9656783	1365028	614459	713284
evm.model.Chr11.417_S38	KDHPIKIVDLSTSKTGKHGHA	evm.model.Chr11.417	IVDLsTSK	0.949	0	0.949	0	0	0	0	0	14937.4	0	0	24224.3	39041.7
evm.model.Chr11.417_S6	*****MAENASGASLTYPKQC	evm.model.Chr11.417	AENAsGASLTYPK	0.97	0.964	0	0	0.97	0	0	169035	162984	168209	23792.3	19260.8	0
evm.model.Chr11.417_S9	**MAENASGASLTYPKQCSAL	evm.model.Chr11.417	AENASGAsLTYPK	0.97	0.949	0.947	0.677	0.951	0.956	0.97	212299	198566	194559	198193	237811	223005
evm.model.Chr11.447_S1067	SDKSTREPVTSPERLSHMKWE	evm.model.Chr11.447	EPVTsPER	0.97	0.967	0.949	0.967	0.97	0.966	0.932	115118	118922	105755	154268	179482	146839
evm.model.Chr11.447_S1116	NHFSKYGLPESDDEPEVVVKP	evm.model.Chr11.447	YGLPEsDDEPEVVVKPPPK	0.97	0.97	0.97	0.969	0	0	0	673742	143882	1.8431e+06	0	0	0
evm.model.Chr11.447_S1225	VPCSVDDGARSFNDSVRTPIR	evm.model.Chr11.447	sFNDSVR;sFNDSVRtPIR;sFNDsVRtPIR	1	0.928	1	0.968	0.973	0.961	0.972	52474.1	78432.1	134532	105123	106412	96680.7
evm.model.Chr11.447_S1229	VDDGARSFNDSVRTPIRKIEK	evm.model.Chr11.447	sFNDsVRtPIR	1	0	1	0	0	0	0	16569.1	29125.5	37042.3	0	0	0
evm.model.Chr11.447_S226	GSTVECLKMNSDDQGIVEEQK	evm.model.Chr11.447	MNsDDQGIVEEQK;MNsDDQGIVEEQKEQPK	1	1	1	1	1	1	1	230646	203065	213625	151396	151252	194512
evm.model.Chr11.447_S783	NPAAQKAAIQSPVYRVSPAPV	evm.model.Chr11.447	AAIQsPVYR;AAIQsPVYRVsPAPVNK	0.972	0.971	0.971	0.969	0.972	0.971	0.972	1109132	916306	1.0052e+06	1.21617e+06	1.0292e+06	1.17718e+06
evm.model.Chr11.447_S789	AAIQSPVYRVSPAPVNKIKPK	evm.model.Chr11.447	AAIQsPVYRVsPAPVNK;VsPAPVNK	1	1	1	1	1	1	1	150977	45691.4	169404	35440.4	60825.2	61483.5
evm.model.Chr11.447_T1232	GARSFNDSVRTPIRKIEKIFF	evm.model.Chr11.447	SFNDSVRtPIR;SFNDSVRtPIRK;sFNDSVRtPIR;sFNDsVRtPIR	1	0.96	1	0.957	0.941	0	0.95	105408	152643	250172	144417	115527	91353.3
evm.model.Chr11.448_S21	VFKVPTLVNNSPITKLIKPPL	evm.model.Chr11.448	VPTLVNNsPITK	0.967	0.967	0.957	0.958	0.962	0.951	0.925	123444	130208	135926	130048	147287	161571
evm.model.Chr11.448_S350	KQWEKDDFYDSDEDGYLDRTG	evm.model.Chr11.448	DDFYDsDEDGYLDR	0.971	0.969	0.97	0.965	0.97	0.971	0.97	547840	338444	1.03932e+06	30475.8	78683.1	85796.2
evm.model.Chr11.44_S206	QNPHRTDPPESPTSPTNKSTF	evm.model.Chr11.44	TDPPEsPTSPTNK;TDPPEsPTsPTNK	0.942	0	0	0.942	0	0.8	0	163416	127462	190306	0	135196	0
evm.model.Chr11.44_S209	HRTDPPESPTSPTNKSTFRGS	evm.model.Chr11.44	TDPPESPTsPTNK;TDPPEsPTsPTNK	0.948	0	0	0.948	0	0.719	0	578210	640276	564808	392116	340784	342372
evm.model.Chr11.44_S54	TLEPWTGGGDSGEIGGLEEEK	evm.model.Chr11.44	TLEPWTGGGDsGEIGGLEEEK	0.949	0	0	0.949	0	0	0	0	0	14702.4	0	0	0
evm.model.Chr11.479_S228	EESALRVKFNSLQEEADLRNT	evm.model.Chr11.479	FNsLQEEADLR	1	0	0	1	0	0	0	13221.4	0	15066.5	0	0	0
evm.model.Chr11.479_S625	DELAHMRSQLSESEESIGELR	evm.model.Chr11.479	SQLsESEESIGELR	0.962	0	0	0.962	0	0	0	0	0	21794.2	0	0	0
evm.model.Chr11.501_T353	GKAKKTTKAKTPVQSATEDLN	evm.model.Chr11.501	AKtPVQSATEDLNPNR	0.96	0.956	0.96	0.949	0	0	0	67636.4	46877.7	84944.2	0	0	0
evm.model.Chr11.501_T477	KVFIEGVPQVTPDEKLNPKKK	evm.model.Chr11.501	VFIEGVPQVtPDEK	1	1	1	1	0	1	1	73749.7	40209.4	192182	0	9442.73	17696.7
evm.model.Chr11.537_S379	GQIHEQLEDTSSDYEREKLNE	evm.model.Chr11.537	IGQIHEQLEDTsSDYER	0.915	0	0	0.915	0	0	0	0	0	13280.7	0	0	0
evm.model.Chr11.537_S407	GVAVLKVGGSSEVEVNEKKDR	evm.model.Chr11.537	VGGSsEVEVNEK	0.955	0.955	0.935	0	0.928	0.923	0	70751.2	66126.9	67557.6	82322.1	80907.7	84320.9
evm.model.Chr11.537_S64	PKGRNVILEQSWGSPKVTKDG	evm.model.Chr11.537	NVILEQsWGSPK	0.965	0.965	0	0.925	0	0	0	19546.6	0	390943	0	0	0
evm.model.Chr11.537_S67	RNVILEQSWGSPKVTKDGVTV	evm.model.Chr11.537	NVILEQSWGsPK	0.969	0.951	0.969	0.968	0.884	0.877	0.969	275213	180414	56409.2	55868.9	93952.1	104662
evm.model.Chr11.550_S540	STTSTRRTNHSPSLSIGSKSN	evm.model.Chr11.550	TNHsPSLSIGSK;TNHsPSLSIGsK;TNHsPSLsIGSK	0.961	0.961	0.949	0.921	0.597	0.901	0.892	186584	176411	172421	199114	139093	205562
evm.model.Chr11.550_S542	TSTRRTNHSPSLSIGSKSNQS	evm.model.Chr11.550	TNHSPsLsIGSK	0.879	0.879	0	0	0	0	0	54414.5	50189	44836.4	0	0	0
evm.model.Chr11.550_S544	TRRTNHSPSLSIGSKSNQSDD	evm.model.Chr11.550	TNHSPSLsIGsK;TNHSPsLsIGSK;TNHsPSLsIGSK	0.958	0.87	0.958	0.729	0.73	0	0.9	109022	182913	150861	45567.9	0	46003.8
evm.model.Chr11.550_S547	TNHSPSLSIGSKSNQSDDEFP	evm.model.Chr11.550	TNHSPSLSIGsK;TNHSPSLsIGsK;TNHsPSLSIGsK	0.959	0	0.959	0	0	0.959	0	120643	144469	118849	50268.4	99566.3	50179
evm.model.Chr11.550_S552	SLSIGSKSNQSDDEFPAPPSP	evm.model.Chr11.550	SNQsDDEFPAPPSPLTNQNTSV	0.965	0	0	0.965	0	0	0	0	0	37590.2	0	0	0
evm.model.Chr11.579_S153	IGNVKVRRIYSGTGLKEVPYT	evm.model.Chr11.579	IYsGTGLK;RIYsGTGLK	0.968	0.918	0.968	0.941	0.968	0.957	0.508	250413	195990	241616	391212	203461	354186
evm.model.Chr11.579_S312	FRTNSRPRHESVFYSTAPSAP	evm.model.Chr11.579	HEsVFYSTAPSAPSNK	0.965	0.965	0.961	0.963	0	0	0	413627	387237	471613	115669	250445	250784
evm.model.Chr11.579_S323	VFYSTAPSAPSNKYYDDGNFY	evm.model.Chr11.579	HESVFYSTAPSAPsNK	0.956	0.864	0.943	0.926	0.904	0.956	0.878	140778	0	151986	34466	45537.6	64912.6
evm.model.Chr11.579_S335	KYYDDGNFYPSLGVPVRIANG	evm.model.Chr11.579	YYDDGNFYPsLGVPVR	0.967	0	0	0.967	0	0	0	0	0	16246.2	0	0	0
evm.model.Chr11.579_S354	NGKFPQYQNSSDHATKRVQIH	evm.model.Chr11.579	FPQYQNSsDHATK	0.913	0.913	0	0.865	0	0	0	259458	278569	227499	0	190918	0
evm.model.Chr11.579_S377	DQNNMVKENLSETASVKSYV*	evm.model.Chr11.579	ENLsETASVK;ENLsETAsVK;ENLsETAsVKsYV	0.973	0.968	0.97	0.967	0.972	0.973	0.97	2.83386e+06	2.59654e+06	4082543	4881839	4.22541e+06	5931839
evm.model.Chr11.579_S381	MVKENLSETASVKSYV*****	evm.model.Chr11.579	ENLSETAsVK;ENLSETAsVKsYV;ENLSEtAsVK;ENLsETAsVK;ENLsETAsVKsYV	0.972	0.968	0.97	0.966	0.972	0.971	0.971	2.61964e+06	2.24119e+06	3.60508e+06	3.79406e+06	3.24125e+06	5242224
evm.model.Chr11.579_S384	ENLSETASVKSYV********	evm.model.Chr11.579	ENLSETAsVKsYV;ENLsETAsVKsYV	0.956	0.703	0.955	0.956	0.611	0.611	0.703	168794	309405	1.19366e+06	46028.4	66251.4	20495.6
evm.model.Chr11.579_T358	PQYQNSSDHATKRVQIHEEDQ	evm.model.Chr11.579	FPQYQNSSDHAtK	0.954	0.85	0	0.954	0	0	0	32669.2	0	67214.9	23927.9	0	0
evm.model.Chr11.579_T379	NNMVKENLSETASVKSYV***	evm.model.Chr11.579	ENLSEtAsVK	0.967	0	0	0	0.967	0	0.966	47388.2	48029	42675.8	31579.3	0	47963.7
evm.model.Chr11.579_Y152	SIGNVKVRRIYSGTGLKEVPY	evm.model.Chr11.579	IySGTGLK;RIySGTGLK	0.969	0.966	0.962	0.966	0.96	0.969	0	97380.1	94588	17729.5	0	84335.3	0
evm.model.Chr11.579_Y315	NSRPRHESVFYSTAPSAPSNK	evm.model.Chr11.579	HESVFySTAPSAPSNK	0.968	0.953	0.964	0.954	0.956	0.968	0.961	147275	155508	159033	46280.3	90704.4	74660.8
evm.model.Chr11.579_Y333	SNKYYDDGNFYPSLGVPVRIA	evm.model.Chr11.579	YYDDGNFyPSLGVPVR	0.961	0	0	0.961	0	0	0	0	0	8498	0	0	0
evm.model.Chr11.579_Y350	VRIANGKFPQYQNSSDHATKR	evm.model.Chr11.579	FPQyQNSSDHATK	0.964	0.964	0.736	0.961	0	0.446	0	25901.7	33871.3	23883.6	0	0	0
evm.model.Chr11.89_S836	IHFVCVKGALSSTPRFIERSA	evm.model.Chr11.89	GALsSTPR	0.917	0.917	0	0	0	0	0	37649.2	0	70158	0	0	0
evm.model.Chr11.89_Y2400	RGSGVGGERSYHDEDDEDLLE	evm.model.Chr11.89	SyHDEDDEDLLEG	0.95	0	0.95	0	0	0	0	0	41564.6	0	0	0	0
evm.model.Chr11.90_S31	THRKGAAKLRSVDYAERHGYI	evm.model.Chr11.90	LRsVDYAER	0.966	0.966	0.888	0.864	0.576	0	0	38481	35604.3	38481	38258	31590.7	29915.7
evm.model.Chr11.95_S103	WIRNIEEHASSDVEKMVLGNK	evm.model.Chr11.95	NIEEHASsDVEK	0.947	0.947	0.85	0.902	0	0	0	19482.2	13834.4	18440.8	0	0	0
evm.model.Chr12.104_T258	EAEKKEKEKMTPSKSKK****	evm.model.Chr12.104	EKMtPSK	0.967	0.967	0	0.961	0.912	0	0	18439	0	17993.4	0	0	0
evm.model.Chr12.109_S106	CSSPMTPRGDSSSAPSTPRDG	evm.model.Chr12.109	GDsSSAPSTPR	0.97	0.961	0.967	0	0.97	0.439	0	21398.2	0	14571	14430.8	19009.6	0
evm.model.Chr12.109_S108	SPMTPRGDSSSAPSTPRDGSS	evm.model.Chr12.109	GDSSsAPSTPR	0.971	0.966	0.933	0.958	0.954	0.971	0.947	35103.8	35025.3	42960.4	50743.4	57599.6	39572.7
evm.model.Chr12.109_S117	SSAPSTPRDGSSSGSPSPIPD	evm.model.Chr12.109	DGsSSGSPSPIPDDTPVDGEMASK	0.952	0.952	0.247	0.322	0	0	0	42580.8	16542.1	55424.3	0	0	0
evm.model.Chr12.109_S121	STPRDGSSSGSPSPIPDDTPV	evm.model.Chr12.109	DGSSSGsPSPIPDDTPVDGEMASKPR	0.936	0	0	0.936	0	0	0	0	0	15294.2	0	0	0
evm.model.Chr12.109_S238	KLIKEEQSRKSLEEVALRKEM	evm.model.Chr12.109	KsLEEVALR;sLEEVALR	1	1	1	1	0	1	0	14403.5	11601.8	20176.2	0	0	20286.2
evm.model.Chr12.109_S482	SKPKQEAEQQSADEAGNKDEN	evm.model.Chr12.109	QEAEQQsADEAGNKDENPVKANPDVK	1	1	1	1	0	0	0	43330.6	33447.5	116831	0	0	0
evm.model.Chr12.135_S557	GSNIQEPPDPSEAEKRDLENM	evm.model.Chr12.135	GSNIQEPPDPsEAEKR	0.959	0	0	0.959	0	0	0	0	0	115403	0	0	0
evm.model.Chr12.135_S692	PRTSGERRAQSPPPPIIDHRA	evm.model.Chr12.135	AQsPPPPIIDHR;RAQsPPPPIIDHR	1	1	1	1	1	1	1	1.56695e+06	1.5935e+06	1.39709e+06	855782	936561	959005
evm.model.Chr12.141_S1283	LEDMADRRTHSDGESVAGETR	evm.model.Chr12.141	RTHsDGESVAGETR;THsDGESVAGETR;THsDGEsVAGETR	0.968	0.962	0.963	0.955	0.965	0.968	0.959	514400	527657	481534	432710	469219	364363
evm.model.Chr12.141_S1287	ADRRTHSDGESVAGETRLSVY	evm.model.Chr12.141	THsDGEsVAGETR	0.962	0	0.962	0.952	0	0.892	0	26704.9	41972	0	0	27882.1	0
evm.model.Chr12.141_S1304	LSVYSDRGYTSDSELYENHPG	evm.model.Chr12.141	GYTsDSELYENHPGNTDTASEK	0.969	0.966	0.965	0.966	0	0	0.969	887337	588856	1.06788e+06	0	248925	314532
evm.model.Chr12.141_S212	EFKEDSKNLLSNSMKKLKMRA	evm.model.Chr12.141	NLLsNSMK	0.936	0	0.5	0	0.936	0.5	0	26989.3	29733.7	27014	34584	39104	0
evm.model.Chr12.141_S214	KEDSKNLLSNSMKKLKMRAGG	evm.model.Chr12.141	NLLSNsMK;NLLSNsMKK	0.964	0.964	0	0	0.963	0	0	168031	173499	199980	212332	93832.2	204333
evm.model.Chr12.141_S605	IASKNATPPASPSRVSKPDTE	evm.model.Chr12.141	NAtPPAsPSR	0.967	0.947	0.888	0.96	0.967	0.94	0.964	508356	454658	448440	561462	589788	530174
evm.model.Chr12.141_T1683	SLRNEVFKPPTPEVKKEELVA	evm.model.Chr12.141	NEVFKPPtPEVK	1	0	0	1	0	0	0	418835	383290	546372	98798.8	209493	241727
evm.model.Chr12.141_T601	APGVIASKNATPPASPSRVSK	evm.model.Chr12.141	NAtPPASPSR;NAtPPAsPSR	0.973	0.965	0.97	0.968	0.973	0.973	0.972	1.02076e+06	920857	842284	1072969	1.09886e+06	1.03076e+06
evm.model.Chr12.146_S127	ASPVRHESGESPTMEETRRVD	evm.model.Chr12.146	HESGEsPTMEETR	0.963	0.955	0.936	0.963	0.95	0	0	60879.7	61360.6	60773.3	40147.6	53865.5	51235.1
evm.model.Chr12.146_S166	DDYSHHVIEPSPEVERKVWKP	evm.model.Chr12.146	VNNYEDDYSHHVIEPsPEVER	0.965	0.912	0	0.965	0	0	0	6891.6	0	41779.2	0	0	0
evm.model.Chr12.146_S474	FDGVEFEESRSPSPFAPTLTR	evm.model.Chr12.146	sPSPFAPTLTR;sPsPFAPTLTR	0.973	0.97	0.971	0.969	0.973	0.973	0.972	864408	1.01522e+06	1.24357e+06	505778	749089	960784
evm.model.Chr12.146_S476	GVEFEESRSPSPFAPTLTRQK	evm.model.Chr12.146	SPsPFAPTLTR;sPsPFAPTLTR	0.973	0.97	0.971	0.969	0.973	0.972	0.972	886146	1.0307e+06	1305471	558719	943880	838811
evm.model.Chr12.146_S525	PSRRPLARSTSSESVVSLGAE	evm.model.Chr12.146	STsSESVVSLGAEK;STsSESVVsLGAEK	0.968	0.968	0.967	0.763	0.944	0.932	0	1.38868e+06	1.51929e+06	1.4383e+06	1.60764e+06	1.47406e+06	1.59182e+06
evm.model.Chr12.146_S526	SRRPLARSTSSESVVSLGAEK	evm.model.Chr12.146	STSsEsVVSLGAEK	0.931	0	0	0.931	0	0	0	0	0	24454	0	26381.5	0
evm.model.Chr12.146_S528	RPLARSTSSESVVSLGAEKKA	evm.model.Chr12.146	STSsEsVVSLGAEK	0.935	0	0	0.935	0	0	0	0	0	24454	0	26381.5	0
evm.model.Chr12.146_S531	ARSTSSESVVSLGAEKKATPF	evm.model.Chr12.146	STSSESVVsLGAEK;STsSESVVsLGAEK	0.971	0.968	0.968	0.954	0.971	0.971	0.97	175910	208329	196956	222179	228283	256958
evm.model.Chr12.146_S570	SDNKKVVRNESVQSVAPPRAA	evm.model.Chr12.146	NEsVQSVAPPR	0.973	0.97	0.96	0.968	0.973	0.971	0.969	63163.2	85275.1	68286.5	89360.4	63327.1	101574
evm.model.Chr12.146_S63	DEDKVPQTSQSPNKRSRMEGN	evm.model.Chr12.146	VPQTSQsPNKR	0.964	0.956	0	0.964	0.93	0	0	65762	66798.7	60379.8	68579	48412.3	36475.1
evm.model.Chr12.146_S768	PNQEKSKRKLSGILHKSLTPR	evm.model.Chr12.146	KLsGILHK	1	1	1	1	1	1	1	114430	103437	147556	66190.9	59002.9	53633.5
evm.model.Chr12.219_S1168	DTKKGSVVNQSTPDLNDANSG	evm.model.Chr12.219	GSVVNQsTPDLNDANSGAGR	0.955	0	0.955	0	0	0	0	0	17701.3	0	0	0	0
evm.model.Chr12.219_S1433	PTKAVTPEPPSPREVVTSPTT	evm.model.Chr12.219	AVTPEPPsPR	0.972	0.969	0.97	0.969	0.971	0.972	0.968	344208	342886	296366	507384	399074	468427
evm.model.Chr12.219_S1440	EPPSPREVVTSPTTPKVEKSQ	evm.model.Chr12.219	EVVTsPTTPK	0.97	0.884	0.934	0.965	0.97	0.97	0.963	46679.5	45297.2	45012.4	75892.8	65986.9	73134.9
evm.model.Chr12.219_S1526	EIGELTERGDSLNSFEKDRLK	evm.model.Chr12.219	GDsLNSFEK	0.973	0.969	0.97	0.968	0.973	0.971	0.972	96734.5	96690.7	96110.3	85711.8	120315	114534
evm.model.Chr12.219_S210	VPESTFTRTVSNPEAVMKKRR	evm.model.Chr12.219	TVsNPEAVMK	0.973	0.934	0.968	0.954	0.973	0.97	0.971	211760	223243	212009	257540	272761	267471
evm.model.Chr12.219_S348	SKSKSKERKPSLQSSDRQSLT	evm.model.Chr12.219	KPsLQSSDR	0.967	0.946	0.967	0.966	0.868	0.963	0	73459.6	84310.7	78973.2	79006.9	61710.3	69583.9
evm.model.Chr12.219_S529	YPEKHQGVPSSPHKSNQVPTK	evm.model.Chr12.219	HQGVPSsPHK	0.961	0	0.961	0.952	0.933	0	0	149962	154788	158464	104236	103701	82722.3
evm.model.Chr12.219_S585	QQGRPRNKSYSQSESMYSPRQ	evm.model.Chr12.219	SYsQSESMYSPR	0.953	0.953	0	0	0	0	0	23307.3	15857.6	14830.2	0	14821.9	22308.6
evm.model.Chr12.219_T1132	QNFGNQGRHETPPTTPLTPQH	evm.model.Chr12.219	HEtPPTTPLTPQHQDVR	0.969	0.969	0	0.967	0	0	0	69044.6	0	181058	0	0	0
evm.model.Chr12.236_S186	LELAKQITFGSPKNEKKKSEE	evm.model.Chr12.236	QITFGsPK	0.973	0	0.967	0.969	0.973	0.97	0.972	156600	154386	132570	173228	183640	166229
evm.model.Chr12.236_S9	**MERSYNLRSPAVKRLMKEA	evm.model.Chr12.236	SYNLRsPAVK	0.967	0.845	0.964	0.456	0.967	0.839	0.953	24749.8	63255.1	31125.7	47077.1	39513.8	47659.5
evm.model.Chr12.236_T233	MRSTVTAPSTTPPPPRRRQIN	evm.model.Chr12.236	STVTAPSTtPPPPR	0.972	0.965	0.968	0.965	0.971	0.972	0.968	2.13897e+06	2.11627e+06	1.98845e+06	1.92659e+06	1.51817e+06	1.43246e+06
evm.model.Chr12.238_T626	KAAGLEEINRTP*********	evm.model.Chr12.238	AAGLEEINRtP	1	1	1	1	1	1	1	411746	434668	427610	344542	422227	394121
evm.model.Chr12.262_S1033	KTDPNPCGPESECLNRMLMYE	evm.model.Chr12.262	CICKKTDPNPCGPEsECLNR	0.967	0.967	0	0	0	0	0	90599.9	0	0	0	0	0
evm.model.Chr12.262_S1391	KSTPVSTPGGSGAKKRGRPRK	evm.model.Chr12.262	STPVSTPGGsGAK	0.959	0.947	0.948	0	0.941	0.897	0.959	221075	213536	218917	265120	252041	262540
evm.model.Chr12.262_S1487	NESLPKNADVSPLKSAVSTPH	evm.model.Chr12.262	NADVsPLK	1	1	1	1	1	1	1	22433	21156.6	24705.6	57586.8	22660.5	41933.8
evm.model.Chr12.262_S380	KRLQTPKSNKSPADPLRGVKK	evm.model.Chr12.262	SNKsPADPLR	0.958	0.935	0	0	0	0.958	0	118151	99545.2	87494	83047.9	85834.2	88855.1
evm.model.Chr12.262_S488	GKRKGRPPKKSLEPTDVVNPH	evm.model.Chr12.262	KsLEPTDVVNPHR;sLEPTDVVNPHR	0.972	0	0	0.927	0	0.972	0	92140.2	80257.1	120367	46573.4	66712.5	0
evm.model.Chr12.262_S538	GVPLGKGSRKSTESLSPVKQM	evm.model.Chr12.262	KsTESLSPVK;KsTESLsPVK	0.958	0.957	0.958	0	0	0	0	24209.6	17613.9	0	22629.9	0	30335.3
evm.model.Chr12.262_S543	KGSRKSTESLSPVKQMVNELL	evm.model.Chr12.262	KSTESLsPVK;KsTESLsPVK;STESLsPVK	0.969	0.965	0.969	0.942	0.96	0.969	0.964	261894	272481	201180	77483.1	218805	79180.7
evm.model.Chr12.262_S615	DSSSNGSKADSEEAPSFKRTR	evm.model.Chr12.262	ADsEEAPSFK	0.968	0.968	0	0.966	0	0	0.968	17284.5	0	17599.8	0	27680	23950.5
evm.model.Chr12.262_T1387	ISTPKSTPVSTPGGSGAKKRG	evm.model.Chr12.262	STPVStPGGSGAK	0.966	0	0.487	0.858	0	0.966	0.948	0	28325.2	203591	32170.3	37283	28756.7
evm.model.Chr12.262_T68	PVVDLPKSTITPEKNEKQDAN	evm.model.Chr12.262	STItPEKNEK	0.967	0.941	0.907	0.967	0.958	0.932	0.947	101737	139858	89955.6	81559.3	71952.2	72401.3
evm.model.Chr12.277_S104	TIEMNSKKGKSDDDDTDFVQS	evm.model.Chr12.277	GKsDDDDTDFVQSNPVLR	0.953	0	0	0.953	0	0	0	0	0	19751.7	0	0	0
evm.model.Chr12.277_S71	SNDSTVVKKKSDELNPTGVES	evm.model.Chr12.277	sDELNPTGVESSMK	0.971	0.968	0	0.968	0.953	0.969	0.971	57863.4	13831.8	64752.1	31397.2	27920.5	27468.3
evm.model.Chr12.277_S89	VESSMKKLMPSPDASTIEMNS	evm.model.Chr12.277	LMPsPDASTIEMNSK;LMPsPDAsTIEMNSK	0.97	0.968	0.957	0.966	0.883	0	0.97	506972	468486	589452	190541	314437	355551
evm.model.Chr12.277_S93	MKKLMPSPDASTIEMNSKKGK	evm.model.Chr12.277	LMPSPDAsTIEMNSK;LMPsPDAsTIEMNSK	0.959	0.626	0.959	0.955	0	0	0	50992	43336.1	65212.2	0	0	0
evm.model.Chr12.292_S1631	RHLRHSSSSQSPGKSPSVGMP	evm.model.Chr12.292	HSSSSQsPGKsPSVGMPK	0.919	0	0.919	0.768	0	0	0	0	69021.7	68086.5	0	0	0
evm.model.Chr12.292_S1635	HSSSSQSPGKSPSVGMPKGIL	evm.model.Chr12.292	HSSSSQsPGKsPSVGMPK	0.923	0	0.923	0.574	0	0	0	0	69021.7	68086.5	0	0	0
evm.model.Chr12.292_S475	LKTCVRDDVESLEDASVWRLL	evm.model.Chr12.292	DDVEsLEDASVWR	0.968	0.954	0	0.968	0	0	0	12408.9	0	55569.5	0	0	0
evm.model.Chr12.300.2_S30	PIILKLLSQQSVTRQEWQDLF	evm.model.Chr12.300.2	LLSQQsVTR	0.96	0.953	0.952	0.776	0.96	0.608	0.949	18769.2	0	14774.1	27193.6	19553.7	23827.8
evm.model.Chr12.313_S450	IRNISRIANASIKIVPPEDGD	evm.model.Chr12.313	IANAsIK	1	1	0	1	0	0	0	64138.2	0	79554.3	0	0	101268
evm.model.Chr12.313_S472	EKQRRVTIMGSPEGQWKSQFC	evm.model.Chr12.313	VTIMGsPEGQWK	0.973	0.968	0.969	0.968	0.973	0.971	0.973	3459126	3.12685e+06	4.20828e+06	1.39498e+06	2393801	2.75932e+06
evm.model.Chr12.313_S530	NNVRELQRLTSSEVVIPRQSE	evm.model.Chr12.313	LTsSEVVIPR	0.959	0.522	0.921	0.906	0.942	0.829	0.959	342298	341482	309085	293130	382089	437205
evm.model.Chr12.313_S531	NVRELQRLTSSEVVIPRQSET	evm.model.Chr12.313	LTSsEVVIPR	0.96	0.912	0.96	0.944	0	0	0.946	14054.1	19931.6	16462.9	0	0	0
evm.model.Chr12.313_S539	TSSEVVIPRQSETEGMEEVPV	evm.model.Chr12.313	QsETEGMEEVPVK	0.96	0.96	0	0	0	0	0	47296.8	51723.3	47875.5	0	0	56543
evm.model.Chr12.313_S68	NGFSYGGKEMSVEHSVPRGSR	evm.model.Chr12.313	EMsVEHSVPR	0.972	0.969	0.947	0.967	0.972	0	0.971	84396.2	101091	96388.5	106852	91963.3	96819.4
evm.model.Chr12.316_S1065	DENENEKADLSSAELPTGFGG	evm.model.Chr12.316	ADLsSAELPTGFGGAR	0.963	0.963	0.945	0.495	0	0	0	38312.6	23961.8	77465.2	0	0	0
evm.model.Chr12.316_S1210	NYGSNQVKLNSPQAEEQTDYA	evm.model.Chr12.316	LNsPQAEEQTDYAVTSPGDQR;LNsPQAEEQTDYAVTsPGDQR	0.968	0.967	0.968	0.964	0	0	0	1224639	1.2239e+06	1.58751e+06	287334	338646	313323
evm.model.Chr12.316_S1223	AEEQTDYAVTSPGDQREADNS	evm.model.Chr12.316	LNSPQAEEQTDYAVTsPGDQR;LNsPQAEEQTDYAVTsPGDQR	0.966	0.966	0.966	0.964	0	0	0	813943	1.16108e+06	1.51383e+06	246701	246252	301962
evm.model.Chr12.316_S1233	SPGDQREADNSENPESNHPAN	evm.model.Chr12.316	EADNsENPESNHPANDDEES	0.942	0.942	0	0	0	0	0	14977.9	13196.4	10984.4	0	0	0
evm.model.Chr12.316_S1248	SNHPANDDEES**********	evm.model.Chr12.316	EADNSENPESNHPANDDEEs	0.964	0.963	0.961	0.964	0	0	0	17900	20916.2	20391.4	0	9700.86	0
evm.model.Chr12.316_S266	FNREVLDFDYSDDEKTPPATV	evm.model.Chr12.316	EVLDFDYsDDEK	0.968	0.968	0.963	0.965	0.957	0.956	0.92	314766	236141	708212	107185	57240.4	64589.4
evm.model.Chr12.316_S808	EPRVDTSKPPSDRGPSPSEEP	evm.model.Chr12.316	VDTSKPPsDR;VDTSKPPsDRGPsPSEEPR	0.973	0.968	0.965	0.963	0.973	0.972	0.954	1.46126e+06	1.63631e+06	1.55708e+06	944134	1.11079e+06	872708
evm.model.Chr12.316_S813	TSKPPSDRGPSPSEEPRDIGP	evm.model.Chr12.316	GPsPSEEPR;VDTSKPPSDRGPsPSEEPR;VDTSKPPsDRGPsPSEEPR	0.973	0.97	0.971	0.969	0.973	0.973	0.973	1.51677e+06	1.67349e+06	1.57076e+06	1.00541e+06	1.12781e+06	913096
evm.model.Chr12.316_S984	GWGSRPDFRRSPSIDPEEEEY	evm.model.Chr12.316	RsPSIDPEEEEYNR;RsPsIDPEEEEYNR;sPSIDPEEEEYNR;sPsIDPEEEEYNR	0.973	0.968	0.969	0.97	0.887	0.973	0.961	3.54932e+06	3.46414e+06	3.90351e+06	1.30051e+06	2264917	2463365
evm.model.Chr12.316_S986	GSRPDFRRSPSIDPEEEEYNR	evm.model.Chr12.316	RsPsIDPEEEEYNR;SPsIDPEEEEYNR;sPsIDPEEEEYNR	0.973	0.966	0.954	0.97	0.887	0.973	0.95	1.24988e+06	1.25896e+06	2.3242e+06	990026	1.60276e+06	1.75069e+06
evm.model.Chr12.316_Y1219	NSPQAEEQTDYAVTSPGDQRE	evm.model.Chr12.316	LNSPQAEEQTDyAVTSPGDQR	0.828	0.828	0	0	0	0.521	0	398626	0	0	0	73370.9	66612.8
evm.model.Chr12.324_S20	VSLDPGARPKSKEILDEKDKV	evm.model.Chr12.324	sKEILDEK;sKEILDEKDK	1	1	0	1	0	1	1	16396.1	0	0	0	79537.5	70498.7
evm.model.Chr12.329_S144	RRVRHVEDRGSLPRNNHNGST	evm.model.Chr12.329	HVEDRGsLPR	1	1	1	1	0	1	0	263881	263127	257197	93023	112362	118952
evm.model.Chr12.329_S159	NHNGSTPRHPSDRTDPDSYDS	evm.model.Chr12.329	HPsDRtDPDSYDSIK	0.97	0	0.841	0.962	0.97	0.967	0	127300	125748	127579	56395.1	87227.1	92507.6
evm.model.Chr12.329_S166	RHPSDRTDPDSYDSIKRTHPG	evm.model.Chr12.329	TDPDsYDSIKR	0.954	0.954	0	0	0	0	0	23658.9	0	0	0	14898.8	0
evm.model.Chr12.329_S169	SDRTDPDSYDSIKRTHPGKMH	evm.model.Chr12.329	TDPDSYDsIKR	0.972	0.961	0.951	0.954	0.972	0.947	0.953	361176	319842	308749	265602	278729	282615
evm.model.Chr12.329_S203	NRSSASSLAASDERGARVGGK	evm.model.Chr12.329	SSASSLAAsDER	0.905	0	0	0	0.905	0	0	0	0	0	31295.1	0	28152.9
evm.model.Chr12.329_S227	YEYPPRKNFGSNDEVRKLAPE	evm.model.Chr12.329	KNFGsNDEVR;KNFGsNDEVRK;NFGsNDEVR;NFGsNDEVRK	1	1	1	1	1	1	1	2.23493e+06	2013762	1.96284e+06	2640256	2207143	2.56292e+06
evm.model.Chr12.329_S252	EEYGLENDRRSTDDENDDYRG	evm.model.Chr12.329	FQPEEYGLENDRRstDDENDDYR;sTDDENDDYR	0.958	0.495	0.947	0.782	0.946	0.958	0.495	24579.9	28695.4	279233	49848.7	62326.6	43384.7
evm.model.Chr12.329_S301	DEDIPVAAPRSSVAKPTIGRA	evm.model.Chr12.329	sSVAKPTIGR	0.953	0.495	0.495	0.495	0.495	0.495	0.953	208851	187103	183024	256744	269941	246514
evm.model.Chr12.329_S832	HQATTDRATNSPSAPSTGGRR	evm.model.Chr12.329	ATNsPSAPSTGGR;ATNsPSAPsTGGR	0.971	0.967	0.968	0.964	0.971	0.971	0.927	804660	779219	775410	860799	857245	794788
evm.model.Chr12.329_S837	DRATNSPSAPSTGGRRAQRNA	evm.model.Chr12.329	ATNsPSAPsTGGR	0.958	0.958	0	0	0	0	0	22345.4	21900.5	0	0	32551.6	0
evm.model.Chr12.329_S848	TGGRRAQRNASQSQEEVPMTT	evm.model.Chr12.329	NAsQSQEEVPMTTPGVTLTDTNR;NAsQSQEEVPMTTPGVTLTDTNRR	0.967	0.967	0.959	0.965	0	0	0	278553	150200	573007	0	0	0
evm.model.Chr12.329_S850	GRRAQRNASQSQEEVPMTTPG	evm.model.Chr12.329	NASQsQEEVPMTTPGVTLTDTNR	0.947	0	0	0.947	0	0	0	0	0	9719.35	0	0	0
evm.model.Chr12.329_S875	DTNRRKAPADSWV********	evm.model.Chr12.329	KAPADsWV	1	0	0	1	0	0	0	0	0	17268.4	0	0	0
evm.model.Chr12.329_T162	GSTPRHPSDRTDPDSYDSIKR	evm.model.Chr12.329	HPsDRtDPDSYDSIK	0.97	0	0.84	0.962	0.97	0.968	0	127300	125748	127579	56395.1	87227.1	92507.6
evm.model.Chr12.329_T253	EYGLENDRRSTDDENDDYRGL	evm.model.Chr12.329	FQPEEYGLENDRRstDDENDDYR	0.782	0	0	0.782	0	0	0	0	0	254934	0	0	0
evm.model.Chr12.329_T816	GHFTPTMPVNTLPRTSHQATT	evm.model.Chr12.329	GHFTPTMPVNtLPR	0.967	0.959	0.954	0.967	0	0	0	145486	42831.1	256693	0	33676.5	0
evm.model.Chr12.358_S1046	PKHITLKEPLSPHKVQPKPCI	evm.model.Chr12.358	EPLsPHK	1	1	1	1	1	1	1	846514	1.34576e+06	899615	1.3327e+06	1.26955e+06	766903
evm.model.Chr12.362_S279	RLGLTKRLRKSMLSQWNTLAE	evm.model.Chr12.362	sMLSQWNTLAEK	0.967	0	0.967	0.964	0	0	0	0	10940.6	11824	0	0	0
evm.model.Chr12.362_S562	ELYIQRGNRLSPREQIYITDE	evm.model.Chr12.362	GNRLsPR	1	0	1	0	0	1	1	760161	739382	757421	692048	748482	522720
evm.model.Chr12.362_S595	MEILPLALANSH*********	evm.model.Chr12.362	MEILPLALANsH	1	0	0	1	0	0	0	0	0	11837.4	0	0	0
evm.model.Chr12.363_S227	CENNRYGMGTSVERSSASTNY	evm.model.Chr12.363	YGMGTsVER	0.956	0	0.956	0	0	0	0	36243.1	43274.4	37072.6	64145.4	65027.7	61538.8
evm.model.Chr12.363_S287	ELVTYRYHGHSMSDPGTSYRT	evm.model.Chr12.363	YHGHsMSDPGTSYR;YHGHsMSDPGTsYR	0.966	0.962	0.966	0.963	0.759	0	0	4.29348e+06	3907008	5506299	767247	1526394	1.52277e+06
evm.model.Chr12.363_S289	VTYRYHGHSMSDPGTSYRTRD	evm.model.Chr12.363	YHGHSMsDPGTSYR	0.921	0	0	0.921	0	0	0	0	0	1.13583e+06	0	0	0
evm.model.Chr12.363_S294	HGHSMSDPGTSYRTRDEVKDV	evm.model.Chr12.363	YHGHsMSDPGTsYR	0.962	0	0	0.962	0.584	0	0	227855	484330	738245	37317.9	124056	0
evm.model.Chr12.363_T293	YHGHSMSDPGTSYRTRDEVKD	evm.model.Chr12.363	YHGHSMSDPGtSYR	0.761	0.761	0.593	0	0.457	0	0	156320	147635	147643	60827.5	82453.6	85489.2
evm.model.Chr12.364_S60	VDLTKRAGELSDDEIDRIITI	evm.model.Chr12.364	AGELsDDEIDR	1	1	1	0	1	1	1	296150	274158	257509	292172	278763	305850
evm.model.Chr12.365_S116	FDEQKKCRINSDLTGPIKIGK	evm.model.Chr12.365	INsDLTGPIK	0.962	0	0.962	0.953	0	0	0	0	14189.4	14573.7	0	0	0
evm.model.Chr12.365_S213	SPVKHLARQSSEDFDENEVKD	evm.model.Chr12.365	QSsEDFDENEVK	0.933	0	0.915	0.933	0	0	0	61333.9	37625.9	17895.3	0	62428.6	0
evm.model.Chr12.368_S35	DAATNVDSSESPSTSMKKKKK	evm.model.Chr12.368	DAATNVDSSEsPSTSMK	0.972	0.967	0.967	0.959	0.972	0.969	0.969	347290	356669	297845	315302	364687	349524
evm.model.Chr12.403_S1209	KLDKERSAVVSEDETSGDSMN	evm.model.Chr12.403	SAVVsEDETSGDSMNNDAR;SAVVsEDETsGDSMNNDAR	0.968	0.968	0.968	0.966	0.967	0.967	0.959	236908	195918	170516	153798	136225	149961
evm.model.Chr12.403_S1214	RSAVVSEDETSGDSMNNDARD	evm.model.Chr12.403	SAVVSEDETsGDSMNNDAR;SAVVSEDETsGDsMNNDAR;SAVVsEDETsGDSMNNDAR	0.964	0.947	0.964	0.954	0	0	0	30416.3	72045.4	114746	0	0	24147.4
evm.model.Chr12.403_S1217	VVSEDETSGDSMNNDARDETF	evm.model.Chr12.403	SAVVSEDETsGDsMNNDAR	0.964	0	0.964	0.95	0	0	0	0	49042.2	45895.7	0	0	0
evm.model.Chr12.403_S1400	VEGVKVGPMLSPTSLKNPRIR	evm.model.Chr12.403	VGPMLsPTSLK	0.973	0.97	0.97	0.962	0.973	0.972	0.969	5556098	5348625	3.828e+06	3710409	4543230	5583802
evm.model.Chr12.403_S1565	RPHKDMWKRMSEDNTVFQNNN	evm.model.Chr12.403	MsEDNTVFQNNNQLR	0.93	0	0.93	0	0	0	0	7468.74	33134.9	16204.7	0	0	0
evm.model.Chr12.403_S2926	VEQETNEDPASPKDSVDAMAT	evm.model.Chr12.403	ADVEQETNEDPAsPK;ADVEQETNEDPAsPKDSVDAMATK	0.973	0.958	0.942	0.968	0.973	0.955	0.972	220456	193514	289563	176199	180190	174452
evm.model.Chr12.403_S2930	TNEDPASPKDSVDAMATKEKY	evm.model.Chr12.403	ADVEQETNEDPASPKDsVDAMATK	0.944	0	0.944	0	0	0	0	57902.9	35596.3	0	0	0	0
evm.model.Chr12.403_S2944	MATKEKYVDDSIEDDAPKEEA	evm.model.Chr12.403	YVDDsIEDDAPK	0.968	0	0.968	0.961	0	0.965	0	24080.8	19867.5	16626.7	0	13770.9	0
evm.model.Chr12.403_S3010	KEDVGKEEAMSPSDKEVADLS	evm.model.Chr12.403	EDVGKEEAMsPSDK;EDVGKEEAMsPSDKEVADLSIK;EEAMsPSDKEVADLSIK;KEDVGKEEAMsPSDK	0.97	0.968	0.966	0.962	0.97	0.961	0.968	497442	432340	431501	274488	339879	247972
evm.model.Chr12.403_S3346	PRSNSSYRHLSASPSQSRSKE	evm.model.Chr12.403	HLsASPSQSR;HLsAsPSQSR	0.968	0.914	0.968	0.915	0.896	0.963	0.958	37253.4	39221.2	36867.7	420456	55047.1	44666.5
evm.model.Chr12.403_S3348	SNSSYRHLSASPSQSRSKETS	evm.model.Chr12.403	HLSAsPSQSR;HLsAsPSQSR	0.968	0.958	0.968	0.95	0.944	0.963	0.957	376507	394669	383340	438724	450380	362505
evm.model.Chr12.403_S3546	SKKSRKSKFVSPAMLPLDTRI	evm.model.Chr12.403	FVsPAMLPLDTR	0.97	0.97	0	0.969	0	0	0	21025.4	0	64775.6	0	0	0
evm.model.Chr12.403_S3621	DTTLEMSGQESDPMISPKPSA	evm.model.Chr12.403	IDPSDTTLEMSGQEsDPMISPK	0.947	0	0	0.947	0	0	0	0	0	17364.6	0	0	0
evm.model.Chr12.403_S3798	PSRSSTPSRGSPSQRHNRPRS	evm.model.Chr12.403	SSTPSRGsPSQR	0.753	0.753	0	0	0	0	0	8983.27	15326.4	14085.3	0	0	0
evm.model.Chr12.403_S387	AMSPRQGSPLSPMRNPIRQGS	evm.model.Chr12.403	QGSPLsPMR	0.971	0	0.904	0.935	0.971	0	0	68384.5	68459.9	57290	38243.9	17082.6	41074.1
evm.model.Chr12.403_S3891	DLHTRLLPSQSPTSKSSSSSH	evm.model.Chr12.403	LLPSQsPTSK	0.972	0.96	0.963	0.82	0.972	0.953	0.964	504465	458915	412236	566070	551974	613187
evm.model.Chr12.403_S441	SPLSARLPNYSPKQTMNQQYP	evm.model.Chr12.403	LPNYsPK	0.96	0.956	0	0.936	0	0.96	0.942	110211	133605	123899	216899	123261	140116
evm.model.Chr12.403_T1142	SPGKMGEDPMTPGGKKKRPRK	evm.model.Chr12.403	MGEDPMtPGGK	1	0	0	0	1	1	1	93812.9	108725	96320.9	121166	145259	111149
evm.model.Chr12.403_T3068	EDPEKQRRAATPVQMSLRSKS	evm.model.Chr12.403	AAtPVQMSLR;RAAtPVQMSLR	0.974	0.97	0.971	0.968	0.974	0.973	0.972	2.43736e+06	2.46256e+06	2210699	2.53782e+06	2.65597e+06	2.76101e+06
evm.model.Chr12.403_T3155	GQIGSFLRPGTPSSHPSTPLS	evm.model.Chr12.403	PGtPSSHPSTPLSDGR	0.969	0.948	0.958	0.966	0.949	0.969	0.487	41684.5	47798.1	40373.9	33572.2	39000.4	48482.9
evm.model.Chr12.403_T783	SGDVEQALAQTPEKEATSNLA	evm.model.Chr12.403	TANSVASSENSGDVEQALAQtPEK	0.969	0.969	0.968	0.968	0	0	0	220948	160680	341793	23117.7	35470	41856.5
evm.model.Chr12.409_S91	NGSICLDILRSQWSPALTVSK	evm.model.Chr12.409	sQWSPALTVSK	0.968	0.968	0	0.967	0	0	0	10055	12996.2	20419.3	0	0	0
evm.model.Chr12.409_S94	ICLDILRSQWSPALTVSKVLL	evm.model.Chr12.409	SQWsPALTVSK	0.966	0.966	0.96	0.965	0	0	0	16111	15779.8	20669.1	0	0	0
evm.model.Chr12.413_T130	KTVANMIKGKTPDEIRKTFNI	evm.model.Chr12.413	GKtPDEIR;GKtPDEIRK	1	1	1	1	1	1	1	59931.6	56889.5	53472.3	74955.9	78628.4	54752.1
evm.model.Chr12.440_S98	KVTQQDIKKASPVLFKFRAKF	evm.model.Chr12.440	KAsPVLFK	1	1	0	1	0	0	1	20317	0	17629.8	0	0	15606.4
evm.model.Chr12.448.1_S19	RREKDAGTPLSPSITSRKDER	evm.model.Chr12.448.1	DAGTPLsPSITSR;DAGtPLsPSITSR;EKDAGTPLsPSITSR	0.97	0.968	0.966	0.962	0.97	0.964	0.958	1.20883e+06	1204897	1207630	951092	1.0507e+06	1.10114e+06
evm.model.Chr12.448.1_S21	EKDAGTPLSPSITSRKDERDQ	evm.model.Chr12.448.1	DAGTPLSPsITSR	0.964	0	0	0	0.331	0.964	0.33	50962.5	60560.3	0	31716.4	57849	50540
evm.model.Chr12.448.1_S222	VSEVRKRHTLSVTEIDEKVKG	evm.model.Chr12.448.1	HTLsVTEIDEK	0.967	0.965	0.964	0.96	0	0.661	0.967	211097	185367	212447	116970	147014	191792
evm.model.Chr12.448.1_S24	AGTPLSPSITSRKDERDQLAN	evm.model.Chr12.448.1	DAGTPLSPSITsR	0.947	0.947	0.814	0	0	0	0	51783.1	57039.1	0	0	57396.6	0
evm.model.Chr12.448.1_S305	KVDRLQANIQSLQNKAIEEGL	evm.model.Chr12.448.1	LQANIQsLQNK	1	1	1	0	1	0	1	24707.3	22478.7	24944.2	14494.5	0	19904.7
evm.model.Chr12.448.1_S405	LEEEESRLNLSPSPHVDGSDS	evm.model.Chr12.448.1	LNLsPSPHVDGSDSK;LNLsPSPHVDGSDSKR;LNLsPSPHVDGSDsK;LNLsPSPHVDGSDsKR;LNLsPSPHVDGSDsKRR;LNLsPSPHVDGsDSK;LNLsPsPHVDGSDSK;LNLsPsPHVDGSDSKR;LNLsPsPHVDGSDsK;LNLsPsPHVDGSDsKRR;LNLsPsPHVDGsDSK;LNLsPsPHVDGsDSKR	0.972	0.963	0.97	0.967	0.786	0.972	0.972	9588390	9350356	10300000	5.36154e+06	8644182	10000000
evm.model.Chr12.448.1_S407	EEESRLNLSPSPHVDGSDSKR	evm.model.Chr12.448.1	LNLSPsPHVDGSDSK;LNLSPsPHVDGSDSKR;LNLSPsPHVDGSDsK;LNLSPsPHVDGsDSK;LNLsPsPHVDGSDSK;LNLsPsPHVDGSDSKR;LNLsPsPHVDGSDsK;LNLsPsPHVDGSDsKRR;LNLsPsPHVDGsDSK;LNLsPsPHVDGsDSKR	0.972	0.965	0.97	0.967	0.971	0.96	0.972	9365506	10200000	8.38241e+06	5781503	9580631	9674392
evm.model.Chr12.448.1_S413	NLSPSPHVDGSDSKRRSRRKR	evm.model.Chr12.448.1	LNLSPSPHVDGsDSK;LNLSPSPHVDGsDSKR;LNLSPsPHVDGsDSK;LNLsPSPHVDGsDSK;LNLsPsPHVDGsDSK;LNLsPsPHVDGsDSKR	0.986	0.962	0.986	0.948	0.938	0.944	0.732	538631	684859	220047	277510	475097	949455
evm.model.Chr12.448.1_S415	SPSPHVDGSDSKRRSRRKRKR	evm.model.Chr12.448.1	LNLSPSPHVDGSDsK;LNLSPSPHVDGSDsKR;LNLSPSPHVDGSDsKRR;LNLSPsPHVDGSDsK;LNLsPSPHVDGSDsK;LNLsPSPHVDGSDsKR;LNLsPSPHVDGSDsKRR;LNLsPsPHVDGSDsK;LNLsPsPHVDGSDsKRR	0.967	0.965	0.967	0.965	0.793	0.961	0.96	1.3191e+06	7264225	1384751	3.79306e+06	4205657	6721403
evm.model.Chr12.448.1_S429	SRRKRKRVTTSELAQKSKKQE	evm.model.Chr12.448.1	RVTTsELAQK;VTTsELAQK	0.97	0.968	0.965	0.961	0.953	0.965	0.97	921995	871018	834518	895507	847737	888560
evm.model.Chr12.448.1_T16	QQQRREKDAGTPLSPSITSRK	evm.model.Chr12.448.1	DAGtPLSPSITSR;DAGtPLsPSITSR;EKDAGtPLSPSITSR	0.973	0.968	0.968	0.961	0.97	0.973	0.971	149769	160522	122180	185574	184535	156751
evm.model.Chr12.448.1_T428	RSRRKRKRVTTSELAQKSKKQ	evm.model.Chr12.448.1	RVTtSELAQK;VTtSELAQK	0.972	0.967	0.948	0.955	0.972	0.934	0.958	451974	419076	404958	504315	504833	500046
evm.model.Chr12.457_S172	KTEDLQAGAASFKVTSTRLQR	evm.model.Chr12.457	TEDLQAGAAsFK	0.97	0.956	0.97	0.96	0	0	0	76823.4	84378.8	74507.5	0	97133.9	108229
evm.model.Chr12.468_S117	AKIVSSKTYKSPLMTRAKKAL	evm.model.Chr12.468	TYKsPLMTR	0.968	0.745	0.968	0	0	0.966	0	21361.8	0	0	0	0	0
evm.model.Chr12.476_S115	FNVMGGKEQNSPIYISRIIPG	evm.model.Chr12.476	EQNsPIYISR	0.969	0	0.969	0.967	0	0	0	0	5330.39	39375.8	0	36252.7	0
evm.model.Chr12.483_S1079	CSINVFYRNPSLSDADDPVKL	evm.model.Chr12.483	NPsLSDADDPVK	0.969	0.96	0.969	0.965	0	0.966	0.943	22285.5	20820.9	19075.4	28655.4	61335	26744.3
evm.model.Chr12.483_S240	DNVDDPDDGSSPTPKSLNSDI	evm.model.Chr12.483	EHDFEDNVDDPDDGSsPTPK	0.942	0	0.942	0	0	0	0	49337.8	45142.9	0	0	0	0
evm.model.Chr12.492.1_S289	QIGRERSKDDSPVKREEPDEG	evm.model.Chr12.492.1	DDsPVKR;SKDDsPVKR	1	0.88	0.843	0.919	0.813	1	0.956	42745.7	41447.8	35583.4	31166	62011	31187.2
evm.model.Chr12.492.1_T62	RGRFIKIAEVTPGGHKNRLTL	evm.model.Chr12.492.1	IAEVtPGGHK	1	1	1	1	0	0	0	0	24826	25246.7	0	0	0
evm.model.Chr12.548_evm.model.Chr12.549_S441	SPSSSRRRTKSVDDSLKENFA	evm.model.Chr12.548_evm.model.Chr12.549	TKsVDDSLK	0.959	0.933	0.959	0.94	0.939	0.901	0.662	146887	166931	143093	176153	175635	174209
evm.model.Chr12.548_evm.model.Chr12.549_S501	NTVGRRKQHRSRTPPVSTMSP	evm.model.Chr12.548_evm.model.Chr12.549	sRTPPVSTMSPPQWK	0.935	0.935	0.333	0.489	0.491	0.491	0	321089	307304	363881	71107.3	216888	0
evm.model.Chr12.548_evm.model.Chr12.549_S510	RSRTPPVSTMSPPQWKNDDYR	evm.model.Chr12.548_evm.model.Chr12.549	TPPVSTMsPPQWK	0.96	0.96	0.917	0	0	0.93	0.955	167396	143398	214244	0	60079.9	96426.4
evm.model.Chr12.548_evm.model.Chr12.549_S538	ANYESQSNPLSPERNVAGRCP	evm.model.Chr12.548_evm.model.Chr12.549	SLNMEMANYESQSNPLsPER	0.964	0	0	0.964	0	0	0	0	0	86997.8	0	0	0
evm.model.Chr12.548_evm.model.Chr12.549_S566	NRLTQRQRCKSVDDSLHTAHF	evm.model.Chr12.548_evm.model.Chr12.549	sVDDSLHTAHFEPMTPSK;sVDDSLHTAHFEPMtPSK	0.968	0	0	0.968	0	0	0	200165	195155	458418	0	0	0
evm.model.Chr12.548_evm.model.Chr12.549_S592	SKQKKSRMFGSFERGLDKMKM	evm.model.Chr12.548_evm.model.Chr12.549	MFGsFER	1	1	1	1	1	0	0	190081	208392	269267	210486	258819	212954
evm.model.Chr12.548_evm.model.Chr12.549_S613	ILTPGRKRLGSDSGPRKIKAS	evm.model.Chr12.548_evm.model.Chr12.549	LGsDSGPR	0.972	0	0.968	0.965	0.687	0.972	0	0	0	21621.2	0	0	0
evm.model.Chr12.548_evm.model.Chr12.549_T503	VGRRKQHRSRTPPVSTMSPPQ	evm.model.Chr12.548_evm.model.Chr12.549	SRtPPVSTMSPPQWK;tPPVSTMSPPQWK	0.96	0.952	0.943	0	0	0.793	0.96	458946	445543	574364	117034	258754	203347
evm.model.Chr12.548_evm.model.Chr12.549_T580	SLHTAHFEPMTPSKQKKSRMF	evm.model.Chr12.548_evm.model.Chr12.549	sVDDSLHTAHFEPMtPSK	0.95	0	0	0.95	0	0	0	0	0	16449.9	0	0	0
evm.model.Chr12.550.1_S93	NAEPKTEEEGSLINATEDNDL	evm.model.Chr12.550.1	TEEEGsLINATEDNDLK	0.963	0.963	0.962	0.925	0	0	0	108724	71467.9	194468	0	0	0
evm.model.Chr12.550.1_T196	KLFVGGINPDTDNEKVKEHFS	evm.model.Chr12.550.1	LFVGGINPDtDNEK	1	1	1	1	0	1	1	30640.7	24795	28256.8	0	22069.9	28690.7
evm.model.Chr12.563_T14	LGIITKPVIATPDSSRPGTVQ	evm.model.Chr12.563	PVIAtPDSSR	0.937	0	0	0	0.937	0	0	0	0	31927.6	58279.8	55762.9	76297.8
evm.model.Chr12.600_S1802	AAGVRSPKRKSPSKPYSPTKR	evm.model.Chr12.600	sPSKPYSPTK	0.935	0	0	0.935	0	0	0	0	0	23374.8	0	0	22698
evm.model.Chr12.600_S1808	PKRKSPSKPYSPTKRPSRGSS	evm.model.Chr12.600	KSPSKPYsPTK;SPSKPYsPTK	0.957	0.953	0.957	0	0	0.487	0	108243	114136	124211	86504.7	90350.3	0
evm.model.Chr12.600_S1821	KRPSRGSSEVSPGRKSRGSSS	evm.model.Chr12.600	GSSEVsPGR	0.972	0	0.964	0	0.972	0.927	0.971	0	0	0	22751.6	30667.9	0
evm.model.Chr12.600_S1893	SPRKSGSGVGSPHQRSPRRSK	evm.model.Chr12.600	SGSGVGsPHQR	0.965	0.889	0	0	0.951	0.923	0.965	22057.7	0	25147.5	34934.2	0	0
evm.model.Chr12.600_S1960	VKYGGDEIPYSPYRIRAVPSG	evm.model.Chr12.600	YGGDEIPYsPYR	0.946	0	0	0.946	0	0	0	0	0	38849.6	0	0	0
evm.model.Chr12.600_S2503	FSQSYSRVEQSSFRSTGVSSQ	evm.model.Chr12.600	VEQsSFR	0.929	0	0.5	0	0	0.929	0	0	0	0	0	17018.9	0
evm.model.Chr12.600_S2793	HIKHMGLRKYSVTYTAKECGE	evm.model.Chr12.600	KYsVTYTAK	0.961	0.959	0.746	0.961	0	0	0	33469.4	26494.9	31561	0	0	39751.7
evm.model.Chr12.600_T1696	DGTHTVSYTPTKEGPYQVQVK	evm.model.Chr12.600	DNGDGTHTVSYTPtK	0.93	0.93	0	0	0	0	0	16530.8	26034.4	0	0	0	0
evm.model.Chr12.600_Y2792	VHIKHMGLRKYSVTYTAKECG	evm.model.Chr12.600	KySVTYTAK	0.963	0	0	0	0	0.963	0	0	0	0	0	36884.6	0
evm.model.Chr12.60_S304	GTISRSSSTKSLNRSDPGTNS	evm.model.Chr12.60	sLNRsDPGTNSTNSPVLIK	0.929	0.929	0	0	0	0	0	42139.9	0	51352.6	0	0	0
evm.model.Chr12.60_S308	RSSSTKSLNRSDPGTNSTNSP	evm.model.Chr12.60	sDPGTNSTNSPVLIK;sDPGTNSTNsPVLIK;sLNRsDPGTNSTNSPVLIK	0.966	0.966	0	0	0	0	0	491740	356825	486258	294412	0	335825
evm.model.Chr12.60_S317	RSDPGTNSTNSPVLIKTTTDP	evm.model.Chr12.60	SDPGTNSTNsPVLIK;SDPGTNStNsPVLIK;sDPGTNSTNsPVLIK	0.966	0.966	0	0	0	0	0	381932	0	231172	0	0	0
evm.model.Chr12.60_T315	LNRSDPGTNSTNSPVLIKTTT	evm.model.Chr12.60	SDPGTNStNsPVLIK	0.944	0.944	0	0	0	0	0	160581	0	0	0	0	0
evm.model.Chr12.618_S155	RALFDFKSDDSDDLPFSKHEI	evm.model.Chr12.618	SDDsDDLPFSK	0.958	0	0.935	0.958	0	0	0	0	21148.3	12727.6	0	0	0
evm.model.Chr12.618_Y208	TAIRNSTPGTYQLPGPQLQLN	evm.model.Chr12.618	NSTPGTyQLPGPQLQLNQAR	0.941	0	0	0.941	0	0	0	0	0	92430.3	0	0	0
evm.model.Chr12.623_S276	RLQHIEPRPPSPGRFGRDRSM	evm.model.Chr12.623	LQHIEPRPPsPGR	1	1	1	1	0	0	0	261835	241914	330644	0	0	0
evm.model.Chr12.623_S285	PSPGRFGRDRSMEQNFPEREQ	evm.model.Chr12.623	DRsMEQNFPER	1	1	0	1	0	0	0	39863.5	43272.1	32780.8	30412.5	32052.5	0
evm.model.Chr12.627_T165	QCTKNVLPDVTDEEQKGDAEG	evm.model.Chr12.627	NVLPDVtDEEQKGDAEGK	1	0	0	1	0	0	0	48772.3	0	102614	0	0	0
evm.model.Chr12.645_S379	NKYSTSAPHGSP*********	evm.model.Chr12.645	YSTSAPHGsP	0.966	0.943	0	0.897	0.966	0.952	0.965	409395	406718	381550	422456	476093	419652
evm.model.Chr12.645_S44	IKEMAVKQISSDSETPTESGQ	evm.model.Chr12.645	QISsDSETPTESGQYR	0.949	0.949	0	0	0	0	0	13042.7	0	0	0	0	0
evm.model.Chr12.681_S370	DDELMAERDDSFEEGGYPAAR	evm.model.Chr12.681	DDsFEEGGYPAAR	0.974	0.97	0.97	0.968	0.974	0.973	0.973	1.22828e+06	1254792	1.14301e+06	902340	997146	1.0036e+06
evm.model.Chr12.681_S405	ARVFSVLRKESETVLELKGLT	evm.model.Chr12.681	KEsETVLELK	0.961	0.949	0.95	0.961	0	0	0	28613.5	27568.8	26121.9	0	0	30892.6
evm.model.Chr12.681_S5	******MSANSNSNETQSTKT	evm.model.Chr12.681	SANsNSNETQSTK	0.953	0.953	0.485	0	0	0.906	0	18284.7	10214.2	0	0	18372.9	15648.1
evm.model.Chr12.699_T96	KNITNNMSSVTKNMEATMRSM	evm.model.Chr12.699	NITNNMSSVtK	0.961	0	0	0	0	0	0.961	0	0	18090.6	0	0	36597.1
evm.model.Chr12.700_S82	ARELKMNKSSSPVVLSNSGRL	evm.model.Chr12.700	SSsPVVLSNSGR	0.965	0.956	0	0.955	0.961	0.96	0.965	61275.5	56222	52075.4	70554.2	57477.6	68384.8
evm.model.Chr12.709_S151	RGKRMPEDLASADDIREYKQI	evm.model.Chr12.709	MPEDLAsADDIR	1	0	1	1	1	0	0	189238	163584	197504	80848.2	83270.9	102816
evm.model.Chr12.716_S4	*******MGISQDSWHKRRAT	evm.model.Chr12.716	GIsQDSWHK	0.963	0	0	0.963	0	0	0	77872.7	62522.1	41398.1	0	0	55430.8
evm.model.Chr12.716_S7	****MGISQDSWHKRRATGGK	evm.model.Chr12.716	GISQDsWHK	0.973	0.941	0.955	0.916	0.973	0.904	0.964	429323	401897	375058	256914	253787	243301
evm.model.Chr12.720_S439	QKKPQTALAVSPNKEEEPPTE	evm.model.Chr12.720	KPQTALAVsPNKEEEPPTETPNWR	0.961	0.961	0	0.858	0	0	0	70726.2	0	186247	0	0	0
evm.model.Chr12.720_S478	AQPTSPKPVTSPMAPKHLTSP	evm.model.Chr12.720	PVTsPMAPK	0.965	0	0.965	0	0.959	0.939	0.909	85672.7	106165	69515.4	184415	145376	62711.1
evm.model.Chr12.720_S487	TSPMAPKHLTSPQNHASPAPV	evm.model.Chr12.720	HLTsPQNHASPAPVK	0.945	0	0.945	0.564	0	0	0	58607.9	23266.4	39144.5	0	35751.9	27383.2
evm.model.Chr12.761_S195	TASADRTKRWSWGAGSGDDVT	evm.model.Chr12.761	RWsWGAGSGDDVTGNSPK;RWsWGAGsGDDVTGNSPK;WsWGAGSGDDVTGNSPK	0.969	0.968	0.969	0.967	0.953	0	0	279210	163444	493373	29517	0	18869.6
evm.model.Chr12.761_S200	RTKRWSWGAGSGDDVTGNSPK	evm.model.Chr12.761	RWsWGAGsGDDVTGNSPK;WSWGAGsGDDVTGNSPK	0.962	0.957	0.962	0.934	0	0	0	26097.8	27347.1	60392.5	0	0	0
evm.model.Chr12.761_S208	AGSGDDVTGNSPKTNGSPSTK	evm.model.Chr12.761	WSWGAGSGDDVTGNsPK	0.965	0	0	0.965	0	0	0	0	0	17659	0	0	0
evm.model.Chr12.767_S186	ADGAPPARESSAEYDKWKEQK	evm.model.Chr12.767	ESsAEYDKWK	0.964	0.958	0.964	0	0	0	0	31642.2	30530	0	0	27025.6	0
evm.model.Chr12.773.1_S1021	SSDKYQTAPPSPVRPIV****	evm.model.Chr12.773.1	YQTAPPsPVRPIV	0.973	0.966	0.962	0.967	0.973	0.973	0.97	448060	419922	723464	105514	175348	268030
evm.model.Chr12.773.1_S757	ETVATSNENNSNKVSLVAVDN	evm.model.Chr12.773.1	YQTNEKPPNPPAAETVATSNENNsNK	0.907	0	0	0.907	0	0	0	0	0	22764.4	0	0	0
evm.model.Chr12.773.1_S787	SNNKKIGETPSPEQRKIAHVT	evm.model.Chr12.773.1	IGETPsPEQR;IGEtPsPEQR;KIGETPsPEQR;KIGEtPsPEQR	1	1	1	1	1	1	1	607142	809157	596670	675262	795443	910336
evm.model.Chr12.773.1_S987	SRYAQPTLRDSPARSNKSPMT	evm.model.Chr12.773.1	YAQPTLRDsPAR	0.971	0.962	0.97	0.968	0	0.971	0.888	290939	256844	202790	203964	232516	214259
evm.model.Chr12.773.1_T785	LLSNNKKIGETPSPEQRKIAH	evm.model.Chr12.773.1	IGEtPsPEQR;KIGEtPsPEQR	1	1	1	1	1	1	1	307777	321235	313513	333383	335238	329210
evm.model.Chr12.773.1_T797	SPEQRKIAHVTPMQKGEDIQY	evm.model.Chr12.773.1	IAHVtPMQK	1	1	0	1	0	0	0	49438.4	54893.4	49848	42831.1	58511.3	36412.3
evm.model.Chr12.781_S125	RKKFSRLRTVSSDEDVSDDET	evm.model.Chr12.781	TVsSDEDVSDDETDTR	0.954	0	0.773	0.954	0	0.489	0.472	54408.5	46206.4	49821.5	0	36280.6	29961.8
evm.model.Chr12.781_S126	KKFSRLRTVSSDEDVSDDETD	evm.model.Chr12.781	TVSsDEDVSDDETDTR;TVSsDEDVsDDETDTR	0.952	0.952	0.908	0.762	0	0	0	77278.6	105589	145757	0	0	55999.5
evm.model.Chr12.781_S131	LRTVSSDEDVSDDETDTRAAI	evm.model.Chr12.781	TVSSDEDVsDDETDTR;TVSsDEDVsDDETDTR	0.952	0.952	0.908	0	0	0	0	78647.5	165374	172634	0	28331.3	55868.4
evm.model.Chr12.781_S30	PTKKAALEFDSEDEEENEKAL	evm.model.Chr12.781	AALEFDsEDEEENEK;KAALEFDsEDEEENEK	1	1	1	1	1	1	1	1.83546e+06	1.83389e+06	1.94669e+06	1.02289e+06	1.31676e+06	1.37293e+06
evm.model.Chr12.782_S183	IPTHLMNRAPSGGASVAANTP	evm.model.Chr12.782	APsGGASVAANTPK	0.962	0.962	0	0	0	0	0	24218.8	0	0	0	27771.6	0
evm.model.Chr12.782_S241	TPSGSYRGQRSPAASMLPPKS	evm.model.Chr12.782	sPAASMLPPK	0.971	0.97	0.969	0.967	0	0.971	0	108197	104511	130654	85437.4	83487.9	81131
evm.model.Chr12.782_S298	EWVKQQRGTKSPHMTPSTPKG	evm.model.Chr12.782	GTKsPHMTPSTPK;sPHMTPSTPK	0.973	0.961	0	0.968	0.973	0.971	0	253998	232692	230355	264677	217994	195685
evm.model.Chr12.782_T192	PSGGASVAANTPKVRTPSMRQ	evm.model.Chr12.782	APSGGASVAANtPK	0.961	0.961	0	0	0	0	0	16575	0	0	0	0	0
evm.model.Chr12.782_T263	PLAKWGTPNMTPKRTPKSSGR	evm.model.Chr12.782	WGTPNMtPK	0.972	0.969	0.957	0.965	0.972	0.972	0.97	72685.4	66966.2	62137.1	104339	101942	120823
evm.model.Chr12.786_S63	IVALKKIRLESEEEGVPSTAI	evm.model.Chr12.786	LEsEEEGVPSTAIR	0.964	0	0	0.964	0	0	0	0	0	5817.43	0	0	0
evm.model.Chr12.786_T38	YVKIEKIGEGTYGVVYKGRNK	evm.model.Chr12.786	IGEGtYGVVYK;IGEGtyGVVYK	0.974	0.971	0.971	0.968	0.974	0.974	0.973	2.33307e+06	2407650	2.43333e+06	1.90944e+06	2486106	2.92876e+06
evm.model.Chr12.786_Y39	VKIEKIGEGTYGVVYKGRNKK	evm.model.Chr12.786	IGEGTyGVVYK;IGEGtyGVVYK	0.975	0.971	0.971	0.968	0.975	0.974	0.973	3301066	3312166	3388214	2.94485e+06	3512231	3797197
evm.model.Chr12.787_S798	SSVRSAQTLTSPSNKSSKPNT	evm.model.Chr12.787	SAQTLTsPSNK	0.971	0.948	0.969	0.967	0.964	0.971	0.966	1.16404e+06	1020574	935435	1.1524e+06	1.13018e+06	1.19417e+06
evm.model.Chr12.86_S3241	IQSSMKEAGDSPATKRSKHGN	evm.model.Chr12.86	EAGDsPATKR	0.969	0.968	0.968	0.966	0.969	0.969	0.965	33662.1	26022.4	20593.6	0	0	0
evm.model.Chr13.138_S60	TDIDRLNEQASEEILKVEQKY	evm.model.Chr13.138	LNEQAsEEILK	1	0	0	1	1	1	1	177863	176128	176066	170491	227388	201457
evm.model.Chr13.156_evm.model.Chr13.157_S129	LRNNLLQNGLSHKNDRHSRVK	evm.model.Chr13.156_evm.model.Chr13.157	NNLLQNGLsHK	1	1	1	1	0	1	1	31295.9	62801.2	52285.7	30007.2	42062.1	0
evm.model.Chr13.159_S537	QSKRLNEQRVSLSTLPGLRIN	evm.model.Chr13.159	VsLSTLPGLR	0.968	0.967	0.967	0.968	0	0	0	14670.3	8656.53	52304.7	0	0	0
evm.model.Chr13.188_S522	RSEFDSEQNTSLEREDEERMT	evm.model.Chr13.188	SEFDSEQNTsLER;SEFDSEQNTsLEREDEER	0.971	0.966	0.954	0.961	0.971	0.947	0.963	173474	434309	522738	166011	209734	123572
evm.model.Chr13.224_S236	ASGDFTERRLSYQAVEGGRPH	evm.model.Chr13.224	RLsYQAVEGGR;RLsYQAVEGGRPH	0.97	0.962	0.969	0.966	0.968	0.97	0.968	282064	248193	291605	135400	201588	223149
evm.model.Chr13.249_S605	KGVDRGAKKKSVGNQVIRKGW	evm.model.Chr13.249	sVGNQVIR	1	1	1	1	1	1	1	21039.3	22129.4	26230.5	27036.4	22438.9	43855.3
evm.model.Chr13.249_S728	ERSTEVKDSGSPGGESQSLDP	evm.model.Chr13.249	DSGsPGGESQSLDPQLER	0.972	0.968	0.97	0.968	0	0.971	0.972	996290	983657	1.09152e+06	518461	734946	781397
evm.model.Chr13.249_T49	VMAYQLEERGTPNTLDYRIYY	evm.model.Chr13.249	GtPNTLDYR	0.973	0.97	0.971	0.968	0.973	0.973	0.972	101233	91290	76629.2	126110	88128.7	125001
evm.model.Chr13.262_S138	IGRAGTVRRQSVDVSPLRRVN	evm.model.Chr13.262	QsVDVSPLR;RQsVDVSPLR	0.972	0.969	0.968	0.932	0.972	0.972	0.972	603158	561249	576648	416858	459816	501694
evm.model.Chr13.263_S193	YLDSRTRRNLSVVSSELQEVQ	evm.model.Chr13.263	NLsVVSSELQEVQK	0.963	0	0	0.963	0	0	0	0	0	8228.61	0	0	0
evm.model.Chr13.328_S103	KINEYFEPTTSPARNNYGLSE	evm.model.Chr13.328	INEYFEPTTsPAR;KINEYFEPTTsPAR	0.971	0.965	0.968	0.963	0.925	0.971	0.971	1200388	1.11141e+06	1.4243e+06	443183	809518	956224
evm.model.Chr13.328_S50	AGPSSDRENDSVGGYPSTPET	evm.model.Chr13.328	ENDsVGGYPSTPETHEK	0.967	0.931	0.963	0.961	0	0.967	0.962	46281.9	40939.5	37753.4	0	27548.7	28072.9
evm.model.Chr13.328_S56	RENDSVGGYPSTPETHEKQDG	evm.model.Chr13.328	ENDSVGGYPsTPETHEK;ENDSVGGYPstPETHEK	0.96	0.96	0.694	0	0	0	0	80941.8	97059.6	62387.2	0	0	0
evm.model.Chr13.328_T102	KKINEYFEPTTSPARNNYGLS	evm.model.Chr13.328	KINEYFEPTtSPAR	0.919	0	0	0.919	0	0	0	0	0	104746	0	0	0
evm.model.Chr13.328_T57	ENDSVGGYPSTPETHEKQDGR	evm.model.Chr13.328	ENDSVGGYPStPETHEK;ENDSVGGYPstPETHEK	0.949	0.949	0.759	0.93	0	0	0	82327.1	63692.5	92578.9	0	0	0
evm.model.Chr13.331_S1008	HRVVQSSAPASESPRPADARD	evm.model.Chr13.331	VVQSSAPAsESPR;VVQSSAPAsESPRPADAR;VVQSSAPAsEsPRPADAR	0.968	0.964	0.964	0.968	0.964	0.963	0.963	495899	513942	424286	425191	210658	306381
evm.model.Chr13.331_S1010	VVQSSAPASESPRPADARDQI	evm.model.Chr13.331	VVQSSAPASEsPR;VVQSSAPASEsPRPADAR;VVQSSAPAsEsPRPADAR	0.968	0.964	0.964	0.968	0.964	0.954	0.967	2.48287e+06	1.83263e+06	1.80855e+06	1135076	1.53516e+06	1496284
evm.model.Chr13.331_S316	RKLTDSQKPKSSDDEKEAETN	evm.model.Chr13.331	LTDSQKPKssDDEK	0.963	0	0.959	0.963	0	0.956	0	0	23096.3	21178.7	0	13204.8	0
evm.model.Chr13.331_S317	KLTDSQKPKSSDDEKEAETNE	evm.model.Chr13.331	LTDSQKPKssDDEK	0.963	0	0.959	0.963	0	0.957	0	0	23096.3	21178.7	0	13204.8	0
evm.model.Chr13.331_S40	ILFRNEGGRRSMSLSPIRTES	evm.model.Chr13.331	sMSLSPIR;sMSLsPIR	0.971	0.968	0.968	0.968	0	0.968	0.971	76315.7	85464.6	76699.7	124231	121000	109720
evm.model.Chr13.331_S42	FRNEGGRRSMSLSPIRTESGA	evm.model.Chr13.331	SMsLsPIR	0.97	0	0.933	0.964	0	0.961	0.97	86918.6	136900	157230	31347.1	130610	105161
evm.model.Chr13.331_S44	NEGGRRSMSLSPIRTESGAKL	evm.model.Chr13.331	SMSLsPIR;SMsLsPIR;sMSLsPIR	0.971	0.946	0.969	0.964	0.962	0.961	0.971	370650	235261	221625	194160	300598	355464
evm.model.Chr13.331_S500	PSGTGHIPGFSPDRKQEVGQK	evm.model.Chr13.331	APSGTGHIPGFsPDR;APSGTGHIPGFsPDRK	0.972	0.97	0.97	0.965	0.972	0.969	0.971	3.55707e+06	2912563	4.43311e+06	763233	1.68842e+06	1.83247e+06
evm.model.Chr13.331_S645	RKKKRRGHKQSDDDAKIDEKL	evm.model.Chr13.331	GHKQsDDDAKIDEK	1	1	1	1	0	0	0	0	34249	40345.4	0	0	0
evm.model.Chr13.331_S665	LKKKKKKRKDSVADVESPIRE	evm.model.Chr13.331	DsVADVESPIR;DsVADVEsPIR;KDsVADVESPIR;KDsVADVEsPIR;KDsVADVEsPIREK	1	1	1	1	0.971	1	0.952	349646	324945	271750	64213.6	287381	314687
evm.model.Chr13.331_S671	KRKDSVADVESPIREKKRKKK	evm.model.Chr13.331	DSVADVEsPIR;DSVADVEsPIREK;DsVADVEsPIR;KDSVADVEsPIR;KDsVADVEsPIR;KDsVADVEsPIREK	1	1	1	1	0.969	1	0.973	1.17763e+06	1.12942e+06	1008155	741189	1.01267e+06	1.03972e+06
evm.model.Chr13.331_S691	KKKAKDRDDDSDAEISKKMEK	evm.model.Chr13.331	AKDRDDDsDAEISK;DRDDDsDAEISK	0.973	0.97	0.957	0.962	0.973	0.96	0.971	357972	376775	367691	419807	398224	371266
evm.model.Chr13.331_S707	KKMEKKKRSGSTAEDLIRHIP	evm.model.Chr13.331	SGsTAEDLIR	0.972	0.968	0.956	0.963	0.968	0.972	0.953	1.33234e+06	1290323	1.35738e+06	1.56096e+06	120439	1.73449e+06
evm.model.Chr13.331_S847	SHSRSRSRSRSKSKSLPKAYN	evm.model.Chr13.331	sKsKsLPK	1	0	0	1	0	0	0	0	28681	34634	0	0	76982
evm.model.Chr13.331_S849	SRSRSRSRSKSKSLPKAYNDS	evm.model.Chr13.331	sKsKsLPK	1	0	0	1	0	0	0	0	28681	34634	0	0	76982
evm.model.Chr13.331_S851	SRSRSRSKSKSLPKAYNDSRD	evm.model.Chr13.331	sKsKsLPK	1	0	0	1	0	0	0	0	28681	34634	0	0	76982
evm.model.Chr13.331_S868	DSRDYERREASQEMDRRRSLS	evm.model.Chr13.331	EAsQEMDR;REAsQEMDR	1	0	0	1	1	1	0	117640	135751	137945	119408	61845.4	104585
evm.model.Chr13.331_T205	IAAKKVEKQTTPQAPVEVVEP	evm.model.Chr13.331	QTtPQAPVEVVEPEHGSAAMQMEK	0.957	0	0	0.957	0	0	0	0	0	17701.6	0	0	0
evm.model.Chr13.385_S100	NQLKFARSLQSVAEERVGRHC	evm.model.Chr13.385	SLQsVAEER	0.971	0.964	0.97	0.967	0.949	0.971	0.971	41328.6	42569.4	37213.4	35597.9	44417.5	56541.5
evm.model.Chr13.385_S97	QGVNQLKFARSLQSVAEERVG	evm.model.Chr13.385	sLQSVAEER	0.972	0.969	0	0.968	0.964	0.972	0.971	44200.3	47293.5	40640.7	49627	45515.1	54210.4
evm.model.Chr13.385_T183	GLGKGHKFNQTIGGSRRAAWK	evm.model.Chr13.385	FNQtIGGSR	0.968	0	0.949	0.968	0.863	0	0.958	0	15373.1	14433.7	27361	33035	0
evm.model.Chr13.386_S365	QETIEIKIGDSPPAGRMVAPY	evm.model.Chr13.386	IGDsPPAGR	1	1	1	1	1	1	1	1191736	1.08839e+06	929312	2135770	2.15792e+06	1.81323e+06
evm.model.Chr13.388_S2	*********MSESEPRSPLPD	evm.model.Chr13.388	sESEPRsPLPDGWVK	0.943	0	0	0.943	0	0	0	0	0	45700.5	0	0	0
evm.model.Chr13.388_S8	***MSESEPRSPLPDGWVKKE	evm.model.Chr13.388	SESEPRsPLPDGWVK;sESEPRsPLPDGWVK;sPLPDGWVK	1	1	1	1	1	1	1	2631188	2485817	3.73358e+06	1.5089e+06	2.33835e+06	2.41433e+06
evm.model.Chr13.393_S1495	VHGPNADEMRSPRQSRRYSSS	evm.model.Chr13.393	YEVHGPNADEMRsPR	0.97	0.97	0.97	0.968	0	0	0	418114	241793	615674	0	0	70713.6
evm.model.Chr13.393_S862	SKLDDDYEVLSQGEEGTMMRR	evm.model.Chr13.393	LDDDYEVLsQGEEGTMMR	0.964	0.964	0	0	0	0	0	19040.9	0	26769.8	0	0	0
evm.model.Chr13.403_S1093	RSSPKMKRPASEDFDHTGETT	evm.model.Chr13.403	RPAsEDFDHTGETTVQTR	0.968	0.948	0.958	0.962	0.967	0	0.968	496547	386047	596906	125366	0	61553.5
evm.model.Chr13.403_S1112	TTVQTRSRPLSDHEQSKKKLD	evm.model.Chr13.403	SRPLsDHEQSK	0.968	0.857	0.595	0.89	0.968	0.935	0.796	329216	326849	310143	265541	228445	196740
evm.model.Chr13.403_S1138	QPTPTKERRPSAGAPPSGKAP	evm.model.Chr13.403	ERRPsAGAPPSGK;RPsAGAPPSGK	0.97	0.97	0.97	0.964	0.96	0.969	0.962	1.28767e+06	1.27942e+06	1.22685e+06	1.10995e+06	1.18113e+06	891577
evm.model.Chr13.403_S1149	AGAPPSGKAPSREPTWYKPGS	evm.model.Chr13.403	APsREPTWYKPGSK	0.964	0.963	0.964	0.939	0	0	0	25646	19799.6	31656.4	0	0	0
evm.model.Chr13.403_S1188	SSYKQAVKTDSLNEMMSNIEL	evm.model.Chr13.403	TDsLNEMMSNIELEKPK;TDsLNEMMSNIELEKPKPAPR	0.96	0.96	0	0.96	0	0	0	84959.2	0	190320	0	0	0
evm.model.Chr13.403_S1211	PKPAPRRNKESFIQWNQPSSP	evm.model.Chr13.403	NKEsFIQWNQPSSPPKPAR	0.96	0	0	0.96	0	0	0	0	0	18381.3	0	0	0
evm.model.Chr13.403_S1219	KESFIQWNQPSSPPKPARRSN	evm.model.Chr13.403	ESFIQWNQPsSPPK;ESFIQWNQPsSPPKPAR	0.958	0.843	0.495	0.958	0	0	0	570394	169514	1.28658e+06	0	0	0
evm.model.Chr13.403_S1220	ESFIQWNQPSSPPKPARRSNT	evm.model.Chr13.403	ESFIQWNQPSsPPK;ESFIQWNQPSsPPKPAR	0.955	0.951	0.943	0.955	0	0	0	469445	174515	944534	0	0	0
evm.model.Chr13.403_S376	SGPQMHANPESPPSGGKRRPG	evm.model.Chr13.403	SGAPSSGPQMHANPEsPPSGGK	0.956	0	0.49	0.956	0	0	0	0	14527.8	53720.7	0	0	0
evm.model.Chr13.403_S656	RELDAAQITRSIHDSLDDYKS	evm.model.Chr13.403	sIHDSLDDYK	0.752	0.752	0	0	0	0	0	39670	0	39267.3	0	0	0
evm.model.Chr13.403_S660	AAQITRSIHDSLDDYKSSGDP	evm.model.Chr13.403	SIHDsLDDYK	0.97	0	0.947	0	0.97	0.941	0.969	54722	41497.4	49148.7	32174.7	18125.7	55214.4
evm.model.Chr13.403_S859	GELERELNLLSPTHYKQSGGS	evm.model.Chr13.403	ELNLLsPTHYK	0.968	0.943	0.968	0.957	0.885	0.652	0.941	127622	85966.5	273794	32141.8	42144.4	29584.5
evm.model.Chr13.403_S915	DNVPGRSRNMSIQLPATSPEN	evm.model.Chr13.403	NMsIQLPATSPENR	0.896	0	0	0.896	0	0	0	31078.1	131271	40533.7	97778.5	0	139316
evm.model.Chr13.403_S922	RNMSIQLPATSPENRAWIRGG	evm.model.Chr13.403	NMSIQLPATsPENR	0.969	0.965	0.962	0.965	0.964	0.969	0.958	217893	211266	317622	44193.7	84356.5	109865
evm.model.Chr13.403_T1153	PSGKAPSREPTWYKPGSKQRR	evm.model.Chr13.403	EPtWYKPGSK	0.971	0.964	0.968	0.966	0.97	0.97	0.971	980587	947897	918876	670488	774885	831068
evm.model.Chr13.403_T1541	EEFTTEKPVLTPPRENPRKLT	evm.model.Chr13.403	PVLtPPR	1	1	1	1	0	1	1	31836.6	58425.1	67051.5	0	59162	86624.7
evm.model.Chr13.406_S34	ERVCLQPTRRSVNWTSDTVDN	evm.model.Chr13.406	sVNWTSDTVDNENMGK	0.968	0.968	0.968	0.965	0	0	0	7575.77	11001.3	16102.7	0	0	0
evm.model.Chr13.49_S275	KPHVEEGVESSPRNSMNFTRG	evm.model.Chr13.49	LKPHVEEGVESsPR	0.947	0	0	0.947	0	0	0	0	0	52248.9	0	0	0
evm.model.Chr13.49_T371	VEVGEIKRSSTMDDVVNKDES	evm.model.Chr13.49	SStMDDVVNK	0.913	0	0.913	0	0	0	0	0	11690.5	0	0	0	19383.4
evm.model.Chr13.86_S4	*******MADSGSDSEAEPTV	evm.model.Chr13.86	ADsGSDSEAEPTVADDVVVTK;ADsGsDSEAEPTVADDVVVTK	0.959	0.959	0.941	0.948	0.331	0.486	0.331	228140	277286	833474	38135.2	26845.9	72767.6
evm.model.Chr13.86_S6	*****MADSGSDSEAEPTVAD	evm.model.Chr13.86	ADsGsDSEAEPTVADDVVVTK	0.948	0.654	0.941	0.948	0	0	0	17689.1	30061.7	576399	0	0	0
evm.model.Chr13.86_S8	***MADSGSDSEAEPTVADDV	evm.model.Chr13.86	ADSGSDsEAEPTVADDVVVTK	0.962	0.962	0	0.489	0	0	0	225472	200554	253119	2482.55	0	0
evm.model.Chr13.86_T28	VVVTKYKMAGTMANNVMKKLI	evm.model.Chr13.86	yKMAGtMANNVMK	1	0	0	0	1	0	0	0	0	0	589443	0	0
evm.model.Chr13.86_Y23	TVADDVVVTKYKMAGTMANNV	evm.model.Chr13.86	yKMAGtMANNVMK	1	0	0	0	1	0	0	0	0	0	589443	0	0
evm.model.Chr13.9.1_S210	ANCRVALRSDSYVLHKILPNK	evm.model.Chr13.9.1	SDsYVLHK	0.873	0	0.809	0.873	0	0	0	0	46744.1	42756.8	0	0	0
evm.model.Chr13.92_S336	SEIKNLSRHPSFSSPAVSPKH	evm.model.Chr13.92	HPsFSSPAVSPK;HPsFSSPAVsPK;HPsFSsPAVsPK	0.969	0.966	0.965	0.955	0.555	0.969	0.967	1.56754e+06	1.72895e+06	1.76777e+06	1.4275e+06	1.59842e+06	1.47566e+06
evm.model.Chr13.92_S338	IKNLSRHPSFSSPAVSPKHMP	evm.model.Chr13.92	HPSFsSPAVsPK;HPSFssPAVsPK	0.965	0	0	0.617	0.965	0.614	0.921	618482	478225	456480	373598	333251	0
evm.model.Chr13.92_S339	KNLSRHPSFSSPAVSPKHMPW	evm.model.Chr13.92	HPSFSsPAVSPK;HPSFSsPAVsPK;HPSFssPAVsPK;HPsFSsPAVsPK	0.965	0.942	0.952	0.767	0.965	0	0.953	1.08097e+06	666382	1.7726e+06	187842	0	535763
evm.model.Chr13.92_S343	RHPSFSSPAVSPKHMPWSKSS	evm.model.Chr13.92	HPSFSSPAVsPK;HPSFSsPAVsPK;HPSFsSPAVsPK;HPSFssPAVsPK;HPsFSSPAVsPK;HPsFSsPAVsPK	0.972	0.966	0.969	0.967	0.967	0.972	0.955	2063021	1.99542e+06	2.0523e+06	1.38832e+06	1.56108e+06	1.76797e+06
evm.model.Chr13.92_S5	******MAVSSLYDENETNEQ	evm.model.Chr13.92	AVSsLYDENETNEQLK;AVSsLYDENETNEQLKR	0.968	0.968	0.962	0.964	0	0.96	0	310618	267017	457411	83526	142520	162705
evm.model.Chr2.1004_S100	CQDKVKDNVTSQGALSTADER	evm.model.Chr2.1004	DNVTsQGALSTADER	0.942	0.942	0.89	0.928	0	0	0	24153	21037.1	21822.2	0	27394.1	0
evm.model.Chr2.1004_T106	DNVTSQGALSTADERIFGDCM	evm.model.Chr2.1004	DNVTSQGALStADER	0.965	0.965	0	0.919	0	0	0	18592.6	0	12503.8	0	0	0
evm.model.Chr2.114_S429	RNIRYQRSDRSDDGVTSPRRR	evm.model.Chr2.114	SDRsDDGVTSPR;SDRsDDGVTsPR	0.965	0.955	0.956	0.965	0.913	0.912	0.912	1.01872e+06	1.0701e+06	1.0377e+06	944098	927568	837699
evm.model.Chr2.114_S435	RSDRSDDGVTSPRRRSRTSST	evm.model.Chr2.114	SDDGVTsPR;SDRsDDGVTsPR	0.968	0.958	0.967	0.962	0.965	0.963	0.968	458255	464284	458485	583669	574017	558151
evm.model.Chr2.114_S444	TSPRRRSRTSSTRSEDAVEPH	evm.model.Chr2.114	TSsTRSEDAVEPHPSPNEAK;TSsTRsEDAVEPHPSPNEAK;TSsTRsEDAVEPHPsPNEAK	0.926	0	0.592	0.926	0	0.818	0	676734	242760	243553	105080	485762	135980
evm.model.Chr2.114_S447	RRRSRTSSTRSEDAVEPHPSP	evm.model.Chr2.114	TSSTRsEDAVEPHPSPNEAK;TSsTRsEDAVEPHPSPNEAK;TSsTRsEDAVEPHPsPNEAK;sEDAVEPHPSPNEAK;sEDAVEPHPsPNEAK	1	1	1	1	1	1	1	1.10714e+06	1.1063e+06	725272	624702	554859	620578
evm.model.Chr2.114_S456	RSEDAVEPHPSPNEAKKPQYK	evm.model.Chr2.114	SEDAVEPHPsPNEAK;TSsTRsEDAVEPHPsPNEAK;sEDAVEPHPsPNEAK	1	1	1	1	1	1	1	1050024	874899	979866	619727	670274	790938
evm.model.Chr2.114_S639	KSKFALLAVDSGEEDEME***	evm.model.Chr2.114	FALLAVDsGEEDEME	1	1	1	1	1	0	0	9257.8	7320.88	46096	0	0	0
evm.model.Chr2.114_T370	QEKLILQKVQTKPPTPTHTPS	evm.model.Chr2.114	VQtKPPTPTHTPSQASIFGNAK	0.96	0	0.96	0	0	0	0	0	9213.21	104495	0	0	0
evm.model.Chr2.114_T374	ILQKVQTKPPTPTHTPSQASI	evm.model.Chr2.114	VQTKPPtPTHTPSQASIFGNAK	0.964	0	0	0.964	0	0	0	234355	135867	502713	0	0	0
evm.model.Chr2.114_T614	TEEAKKKEGTTPPTMQKEERV	evm.model.Chr2.114	EGTtPPTMQK	0.969	0	0	0	0.969	0.961	0	0	0	78158.8	88059.5	41667.5	55982
evm.model.Chr2.132_evm.model.Chr2.133_S109	ASLAPAKRRESFLYRSDNEFD	evm.model.Chr2.132_evm.model.Chr2.133	REsFLYR	0.964	0.964	0.896	0	0	0	0	26517.8	21298.7	0	0	0	0
evm.model.Chr2.132_evm.model.Chr2.133_S122	YRSDNEFDQSSPKIGSRNSSV	evm.model.Chr2.132_evm.model.Chr2.133	SDNEFDQSsPK	0.969	0.949	0.969	0.963	0.966	0.96	0.964	152431	142794	127849	152905	154110	134335
evm.model.Chr2.132_evm.model.Chr2.133_S291	PSEDKEKRPASPNYGLMSKSF	evm.model.Chr2.132_evm.model.Chr2.133	RPAsPNYGLMSK	0.97	0.964	0.963	0.95	0.97	0.968	0.965	226827	369510	382191	244613	319868	314437
evm.model.Chr2.135_S154	KKESTGAKESSENGEEEQLPD	evm.model.Chr2.135	ESsENGEEEQLPDTTTDQPSSSK	0.963	0	0	0.96	0	0	0.963	195440	0	184997	0	122303	139304
evm.model.Chr2.135_S255	QNLAQRAKVSSIPDSSLLFKS	evm.model.Chr2.135	VSsIPDSSLLFK	0.959	0	0	0.959	0	0	0	0	0	12779.7	0	0	0
evm.model.Chr2.135_S45	MVGSSTEPIDSEPEEKRPTFR	evm.model.Chr2.135	ADMVGSSTEPIDsEPEEK	0.968	0.968	0	0.968	0	0	0	175607	182940	295651	75153.9	119198	109256
evm.model.Chr2.135_S7	****MSQNLNSPLKLNDKKTS	evm.model.Chr2.135	SQNLNsPLK	0.962	0.948	0.955	0.942	0.962	0.96	0.949	453515	456615	402975	625828	555476	587795
evm.model.Chr2.146_S148	PSSPLTNRQGSVSSTASPKHA	evm.model.Chr2.146	QGsVSSTASPK	0.972	0.964	0.966	0.965	0.971	0.972	0.969	33533.6	34152.6	14025.6	33869.7	27707.2	30116.1
evm.model.Chr2.146_S154	NRQGSVSSTASPKHAPSVQSS	evm.model.Chr2.146	QGSVSSTAsPK	0.97	0.963	0.966	0.877	0.966	0.97	0	64916	66844.6	52323.4	85760.1	89022.3	80593.8
evm.model.Chr2.146_S772	GKSTFTPDFSSMGKSKEPSKA	evm.model.Chr2.146	STFTPDFSsMGK	0.947	0.947	0	0	0	0	0	24523.1	0	0	0	0	0
evm.model.Chr2.168_S1486	KYTDGTGRRLSDPFLQLPARK	evm.model.Chr2.168	RLsDPFLQLPAR	1	0	0	1	0	0	0	0	0	9616.6	0	0	0
evm.model.Chr2.168_S1525	KDRVKLHKYRSLDDMERDFQQ	evm.model.Chr2.168	YRsLDDMER	0.95	0.95	0	0.948	0	0	0.945	26124.4	0	16454.7	0	24195.8	25292.8
evm.model.Chr2.168_S1579	EKTNTLPPEQSDNDDSMHAVD	evm.model.Chr2.168	TNTLPPEQsDNDDSMHAVDEDSR	0.957	0.955	0.33	0.957	0	0	0	54092.2	40252	86538.9	0	0	0
evm.model.Chr2.168_S1626	DEPLLVKIRLSKEESSDAHKK	evm.model.Chr2.168	IRLsKEESSDAHK	0.967	0	0	0.967	0	0	0	0	0	68034.1	0	0	0
evm.model.Chr2.168_S683	KKKGKRKSKKSEGEEENKDVD	evm.model.Chr2.168	KsEGEEENKDVDR;sEGEEENKDVDR	1	1	1	1	1	1	1	100610	108054	102496	47332.3	57802.1	46342.4
evm.model.Chr2.168_S736	PNFEVAPRVESDDEEEEEEPP	evm.model.Chr2.168	VEsDDEEEEEEPPKEEVAK	1	1	1	1	0	1	0	416548	402617	407554	168806	226032	0
evm.model.Chr2.168_T449	LQMPPKTNKITPLKKPEGIDP	evm.model.Chr2.168	TNKItPLK	0.967	0.967	0	0.876	0	0	0	49359.7	38751.1	36000.5	37829.4	0	0
evm.model.Chr2.176_S372	KLDKYQSPKPSSPPQAPPMHA	evm.model.Chr2.176	PsSPPQAPPMHAGYR	0.926	0.926	0	0.494	0	0	0	21378.7	0	11494.4	0	9802.73	0
evm.model.Chr2.176_S373	LDKYQSPKPSSPPQAPPMHAG	evm.model.Chr2.176	PSsPPQAPPMHAGYR	0.952	0.952	0	0	0	0	0	221453	160840	74668.9	0	56528.3	74953.5
evm.model.Chr2.177_S85	EKENSINRLGSLNNCTDEQHK	evm.model.Chr2.177	LGsLNNCTDEQHK	0.971	0.817	0.968	0.968	0.808	0.971	0.964	115889	91983.9	86836.8	70455	88019.7	83175.9
evm.model.Chr2.179_S135	FKADENLNDLSSEDEIQQKLN	evm.model.Chr2.179	ADENLNDLssEDEIQQK	1	1	1	1	0	0	0	54965	146693	378113	0	0	0
evm.model.Chr2.179_S136	KADENLNDLSSEDEIQQKLNR	evm.model.Chr2.179	ADENLNDLSsEDEIQQK;ADENLNDLssEDEIQQK	1	1	1	1	0	0.969	0.961	169082	257426	520827	0	59495.8	59428.7
evm.model.Chr2.196_S243	KKEETKQMLTSPSTSSPTVKS	evm.model.Chr2.196	QMLTsPSTSSPTVK	0.971	0.968	0.969	0.934	0.971	0.971	0.97	399615	384136	351333	333219	373676	384462
evm.model.Chr2.196_S248	KQMLTSPSTSSPTVKSLELGD	evm.model.Chr2.196	QMLTSPSTSsPTVK	0.929	0	0.929	0	0	0	0	0	37832.8	40918.9	0	0	0
evm.model.Chr2.198_S244	RRRMMMQSGRSKEDIMYKGTI	evm.model.Chr2.198	sKEDIMYK	0.969	0.969	0	0	0	0	0	70650.9	58597.4	37654.5	56427.1	34739.3	33043.6
evm.model.Chr2.198_S301	DELKSLFFGTSVH********	evm.model.Chr2.198	SLFFGTsVH	0.933	0	0	0.933	0	0	0	0	0	11233.9	0	0	0
evm.model.Chr2.203_S92	DPKSGRTRQDSFQSDDDPDNE	evm.model.Chr2.203	QDsFQSDDDPDNEENLTPEQR;QDsFQsDDDPDNEENLTPEQR;TRQDsFQSDDDPDNEENLTPEQR;TRQDsFQsDDDPDNEENLTPEQR	0.971	0.967	0.97	0.969	0.495	0.956	0.971	1.35162e+06	1.43593e+06	1.701e+06	25088.8	173753	575641
evm.model.Chr2.203_S95	SGRTRQDSFQSDDDPDNEENL	evm.model.Chr2.203	QDSFQsDDDPDNEENLTPEQR;QDSFQsDDDPDNEENLtPEQR;QDsFQsDDDPDNEENLTPEQR;TRQDSFQsDDDPDNEENLTPEQR;TRQDsFQsDDDPDNEENLTPEQR	0.971	0.968	0.97	0.969	0	0.95	0.971	1.65023e+06	1.49495e+06	2.27077e+06	0	479514	578822
evm.model.Chr2.203_T106	DDDPDNEENLTPEQREKRKKF	evm.model.Chr2.203	QDSFQSDDDPDNEENLtPEQR;QDSFQsDDDPDNEENLtPEQR	0.967	0.939	0.967	0.966	0	0	0.958	62484.9	58849.1	129429	0	0	28998.7
evm.model.Chr2.203_T55	YGHMKIDEPKTPYRSDRDDEA	evm.model.Chr2.203	IDEPKtPYR	0.972	0.92	0.961	0.922	0.97	0.972	0.952	79604.5	97272	99264.6	80402.9	94264.4	92026.1
evm.model.Chr2.226_S1960	VQEKLNRTSGSTPVLPRGNTQ	evm.model.Chr2.226	TSGsTPVLPR	0.951	0	0.951	0	0.435	0	0	0	31175.2	0	0	45521.7	30560.9
evm.model.Chr2.226_T1961	QEKLNRTSGSTPVLPRGNTQT	evm.model.Chr2.226	TSGStPVLPR	0.957	0.957	0	0.952	0	0.931	0.946	37044.8	0	21257.5	0	0	0
evm.model.Chr2.230_S308	QDPEDEGKPPSA*********	evm.model.Chr2.230	HVQDPEDEGKPPsA	1	1	1	1	1	1	1	156965	156979	143153	72605.4	115983	99232.1
evm.model.Chr2.241_S16	ETKSARVKGLSFHPKRPWVLS	evm.model.Chr2.241	GLsFHPK	1	1	0	1	0	0	1	13791.7	0	13023.3	0	0	35300.2
evm.model.Chr2.241_S173	DISGLRKKNLSPGGSSIEETI	evm.model.Chr2.241	KNLsPGGSSIEETIR;NLsPGGSSIEETIR;NLsPGGSsIEETIR;NLsPGGsSIEETIR	0.973	0.969	0.97	0.966	0.973	0.972	0.97	3.34316e+06	2.69777e+06	4.84999e+06	829030	1311579	1.65606e+06
evm.model.Chr2.241_S177	LRKKNLSPGGSSIEETIRGTP	evm.model.Chr2.241	NLsPGGsSIEETIR	0.788	0.788	0	0.772	0	0	0	29720.3	31566.4	50731	0	0	0
evm.model.Chr2.241_S178	RKKNLSPGGSSIEETIRGTPG	evm.model.Chr2.241	NLSPGGSsIEETIR;NLsPGGSsIEETIR	0.959	0.959	0.951	0	0	0	0	60278.5	67162.7	61877.7	0	0	18558.1
evm.model.Chr2.241_S293	IRVWDMGKRTSINSFRREERF	evm.model.Chr2.241	RTsINSFR	0.94	0.94	0	0	0	0.916	0	37947.8	0	0	0	33060.8	38558.7
evm.model.Chr2.241_S416	PKNVDSSNPDSPDSKRASGVT	evm.model.Chr2.241	NVDSSNPDsPDSK;NVDSSNPDsPDSKR	0.971	0.968	0.94	0.967	0.97	0.971	0.969	51006.1	130973	118352	90744.2	101025	92371.2
evm.model.Chr2.273_S109	PRDRMPPRPPSPRRERPRSPP	evm.model.Chr2.273	DRMPPRPPsPR;MPPRPPsPR	1	0	1	1	0	1	1	7488476	8947222	8297771	8661479	9098737	11100000
evm.model.Chr2.273_S117	PPSPRRERPRSPPDWRRKSPP	evm.model.Chr2.273	PRsPPDWR	1	1	1	1	1	1	1	2.77946e+06	2.59137e+06	2.50189e+06	1.87403e+06	2.24409e+06	2.18448e+06
evm.model.Chr2.273_S125	PRSPPDWRRKSPPHYYRGPPP	evm.model.Chr2.273	KsPPHYYR;RKsPPHYYR;sPPHYYR	0.974	0.969	0.97	0.968	0.974	0.918	0	696817	695520	800982	439316	625240	40233.1
evm.model.Chr2.273_S140	YRGPPPERRRSPPYWHRRSPP	evm.model.Chr2.273	RsPPYWHR;sPPYWHR	0.974	0.97	0.971	0.969	0.974	0.974	0.973	2.08758e+06	1.9905e+06	2.1871e+06	1.64469e+06	2.24266e+06	1.7619e+06
evm.model.Chr2.273_S190	HPDRRSPHRRSPPPHSWNKTW	evm.model.Chr2.273	sPPPHSWNK	0.968	0.968	0.672	0.938	0.783	0.597	0.595	2753024	0	2607602	2.06428e+06	2.33675e+06	0
evm.model.Chr2.273_S225	PTLPIAPAKVSPVPSIPSDIN	evm.model.Chr2.273	VsPVPSIPSDINK;VsPVPSIPsDINK;VsPVPsIPSDINK	0.974	0.97	0.97	0.968	0.974	0.972	0.973	2.34309e+06	2.14932e+06	2974426	1.01083e+06	1.66519e+06	2136167
evm.model.Chr2.273_S229	IAPAKVSPVPSIPSDINKADS	evm.model.Chr2.273	VSPVPsIPSDINK;VsPVPsIPSDINK	0.97	0.968	0.968	0.967	0.97	0.97	0.968	214676	196011	351518	49915.1	140527	199981
evm.model.Chr2.273_S232	AKVSPVPSIPSDINKADSNKT	evm.model.Chr2.273	VsPVPSIPsDINK	0.966	0	0.966	0	0	0	0	0	10229.7	0	0	0	0
evm.model.Chr2.273_S372	DPTNPTSVEPSVVDGSPTERK	evm.model.Chr2.273	YDPTNPTSVEPsVVDGSPTER	0.859	0	0	0	0	0.859	0.327	0	0	0	0	79829.7	119939
evm.model.Chr2.273_S377	TSVEPSVVDGSPTERKFSMAT	evm.model.Chr2.273	YDPTNPTSVEPSVVDGsPTER	0.965	0.963	0.964	0.965	0.485	0	0.485	574248	340464	930418	31028.1	97910	79458.3
evm.model.Chr2.273_S384	VDGSPTERKFSMATVPLDQIK	evm.model.Chr2.273	KFsMATVPLDQIK	0.953	0	0	0.953	0	0	0	0	0	13769.6	0	0	0
evm.model.Chr2.273_S4	*******MSRSPPPSAGRPWY	evm.model.Chr2.273	SRsPPPSAGR	0.939	0	0	0.939	0	0	0	0	0	39032.3	0	0	0
evm.model.Chr2.273_S63	PPRSAPPRGHSPTRPPSPDHK	evm.model.Chr2.273	GHsPTRPPsPDHK;GHsPTRPPsPDHKR	0.971	0.96	0.971	0.967	0	0	0	1343248	1.35584e+06	1.30663e+06	736793	696610	78727.6
evm.model.Chr2.273_S69	PRGHSPTRPPSPDHKRSGSPR	evm.model.Chr2.273	GHSPTRPPsPDHK;GHSPtRPPsPDHK;GHsPTRPPsPDHK;GHsPTRPPsPDHKR	0.969	0.96	0.969	0.967	0	0.943	0	1.40126e+06	1.35584e+06	1.3449e+06	786345	1.15126e+06	78727.6
evm.model.Chr2.273_S98	APSPRSERPISPRDRMPPRPP	evm.model.Chr2.273	SERPIsPR	0.972	0.934	0.947	0.939	0.965	0.972	0.929	1.96048e+06	2009204	1.88841e+06	2.23344e+06	2.16487e+06	2.08828e+06
evm.model.Chr2.273_T400	LDQIKITVMNTPKESGVDIKE	evm.model.Chr2.273	ITVMNtPK	0.973	0.969	0.954	0	0.973	0.972	0.957	16598.4	16979.1	0	32144.2	0	25483.3
evm.model.Chr2.273_T65	RSAPPRGHSPTRPPSPDHKRS	evm.model.Chr2.273	GHSPtRPPSPDHK;GHSPtRPPsPDHK	0.955	0.498	0	0	0	0.955	0.903	129911	148934	0	57553.5	447391	56030.2
evm.model.Chr2.280_S16	SEYDRGVNTFSPEGRLFQVEY	evm.model.Chr2.280	GVNTFsPEGR	0.972	0.946	0.969	0.968	0.972	0.944	0.972	93258.9	98155.2	62212.2	113656	75567.4	136482
evm.model.Chr2.280_S56	VVLAVEKRITSPLIEPSSIEK	evm.model.Chr2.280	ITsPLIEPSSIEK	0.971	0.966	0.968	0.966	0.963	0.971	0.969	227880	157049	290636	47119.8	74824.2	133684
evm.model.Chr2.285_T126	SEPSEKVKAETPENDIEKSKT	evm.model.Chr2.285	AEtPENDIEK;VKAEtPENDIEK	1	1	1	1	1	1	1	107175	112600	104146	50259.7	62621.9	87289.2
evm.model.Chr2.292_S205	ERMKEEEDIYSAKSEILDVDD	evm.model.Chr2.292	MKEEEDIYsAK	0.95	0	0.95	0.95	0	0	0	17235.9	15067.2	12044	0	0	0
evm.model.Chr2.292_T147	QKDAPKKPRRTRGALMKNIDA	evm.model.Chr2.292	tRGALMK	1	0	0	1	0	0	0	68497.6	65852.6	54296.3	0	33908	0
evm.model.Chr2.296_S586	LDEGGRAFRASDSGVELDVKV	evm.model.Chr2.296	AsDSGVELDVK	0.971	0.968	0.944	0.965	0.965	0.969	0.971	110361	127966	121427	125375	135595	135059
evm.model.Chr2.298_T108	IRKPSIASPATPKSVGKPDRP	evm.model.Chr2.298	KPSIASPAtPK	0.967	0.924	0.925	0.924	0.956	0.967	0	72185	69180.4	56206.1	79693.8	83462.4	0
evm.model.Chr2.301_S113	GADLKERRTMSESEVGPFVGR	evm.model.Chr2.301	TMsESEVGPFVGR	0.966	0.95	0.966	0.961	0	0.954	0.961	88214.2	40251.1	121182	0	77781.7	95134.2
evm.model.Chr2.301_S115	DLKERRTMSESEVGPFVGRLR	evm.model.Chr2.301	TMSEsEVGPFVGR	0.967	0.961	0.964	0.967	0	0	0	47486.3	45991.6	60800.4	0	0	27767.5
evm.model.Chr2.312_S34	KKAISKRPKQSDETENLPEKK	evm.model.Chr2.312	QsDETENLPEK;QsDETENLPEKK	0.972	0.969	0.97	0.967	0.966	0.972	0.971	229999	225997	185998	187657	204919	164456
evm.model.Chr2.312_S543	PNVGKALVKGSPDPLDSAFRL	evm.model.Chr2.312	GsPDPLDSAFR	0.961	0	0	0.961	0	0	0	0	0	6550.46	0	0	0
evm.model.Chr2.312_S922	SIPKLSEELASPLRQLHEIAR	evm.model.Chr2.312	LSEELAsPLR	0.968	0	0.953	0	0	0	0.968	0	20997	27048.7	0	0	0
evm.model.Chr2.313_S218	RFTAHRRRTPSPHRDRYRRSP	evm.model.Chr2.313	RRtPsPHR	1	0	1	1	1	1	0	107754	170362	41325.5	75461.2	71703.9	55895.6
evm.model.Chr2.313_S246	RSRSPRRRRRSRTPPRRHRSR	evm.model.Chr2.313	sRtPPRR	1	1	0	0	0	0	1	96445.1	0	128503	151050	194425	127299
evm.model.Chr2.313_T216	HDRFTAHRRRTPSPHRDRYRR	evm.model.Chr2.313	RRtPsPHR	1	0	1	1	1	1	0	107754	170362	41325.5	75461.2	71703.9	55895.6
evm.model.Chr2.313_T248	RSPRRRRRSRTPPRRHRSRER	evm.model.Chr2.313	SRtPPRR;sRtPPRR	1	1	0	0	0.948	0.938	1	124335	30224.6	151422	167997	216953	127299
evm.model.Chr2.317_evm.model.Chr2.316_T8	***MALPKRITKETQRLLSEP	evm.model.Chr2.317_evm.model.Chr2.316	MALPKRItK	1	1	0	0	0	0	0	22902.4	0	0	0	0	0
evm.model.Chr2.320_S16	ASGPQLTAGESGGKGQGAGAT	evm.model.Chr2.320	PLSYASGPQLTAGEsGGK	0.947	0.947	0	0	0	0	0	6670.48	11583.7	0	0	0	0
evm.model.Chr2.320_S4	*******MPLSYASGPQLTAG	evm.model.Chr2.320	PLsyAsGPQLTAGESGGK	0.922	0	0	0.922	0	0	0	0	0	106056	0	0	0
evm.model.Chr2.320_S678	TEKDKVESAQSDTDKVEADKK	evm.model.Chr2.320	VESAQsDTDKVEADKK	0.953	0.953	0.942	0.948	0	0	0	21929.7	24889.5	28266.4	0	0	0
evm.model.Chr2.320_S7	****MPLSYASGPQLTAGESG	evm.model.Chr2.320	PLsyAsGPQLTAGESGGK	0.922	0	0	0.922	0	0	0	0	0	106056	0	0	0
evm.model.Chr2.320_S888	TKYSETGESTSDEENPENGLN	evm.model.Chr2.320	YSETGESTsDEENPENGLNEK	0.954	0	0	0.954	0	0.918	0.932	264013	0	305688	0	174493	182400
evm.model.Chr2.320_T680	KDKVESAQSDTDKVEADKKKA	evm.model.Chr2.320	DKVESAQSDtDKVEADK	0.947	0.947	0	0	0	0	0	32632.7	0	0	0	0	0
evm.model.Chr2.320_T887	STKYSETGESTSDEENPENGL	evm.model.Chr2.320	YSETGEStSDEENPENGLNEK	0.942	0.488	0	0.483	0.942	0	0	265446	259501	49292.6	83930.8	0	0
evm.model.Chr2.320_Y5	******MPLSYASGPQLTAGE	evm.model.Chr2.320	PLsyAsGPQLTAGESGGK	0.922	0	0	0.922	0	0	0	0	0	106056	0	0	0
evm.model.Chr2.322.1_S11	MREYKLVVLGSGGVGKSALTV	evm.model.Chr2.322.1	LVVLGsGGVGK	1	1	1	1	1	1	1	25868.2	23587.1	28980.2	25398.6	22790.3	30345.2
evm.model.Chr2.340_S160	ILNRGKTSGRSDDNVESLHKR	evm.model.Chr2.340	TSGRsDDNVESLHK	0.958	0	0	0.958	0	0	0	0	0	10278.3	0	0	0
evm.model.Chr2.343_S359	VTIIGYTDIPSRLPTQSSNLY	evm.model.Chr2.343	HGGVtIIGYTDIPsR	0.924	0.924	0	0	0	0	0	184749	188397	208698	0	0	0
evm.model.Chr2.343_T350	PGELYKHGGVTIIGYTDIPSR	evm.model.Chr2.343	HGGVtIIGYTDIPsR	0.925	0.925	0	0	0	0	0	184749	188397	208698	0	0	0
evm.model.Chr2.34_S23	FEEDRDVDVDSDGEDRNGGSG	evm.model.Chr2.34	DVDVDsDGEDR;SFEEDRDVDVDsDGEDR	1	0	1	0	0	0	0	954893	903053	1.00042e+06	0	526635	766582
evm.model.Chr2.357_T149	TLQERYDGVRTPDNQKHFGID	evm.model.Chr2.357	YDGVRtPDNQK	0.971	0.966	0	0.953	0	0.971	0	131121	124679	116409	81731.6	114973	94070.6
evm.model.Chr2.358_S424	KTGDGSRWVNSPHQYTRVVEK	evm.model.Chr2.358	WVNsPHQYTR	0.966	0.966	0	0.965	0	0	0	37530.5	29860.7	32264.9	21344.4	0	27315.3
evm.model.Chr2.358_S450	SASSSQNGDVSPRTKTKWKRK	evm.model.Chr2.358	VVEKPEENMSASSSQNGDVsPR;VVEKPEENMsASSSQNGDVsPR	0.972	0.969	0.97	0.968	0.972	0.97	0.972	548618	382103	613100	46243.1	108016	50890.2
evm.model.Chr2.358_S516	GPQSQLLHSVSPDRSAALKTD	evm.model.Chr2.358	ETNKPGPQSQLLHSVsPDR;KETNKPGPQSQLLHSVsPDR	0.954	0.954	0	0.858	0	0	0	109386	0	224550	0	0	0
evm.model.Chr2.358_S53	QKKRVSNILTSPYFKEELESA	evm.model.Chr2.358	VSNILTsPYFK	0.936	0	0	0.936	0	0	0	0	0	10519.6	0	0	0
evm.model.Chr2.358_S709	TRSGLLGNSPSPNQSAVRSDE	evm.model.Chr2.358	SGLLGNSPsPNQSAVR	0.969	0.959	0.964	0.495	0	0.961	0.969	38027.5	41952.3	45793.2	0	0	31705.3
evm.model.Chr2.358_S717	SPSPNQSAVRSDEDVIYRNTD	evm.model.Chr2.358	sDEDVIYR	0.973	0.97	0.971	0.969	0.973	0.973	0.971	72040.7	62742.5	70022.1	107706	95991.4	116706
evm.model.Chr2.358_S743	KKMEKKKKRSSLSFLKKKKQK	evm.model.Chr2.358	RSsLSFLK;SsLSFLK	0.963	0.963	0.95	0.949	0.944	0	0	270363	201766	255171	30266.3	34600.6	0
evm.model.Chr2.358_S745	MEKKKKRSSLSFLKKKKQKE*	evm.model.Chr2.358	SSLsFLK;SSLsFLKK	0.968	0.951	0.968	0.806	0.964	0	0.965	158689	165690	148728	127177	184059	167661
evm.model.Chr2.359_S12	SKSKFGSNNASGEEAIYRIPP	evm.model.Chr2.359	FGSNNAsGEEAIYR	0.965	0.79	0.965	0.963	0	0	0	23533.9	26735.9	24245.2	0	0	0
evm.model.Chr2.359_S8	***MSKSKFGSNNASGEEAIY	evm.model.Chr2.359	FGsNNASGEEAIYR	0.965	0	0	0.965	0	0	0	0	0	69106.7	27512.2	0	0
evm.model.Chr2.364_T15	RKRNPVKEQSTLPIHSAKKTK	evm.model.Chr2.364	EQStLPIHSAK	0.953	0.925	0.94	0	0.953	0	0	32478.3	33691.6	0	42976.6	0	36028.2
evm.model.Chr2.367_S169	AADVIDKEMGSDYDLSMEDDE	evm.model.Chr2.367	EMGsDYDLSMEDDEEIPVK	0.96	0.96	0.494	0.487	0	0	0	50312.9	32229.5	107093	0	0	0
evm.model.Chr2.367_S174	DKEMGSDYDLSMEDDEEIPVK	evm.model.Chr2.367	EMGSDYDLsMEDDEEIPVK	0.948	0	0	0.948	0	0	0	0	0	77346.4	0	0	0
evm.model.Chr2.367_T131	IQETHVEKFITPQPEEKAQRR	evm.model.Chr2.367	FItPQPEEK	1	1	1	0	1	1	1	26879.1	31360	42478	30137.9	47478.6	41369.6
evm.model.Chr2.398_S211	VTVQTITTSISPERLVPINQL	evm.model.Chr2.398	GVTVQTITTSIsPER	0.964	0	0	0.964	0	0	0	0	0	25367.4	0	0	0
evm.model.Chr2.409_S35	DGRGILAADESSGTMGKRLDM	evm.model.Chr2.409	GILAADEsSGTMGK	0.951	0.912	0	0	0.951	0	0	65016.3	1.90463e+06	1.80969e+06	1.77212e+06	1.86621e+06	1.96603e+06
evm.model.Chr2.409_S36	GRGILAADESSGTMGKRLDMI	evm.model.Chr2.409	GILAADESsGTMGK	0.914	0	0.914	0	0	0	0	0	15220.5	0	0	0	0
evm.model.Chr2.409_T38	GILAADESSGTMGKRLDMIQV	evm.model.Chr2.409	GILAADESSGtMGK	0.938	0	0.938	0.929	0	0	0	19139.5	24398.5	32728	30415.8	23521.9	14846.1
evm.model.Chr2.416_S198	EPIKREDEEESLNEVGYDDIG	evm.model.Chr2.416	EDEEEsLNEVGYDDIGGVR	0.966	0.966	0	0.878	0	0	0	26288.6	0	113367	0	0	0
evm.model.Chr2.416_S463	FRFAMAQSNPSALRETVVEVP	evm.model.Chr2.416	FAMAQSNPsALR	0.971	0.965	0.965	0	0.971	0.908	0.933	107739	103040	19626.3	89810.2	24002	30661.4
evm.model.Chr2.416_S750	FEEAMRFARRSVTDKDIRKYE	evm.model.Chr2.416	sVTDKDIR	0.953	0	0	0.953	0	0	0	0	0	22446.8	0	0	0
evm.model.Chr2.416_S776	LQQARGFGNFSFGRQSGPSAP	evm.model.Chr2.416	GFGNFsFGR	1	1	1	1	0	0	0	20910.1	13663.9	30490.9	0	0	0
evm.model.Chr2.423_S485	PFLHPDVNGNSPNGRGTPNNH	evm.model.Chr2.423	KPFLHPDVNGNsPNGR	1	1	1	1	0	0	0	8804.19	11340.2	14232	0	0	0
evm.model.Chr2.453_S119	GRETPPPGRLSRSRSRDLDDL	evm.model.Chr2.453	ETPPPGRLsR;VGREtPPPGRLsR	1	0.97	1	1	0	0.973	0.972	1.715e+06	1.42023e+06	1478505	1.12078e+06	966986	1.30092e+06
evm.model.Chr2.453_S123	PPPGRLSRSRSRDLDDLPLRR	evm.model.Chr2.453	sRDLDDLPLR	1	0	1	1	0	1	0	460270	429184	683576	0	260604	0
evm.model.Chr2.453_S1326	KPKLPEPAPLSPIANDEDDPQ	evm.model.Chr2.453	LPEPAPLsPIANDEDDPQVVATAR	0.935	0	0	0.935	0	0	0	0	0	73461.2	0	0	0
evm.model.Chr2.453_S142	RRSRSRDLDRSPDRHRYRSRS	evm.model.Chr2.453	DLDRsPDR	1	1	1	1	1	1	1	520130	405978	230286	847085	912288	753352
evm.model.Chr2.453_S152	SPDRHRYRSRSRDLDDSRRRH	evm.model.Chr2.453	sRDLDDSR	0.96	0.922	0.923	0.933	0.96	0.953	0.943	64902.2	62419.8	59116.7	103187	99204.9	79638
evm.model.Chr2.453_S166	DDSRRRHRSRSRDLDSRPRRN	evm.model.Chr2.453	sRDLDSRPR	0.802	0.802	0	0	0	0	0	113662	134661	123180	0	116508	0
evm.model.Chr2.453_S184	RRNKSRGYDVSRSRSRTPPRS	evm.model.Chr2.453	GYDVsRsR	0.971	0.957	0.968	0	0.971	0.971	0.971	147251	183151	177295	224910	232181	200383
evm.model.Chr2.453_S186	NKSRGYDVSRSRSRTPPRSRR	evm.model.Chr2.453	GYDVsRsR	0.971	0.957	0.968	0	0.971	0.971	0.971	147251	183151	177295	224910	232181	200383
evm.model.Chr2.453_S188	SRGYDVSRSRSRTPPRSRRER	evm.model.Chr2.453	SRsRtPPR	0.954	0	0	0	0	0.954	0	0	0	0	0	53727	28220.8
evm.model.Chr2.453_S212	RSPSRSSRRRSPSYASSSPSV	evm.model.Chr2.453	RsPSYASSSPSVHR;sPSYASSSPSVHR;sPSYASSsPSVHR;sPSYASsSPSVHR;sPSYAsSsPSVHR	0.97	0.967	0.966	0.967	0.97	0.97	0.968	1.42043e+06	1.46562e+06	1.2049e+06	1.09207e+06	838106	1.03097e+06
evm.model.Chr2.453_S217	SSRRRSPSYASSSPSVHRSRR	evm.model.Chr2.453	sPSYAsSsPSVHR	0.951	0	0.951	0.934	0	0	0	0	47474.6	96163.8	0	0	0
evm.model.Chr2.453_S218	SRRRSPSYASSSPSVHRSRRG	evm.model.Chr2.453	sPSYASsSPSVHR	0.822	0.555	0.789	0.822	0.577	0	0.452	110840	106939	100968	184138	0	103911
evm.model.Chr2.453_S219	RRRSPSYASSSPSVHRSRRGR	evm.model.Chr2.453	SPSYASSsPSVHR;sPSYASSsPSVHR;sPSYAsSsPSVHR	0.97	0.949	0.964	0.944	0	0.97	0.949	261401	281611	288545	230197	192039	207345
evm.model.Chr2.453_S230	PSVHRSRRGRSRSKSPPRRRR	evm.model.Chr2.453	sRsKsPPR	1	0	0	0	0	1	0	0	0	0	0	51348.4	0
evm.model.Chr2.453_S232	VHRSRRGRSRSKSPPRRRRGR	evm.model.Chr2.453	sRsKsPPR	1	0	0	0	0	1	0	0	0	0	0	51348.4	0
evm.model.Chr2.453_S234	RSRRGRSRSKSPPRRRRGRSR	evm.model.Chr2.453	sRsKsPPR	1	0	0	0	0	1	0	0	0	0	0	51348.4	0
evm.model.Chr2.453_S277	HKPMEDLRSASPLSPDPDSAA	evm.model.Chr2.453	SAsPLSPDPDSAASDGDMMVFPVK	0.961	0	0	0.961	0	0	0	246354	139067	840565	0	11758.5	0
evm.model.Chr2.453_S288	PLSPDPDSAASDGDMMVFPVK	evm.model.Chr2.453	SASPLSPDPDSAAsDGDMMVFPVK	0.777	0	0	0.777	0	0	0	0	0	22652.2	0	0	0
evm.model.Chr2.453_S315	VVLKKTRWNNSYGLKLGTRIF	evm.model.Chr2.453	WNNsYGLK	0.959	0.957	0.953	0	0.959	0	0	37803.1	37322.7	34268.4	16245.1	45579.9	38091.3
evm.model.Chr2.453_S387	LVKKQDGGTVSIPAERFRAPA	evm.model.Chr2.453	KQDGGTVsIPAER;QDGGTVsIPAER	0.968	0.96	0.965	0.961	0.913	0	0.968	139928	129568	125960	132442	0	122300
evm.model.Chr2.453_S434	RSRHSSISKESESAGSPVVPV	evm.model.Chr2.453	EsESAGSPVVPVEVK	0.933	0.489	0.494	0.493	0.933	0.911	0.494	43782.8	36266.8	27364.2	19694.6	30066.2	37214.2
evm.model.Chr2.453_S436	RHSSISKESESAGSPVVPVEV	evm.model.Chr2.453	ESEsAGSPVVPVEVK	0.962	0.962	0.962	0.959	0	0	0	32259.4	26978.6	27328.2	0	0	0
evm.model.Chr2.453_S439	SISKESESAGSPVVPVEVKEA	evm.model.Chr2.453	ESESAGsPVVPVEVK	0.973	0.967	0.97	0.968	0.973	0.973	0.972	338390	370970	372510	267133	337592	397873
evm.model.Chr2.453_S491	HSSSDSESSRSTPEPAPRTKS	evm.model.Chr2.453	sTPEPAPR	0.958	0.5	0	0.958	0	0	0	39324.4	0	70366.8	0	0	127357
evm.model.Chr2.453_S724	PRSDAPVSGTSSNMFPAYERV	evm.model.Chr2.453	SDAPVSGTsSNMFPAYER	0.925	0.925	0	0	0	0	0	23730.5	13935.7	39717.5	0	0	0
evm.model.Chr2.453_S950	VGSEMLNSRISDDEEEELPKS	evm.model.Chr2.453	IsDDEEEELPK	1	1	1	1	1	1	1	6212764	6274339	6017736	5.94945e+06	6431098	6.62114e+06
evm.model.Chr2.453_S967	LPKSAPPPVESSSDEEQGNKF	evm.model.Chr2.453	SAPPPVEsSSDEEQGNK	0.945	0.801	0	0	0	0.945	0	97803.6	0	0	0	64312.9	0
evm.model.Chr2.453_S968	PKSAPPPVESSSDEEQGNKFG	evm.model.Chr2.453	SAPPPVESssDEEQGNK	0.952	0	0.952	0	0	0	0	0	25313.8	0	0	0	0
evm.model.Chr2.453_S969	KSAPPPVESSSDEEQGNKFGD	evm.model.Chr2.453	SAPPPVESSsDEEQGNK;SAPPPVESssDEEQGNK	0.958	0	0.952	0	0	0	0.958	0	25313.8	76208.9	0	0	78652.1
evm.model.Chr2.453_T112	RKVLVRVGRETPPPGRLSRSR	evm.model.Chr2.453	VGREtPPPGR;VGREtPPPGRLsR	1	1	1	1	1	1	1	3.50413e+06	3285303	3.39701e+06	2924684	2.91094e+06	2.62306e+06
evm.model.Chr2.453_T190	GYDVSRSRSRTPPRSRRERSY	evm.model.Chr2.453	SRsRtPPR	0.941	0	0	0	0	0.941	0	0	0	0	0	53727	28220.8
evm.model.Chr2.453_T791	SNRKGVIRLNTIKDIIEKDKH	evm.model.Chr2.453	LNtIKDIIEK	1	0	0	1	0	0	0	0	0	14377.5	0	0	0
evm.model.Chr2.453_T807	EKDKHAVLDITPTAVQKLNYA	evm.model.Chr2.453	HAVLDItPTAVQK	0.958	0	0.958	0.953	0	0	0	0	17525.4	27807.2	0	0	0
evm.model.Chr2.453_Y1148	QPPPARQEPVYAQVNKNRPTA	evm.model.Chr2.453	QEPVyAQVNK	1	1	1	0	1	1	1	38150.1	38627.4	34568.4	51592.9	59654.9	48779.8
evm.model.Chr2.459_S5	******MPYGSGSEEEQSRKL	evm.model.Chr2.459	PYGsGSEEEQSR;PYGsGSEEEQSRK;PYGsGsEEEQSR	0.972	0.969	0.968	0.958	0.972	0.971	0.969	319480	218962	286790	237176	246473	195257
evm.model.Chr2.459_S7	****MPYGSGSEEEQSRKLFV	evm.model.Chr2.459	PYGSGsEEEQSR;PYGsGsEEEQSR	0.963	0.959	0	0.963	0	0	0.954	88380.9	62453.4	98909.6	60455.2	88590.8	57121.4
evm.model.Chr2.470_S144	VARANLSKAQSEFSSAATEVA	evm.model.Chr2.470	AQsEFSSAATEVAK	0.968	0.967	0.968	0.964	0	0	0	18766.9	20314.4	12195.6	0	16142.2	0
evm.model.Chr2.470_S148	NLSKAQSEFSSAATEVAKVEA	evm.model.Chr2.470	AQSEFSsAATEVAK	0.944	0	0.944	0	0	0	0	31424.4	35006.6	30223.2	0	0	0
evm.model.Chr2.497_S1051	GSLTGSSDANSPASKVRIIGD	evm.model.Chr2.497	LVGSLTGSSDANsPASK	0.97	0.961	0.96	0.962	0.968	0.97	0.96	1382427	67530.1	1.39283e+06	1.098e+06	1.18353e+06	1.24101e+06
evm.model.Chr2.497_S3	********MSSPQQSDSEQLE	evm.model.Chr2.497	SsPQQSDSEQLER	0.971	0.968	0.968	0.966	0.969	0.971	0	300089	293531	266970	262429	211792	238028
evm.model.Chr2.504_S249	NENKKPATDGSPQKKKKAAVE	evm.model.Chr2.504	KPATDGsPQK;KPATDGsPQKK	0.97	0.948	0.969	0.967	0.969	0.97	0.968	94149.7	98394.9	171940	164062	158257	56537.8
evm.model.Chr2.504_T265	KAAVEADQPKTPLQQKENKAP	evm.model.Chr2.504	AAVEADQPKtPLQQK;KAAVEADQPKtPLQQK	1	1	1	1	1	1	1	923420	1.03235e+06	1.04184e+06	679535	762720	785068
evm.model.Chr2.524_S650	EYEQSYDQFYSPTSEKRREMS	evm.model.Chr2.524	MEYEQSYDQFYsPTSEK	0.963	0.951	0.326	0.963	0	0	0	49390.7	12496.7	84687.4	0	0	0
evm.model.Chr2.524_S660	SPTSEKRREMSPEEISKKREQ	evm.model.Chr2.524	EMsPEEISK;EMsPEEISKK;REMsPEEISK	0.973	0.97	0.971	0.969	0.972	0.973	0.972	3.10935e+06	3.40935e+06	3212828	3.56145e+06	3.24677e+06	4468131
evm.model.Chr2.524_S827	KHRETLKTTTSPTEPSTVEKP	evm.model.Chr2.524	TTTsPTEPSTVEK;TTTsPTEPSTVEKPK	0.97	0.962	0.97	0.967	0.961	0	0.966	3.08152e+06	2.72276e+06	2.54352e+06	2.18027e+06	2.27399e+06	2298479
evm.model.Chr2.524_S887	ANGVQQEGGDSPAAAGGKADD	evm.model.Chr2.524	LANGVQQEGGDsPAAAGGK	1	1	1	1	1	1	1	1.1103e+06	1.03644e+06	964642	677155	696119	702101
evm.model.Chr2.524_S950	KESKKSKQKQSEEEIPPPPPT	evm.model.Chr2.524	QKQsEEEIPPPPPTPQMSR	0.967	0.927	0	0.967	0	0	0	7904.82	0	27382.5	0	0	0
evm.model.Chr2.526_S70	EDQDPNNTTLSQPTVKPVILA	evm.model.Chr2.526	DSGEDQDPNNTTLsQPTVK	0.964	0.947	0.963	0.964	0	0	0.958	31918.9	35892.7	30568.8	0	0	13775.5
evm.model.Chr2.526_S9	**MDGGGNSGSQPYSVKGTVG	evm.model.Chr2.526	MDGGGNSGsQPYSVK	0.967	0.966	0.952	0.964	0.945	0.967	0.961	39715	41530.1	36571.4	28523.8	20643.9	29457.1
evm.model.Chr2.540_S1466	LSTSKKESGASSKPSTPSEQP	evm.model.Chr2.540	ESGAsSKPSTPSEQPLSEFK;ESGAsSKPStPSEQPLSEFK	0.957	0	0.957	0	0	0	0.485	143649	216170	278748	0	30985.6	37380.7
evm.model.Chr2.540_S1467	STSKKESGASSKPSTPSEQPL	evm.model.Chr2.540	ESGASsKPSTPSEQPLSEFK;ESGASsKPStPSEQPLSEFK;ESGASsKPsTPSEQPLSEFK	0.961	0.961	0	0.961	0.94	0.956	0.785	1.05621e+06	1.22295e+06	2155804	351707	1140403	659023
evm.model.Chr2.540_S1470	KKESGASSKPSTPSEQPLSEF	evm.model.Chr2.540	ESGASsKPsTPSEQPLSEFK	0.955	0	0	0	0	0.955	0	0	0	811497	0	441019	0
evm.model.Chr2.540_T1471	KESGASSKPSTPSEQPLSEFK	evm.model.Chr2.540	ESGASSKPStPSEQPLSEFK;ESGASsKPStPSEQPLSEFK;ESGAsSKPStPSEQPLSEFK;PStPSEQPLSEFK	0.962	0.804	0.962	0.962	0.934	0.764	0	1.75392e+06	1.62466e+06	1.1903e+06	340450	1.0926e+06	629153
evm.model.Chr2.540_T2309	PRNMRLPDPFTPNLKVDMLQE	evm.model.Chr2.540	LPDPFtPNLK	1	1	0	1	0	0	0	11348.9	0	44069.8	0	0	0
evm.model.Chr2.546_S555	VILNHESGSMS**********	evm.model.Chr2.546	SNLVILNHESGSMs	0.962	0	0	0.962	0	0	0	19732.5	0	19958.2	0	0	0
evm.model.Chr2.549_S1005	GGGSPPERRRSPPGRRGSPGR	evm.model.Chr2.549	RRsPPGR	1	1	1	1	1	1	1	609122	744618	750790	609414	257573	459297
evm.model.Chr2.549_S928	GRGDTRSARDSPSTNSPAPSQ	evm.model.Chr2.549	DsPSTNSPAPSQNAWR	0.966	0.612	0.855	0.885	0.966	0.962	0.966	44502.3	35495.9	43610.4	40342.3	46368.9	46826.9
evm.model.Chr2.549_S933	RSARDSPSTNSPAPSQNAWRP	evm.model.Chr2.549	DSPSTNsPAPSQNAWR	0.97	0.963	0.967	0.941	0.959	0.97	0.968	42573	40120.9	33372.6	41333.9	44869.3	39644
evm.model.Chr2.549_S965	RGATTPAPEGSWRRRRSPSPK	evm.model.Chr2.549	GATTPAPEGsWR	0.971	0.958	0.96	0	0.921	0.968	0.971	403952	392602	333120	493047	507135	547689
evm.model.Chr2.549_S984	PKRASPQGRRSPPPGRRVSPP	evm.model.Chr2.549	RsPPPGR	1	1	1	1	1	1	1	196659	150954	150072	463430	287640	520194
evm.model.Chr2.549_S992	RRSPPPGRRVSPPGGGSPPER	evm.model.Chr2.549	RVsPPGGGSPPER;RVsPPGGGsPPER;VsPPGGGSPPER;VsPPGGGsPPER	1	1	1	1	0	1	0	22000000	20100000	19300000	17400000	18200000	17800000
evm.model.Chr2.549_S998	GRRVSPPGGGSPPERRRSPPG	evm.model.Chr2.549	RVSPPGGGsPPER;RVsPPGGGsPPER;VSPPGGGsPPER;VSPPGGGsPPERR;VsPPGGGsPPER	1	1	1	1	0.971	1	0.971	26200000	26000000	23000000	23800000	24400000	24000000
evm.model.Chr2.549_T959	SDRPSPRGATTPAPEGSWRRR	evm.model.Chr2.549	GATtPAPEGSWR	0.96	0	0	0	0	0.96	0.56	0	0	0	0	48993.6	69332
evm.model.Chr2.552_S102	EDFAGGRLDDSGESLPRQSSS	evm.model.Chr2.552	LDDsGESLPR;LDDsGEsLPR	1	1	1	1	1	1	1	500136	499062	506207	593925	518583	645849
evm.model.Chr2.552_S105	AGGRLDDSGESLPRQSSSPYV	evm.model.Chr2.552	LDDSGEsLPR;LDDsGEsLPR	1	1	1	1	1	1	1	194219	209643	206443	171689	243608	243144
evm.model.Chr2.582_S380	SSEATKRTSYSPLAPAAAVKG	evm.model.Chr2.582	TSYsPLAPAAAVK	0.968	0.963	0.963	0.966	0.967	0.968	0.961	90642.1	90777.3	87877.2	93750.3	105618	135360
evm.model.Chr2.590_S111	YRKSILNLNESQKSDNDTYLN	evm.model.Chr2.590	SILNLNEsQK	0.972	0.957	0.956	0.951	0.96	0	0.972	22840.5	26136.1	31864.9	0	0	17920
evm.model.Chr2.596_S89	KRIKQHEERLSQIKPPTTK**	evm.model.Chr2.596	LsQIKPPTTK	0.971	0	0	0	0	0.971	0	0	0	39034	0	124773	0
evm.model.Chr2.596_T96	ERLSQIKPPTTK*********	evm.model.Chr2.596	LSQIKPPTtK	0.967	0	0	0.946	0.962	0	0.967	68151.6	59184.9	47414.8	70612.7	61560.2	95145.3
evm.model.Chr2.627_S555	GGPSYQEALASGQLDM*****	evm.model.Chr2.627	EGGPSYQEALAsGQLDM	0.965	0.955	0.965	0.956	0	0	0	20520.2	21822.8	62796.7	0	0	0
evm.model.Chr2.633_S63	GRGRGKDEEKSWTPVTKLGRL	evm.model.Chr2.633	DEEKsWTPVTK	0.966	0.966	0.962	0	0.954	0.964	0	57164.1	61902.6	59120.1	61689.9	59710.5	61098.1
evm.model.Chr2.642_S217	KIRLIEDGGGSRSRSRSRSRS	evm.model.Chr2.642	LIEDGGGsR;LIEDGGGsRsR	1	1	1	1	1	1	1	2256054	2.30835e+06	2.40145e+06	3544475	3.55596e+06	3.52813e+06
evm.model.Chr2.642_S219	RLIEDGGGSRSRSRSRSRSRS	evm.model.Chr2.642	LIEDGGGsRsR	1	1	1	1	1	1	1	2.16905e+06	2.23304e+06	2.29732e+06	3428459	3351941	3334508
evm.model.Chr2.643_S289	VEEAPSVFLDSKTREAMGQQA	evm.model.Chr2.643	VVEEAPSVFLDsK	0.962	0	0	0.962	0	0	0	0	0	16165	0	0	0
evm.model.Chr2.656_S420	GERKTIPDASSESPKAEGTSD	evm.model.Chr2.656	TIPDASsESPK	0.943	0	0.488	0.943	0	0	0	0	138415	142154	252645	258198	229235
evm.model.Chr2.673_S1025	AKEPNRPARLSSSESSSAASI	evm.model.Chr2.673	LsSSESSSAASITPK	0.963	0.959	0.92	0.963	0.816	0	0.501	153855	194264	174762	208452	162201	181581
evm.model.Chr2.673_S1026	KEPNRPARLSSSESSSAASIT	evm.model.Chr2.673	LSsSESSSAASITPK	0.966	0	0.938	0.8	0.9	0.966	0.903	124215	119314	101857	119052	102772	119627
evm.model.Chr2.673_S1210	FKLGLPVPEDSDVDDSHLPNP	evm.model.Chr2.673	LGLPVPEDsDVDDSHLPNPK	0.882	0	0	0.882	0	0	0	0	0	43154.2	0	0	0
evm.model.Chr2.673_S1497	TESTHHRKQNSIEIPTERSPP	evm.model.Chr2.673	KQNsIEIPTER;QNsIEIPTER	0.972	0.969	0.97	0.968	0.972	0.972	0.969	113276	136006	133425	82382.3	124921	130047
evm.model.Chr2.673_S1518	PPQRNTGGRQSPFSDVRVIKL	evm.model.Chr2.673	QsPFSDVR	0.973	0.97	0.971	0.966	0.973	0.973	0.967	209486	196923	199059	305369	262776	281578
evm.model.Chr2.673_S220	GGIPQAQGHLSAEGSQVSRSS	evm.model.Chr2.673	GGIPQAQGHLsAEGSQVSR	0.961	0.961	0	0.519	0	0	0	34196.2	21139.1	75026	0	0	0
evm.model.Chr2.673_S417	GTPGIYVKGVSPGSAADIDGR	evm.model.Chr2.673	GVsPGSAADIDGR	0.968	0	0.968	0	0	0	0	0	20886.2	12476.9	0	0	0
evm.model.Chr2.673_S42	ELDAMKSLMESPLFKKMVQLQ	evm.model.Chr2.673	SLMEsPLFK	0.972	0	0.971	0.968	0.971	0.972	0.972	85908.1	58655.3	102255	38828.6	58333.3	50884.2
evm.model.Chr2.673_S622	DNLTRNPARDSVVFEEKDGDF	evm.model.Chr2.673	NPARDsVVFEEK	1	1	1	1	1	1	1	147677	140071	121331	38111.1	164482	168404
evm.model.Chr2.673_T1853	KMPKLSLSSNTSEDVPMIKED	evm.model.Chr2.673	LSLSSNtSEDVPMIK	0.895	0	0	0.895	0	0	0	0	0	2913.62	0	0	0
evm.model.Chr2.705_S103	QIPSLALQKFSPSVDKPMSRR	evm.model.Chr2.705	FsPSVDKPMSR	0.973	0	0	0	0.973	0.972	0	219448	152219	178483	239146	273990	288822
evm.model.Chr2.705_S118	KPMSRRLRRASLSEIGFGKLE	evm.model.Chr2.705	AsLSEIGFGK;RAsLSEIGFGK	0.971	0.969	0.971	0.963	0.956	0.97	0.955	963128	798800	1.32131e+06	287327	132621	543461
evm.model.Chr2.705_S12	STIKKLKRRFSLSMRRSRSSL	evm.model.Chr2.705	RFsLSMR	0.964	0	0.964	0	0	0	0	132243	100570	260173	0	155796	62887.8
evm.model.Chr2.732_S428	PGIPGRASSASPVINRQSPVP	evm.model.Chr2.732	ASSAsPVINR	0.971	0	0.773	0.907	0.89	0.971	0.965	108006	82425.6	85713.4	229226	208091	184151
evm.model.Chr2.732_S435	SSASPVINRQSPVPGIIGKSD	evm.model.Chr2.732	ASSASPVINRQsPVPGIIGK;QsPVPGIIGK	1	1	1	1	1	1	1	1.68948e+06	1.61057e+06	1.72867e+06	2.05115e+06	2.01207e+06	2.1239e+06
evm.model.Chr2.745_S496	YNIVPTGHRNSIASVSVDMNS	evm.model.Chr2.745	NsIASVSVDMNSR	0.966	0.966	0	0	0	0.958	0	50741.8	0	0	0	56553.5	0
evm.model.Chr2.762_S10	*MSEHNEQKASDFEAQHEAAD	evm.model.Chr2.762	AsDFEAQHEAADPGK;SEHNEQKAsDFEAQHEAADPGK	1	1	1	1	1	1	1	331484	171327	349584	111520	212935	186204
evm.model.Chr2.762_S2	*********MSEHNEQKASDF	evm.model.Chr2.762	sEHNEQKASDFEAQHEAADPGK	0.891	0	0	0	0	0	0.891	0	0	0	0	0	65112.5
evm.model.Chr2.762_S31	PGKSESFGGNSAPGTPASRRS	evm.model.Chr2.762	SESFGGNsAPGTPASR;SESFGGNsAPGtPASR	0.972	0.963	0.967	0.968	0.963	0.972	0.967	167491	168501	125295	172225	157407	169252
evm.model.Chr2.762_S41	SAPGTPASRRSASHDVTKRYD	evm.model.Chr2.762	RsASHDVTK;sASHDVTK;sASHDVTKR	0.969	0.956	0.969	0.961	0.952	0.969	0.96	59624.9	63841.6	84175.6	232589	85873.4	93479.3
evm.model.Chr2.762_S52	ASHDVTKRYDSSDDDDLTKPS	evm.model.Chr2.762	RYDsSDDDDLTKPSDDVK;RYDssDDDDLTK;RYDssDDDDLTKPSDDVK;YDsSDDDDLTKPSDDVK;YDssDDDDLTKPSDDVK	0.966	0.962	0.966	0.965	0.961	0.962	0.965	6320656	10800000	13300000	1.48661e+06	3.56411e+06	4.46736e+06
evm.model.Chr2.762_S53	SHDVTKRYDSSDDDDLTKPSD	evm.model.Chr2.762	RYDSsDDDDLTKPSDDVK;RYDssDDDDLTK;RYDssDDDDLTKPSDDVK;RyDSsDDDDLTKPSDDVK;YDSsDDDDLTKPSDDVK;YDssDDDDLTKPSDDVK	0.966	0.962	0.966	0.965	0.95	0.963	0.962	6.06351e+06	10400000	12900000	1.13455e+06	3398629	3844964
evm.model.Chr2.762_S72	SDDVKVPIDESEMDNVELDSM	evm.model.Chr2.762	VPIDEsEMDNVELDSMK;VPIDEsEMDNVELDsMK;VPIDEsEMDNVELDsMKEVK	1	0	1	1	0	0	0	76588.5	77034.1	557585	36612.3	0	0
evm.model.Chr2.762_S81	ESEMDNVELDSMKEVKVEQPK	evm.model.Chr2.762	VPIDESEMDNVELDsMK;VPIDESEMDNVELDsMKEVK;VPIDEsEMDNVELDsMK;VPIDEsEMDNVELDsMKEVK	1	0.97	1	1	0.972	0.973	0.973	967812	858500	2.29728e+06	323941	417620	345635
evm.model.Chr2.762_T35	ESFGGNSAPGTPASRRSASHD	evm.model.Chr2.762	SESFGGNSAPGtPASR;SESFGGNsAPGtPASR	0.97	0.964	0.962	0.965	0.892	0.97	0.969	56553.9	52702.8	30673.1	36814.4	66169.8	68546
evm.model.Chr2.763_S102	LYKQETADSRSVVSAEHPLHK	evm.model.Chr2.763	sVVSAEHPLHK;sVVsAEHPLHK	1	1	1	1	1	1	1	204972	212128	205139	179664	198155	181957
evm.model.Chr2.763_S105	QETADSRSVVSAEHPLHKNPG	evm.model.Chr2.763	SVVsAEHPLHK;sVVsAEHPLHK	1	1	1	1	1	1	1	914811	925729	947205	436347	467677	439486
evm.model.Chr2.763_S131	DAEYKPLLPRSRNSSLWSVSS	evm.model.Chr2.763	sRNSSLWSVSSVGSR	0.867	0	0	0.867	0	0	0	77118.1	51090.2	103117	0	0	0
evm.model.Chr2.763_S134	YKPLLPRSRNSSLWSVSSVGS	evm.model.Chr2.763	NsSLWSVSSVGSR;NsSLWSVSsVGSR;SRNsSLWSVSsVGSR	0.956	0.594	0.956	0.953	0	0.943	0.754	183620	101339	241511	0	78683.5	101078
evm.model.Chr2.763_S138	LPRSRNSSLWSVSSVGSRISS	evm.model.Chr2.763	NSSLWsVSSVGSR;NSSLWsVSsVGSR;NSSLWsVsSVGSR	0.967	0.966	0.963	0.967	0.77	0.927	0.946	284431	362595	612412	54296.6	75576.8	131318
evm.model.Chr2.763_S140	RSRNSSLWSVSSVGSRISSNK	evm.model.Chr2.763	NSSLWSVsSVGSR;NSSLWsVsSVGSR	0.956	0.769	0.949	0.956	0	0	0.487	42256.7	32799.4	64801.9	0	0	17491.5
evm.model.Chr2.763_S141	SRNSSLWSVSSVGSRISSNKR	evm.model.Chr2.763	NSSLWSVSsVGSR;NSSLWSVSsVGsR;NSSLWsVSsVGSR;NsSLWSVSsVGSR;SRNSSLWSVSsVGSR;SRNsSLWSVSsVGSR	0.968	0.965	0.962	0.968	0.591	0.944	0.946	1.17033e+06	1.01256e+06	1.71347e+06	347845	521308	651702
evm.model.Chr2.763_S144	SSLWSVSSVGSRISSNKRCSR	evm.model.Chr2.763	NSSLWSVSSVGsR;NSSLWSVSsVGsR	0.953	0.94	0.953	0.952	0	0	0	54286.7	50528.2	77391.5	0	8741.79	6249.24
evm.model.Chr2.763_S196	EGSKPPSRDPSPTNEKPEKPK	evm.model.Chr2.763	DPsPTNEKPEK;DPsPTNEKPEKPK	0.972	0.969	0.969	0.968	0.972	0.972	0.97	430780	305870	359758	253258	296809	257745
evm.model.Chr2.763_S43	MADELLQELRSAEAFVMEGEN	evm.model.Chr2.763	sAEAFVMEGENEK	1	1	1	1	1	1	1	87846.6	85967.7	96638.8	46093.1	70831.7	72207
evm.model.Chr2.763_S88	EAGNIGREFASDGGLYKQETA	evm.model.Chr2.763	EFAsDGGLYK	0.974	0.97	0.971	0.969	0.974	0.973	0.973	244323	273487	382576	281023	301031	307302
evm.model.Chr2.765_S252	DCSLEYQKGESQTDMELSKDT	evm.model.Chr2.765	GEsQTDMELSK	0.952	0.952	0	0	0	0	0	66078.7	55408.8	47610.3	72815.9	56619.7	65895.4
evm.model.Chr2.769_S14	VSRDISIVDESMNEAEGKTYD	evm.model.Chr2.769	DISIVDEsMNEAEGK	0.973	0.969	0.97	0.967	0.972	0.964	0.973	87993.4	84335.4	109784	34114	40282.4	64925.3
evm.model.Chr2.778_S1022	EEIKDHSDSKSDISSEVTSPT	evm.model.Chr2.778	DHSDSKsDISSEVTSPTMPSK;sDISSEVTSPTMPSK	0.932	0	0.327	0.801	0	0.932	0	10449.2	175552	36750.8	0	38648.1	0
evm.model.Chr2.778_S1025	KDHSDSKSDISSEVTSPTMPS	evm.model.Chr2.778	SDIsSEVTSPTMPSK;SDIsSEVTsPTMPSK	0.959	0.58	0.959	0.76	0	0	0	116472	130259	164585	0	0	46012.6
evm.model.Chr2.778_S1026	DHSDSKSDISSEVTSPTMPSK	evm.model.Chr2.778	SDISsEVTSPTMPSK;SDISsEVTsPTMPSK	0.965	0	0.954	0.958	0	0.965	0.95	0	24917.5	133135	0	24567.2	0
evm.model.Chr2.778_S1030	SKSDISSEVTSPTMPSKSIVF	evm.model.Chr2.778	SDISSEVTsPTMPSK;SDISsEVTsPTMPSK;SDIsSEVTsPTMPSK	0.972	0.968	0.968	0.963	0.972	0.971	0.972	970416	885786	1.06458e+06	546346	791036	864823
evm.model.Chr2.778_S1145	PRTSSSVTPVSPKRKFTIKPF	evm.model.Chr2.778	TSSSVTPVsPK	0.972	0.963	0.967	0.965	0.972	0.971	0.97	1.28618e+06	1.21729e+06	1.06631e+06	1749614	1.75825e+06	2.14446e+06
evm.model.Chr2.778_S1292	VSHVTVTRQKSGPSFEVVSSK	evm.model.Chr2.778	QKsGPSFEVVSSK;sGPSFEVVSSK	0.973	0.969	0.97	0.968	0.971	0.973	0.968	570392	536303	560918	650479	615945	615278
evm.model.Chr2.778_S1358	TKQQVEPPPTSPRKISPVLTN	evm.model.Chr2.778	QQVEPPPTsPR	0.957	0.957	0.602	0	0	0.95	0	401755	277462	0	501158	409228	473376
evm.model.Chr2.778_S1363	EPPPTSPRKISPVLTNGESTA	evm.model.Chr2.778	KIsPVLTNGESTAVK	0.954	0	0	0.954	0	0	0	0	7141.97	10239.2	0	0	0
evm.model.Chr2.778_S1381	STAVKKPARLSYDSDDVTTKK	evm.model.Chr2.778	LsYDSDDVTTK	0.97	0.965	0	0	0	0.97	0	66989.9	67879.2	65539.7	0	99160.4	104932
evm.model.Chr2.778_S1384	VKKPARLSYDSDDVTTKKIVN	evm.model.Chr2.778	LSYDsDDVTTK	0.97	0.963	0.967	0.96	0.969	0.97	0.969	61490.2	58400.3	52246.7	53885.8	53951.6	61549.3
evm.model.Chr2.778_S500	VSGSVRSKRGSVDSNVTEEVS	evm.model.Chr2.778	GsVDSNVTEEVSEVESR;RGsVDsNVTEEVSEVESR	0.965	0	0	0.965	0	0	0	0	0	70184.9	0	0	0
evm.model.Chr2.778_S503	SVRSKRGSVDSNVTEEVSEVE	evm.model.Chr2.778	RGsVDsNVTEEVSEVESR	0.891	0	0	0.891	0	0	0	0	0	42736.2	0	0	0
evm.model.Chr2.778_S518	EVSEVESRAESIGLDAIRDES	evm.model.Chr2.778	AEsIGLDAIR	1	1	1	1	1	1	1	49623.7	72835.1	79060.5	31548.9	49939.6	51352.5
evm.model.Chr2.778_S883	NASPSPRRTNSFTVTPAAAYR	evm.model.Chr2.778	TNsFTVTPAAAYR	0.967	0.531	0.967	0.967	0.942	0.814	0.962	181181	179472	198309	129306	166337	246407
evm.model.Chr2.778_S900	AAYRSSSVPKSPMRDPVSPSY	evm.model.Chr2.778	sPMRDPVSPSYVK;sPMRDPVsPSYVK	0.957	0	0.957	0.95	0	0	0	70680.8	72086.1	96786.1	30520.4	29372.8	30645.7
evm.model.Chr2.778_S907	VPKSPMRDPVSPSYVKTEAER	evm.model.Chr2.778	DPVsPSYVK;SPMRDPVsPSYVK;sPMRDPVsPSYVK	0.972	0.969	0.964	0.966	0.972	0.971	0.955	335285	259121	353833	212240	305361	327494
evm.model.Chr2.778_S921	VKTEAERLPTSPTAVPVNSPR	evm.model.Chr2.778	LPTsPTAVPVNSPR	0.963	0.94	0.959	0.958	0.963	0.94	0.962	2257478	2359782	2.56144e+06	1.50224e+06	2.1501e+06	2.51842e+06
evm.model.Chr2.778_S929	PTSPTAVPVNSPRYSRIIPGE	evm.model.Chr2.778	LPTSPTAVPVNsPR	0.937	0.843	0.775	0.861	0.927	0.9	0.937	128002	139781	193736	41002.5	185584	159830
evm.model.Chr2.778_S972	DSDIDRLSVTSQSDSLSGNTK	evm.model.Chr2.778	LSVTsQSDSLSGNTK;LSVTsQSDsLSGNTK	0.967	0.936	0.965	0.956	0.953	0.967	0.967	302272	288810	286101	230908	290815	276982
evm.model.Chr2.778_S976	DRLSVTSQSDSLSGNTKFHTD	evm.model.Chr2.778	LSVTSQSDsLSGNTK;LSVTsQSDsLSGNTK	0.967	0.961	0.964	0.96	0.957	0.959	0.967	523494	503259	470592	379457	406659	430750
evm.model.Chr2.779_S922	YNGSYYMEKASENGASYPAAP	evm.model.Chr2.779	AsENGASYPAAPSTDER	0.96	0.96	0.941	0.954	0.96	0.957	0.956	0	77218.2	115028	14295.2	23693.6	60364.3
evm.model.Chr2.779_S933	ENGASYPAAPSTDERFALRVD	evm.model.Chr2.779	ASENGASYPAAPsTDER	0.941	0.491	0.941	0.49	0.491	0	0.487	45102.4	21366.3	21177.9	0	0	18858.5
evm.model.Chr2.782_S116	QKVESRPAYQSSDRDAYRHAP	evm.model.Chr2.782	PAYQsSDR;PAYQsSDRDAYR	0.947	0	0.942	0	0.947	0.486	0	0	104424	90767.8	88174.1	61818.7	0
evm.model.Chr2.782_S117	KVESRPAYQSSDRDAYRHAPQ	evm.model.Chr2.782	PAYQSsDRDAYR	0.937	0.937	0	0.925	0	0	0.837	94924	97947.8	90767.8	0	70948.4	65456.2
evm.model.Chr2.782_T140	GDKKAEAGAGTGGFDFRGGYG	evm.model.Chr2.782	AEAGAGtGGFDFR	1	1	0	1	0	0	0	22089.3	21171.5	17497.3	0	0	0
evm.model.Chr2.786_S1093	PAFKFSSKPGSPITPDDPTPT	evm.model.Chr2.786	FSSKPGsPITPDDPTPTR;FSSKPGsPItPDDPTPTR;PGsPITPDDPTPTR;PGsPItPDDPTPTR	0.972	0.969	0.97	0.968	0.972	0.972	0.97	458692	447239	436238	185851	307867	300923
evm.model.Chr2.786_S1181	SSNSSRSKRFSGDKEPQSKEH	evm.model.Chr2.786	FsGDKEPQSK;RFsGDKEPQSK	0.971	0.939	0.894	0.91	0.971	0.971	0	163399	165751	163642	97510.1	103655	78347.7
evm.model.Chr2.786_S1314	PSKSLNQHSLSPGKRQLTGVK	evm.model.Chr2.786	SLNQHSLsPGK;SLNQHSLsPGKR	0.964	0	0.947	0.964	0	0	0	52957.9	103337	65535.8	0	0	0
evm.model.Chr2.786_S1529	AIIANQQKNKSPPANQNPEKN	evm.model.Chr2.786	NKsPPANQNPEK	1	1	1	1	1	1	1	201733	225876	193760	174585	122057	131482
evm.model.Chr2.786_S1544	QNPEKNEKQSSPVTSQHNHSP	evm.model.Chr2.786	QSsPVTSQHNHSPVTVR;QSsPVTSQHNHsPVTVR	0.965	0.943	0.962	0.964	0	0.965	0.893	283916	250389	283001	0	161526	134383
evm.model.Chr2.786_S1553	SSPVTSQHNHSPVTVRKRRPL	evm.model.Chr2.786	QSSPVTSQHNHsPVTVR;QSsPVTSQHNHsPVTVR	0.964	0.634	0.819	0.964	0.769	0.958	0.884	517930	474000	470918	145938	306426	240398
evm.model.Chr2.786_S459	VGERAERTIGSPTLHTSPTKK	evm.model.Chr2.786	TIGsPTLHTSPTK;TIGsPTLHTsPTK	0.961	0.955	0.96	0.949	0.835	0.961	0.961	399170	385200	417241	375570	373305	392935
evm.model.Chr2.786_S465	RTIGSPTLHTSPTKKQFSPAG	evm.model.Chr2.786	TIGSPTLHTsPTK;TIGsPTLHTsPTK	0.967	0.927	0.965	0.93	0.967	0	0	293385	271026	330172	304613	59255.3	348808
evm.model.Chr2.786_S472	LHTSPTKKQFSPAGKTPSLSP	evm.model.Chr2.786	KQFsPAGK	1	0	0	1	0	0	0	0	0	10838.1	0	0	0
evm.model.Chr2.786_S481	FSPAGKTPSLSPRRRSTPASY	evm.model.Chr2.786	TPSLsPR	0.954	0.954	0.926	0.91	0.9	0.876	0.878	231165	259999	265358	464574	278707	374660
evm.model.Chr2.786_S486	KTPSLSPRRRSTPASYLSSKF	evm.model.Chr2.786	sTPASYLSSK	0.971	0	0.489	0	0.971	0.49	0	264178	259469	231771	225488	322909	346360
evm.model.Chr2.786_T1055	RAIGDGDASATPRQPTLLNTN	evm.model.Chr2.786	AIGDGDASAtPR	0.967	0	0	0	0.961	0	0.967	0	0	0	16300.3	29524.1	10072.6
evm.model.Chr2.786_T1096	KFSSKPGSPITPDDPTPTRRL	evm.model.Chr2.786	FSSKPGSPItPDDPTPTR;FSSKPGsPItPDDPTPTR;PGSPItPDDPTPTR;PGsPItPDDPTPTR	0.972	0.969	0.97	0.968	0.972	0.971	0.97	321013	328524	324961	205333	232715	258075
evm.model.Chr2.786_T464	ERTIGSPTLHTSPTKKQFSPA	evm.model.Chr2.786	TIGSPTLHtSPTK	0.938	0	0	0	0	0.938	0	0	0	0	0	249143	0
evm.model.Chr2.786_T467	IGSPTLHTSPTKKQFSPAGKT	evm.model.Chr2.786	TIGSPTLHTSPtK	0.963	0	0	0	0	0	0.963	0	0	0	0	245801	281695
evm.model.Chr2.788.1_T500	SFRPVEPAQITPPLDNRPQGG	evm.model.Chr2.788.1	PVEPAQItPPLDNRPQGGTR	0.966	0	0	0.966	0	0	0	0	0	37780.7	0	0	0
evm.model.Chr2.801_S103	LKGVPQVEEASSESEGEGQQF	evm.model.Chr2.801	GVPQVEEAsSESEGEGQQFEK;GVPQVEEAsSEsEGEGQQFEK;GVPQVEEAssESEGEGQQFEK;GVPQVEEAssEsEGEGQQFEK	1	0.966	0.964	1	0.927	0.931	0.872	24300000	30900000	65100000	3562791	9052174	5975245
evm.model.Chr2.801_S104	KGVPQVEEASSESEGEGQQFE	evm.model.Chr2.801	GVPQVEEASsESEGEGQQFEK;GVPQVEEASsEsEGEGQQFEK;GVPQVEEAssESEGEGQQFEK;GVPQVEEAssEsEGEGQQFEK	1	0.966	0.964	1	0.927	0.931	0.651	15600000	20700000	47300000	1938884	4722259	331562
evm.model.Chr2.801_S106	VPQVEEASSESEGEGQQFEKT	evm.model.Chr2.801	GVPQVEEASSEsEGEGQQFEK;GVPQVEEASsEsEGEGQQFEK;GVPQVEEAsSEsEGEGQQFEK;GVPQVEEAssEsEGEGQQFEK	1	0.962	0.951	1	0.699	0.86	0.87	15900000	20500000	50100000	2.6423e+06	4325721	5276973
evm.model.Chr2.801_S161	GEEEEEKNEKSGEEKEEKSEE	evm.model.Chr2.801	EGEEEEEKNEKsGEEK;NEKsGEEKEEK	1	0	1	1	0	0	0	0	51646.8	35626.9	0	0	0
evm.model.Chr2.801_S233	DETKVEQKDTSTSDPNEASTS	evm.model.Chr2.801	DTsTSDPNEASTSSGVK	0.965	0.965	0.943	0.945	0.964	0.965	0.908	1.7387e+06	1.55299e+06	1.5189e+06	1156035	1259438	822861
evm.model.Chr2.801_S241	DTSTSDPNEASTSSGVKEGET	evm.model.Chr2.801	DTSTSDPNEAsTSSGVK;DTSTSDPNEAsTSsGVK	0.956	0.952	0.244	0.956	0.477	0.482	0.94	27010.8	64296.7	68828.4	29030.6	22401.2	30863.9
evm.model.Chr2.801_S244	TSDPNEASTSSGVKEGETTED	evm.model.Chr2.801	DTSTSDPNEASTSsGVK;DTSTSDPNEAsTSsGVK	0.97	0.963	0.88	0.966	0.966	0.97	0.967	474384	460440	451816	431622	357628	372223
evm.model.Chr2.801_S425	MKRQEGRLGGSPFTQGGSKRV	evm.model.Chr2.801	LGGsPFTQGGSK	0.929	0.419	0.783	0.838	0.648	0.929	0.624	2.68011e+06	5240711	4777385	7092159	6066872	6.85488e+06
evm.model.Chr2.801_S432	LGGSPFTQGGSKRVAEATTIE	evm.model.Chr2.801	LGGSPFTQGGsK;LGGSPFTQGGsKR	0.972	0.967	0.938	0.959	0.958	0.972	0.962	423745	405528	391345	437510	456106	483933
evm.model.Chr2.801_S465	DISHLVRRKRSSPEDESNGAP	evm.model.Chr2.801	KRssPEDESNGAPTDNGK;sSPEDESNGAPTDNGK	0.966	0.961	0.492	0.964	0.966	0.493	0.493	146477	137245	113403	62897.2	61901.7	81621.7
evm.model.Chr2.801_S466	ISHLVRRKRSSPEDESNGAPT	evm.model.Chr2.801	KRssPEDESNGAPTDNGK;SsPEDESNGAPTDNGK	0.964	0.914	0	0.964	0	0	0	112706	52524.1	37204.4	0	0	0
evm.model.Chr2.801_T137	LRNEVEAAMATEDEDTQDENE	evm.model.Chr2.801	NEVEAAMAtEDEDTQDENEK;NEVEAAMAtEDEDTQDENEKK;NEVEAAMAtEDEDtQDENEKK	1	1	0.97	0.969	0.972	0.972	0.972	2407180	2166998	2.72102e+06	954294	1.42682e+06	1.5359e+06
evm.model.Chr2.801_T142	EAAMATEDEDTQDENEKKEGE	evm.model.Chr2.801	NEVEAAMATEDEDtQDENEK;NEVEAAMATEDEDtQDENEKK;NEVEAAMAtEDEDtQDENEKK	1	1	0.966	0.962	0	0.96	0.955	554799	236720	280699	117793	308346	411941
evm.model.Chr2.802_S35	QNDQKSLISSSPETSKPKLVF	evm.model.Chr2.802	SLISSsPETSKPK	0.945	0.804	0.945	0.546	0.894	0.678	0.773	490004	437764	421277	394743	393926	448416
evm.model.Chr2.809_S12	ASKTQIKPKGSFAGLPQTTRA	evm.model.Chr2.809	GsFAGLPQTTR	0.939	0	0	0.939	0	0	0	0	0	16147.6	0	0	29133.6
evm.model.Chr2.828_S592	SLEKDIVTNVSPRIVRGTTSG	evm.model.Chr2.828	DIVTNVsPR	0.971	0.969	0.969	0.962	0.589	0.971	0.97	63820	52982.3	52292.4	88315.4	92631.6	98742.3
evm.model.Chr2.82_S2256	YFGGVRIQYLSEVAQNDRAQV	evm.model.Chr2.82	IQYLsEVAQNDR	0.933	0	0	0	0	0	0.933	138955	100831	272272	24250.3	36365.5	48610.7
evm.model.Chr2.82_T2282	PNTAPNAPGTTPPANLPRRHR	evm.model.Chr2.82	AQVGESNPPNTAPNAPGTtPPANLPR	0.953	0	0	0	0	0	0.953	716121	527024	1262890	0	0	160257
evm.model.Chr2.836_S390	TSDGVKLGHVSDDDVRGSDNE	evm.model.Chr2.836	LGHVsDDDVR	1	1	1	1	1	1	1	855289	772626	728877	955814	1.0276e+06	1.01646e+06
evm.model.Chr2.836_S397	GHVSDDDVRGSDNEETQAEIK	evm.model.Chr2.836	GsDNEETQAEIK	0.969	0.969	0.969	0.966	0.967	0.968	0.969	38586.1	45213.1	49600.9	51205.6	44590.1	44573.9
evm.model.Chr2.836_S709	HMPQSKRRRLSAGQSDGRKEE	evm.model.Chr2.836	LsAGQSDGR;RLsAGQSDGR;RLsAGQSDGRK	0.973	0.967	0.969	0.967	0.973	0.959	0.973	273539	378839	343754	484012	463024	441762
evm.model.Chr2.836_S760	YVIRPKWKIGSLETEDGERFN	evm.model.Chr2.836	IGsLETEDGER	0.972	0.962	0.967	0.968	0.972	0.956	0.971	22601.2	22136.4	17045	35626.2	26958.9	27712.6
evm.model.Chr2.844_S133	TEYRVIVENLSSRVAWQELKD	evm.model.Chr2.844	VIVENLsSR	0.922	0	0.5	0.5	0	0.5	0.922	41637.5	38543.6	18155.7	0	65585.6	62878.3
evm.model.Chr2.844_S299	PSHDDKSRENSPEKSPAHENG	evm.model.Chr2.844	ENsPEKsPAHENGDK;ENsPEKsPAHENGDKDNNAEMR	1	1	1	1	1	0	0	225813	317289	262308	16636.3	92342.9	41790.9
evm.model.Chr2.844_S303	DKSRENSPEKSPAHENGDKDN	evm.model.Chr2.844	ENsPEKsPAHENGDK;ENsPEKsPAHENGDKDNNAEMR	1	1	1	1	1	0	0	225813	317289	262308	16636.3	92342.9	41790.9
evm.model.Chr2.894_S33	SVIAHVDHGKSTLTDSLVSKA	evm.model.Chr2.894	sTLTDSLVSK	0.963	0	0.963	0.485	0	0.471	0.491	22630.5	21908.7	21271.3	0	27696.8	29344.7
evm.model.Chr2.894_S38	VDHGKSTLTDSLVSKAGIIAG	evm.model.Chr2.894	STLTDsLVSK	0.966	0.961	0.966	0.947	0.488	0.958	0.952	65644.7	45329.8	64945.7	78396.9	84373	98756.2
evm.model.Chr2.894_S41	GKSTLTDSLVSKAGIIAGSKA	evm.model.Chr2.894	STLTDSLVsK	0.965	0.961	0	0.948	0	0.965	0.836	25290.2	18111.4	19841.6	0	28361.2	21121
evm.model.Chr2.894_S484	HNMKQMKFSVSPVVRVAVEAK	evm.model.Chr2.894	FSVsPVVR	0.973	0.886	0.922	0.926	0.955	0.973	0.887	331606	367397	427427	232282	307934	357962
evm.model.Chr2.894_T36	AHVDHGKSTLTDSLVSKAGII	evm.model.Chr2.894	STLtDSLVSK	0.967	0.953	0.966	0.959	0.908	0.967	0.888	31149.4	38370.6	27336	0	39141.4	28789.7
evm.model.Chr2.894_T57	AGSKAGEARFTDTRKDEQERC	evm.model.Chr2.894	FtDTRKDEQER;FtDtRKDEQER	1	1	1	1	1	1	1	724610	188601	791285	754590	753850	95392
evm.model.Chr2.894_T59	SKAGEARFTDTRKDEQERCIT	evm.model.Chr2.894	FTDtRKDEQER;FtDtRKDEQER	1	1	1	1	1	1	1	652708	124709	744547	676554	724636	42965.9
evm.model.Chr2.941_S574	LFSLKYGDSGSPTPLSKDVEC	evm.model.Chr2.941	YGDSGsPTPLSK	0.964	0.954	0.964	0.947	0	0	0	22557.1	14330.5	17430.4	0	0	0
evm.model.Chr2.975_S34	DQEAVKGKFKSMDEIRSALGD	evm.model.Chr2.975	FKsMDEIR	1	0	1	1	1	0	0	0	20202.6	59662.7	28717	0	0
evm.model.Chr2.991_S11	MASQGNGPNQSPEPLGPPGAR	evm.model.Chr2.991	ASQGNGPNQsPEPLGPPGAR	0.971	0	0.971	0.968	0	0	0	374960	401865	382812	297739	342619	343374
evm.model.Chr2.993_S190	NQTENLDDPSSPAAVRHSQML	evm.model.Chr2.993	LNQTENLDDPSsPAAVR	0.969	0.965	0.945	0.957	0.964	0.969	0.968	317515	320885	363978	152553	243199	259855
evm.model.Chr2.996_S570	LTNATKSAYHSLTRSSTQASV	evm.model.Chr2.996	SAYHsLTR	0.891	0.891	0	0	0	0	0	24691.4	0	0	0	0	0
evm.model.Chr2.996_S631	RATRMAEDGQSEDNPTREAME	evm.model.Chr2.996	MAEDGQsEDNPTR	0.972	0.968	0.97	0.968	0.972	0.972	0.972	172624	152186	145820	145031	178811	162815
evm.model.Chr2.996_S697	RAPRLKNKSMSSGHLMAIAAK	evm.model.Chr2.996	SMsSGHLMAIAAK	0.969	0.965	0.969	0.966	0.963	0.96	0	809353	479574	878295	850198	850106	541361
evm.model.Chr2.996_S728	HGSMVMTSRRSIVDNNADAMS	evm.model.Chr2.996	RsIVDNNADAMSLK;sIVDNNADAMSLK	0.971	0.962	0.97	0	0	0.971	0	62254.9	57461	30317.9	0	34748.2	28896.8
evm.model.Chr2.996_S738	SIVDNNADAMSLKSDTDRTNL	evm.model.Chr2.996	SIVDNNADAMsLK;SIVDNNADAMsLKSDtDR;SIVDNNADAMsLKsDTDR	0.973	0.967	0.97	0.968	0.972	0.973	0.972	258091	277842	337963	154690	208436	244031
evm.model.Chr2.996_S741	DNNADAMSLKSDTDRTNLLES	evm.model.Chr2.996	SIVDNNADAMsLKsDTDR	0.96	0.628	0.953	0.629	0	0	0.96	81108.2	74706.5	127438	0	29758.6	36967.2
evm.model.Chr2.996_T743	NADAMSLKSDTDRTNLLES**	evm.model.Chr2.996	SIVDNNADAMsLKSDtDR	0.772	0	0	0.772	0	0	0	0	82932.8	87359.2	0	0	0
evm.model.Chr3.1001_S190	SSRNPAAAAASPRATSITTPQ	evm.model.Chr3.1001	NPAAAAAsPR	1	1	1	1	1	1	1	363642	387700	337578	491775	450430	461286
evm.model.Chr3.1001_S195	AAAAASPRATSITTPQRATET	evm.model.Chr3.1001	ATsITTPQR	0.967	0.966	0.964	0.812	0.963	0.702	0.967	71461.3	64347	56245.4	73737.9	66034.7	75673.1
evm.model.Chr3.1001_S296	TEQELRDTVRSPQLRQAISSF	evm.model.Chr3.1001	DTVRsPQLR	0.93	0.796	0.81	0.87	0.682	0.893	0.93	2.68211e+06	2.48777e+06	2355343	2.57973e+06	2.43389e+06	2.49328e+06
evm.model.Chr3.1001_S31	GKMFLKGTTVSPDKRKGQVYV	evm.model.Chr3.1001	GTTVsPDKR	0.956	0.777	0.894	0.915	0.93	0.925	0.956	129918	129759	123922	139363	157756	90287.4
evm.model.Chr3.1001_S352	KAMQEPEKKASAEDEEEEMSV	evm.model.Chr3.1001	AsAEDEEEEMSVD;KAsAEDEEEEMSVD	0.973	0.97	0.97	0.968	0.972	0.973	0.972	351036	316836	300437	222941	215378	241937
evm.model.Chr3.1001_S361	ASAEDEEEEMSVD********	evm.model.Chr3.1001	ASAEDEEEEMsVD	0.972	0.969	0.97	0.968	0.972	0.97	0.97	273187	299385	294858	105170	117773	142320
evm.model.Chr3.1001_S7	****MSLFGNSTGSSSKNLVE	evm.model.Chr3.1001	SLFGNsTGSSSK	0.961	0.482	0.947	0.961	0	0.941	0.901	40548.9	41290.5	38113.5	36438.7	37055.9	45285.1
evm.model.Chr3.1001_T198	AASPRATSITTPQRATETPAT	evm.model.Chr3.1001	ATSITtPQR	0.968	0.939	0.96	0.936	0.965	0.964	0.968	74029.4	54191.3	55589.6	87848	105118	105433
evm.model.Chr3.1003_S360	PVGKKQKKDGSFESTNGVGGK	evm.model.Chr3.1003	DGsFESTNGVGGK;KDGsFESTNGVGGK	0.973	0.968	0.97	0.962	0.973	0.973	0.972	196723	182644	186200	87778.2	174992	69759.9
evm.model.Chr3.1007_S148	YMFFKNFKPTSSQREKPEEEE	evm.model.Chr3.1007	NFKPTsSQR	0.791	0	0	0.791	0	0	0	0	0	85031.2	0	0	0
evm.model.Chr3.1007_S149	MFFKNFKPTSSQREKPEEEET	evm.model.Chr3.1007	NFKPTSsQR	0.967	0	0.692	0	0.967	0	0	0	83264.8	0	62724.5	119365	48229.1
evm.model.Chr3.1007_S180	PVKYIPPSMRSGGNTVGSSMP	evm.model.Chr3.1007	sGGNTVGSSMPSGR	0.964	0.958	0.939	0.964	0	0	0	23709.1	26377.6	14240.2	0	0	0
evm.model.Chr3.1008_S1162	SEKKKKPKLPSPPPLSDLAVH	evm.model.Chr3.1008	LPsPPPLSDLAVHEDTER	0.962	0	0	0.962	0	0	0	0	0	12727.3	0	0	0
evm.model.Chr3.1008_S1429	EELGSLGKKTSSGSLFERNKS	evm.model.Chr3.1008	KTsSGSLFER	0.942	0	0	0.942	0	0	0	0	0	8125.35	0	0	0
evm.model.Chr3.1008_S1452	PSLKFFMRKASEEEESMKEQE	evm.model.Chr3.1008	KAsEEEESMK	0.964	0	0	0.964	0	0	0	0	26273.6	23220.1	0	21351.9	0
evm.model.Chr3.1008_S1657	SILSMMGKKESTPPPLPDSTT	evm.model.Chr3.1008	EsTPPPLPDSTTK;KEsTPPPLPDSTTK	0.968	0.491	0.968	0.915	0.492	0.954	0.486	632284	775316	636638	462991	491085	202179
evm.model.Chr3.1008_S1669	PPPLPDSTTKSDVDEPPDDAK	evm.model.Chr3.1008	sDVDEPPDDAKEPPTDPR	0.966	0.966	0	0	0	0	0	36650.7	0	0	0	0	0
evm.model.Chr3.1008_S226	NEEDHDIKMDSMEEVDKDNLK	evm.model.Chr3.1008	MDsMEEVDKDNLK	1	1	0	0	0	0	0	87614.6	78860.9	52034.9	13119.8	30674.1	29418.3
evm.model.Chr3.1008_S342	RVERSPSSERSPSPVSSTTSV	evm.model.Chr3.1008	SPSSERsPsPVSSTTSVQSR	0.962	0.961	0.962	0.919	0	0	0.962	53917.3	57185.1	68984.1	0	0	32113.2
evm.model.Chr3.1008_S344	ERSPSSERSPSPVSSTTSVQS	evm.model.Chr3.1008	SPSSERsPsPVSSTTSVQSR;SPsPVSSTTSVQSR	0.971	0.966	0.966	0.965	0.967	0.94	0.971	505934	495349	500283	476588	421599	483255
evm.model.Chr3.1008_S382	VAPKKKPELHSPPKKKSKEIK	evm.model.Chr3.1008	KKPELHsPPK;KPELHsPPK	1	1	1	1	1	1	1	443498	400016	478732	140848	240831	126946
evm.model.Chr3.1008_S806	SNKHSKERKISLDGPRKSIEE	evm.model.Chr3.1008	KIsLDGPR	1	1	1	1	1	1	1	552491	430629	245309	487707	50786.7	482474
evm.model.Chr3.1008_T1658	ILSMMGKKESTPPPLPDSTTK	evm.model.Chr3.1008	EStPPPLPDSTTK;KEStPPPLPDSTTK	0.969	0.492	0.959	0.955	0.969	0	0.967	316883	624399	678942	170986	306543	553354
evm.model.Chr3.1026_S331	RGQDQRFYGGSGPTQRGGNGY	evm.model.Chr3.1026	FYGGsGPTQR	0.963	0	0.963	0	0	0	0	0	20121.5	0	0	0	0
evm.model.Chr3.1038_T119	VKTGRVMLGATNPADSQPGTI	evm.model.Chr3.1038	VMLGAtNPADSQPGTIR	0.972	0.969	0.97	0.965	0.964	0.972	0.97	241734	218698	304082	97259.2	158004	192680
evm.model.Chr3.1072_S38	GARVVVFDQNSPERNVEQKDG	evm.model.Chr3.1072	VVVFDQNsPER	1	1	1	1	0	1	1	54012.4	32754.1	31381.7	0	31801.7	43621.8
evm.model.Chr3.1085_S193	EKNKVAAAQLSLQKAALGPTK	evm.model.Chr3.1085	VAAAQLsLQK	1	0	0	1	0	0	0	0	0	12611.8	0	0	0
evm.model.Chr3.1085_S90	RSPRRSPRKVSPPKPRSPSPP	evm.model.Chr3.1085	KVsPPKPR;VsPPKPR	1	1	1	1	1	1	1	5.64428e+06	4.03058e+06	4614751	3.95537e+06	3.87037e+06	4151961
evm.model.Chr3.1099_S290	IDQSIEALSRSSLEAELSMKE	evm.model.Chr3.1099	sSLEAELSMK	0.952	0.495	0.952	0.95	0.495	0	0.937	277081	323697	323099	496394	0	564762
evm.model.Chr3.1099_T552	SSTKVPIEDVTSNRYSSQYEE	evm.model.Chr3.1099	VPIEDVtSNR	0.938	0	0.938	0	0	0.5	0	0	18940.8	0	29177.6	18818.3	0
evm.model.Chr3.1106_S368	LTPSGKKGRGSEETVDDMAQH	evm.model.Chr3.1106	GRGsEETVDDMAQHR;GsEETVDDMAQHR	0.963	0.963	0	0.958	0	0	0	71094.4	43475.6	88059.3	0	20952.2	0
evm.model.Chr3.1106_S414	RSEDKAPRRLSAPPSVSYGVG	evm.model.Chr3.1106	RLsAPPSVSYGVGEAR	0.965	0.615	0.965	0.964	0	0	0	42448.5	31044.5	171698	0	0	0
evm.model.Chr3.1106_S974	YDDDYDEGDTSADEANNITKK	evm.model.Chr3.1106	PMYDDDYDEGDTsADEANNITK	0.954	0.954	0	0	0	0	0	80013.7	0	90148.2	0	0	0
evm.model.Chr3.1107_S1779	SAKLHNDDAFSRNIMNESDPL	evm.model.Chr3.1107	LHNDDAFsR	1	1	0	1	0	0	0	21252.5	0	21618.7	0	36094.6	0
evm.model.Chr3.1107_S1786	DAFSRNIMNESDPLRTRVVGG	evm.model.Chr3.1107	NIMNEsDPLR	1	1	1	1	1	1	1	238926	225547	224072	153278	161740	180157
evm.model.Chr3.1109_S93	EEEKEVAKEESEEESDDDMGF	evm.model.Chr3.1109	EEsEEESDDDMGFGLFD;EVAKEEsEEESDDDMGFGLFD;EVAKEEsEEEsDDDMGFGLFD	1	1	1	1	1	0	0	144781	76987.5	2.27733e+06	52743.7	0	0
evm.model.Chr3.1109_S97	EVAKEESEEESDDDMGFGLFD	evm.model.Chr3.1109	EESEEEsDDDMGFGLFD;EVAKEESEEEsDDDMGFGLFD;EVAKEEsEEEsDDDMGFGLFD	1	1	1	1	1	0	0	174877	80350.4	2.85698e+06	35878.3	0	0
evm.model.Chr3.1111_S431	FAGRRTTRPASLHISSTATNK	evm.model.Chr3.1111	TTRPAsLHISSTATNK	0.951	0.951	0	0.929	0	0	0	19875.5	0	22256.3	0	0	0
evm.model.Chr3.1111_S741	NDTGRIPHNDSLSTAHRRFNA	evm.model.Chr3.1111	IPHNDsLSTAHR	0.964	0.933	0	0	0.937	0.964	0.959	17654.4	0	0	24210.4	24461.8	16837.5
evm.model.Chr3.1111_S899	SLPDRHSRHRSGGLRGSDNDL	evm.model.Chr3.1111	sGGLRGSDNDLPSR	0.964	0	0	0	0.964	0.454	0	118144	110842	107988	141996	138874	0
evm.model.Chr3.1111_S905	SRHRSGGLRGSDNDLPSRFAA	evm.model.Chr3.1111	GsDNDLPSR;SGGLRGsDNDLPSR	0.972	0.944	0.968	0.852	0.971	0.972	0	13987.8	101918	20251.6	0	0	0
evm.model.Chr3.1111_T479	KSNGPDGTPVTPTERNSDIKE	evm.model.Chr3.1111	SNGPDGTPVtPTER	0.971	0.966	0.964	0.963	0.968	0.965	0.971	291630	271655	262104	288417	266307	266630
evm.model.Chr3.1112_S184	QKYAEPQNTESPGGSKKPCCT	evm.model.Chr3.1112	YAEPQNTEsPGGSK	0.968	0.961	0.968	0.966	0.966	0.952	0.962	188451	159091	146445	168787	163225	154264
evm.model.Chr3.1125_S240	DRTKKSLYNSSPRKSSGVDKQ	evm.model.Chr3.1125	SLYNSsPR	0.965	0.955	0.96	0.943	0.965	0.955	0.928	255449	226010	279534	408812	369135	358550
evm.model.Chr3.1125_S252	RKSSGVDKQPSPIPQMKSETI	evm.model.Chr3.1125	QPsPIPQMK	1	1	0	1	0	0	1	26708.5	29031.6	21517.7	55648.2	33856.7	57359.7
evm.model.Chr3.1125_S478	GTAYNALQNESSSE*******	evm.model.Chr3.1125	KVSGTAYNALQNEsSSE;VSGTAYNALQNEsSSE	0.957	0.484	0.95	0.957	0.33	0.957	0.488	47191	51237.6	57085.5	29055.7	35756.2	40052.5
evm.model.Chr3.1125_S480	AYNALQNESSSE*********	evm.model.Chr3.1125	KVSGTAYNALQNESSsE;VSGTAYNALQNESSsE	0.966	0.954	0.966	0	0	0	0.949	129970	161844	169711	71296.1	86233.2	103916
evm.model.Chr3.1128_S19	LPVEPFPKTFSYHGDDDDAVS	evm.model.Chr3.1128	TFsYHGDDDDAVSTATASDMKPR	0.965	0.965	0	0.965	0	0	0	119135	47062.2	202665	0	0	0
evm.model.Chr3.1128_S365	PEMRNNLMQASLPAHA*****	evm.model.Chr3.1128	NNLMQAsLPAHA	1	1	0	0	0	1	0	0	0	0	0	44018.9	0
evm.model.Chr3.1131_S11	MAGLIPQRSVSGNIAGSLGRR	evm.model.Chr3.1131	SVsGNIAGSLGR	0.932	0	0.932	0	0	0	0	0	44557.9	66292.9	0	0	49217.1
evm.model.Chr3.1131_S17	QRSVSGNIAGSLGRRPDFQTF	evm.model.Chr3.1131	SVSGNIAGsLGR	0.97	0.968	0.962	0.948	0.97	0.887	0	31530.6	28102.1	37564.7	36005	37539	30011.2
evm.model.Chr3.1131_S9	**MAGLIPQRSVSGNIAGSLG	evm.model.Chr3.1131	sVSGNIAGSLGR	0.968	0.967	0.968	0.96	0	0	0	0	31564.7	29768.3	0	0	0
evm.model.Chr3.1132_S254	SYSDSEDDVKSGPSSIIQTRS	evm.model.Chr3.1132	sGPSSIIQTR;sGPSsIIQTR	0.973	0.966	0.969	0.967	0.973	0.973	0.972	368480	387241	335509	397152	449804	441667
evm.model.Chr3.1132_S258	SEDDVKSGPSSIIQTRSKSSD	evm.model.Chr3.1132	sGPSsIIQTR	0.956	0	0	0	0	0.956	0	0	0	0	0	26067.9	0
evm.model.Chr3.1132_S264	SGPSSIIQTRSKSSDSLDSSI	evm.model.Chr3.1132	sKSSDsLDSSIR;sKsSDSLDSSIR	0.962	0	0.956	0.962	0	0	0.956	22375.8	36179.4	61047.6	0	27096.6	20040.1
evm.model.Chr3.1132_S266	PSSIIQTRSKSSDSLDSSIRA	evm.model.Chr3.1132	SKsSDSLDSSIR;SKsSDsLDSSIR;sKsSDSLDSSIR;sSDSLDSSIR	0.967	0.961	0.96	0.966	0.958	0.967	0.967	1.48155e+06	1.32992e+06	1.28038e+06	1.5589e+06	1.42132e+06	1.51405e+06
evm.model.Chr3.1132_S267	SSIIQTRSKSSDSLDSSIRAY	evm.model.Chr3.1132	SKSsDSLDSSIR	0.961	0.961	0.95	0	0.931	0.959	0	82332.3	59944.8	65177	65529.9	64704.1	73244.7
evm.model.Chr3.1132_S269	IIQTRSKSSDSLDSSIRAYR*	evm.model.Chr3.1132	SKsSDsLDSSIR;SSDsLDSSIR;sKSSDsLDSSIR	0.962	0.947	0.962	0.954	0.941	0.959	0.959	660122	642910	641646	954368	704105	873753
evm.model.Chr3.1132_S273	RSKSSDSLDSSIRAYR*****	evm.model.Chr3.1132	SSDSLDSsIR	0.96	0.935	0	0	0	0.96	0.952	27764.3	0	14339.8	0	26231.9	37075
evm.model.Chr3.1140_S110	DNLRAYFAFQSPIAKALSVFC	evm.model.Chr3.1140	AYFAFQsPIAK	0.965	0	0	0.965	0	0	0	0	0	13391.9	0	0	0
evm.model.Chr3.1147_S100	WSQRDPSLRKSGVGNIFIKNL	evm.model.Chr3.1147	sGVGNIFIK	1	0	1	1	0	0	0	0	12095.8	23529.2	0	0	0
evm.model.Chr3.1147_S321	VTDDELREAFSTYGTITSAKI	evm.model.Chr3.1147	EAFsTYGTITSAK	0.951	0.487	0	0.951	0	0	0	8997.73	0	13695	0	0	0
evm.model.Chr3.1147_S434	FQGAQRTYMQSQIIRATPRWQ	evm.model.Chr3.1147	TYMQsQIIR	0.966	0.966	0	0	0	0	0	28672.6	0	28461.1	0	0	0
evm.model.Chr3.1147_T312	LYVKNLDDNVTDDELREAFST	evm.model.Chr3.1147	NLDDNVtDDELR	1	0	1	1	1	1	1	0	65950.9	69643	37923	42847.9	57470.8
evm.model.Chr3.1159_S328	NGDVIMEERKSEEEVGSGDAK	evm.model.Chr3.1159	KsEEEVGSGDAK;KsEEEVGsGDAK	1	0.963	0.969	0.954	0.887	1	0.957	40917.3	39025.4	36827.3	12999.6	48556.7	34295.1
evm.model.Chr3.1159_S384	SDDNKRKEEESENPENLEDKM	evm.model.Chr3.1159	KEEEsENPENLEDK	1	0	0	1	0	0	0	0	0	10639.1	0	0	0
evm.model.Chr3.1159_S445	ENAERNLRGISSDSSHTSASK	evm.model.Chr3.1159	GIssDSSHTSASK	0.941	0	0.941	0.591	0	0	0.781	0	30945.1	31182.7	0	0	27793.5
evm.model.Chr3.1159_S446	NAERNLRGISSDSSHTSASKG	evm.model.Chr3.1159	GISsDsSHTSASK;GIssDSSHTSASK	0.95	0	0.937	0.46	0.95	0	0.573	26638.1	62959.6	31182.7	37739.5	39024.9	27793.5
evm.model.Chr3.1159_S448	ERNLRGISSDSSHTSASKGSD	evm.model.Chr3.1159	GISsDsSHTSASK	0.945	0	0	0	0.945	0	0	26638.1	32014.4	0	37739.5	39024.9	0
evm.model.Chr3.1177_S1050	PLHTFSTRGGSLSAQVGDVKY	evm.model.Chr3.1177	GGsLSAQVGDVK	0.97	0.969	0.969	0.965	0	0.97	0	28794.1	29980.3	19260.5	19491.9	27092.5	29967.9
evm.model.Chr3.1177_S36	RKSKRKAPVKSPQGDPEGISQ	evm.model.Chr3.1177	APVKsPQGDPEGISQDEK;KAPVKsPQGDPEGISQDEK	0.968	0.94	0.968	0.967	0	0	0	33531.5	33677	29496.6	0	0	0
evm.model.Chr3.1177_S58	EKRVKLATDASDKENEIPKVL	evm.model.Chr3.1177	LATDAsDKENEIPK	0.97	0.965	0.967	0.964	0	0.97	0.969	347187	315005	311358	192041	219863	224722
evm.model.Chr3.1177_S837	KATKEESKLVSDDEVDKNAFR	evm.model.Chr3.1177	LVsDDEVDK;LVsDDEVDKNAFR	1	1	1	1	1	1	1	476078	448447	486958	442364	448384	512252
evm.model.Chr3.1177_T1067	DVKYTNNIKWTPSAPLRTITV	evm.model.Chr3.1177	WtPSAPLR	0.967	0	0	0.967	0	0	0	0	0	8408.31	0	0	0
evm.model.Chr3.1177_T55	SQDEKRVKLATDASDKENEIP	evm.model.Chr3.1177	LAtDASDKENEIPK	0.891	0	0	0	0.891	0	0	0	0	0	182707	0	239571
evm.model.Chr3.1233_S243	SRSPQKSRKRSPSEDNHNGET	evm.model.Chr3.1233	KRsPSEDNHNGETK;KRsPsEDNHNGETK	0.951	0	0.951	0	0	0	0	0	22480.7	0	0	0	0
evm.model.Chr3.1233_S245	SPQKSRKRSPSEDNHNGETKR	evm.model.Chr3.1233	KRsPsEDNHNGETK	0.951	0	0.951	0	0	0	0	0	22480.7	0	0	0	0
evm.model.Chr3.1233_S270	DSYRSRSRTGSPDNRDSPHRS	evm.model.Chr3.1233	TGsPDNRDsPHR;TGsPDNRDsPHRsP	0.967	0.954	0.967	0.964	0.962	0	0	142611	111198	180171	83391.8	0	82888.7
evm.model.Chr3.1233_S276	SRTGSPDNRDSPHRSP*****	evm.model.Chr3.1233	TGSPDNRDsPHR;TGSPDNRDsPHRsP;TGsPDNRDsPHR;TGsPDNRDsPHRsP	0.967	0.963	0.967	0.964	0.962	0	0.768	147398	132663	310881	83391.8	0	167811
evm.model.Chr3.1233_S280	SPDNRDSPHRSP*********	evm.model.Chr3.1233	TGSPDNRDsPHRsP;TGsPDNRDsPHRsP	0.967	0.954	0.967	0.964	0.962	0	0.767	107762	132663	275903	83391.8	0	167811
evm.model.Chr3.125_S7	****MSGYPKSPKPADNKDGF	evm.model.Chr3.125	SGYPKsPKPADNK	0.966	0	0	0.965	0	0	0.966	100584	87607.9	78542.4	0	96148.9	77617.4
evm.model.Chr3.126_S194	IDNSKESEEDSLDEFSKKYIT	evm.model.Chr3.126	ESEEDsLDEFSK	0.961	0	0	0	0	0	0.961	0	39902.9	37129.5	0	26470.1	38120.9
evm.model.Chr3.126_S488	DSLMSKVEIESPTSPMVGKSV	evm.model.Chr3.126	VEIEsPTSPMVGK	0.967	0	0	0	0	0	0.967	101722	101087	121072	45341.8	0	74255
evm.model.Chr3.126_S491	MSKVEIESPTSPMVGKSVSVD	evm.model.Chr3.126	VEIESPTsPMVGK	0.971	0	0	0	0.971	0	0.97	1.13817e+06	1.04044e+06	1143997	701899	985282	1.03209e+06
evm.model.Chr3.132_S1050	ELSFNFPTPKSAPPVASKPKY	evm.model.Chr3.132	sAPPVASKPK	0.97	0	0.97	0.968	0	0	0	0	44412.9	18265.6	0	0	0
evm.model.Chr3.132_S1119	ETGSTKRKKISLVSDQDLRTI	evm.model.Chr3.132	IsLVSDQDLR;KIsLVSDQDLR	0.97	0.967	0.967	0.968	0.946	0.964	0.97	48037.5	15875.8	68318.2	23856.5	29399.2	30564.7
evm.model.Chr3.132_S1122	STKRKKISLVSDQDLRTIKQE	evm.model.Chr3.132	ISLVsDQDLR	0.97	0	0.921	0	0	0.932	0.97	0	22932.9	45609.8	8875.59	37647.9	56401.1
evm.model.Chr3.132_S1141	QEEEKKYGTLSKDDIRKSMNI	evm.model.Chr3.132	YGTLsKDDIR	0.969	0.907	0.953	0.959	0.956	0.969	0.969	40960.5	39403.9	38804	38445.3	59235	48612
evm.model.Chr3.132_S1209	PQYSTPVSASSEEDLIRSLEK	evm.model.Chr3.132	LTPQYSTPVSASsEEDLIR	0.965	0	0	0.965	0	0	0	0	0	166863	0	0	0
evm.model.Chr3.132_S1242	PSSTGLSERLSLTSPDVKHDV	evm.model.Chr3.132	LsLTSPDVK	0.972	0.967	0.966	0.963	0	0.972	0	47754.1	48335.8	69335.9	0	72481.3	77088.3
evm.model.Chr3.132_S1245	TGLSERLSLTSPDVKHDVTRG	evm.model.Chr3.132	LSLTsPDVK	0.958	0	0	0.958	0.943	0	0.955	42855.6	50777.7	56601	53808.2	58070.3	80581.6
evm.model.Chr3.132_S1259	KHDVTRGHDLSPAERRALEAE	evm.model.Chr3.132	GHDLsPAER	1	1	1	1	1	1	1	40314.3	29243.2	36139.1	37370.1	37735.1	0
evm.model.Chr3.132_S379	QPTADQEDPESGEEYEEKEVT	evm.model.Chr3.132	SGLLQHQQPTADQEDPEsGEEYEEK	0.962	0.958	0.952	0.962	0	0	0	438005	258972	700576	0	0	0
evm.model.Chr3.132_S397	EVTFGDTGIGSDNEDEPRSDR	evm.model.Chr3.132	EVTFGDTGIGsDNEDEPR;EVTFGDTGIGsDNEDEPRsDR	0.958	0.887	0.952	0.958	0.93	0.839	0.835	1.74578e+06	1312823	2537526	236414	508720	588230
evm.model.Chr3.132_S405	IGSDNEDEPRSDRLHRKDTPH	evm.model.Chr3.132	EVTFGDTGIGsDNEDEPRsDR	0.934	0	0	0.934	0	0	0	0	0	33037	0	0	0
evm.model.Chr3.132_S577	EEGASEVKKQSVSFAPEPQMK	evm.model.Chr3.132	KQsVSFAPEPQMK	0.968	0.946	0.968	0.957	0	0.961	0	54943.5	66870	45287.3	0	55238.3	27751.8
evm.model.Chr3.132_S970	IANTLIQRADSSSSVDEGLTS	evm.model.Chr3.132	ADsSSSVDEGLTSEGR;ADsSSsVDEGLTSEGR	0.966	0.966	0	0.927	0.766	0.921	0.966	1.03346e+06	673703	888314	732856	711248	790473
evm.model.Chr3.132_S971	ANTLIQRADSSSSVDEGLTSE	evm.model.Chr3.132	ADSsSSVDEGLTSEGR	0.822	0	0	0.822	0	0	0.329	0	0	388043	0	0	152011
evm.model.Chr3.132_S973	TLIQRADSSSSVDEGLTSEGR	evm.model.Chr3.132	ADSSSsVDEGLTSEGR;ADsSSsVDEGLTSEGR	0.97	0.959	0.954	0.966	0.96	0.97	0	473095	166858	517790	447363	399483	159660
evm.model.Chr3.132_T1244	STGLSERLSLTSPDVKHDVTR	evm.model.Chr3.132	LSLtSPDVK	0.893	0	0	0	0	0.893	0	0	0	60841.9	52956.6	36538.9	0
evm.model.Chr3.132_T284	EGQGVLQRHLTPHPKELKRQQ	evm.model.Chr3.132	HLtPHPK	1	0	1	1	1	0	1	20701.4	24346.1	15359.7	24248.9	0	0
evm.model.Chr3.132_Y686	ITLTLYREDIYYTQPPVPGRN	evm.model.Chr3.132	EDIyYTQPPVPGR	0.967	0.967	0.951	0.966	0	0	0	23026.8	20781.3	42909.9	0	0	0
evm.model.Chr3.146_S195	PPDNRKTAARSFVEKPKKTIR	evm.model.Chr3.146	sFVEKPK	1	1	1	0	0	0	1	11066.7	16137.1	12348.4	0	0	15572.5
evm.model.Chr3.146_S212	KTIRGRDEEDSDDSDFES***	evm.model.Chr3.146	GRDEEDsDDSDFES;GRDEEDsDDsDFES	0.973	0.964	0.968	0.969	0.968	0.973	0.971	390085	676194	727475	272516	298860	338233
evm.model.Chr3.146_S215	RGRDEEDSDDSDFES******	evm.model.Chr3.146	GRDEEDSDDsDFES;GRDEEDsDDsDFES	0.973	0.965	0.968	0.969	0.955	0.973	0.971	378798	633687	736676	233340	289012	268072
evm.model.Chr3.146_T184	EMIRYKGDLATPPDNRKTAAR	evm.model.Chr3.146	GDLAtPPDNR;GDLAtPPDNRK;YKGDLAtPPDNR;YKGDLAtPPDNRK	1	1	1	1	1	1	1	1.18013e+06	951570	954094	801243	818602	859578
evm.model.Chr3.148_S530	ADESTKNAEVSTKPSPTSEEF	evm.model.Chr3.148	NAEVsTKPSPTSEEFGK	0.873	0	0.873	0	0	0	0	0	42433	0	0	0	0
evm.model.Chr3.14_S641	KARIPNLGGDSDEEDHKDTFD	evm.model.Chr3.14	IPNLGGDsDEEDHK	1	0	0	0	0	0	1	82667.4	0	178369	64915.9	0	129619
evm.model.Chr3.14_S841	TMVLSEEPDISPEKLVEMEIA	evm.model.Chr3.14	VETMVLSEEPDIsPEK	0.971	0	0	0	0	0	0.971	334777	220509	827727	0	74452.1	119395
evm.model.Chr3.151_S149	EWVIRRVATGSFIRRNVGVKE	evm.model.Chr3.151	VATGsFIR	0.965	0.72	0	0.949	0.949	0.964	0.965	46405	44069.2	48747.6	68718.5	83655.6	91029.7
evm.model.Chr3.151_S320	KSTRVAIFMGSPKDMAHCNSI	evm.model.Chr3.151	VAIFMGsPK	1	0	0	1	0	0	0	0	0	11621.2	0	0	0
evm.model.Chr3.16_S12	RQGNYNIETSSVSALDEAEKS	evm.model.Chr3.16	QGNYNIETSsVSALDEAEK	0.961	0.961	0	0	0	0	0	263188	0	519137	0	0	34877.7
evm.model.Chr3.173.1_S1264	SDSEYEFGYDSSPETYSRGSN	evm.model.Chr3.173.1	SDSEYEFGYDsSPETYSR	0.959	0	0	0.959	0	0	0	0	0	17741.6	0	0	0
evm.model.Chr3.173.1_S1281	RGSNGLRRMMSEPHDMNKMTD	evm.model.Chr3.173.1	MMsEPHDMNK	1	1	1	1	0	1	0	293042	264668	220592	207268	238439	259681
evm.model.Chr3.173.1_S309	NVLSELVERHSLSSMDLKDQL	evm.model.Chr3.173.1	HsLSSMDLK	0.972	0.965	0.969	0	0	0.965	0.972	181446	180002	183545	120052	241175	248997
evm.model.Chr3.173.1_S345	EPTLRIPHSRSQPVIINNPGK	evm.model.Chr3.173.1	sQPVIINNPGK	1	1	1	1	1	1	1	169187	170454	147520	256663	231064	232272
evm.model.Chr3.173.1_S379	NNDNVFHRQSSLPADERKRLD	evm.model.Chr3.173.1	QSsLPADER	0.966	0.96	0.792	0.966	0.9	0.913	0	130434	115179	112572	119448	128469	120303
evm.model.Chr3.173.1_S407	AHSKSADAFHSPEQKESPCDS	evm.model.Chr3.173.1	SADAFHsPEQK	0.973	0.906	0.954	0.968	0.973	0.946	0.971	171514	167974	153711	144505	168980	147686
evm.model.Chr3.176.1_S1881	WSQYYEPQQASPRTD******	evm.model.Chr3.176.1	LWSQYYEPQQAsPR	0.967	0	0	0.967	0	0	0	30130.8	0	39856.1	0	0	0
evm.model.Chr3.176.1_T1843	HRPSASFIQRTPPPYNPYSPM	evm.model.Chr3.176.1	tPPPYNPYSPMTTPSPR	0.971	0.969	0.969	0.966	0.967	0.971	0.971	1842246	1.37098e+06	2.72074e+06	216210	615099	687372
evm.model.Chr3.190_S122	EKQRNQKRKCSNEDFEGKTKL	evm.model.Chr3.190	KCsNEDFEGK	1	1	1	0	0	1	1	17903.5	23801	23795.2	0	0	16847.3
evm.model.Chr3.190_S256	TPKKKTPEKKSPQDVSEPLSA	evm.model.Chr3.190	KsPQDVSEPLSAK;sPQDVSEPLSAK;sPQDVSEPLsAK;sPQDVSEPLsAKK	0.973	0.97	0.97	0.968	0.973	0.972	0.971	1.93362e+06	1.77165e+06	1.55241e+06	1.95182e+06	1.80523e+06	1.97237e+06
evm.model.Chr3.190_S265	KSPQDVSEPLSAKKEKFMKYQ	evm.model.Chr3.190	SPQDVSEPLsAK;SPQDVSEPLsAKK;sPQDVSEPLsAK;sPQDVSEPLsAKK	0.972	0.968	0.97	0.967	0.972	0.97	0.969	374202	325563	330999	299440	193805	163212
evm.model.Chr3.190_S40	KKTKKGVLFDSDSSDEDPLPS	evm.model.Chr3.190	GVLFDsDSsDEDPLPSK	0.947	0	0	0.947	0	0	0	0	0	11712	0	0	0
evm.model.Chr3.190_S409	IKQEPSNSKPSPPKPKDIKVK	evm.model.Chr3.190	QEPSNSKPsPPKPK	0.965	0	0.965	0.965	0	0	0	461089	481267	440019	155461	171615	140604
evm.model.Chr3.190_S43	KKGVLFDSDSSDEDPLPSKVR	evm.model.Chr3.190	GVLFDSDSsDEDPLPSK;GVLFDsDSsDEDPLPSK	0.947	0	0	0.947	0	0	0	0	0	25395	0	0	0
evm.model.Chr3.190_S65	QLNSSIVIPDSGDESTKSKLK	evm.model.Chr3.190	KQLNSSIVIPDsGDESTK;QLNSSIVIPDsGDESTK	0.967	0.963	0.967	0.965	0.852	0.962	0.96	745344	628355	227793	140949	270249	347069
evm.model.Chr3.190_T225	ETDKDKIKENTPPVQKVSHKP	evm.model.Chr3.190	IKENtPPVQK	1	1	1	1	1	1	0	489015	451727	436953	427127	416268	408988
evm.model.Chr3.192_S516	HDAEDRSDAESQSSQPPINYQ	evm.model.Chr3.192	SDAEsQSSQPPINYQIK	0.963	0.959	0.959	0.952	0	0.963	0	54052.3	48031	63563.4	0	36748	0
evm.model.Chr3.192_T81	PAQITISQPATPPTQRKVEES	evm.model.Chr3.192	PAQITISQPAtPPTQR;PAQITISQPAtPPTQRK	0.964	0	0	0.964	0	0	0	1.92247e+06	1514926	2.63266e+06	490122	983972	1.09522e+06
evm.model.Chr3.195_S16	KPIDVEMGDMSDETKELNPEV	evm.model.Chr3.195	GSPEKPIDVEMGDMsDETK;GsPEKPIDVEMGDMsDETK;PIDVEMGDMsDETK	0.968	0.956	0.964	0.968	0	0.959	0.953	1361322	1.11432e+06	1882661	315069	637842	738099
evm.model.Chr3.195_S3	********MGSPEKPIDVEMG	evm.model.Chr3.195	GsPEKPIDVEMGDMSDETK;GsPEKPIDVEMGDMSDEtK;GsPEKPIDVEMGDMsDETK	0.966	0.965	0.965	0.966	0.743	0.964	0.929	2038791	1.64841e+06	2.96177e+06	225119	1.00928e+06	1.11977e+06
evm.model.Chr3.195_T19	DVEMGDMSDETKELNPEVKVE	evm.model.Chr3.195	GsPEKPIDVEMGDMSDEtK	0.838	0.838	0	0	0	0	0	59228	0	179802	0	0	0
evm.model.Chr3.215_S853	EKSRSLPRTASPSELRGDAKH	evm.model.Chr3.215	TAsPSELR	0.97	0.966	0.963	0.965	0.933	0.95	0.97	73418.2	24996	11338.8	89763.6	94441.9	115921
evm.model.Chr3.215_T851	SIEKSRSLPRTASPSELRGDA	evm.model.Chr3.215	tASPSELR	0.946	0	0	0.946	0	0	0	0	0	70953.9	0	0	0
evm.model.Chr3.222_S13	HRKFSAPRHGSLGFLPRKRSS	evm.model.Chr3.222	HGsLGFLPR	1	1	1	1	0	0	0	18757.8	14440	34645.3	0	0	0
evm.model.Chr3.222_S350	PKKRVLTLRKSLITHTKRAAL	evm.model.Chr3.222	sLITHTK	0.973	0	0	0.963	0.973	0.969	0.972	0	0	17820.6	0	0	43150.5
evm.model.Chr3.222_S407	LAAAAAAAAPSTTA*******	evm.model.Chr3.222	LAAAAAAAAPsTTA	0.957	0.957	0.492	0.333	0.412	0.486	0.483	1.40747e+06	1.37062e+06	1303227	92918.1	1.34819e+06	1.22111e+06
evm.model.Chr3.222_T409	AAAAAAAPSTTA*********	evm.model.Chr3.222	LAAAAAAAAPSTtA	0.963	0	0.963	0.949	0	0.925	0	1.40124e+06	518111	1.21518e+06	0	1.28331e+06	1.46923e+06
evm.model.Chr3.25_S49	MMQPRMFIPHSVHGRRRDEQS	evm.model.Chr3.25	MFIPHsVHGR	1	0	0	1	0	0	0	0	0	25236	0	0	0
evm.model.Chr3.301_S58	VEGSGRVAHISVDQLREKVKD	evm.model.Chr3.301	VAHIsVDQLR	1	1	0	1	0	0	0	12563.2	0	24248.4	0	0	0
evm.model.Chr3.303_S27	SRLEESELESSQGKLSLEQYS	evm.model.Chr3.303	LEESELESsQGK	0.948	0.948	0	0	0.913	0	0.947	50108.1	0	34602.2	44278.3	35490.7	37220.3
evm.model.Chr3.316_S36	LWRELAEDGYSGVEVRVTPSR	evm.model.Chr3.316	ELAEDGYsGVEVR	0.967	0.91	0.957	0.958	0.936	0.967	0.957	88784.8	90219.3	102118	33148.7	47562.1	65569.9
evm.model.Chr3.339_S102	KINAMTKNFQSLESRLSALEG	evm.model.Chr3.339	NFQsLESR	0.972	0.951	0	0.958	0.972	0.967	0.968	67324.3	64406.1	69247.8	80570.8	88820.7	87759.3
evm.model.Chr3.339_S72	KIQDTLKDTSSASSSNDVEEL	evm.model.Chr3.339	DTSsASSSNDVEELKK	0.942	0.942	0	0	0	0.248	0	44821.5	40445.7	39421.2	0	14870.1	0
evm.model.Chr3.339_S74	QDTLKDTSSASSSNDVEELKK	evm.model.Chr3.339	DTSSAsSSNDVEELKK	0.93	0	0.327	0.321	0	0	0.93	34749.1	38002.2	35929.5	0	0	21728.7
evm.model.Chr3.339_T123	GAKSTTANPATPKTPTQNGAA	evm.model.Chr3.339	STTANPAtPK	0.972	0.958	0.946	0.952	0.967	0.96	0.972	405229	431841	410619	537327	494840	459816
evm.model.Chr3.343_S1368	ELQRALSKANSEVAQWRTKYE	evm.model.Chr3.343	ANsEVAQWR	1	0	1	1	0	0	0	0	14442.8	13428.5	0	0	0
evm.model.Chr3.370_S284	ILPQLPTHRSSPGPNHPQLPV	evm.model.Chr3.370	SsPGPNHPQLPVAQQSPFQPR	0.937	0	0	0.937	0	0	0	0	0	98964.6	0	0	0
evm.model.Chr3.370_S596	PSMEMSSDIVSPQPIKEKHEG	evm.model.Chr3.370	ESPSMEMSSDIVsPQPIK	0.971	0.969	0.969	0.968	0.966	0.971	0.97	297062	224669	431578	64730.2	146799	243313
evm.model.Chr3.370_S898	LYFSPRGNQPSDDDDEDDTDG	evm.model.Chr3.370	GNQPsDDDDEDDTDGEETK	0.96	0.96	0.954	0.95	0	0	0	27471.3	32289.2	34588.8	0	0	0
evm.model.Chr3.370_S919	EETKEKFAEKSPKKLLGGYLS	evm.model.Chr3.370	FAEKsPK	1	1	1	1	1	1	1	69138.6	78944.2	77642.8	86676	71984.7	59913.9
evm.model.Chr3.391_S207	PQAVAAGPVDSADADLEARLN	evm.model.Chr3.391	GPQAVAAGPVDsADADLEAR	1	1	0	1	0	0	0	59450.9	0	183998	0	0	0
evm.model.Chr3.402_S167	AFFTSSKNWDSDYEDDFSRKK	evm.model.Chr3.402	NWDsDYEDDFSR	0.967	0.964	0.967	0	0	0	0	30425.6	15982.9	59141.6	0	0	0
evm.model.Chr3.413_S247	VTNNHLTNETSPTKSVGKSRK	evm.model.Chr3.413	NGFENNVTNNHLTNETsPTK	0.945	0.945	0.938	0.927	0	0	0	278613	84144.4	394466	0	33304.5	0
evm.model.Chr3.413_S84	QDREVNSENQSPTKTTSPTKT	evm.model.Chr3.413	EVNSENQsPTK	0.968	0.96	0.968	0.959	0.949	0.964	0.954	217107	225223	202136	271418	251124	180813
evm.model.Chr3.413_S90	SENQSPTKTTSPTKTSPVKQS	evm.model.Chr3.413	TTsPTKTsPVK	0.969	0.959	0.961	0.956	0.969	0.958	0.968	858570	819300	816680	924100	866030	811783
evm.model.Chr3.413_S95	PTKTTSPTKTSPVKQSKPVAP	evm.model.Chr3.413	TTsPTKTsPVK	0.969	0.96	0.961	0.955	0.969	0.96	0.968	858570	819300	816680	924100	866030	811783
evm.model.Chr3.413_T222	EKQKSPVKQATPPQQVSQKNG	evm.model.Chr3.413	QAtPPQQVSQK	0.973	0.969	0.971	0.967	0.973	0.972	0.972	452283	414760	393405	468007	477981	459045
evm.model.Chr3.413_T243	FENNVTNNHLTNETSPTKSVG	evm.model.Chr3.413	NGFENNVTNNHLtNETSPTK	0.929	0.278	0.329	0.929	0	0	0.249	0	0	0	0	0	10819.1
evm.model.Chr3.413_T246	NVTNNHLTNETSPTKSVGKSR	evm.model.Chr3.413	NGFENNVTNNHLTNEtSPTK	0.963	0.482	0.963	0	0	0	0	174457	139157	232248	0	0	0
evm.model.Chr3.413_T249	NNHLTNETSPTKSVGKSRKSS	evm.model.Chr3.413	NGFENNVTNNHLTNETSPtK	0.936	0	0.936	0	0	0	0	0	106525	0	0	0	0
evm.model.Chr3.427.1_S132	VLPPRPRYRASPSRFYEEEEE	evm.model.Chr3.427.1	YRAsPSR	0.96	0	0.96	0.764	0	0	0	22203.2	16590.9	12356.1	0	0	0
evm.model.Chr3.443_S380	VFYKVTLDFESPQR*******	evm.model.Chr3.443	VTLDFEsPQR	0.972	0.963	0.968	0.968	0.957	0.964	0.972	167268	145713	219553	73407.6	133108	164291
evm.model.Chr3.463_S116	AKAKTGILQDSEPTVARLDFR	evm.model.Chr3.463	TGILQDsEPTVAR	0.968	0	0.968	0.966	0	0	0.966	24594	35781	38099.3	0	14653.6	25052.5
evm.model.Chr3.463_S6	*****MWKSYSLGAFNKHIGV	evm.model.Chr3.463	SYsLGAFNK	0.955	0	0	0.955	0	0	0	0	0	27864	0	0	0
evm.model.Chr3.465_S119	EQIFKDAHVISPFKLKSTCKT	evm.model.Chr3.465	DAHVIsPFK	1	1	1	1	1	1	1	1.0319e+06	960689	1.0319e+06	689971	805207	826009
evm.model.Chr3.472_S221	SERFDGGDNGSDSSFTERISL	evm.model.Chr3.472	FDGGDNGsDSSFTER	0.948	0.948	0	0	0	0	0	13068.7	0	0	0	0	0
evm.model.Chr3.472_S3	********MRSPSNMWKAIIL	evm.model.Chr3.472	MRsPSNMWK	0.948	0.931	0	0.948	0	0	0	139626	90672.5	77630.9	0	34994.8	64344.7
evm.model.Chr3.497_S13	NIVPASHNNNSILNQNKHPGA	evm.model.Chr3.497	ANIVPASHNNNsILNQNK	0.948	0	0.936	0.948	0	0	0	0	19357	38767.3	0	0	0
evm.model.Chr3.497_S41	KSSSKDKSTHSGQVGEGEDWR	evm.model.Chr3.497	STHsGQVGEGEDWR	0.94	0.94	0	0	0	0	0	15875.6	0	0	0	0	0
evm.model.Chr3.497_S8	***MANIVPASHNNNSILNQN	evm.model.Chr3.497	ANIVPAsHNNNSILNQNK	0.889	0	0	0.889	0	0	0	0	0	27449.9	0	0	0
evm.model.Chr3.497_T461	YSKEDGHEVVTD*********	evm.model.Chr3.497	EDGHEVVtD	1	1	1	1	0	1	1	357295	292030	315217	519516	486576	484326
evm.model.Chr3.506_S473	QMGSPNNAISSVS********	evm.model.Chr3.506	VLTQMGSPNNAISsVs	0.965	0	0.956	0.965	0	0	0	0	0	68689.1	0	0	0
evm.model.Chr3.506_S475	GSPNNAISSVS**********	evm.model.Chr3.506	VLTQMGSPNNAISSVs;VLTQMGSPNNAISsVs	0.967	0	0.966	0.965	0.962	0.967	0	41958.1	66086.9	147667	30848.6	62418.3	0
evm.model.Chr3.507_S145	NTGKLEFKQVSDEEELALSSR	evm.model.Chr3.507	QVsDEEELALSSR	0.969	0	0.969	0	0	0.933	0	0	39111.1	46536.5	0	19895.9	0
evm.model.Chr3.507_S170	RKVTSFRFGGSGDEGDLKNTN	evm.model.Chr3.507	FGGsGDEGDLK	1	1	0	1	1	1	1	33593.7	214346	222865	200873	284511	354640
evm.model.Chr3.507_S205	DIDDKRRRKLSLQGKDKLNKL	evm.model.Chr3.507	KLsLQGK	1	1	1	0	0	0	0	36087.7	52925.4	82233.6	0	118986	0
evm.model.Chr3.507_S446	KLEDRVAVAASTDEDEDALMQ	evm.model.Chr3.507	VAVAAsTDEDEDALMQPSGEEK;VAVAAstDEDEDALMQPSGEEK	0.971	0.806	0.971	0.969	0	0	0	81049.7	169139	419027	0	0	0
evm.model.Chr3.507_S64	DIDKNGLDDGSAGKNDADSLA	evm.model.Chr3.507	NGLDDGsAGKNDADSLAR	0.957	0.954	0	0.957	0	0	0	35588.4	0	38305.1	0	0	0
evm.model.Chr3.507_T447	LEDRVAVAASTDEDEDALMQP	evm.model.Chr3.507	VAVAAStDEDEDALMQPSGEEK;VAVAAstDEDEDALMQPSGEEK	0.971	0.806	0.971	0.969	0	0	0	32899.6	139420	346242	0	0	0
evm.model.Chr3.51.7_S230	KKIQPVPLERSPVRHRRRDVA	evm.model.Chr3.51.7	IQPVPLERsPVR	1	1	1	1	0	0	0	46639	46858.8	45209.7	19585.9	32466.2	36840.2
evm.model.Chr3.51.7_S373	SRCRTISYFSSPKRRGISSTD	evm.model.Chr3.51.7	TISYFSsPK	0.961	0.961	0	0	0	0	0	38256.1	0	28761.4	0	0	0
evm.model.Chr3.51.7_S459	DRPLNSRRRLSSPVSDHRVPA	evm.model.Chr3.51.7	RLsSPVSDHR;RLssPVSDHR	0.967	0.955	0.967	0.942	0	0.965	0.825	95637.1	72847.5	66976.1	39074.2	79939.9	60920
evm.model.Chr3.51.7_S460	RPLNSRRRLSSPVSDHRVPAQ	evm.model.Chr3.51.7	LSsPVSDHR;LSsPVsDHR;RLssPVSDHR	0.967	0.955	0.967	0.942	0	0.965	0.925	42531.3	47253.3	69297.4	0	46289.3	32770.9
evm.model.Chr3.51.7_S463	NSRRRLSSPVSDHRVPAQYGP	evm.model.Chr3.51.7	LSsPVsDHR	0.952	0	0.952	0	0	0	0	0	18352.3	18232.4	0	0	0
evm.model.Chr3.51.7_S485	RGSSYMSRTNSGNIIGPNSIQ	evm.model.Chr3.51.7	TNsGNIIGPNSIQQTDTR	0.961	0.939	0.958	0.961	0	0	0	94028.4	79719.7	110093	0	0	0
evm.model.Chr3.51.7_S624	TTARFMNKRPSFGGRYDPHIH	evm.model.Chr3.51.7	RPsFGGR	1	1	0	0	0	1	0	65374.5	0	31722.5	49512.4	71032.9	0
evm.model.Chr3.51.7_S644	HRRESRQYDGSFEKFTGSCWG	evm.model.Chr3.51.7	QYDGsFEK	0.944	0	0	0	0.903	0.944	0	46096	48938.2	39100.5	65644.2	82532.4	76991.1
evm.model.Chr3.510_S1309	EALELTDGGVSPSEDRVQVAV	evm.model.Chr3.510	EALELTDGGVsPSEDR	0.973	0.968	0.97	0.966	0.973	0.972	0.971	1.19154e+06	884550	1.49366e+06	370554	608926	729698
evm.model.Chr3.510_S1311	LELTDGGVSPSEDRVQVAVEE	evm.model.Chr3.510	EALELTDGGVSPsEDR	0.952	0.952	0.574	0	0	0	0	25115.1	89038	109618	0	0	0
evm.model.Chr3.510_S4379	KTKEKRTRTTSLQDVDGRPQW	evm.model.Chr3.510	TTsLQDVDGR	0.97	0.964	0.947	0.953	0.928	0.97	0.968	1060226	1.06722e+06	1.01369e+06	1.66441e+06	1365447	1.62644e+06
evm.model.Chr3.510_S5	******MAGNSGGDTSMLEDV	evm.model.Chr3.510	AGNsGGDTSMLEDVQEVAK	0.961	0	0	0.961	0	0	0	0	0	37582.2	0	0	0
evm.model.Chr3.529_S223	SAIRSSNKDNSSDDEEY****	evm.model.Chr3.529	SSNKDNsSDDEEY	0.958	0	0.958	0	0.491	0.931	0.953	29505.5	32529	31279	47883	45704.6	50888.5
evm.model.Chr3.529_S224	AIRSSNKDNSSDDEEY*****	evm.model.Chr3.529	SSNKDNSsDDEEY	0.892	0	0	0.892	0	0	0	0	0	29110.9	0	0	0
evm.model.Chr3.538.1_S102	ENREKGLPDTSEEESTEESDE	evm.model.Chr3.538.1	GLPDTsEEEsTEESDETEAAPR;GLPDtsEEESTEESDETEAAPR	0.829	0	0	0.829	0	0	0	0	0	467647	0	0	0
evm.model.Chr3.538.1_S106	KGLPDTSEEESTEESDETEAA	evm.model.Chr3.538.1	GLPDTsEEEsTEESDETEAAPR	0.828	0	0	0.828	0	0	0	0	0	467647	0	0	0
evm.model.Chr3.538.1_S128	RSTKAKNGRRSSIEEPVTVPK	evm.model.Chr3.538.1	RsSIEEPVTVPK;RssIEEPVTVPK;sSIEEPVTVPK	0.972	0.965	0.963	0.966	0.97	0.972	0.959	7426808	3141357	6388754	8085766	4.06289e+06	2.54384e+06
evm.model.Chr3.538.1_S129	STKAKNGRRSSIEEPVTVPKK	evm.model.Chr3.538.1	RSsIEEPVTVPK;RssIEEPVTVPK;SsIEEPVTVPK	0.972	0.965	0.961	0.966	0.97	0.972	0.959	10100000	9580411	9796130	6.532e+06	8479050	9420568
evm.model.Chr3.538.1_S172	SHYLLTRTTVSPSALSPSKPT	evm.model.Chr3.538.1	TTVsPSALSPSKPTSATPPR	0.95	0	0	0.95	0	0	0	12423	0	27153.7	0	0	0
evm.model.Chr3.538.1_S177	TRTTVSPSALSPSKPTSATPP	evm.model.Chr3.538.1	TTVSPSALsPSKPTSATPPR;TTVSPSALsPSKPTSAtPPR	0.937	0.937	0.833	0	0	0	0	142275	126655	153229	0	0	41990.2
evm.model.Chr3.538.1_S179	TTVSPSALSPSKPTSATPPRG	evm.model.Chr3.538.1	TTVSPSALSPsKPTSATPPR	0.936	0	0.698	0.936	0	0	0	0	39526.7	139960	0	38227.4	0
evm.model.Chr3.538.1_S190	KPTSATPPRGSRLSPDTTADA	evm.model.Chr3.538.1	GsRLSPDTTADADSTTSPVIK	0.964	0.377	0.881	0.482	0.964	0	0	385834	333906	511653	55329.9	168795	0
evm.model.Chr3.538.1_S193	SATPPRGSRLSPDTTADADST	evm.model.Chr3.538.1	GSRLsPDTTADADSTTSPVIK;GSRLsPDTTADADSTTsPVIK;LsPDTTADADSTTSPVIK;LsPDTTADADSTTsPVIK;LsPDTTADADStTSPVIK;LsPDTTADADsTTSPVIK	0.972	0.968	0.97	0.965	0.971	0.972	0.97	3597075	3522162	3901078	1.96995e+06	2.69861e+06	3223029
evm.model.Chr3.538.1_S202	LSPDTTADADSTTSPVIKEVI	evm.model.Chr3.538.1	LSPDTTADADsTTsPVIK;LsPDTTADADsTTSPVIK	0.959	0	0.576	0.577	0	0.959	0.577	0	65527.2	746199	25951.3	208852	817045
evm.model.Chr3.538.1_S205	DTTADADSTTSPVIKEVIPTD	evm.model.Chr3.538.1	GSRLsPDTTADADSTTsPVIK;LSPDTTADADSTTsPVIK;LSPDTTADADsTTsPVIK;LsPDTTADADSTTsPVIK	0.972	0.968	0.968	0.962	0.969	0.972	0.97	1.65788e+06	1628276	1.944e+06	909268	1.37338e+06	869956
evm.model.Chr3.538.1_T185	ALSPSKPTSATPPRGSRLSPD	evm.model.Chr3.538.1	TTVSPSALSPSKPTSAtPPR;TTVSPSALsPSKPTSAtPPR	0.927	0.927	0.849	0	0	0	0	132195	136545	178728	0	0	0
evm.model.Chr3.538.1_T203	SPDTTADADSTTSPVIKEVIP	evm.model.Chr3.538.1	LsPDTTADADStTSPVIK	0.942	0	0	0	0.942	0	0	0	0	0	368052	0	0
evm.model.Chr3.539.1_S660	HIMMMEKDNLSLPSSDHSRSY	evm.model.Chr3.539.1	DNLsLPSSDHSR;DNLsLPSSDHsR;DNLsLPSsDHSR;DNLsLPSsDHsR;DNLsLPsSDHSR	0.969	0.969	0.966	0.956	0.717	0.946	0.926	342823	461228	472841	401497	398896	367973
evm.model.Chr3.539.1_S663	MMEKDNLSLPSSDHSRSYPVT	evm.model.Chr3.539.1	DNLSLPsSDHSR;DNLsLPsSDHSR	0.959	0.627	0.949	0.627	0	0.959	0.621	155814	25952.1	26193.1	165531	266055	294056
evm.model.Chr3.539.1_S664	MEKDNLSLPSSDHSRSYPVTC	evm.model.Chr3.539.1	DNLSLPSsDHSR;DNLSLPSsDHsR;DNLsLPSsDHSR;DNLsLPSsDHsR	0.966	0.941	0.966	0.956	0.94	0.946	0.961	321203	479758	487175	347124	426370	364382
evm.model.Chr3.539.1_S667	DNLSLPSSDHSRSYPVTCTVS	evm.model.Chr3.539.1	DNLSLPSsDHsR;DNLsLPSSDHsR;DNLsLPSsDHsR	0.966	0.94	0.966	0.765	0	0.946	0.925	224079	300827	446489	158891	284511	67712.1
evm.model.Chr3.539.1_S895	KATGRQKWNGSPDSGVNTLRH	evm.model.Chr3.539.1	WNGsPDSGVNTLR	0.972	0.97	0.969	0.968	0	0.971	0.972	134736	129921	138436	11563.7	29616.9	32858.7
evm.model.Chr3.539.1_S906	PDSGVNTLRHSPIPSSMLGVP	evm.model.Chr3.539.1	HsPIPSSMLGVPDVNHGR	0.963	0	0	0.963	0	0	0	0	0	33464.5	0	0	0
evm.model.Chr3.551_S687	LRFAGVKRSSSRGDSDDESSV	evm.model.Chr3.551	SSsRGDsDDESSVNSR	0.959	0.957	0.951	0	0.946	0	0.959	54457.3	66688.7	0	69071.7	0	78790.7
evm.model.Chr3.551_S691	GVKRSSSRGDSDDESSVNSRS	evm.model.Chr3.551	GDsDDESSVNSR;SSsRGDsDDESSVNSR	0.972	0.969	0.97	0.968	0.969	0.972	0.972	126206	147565	69282.6	179808	136025	174775
evm.model.Chr3.563_S99	RVQLYNRKVASLTSGSRYKQQ	evm.model.Chr3.563	VAsLTSGSR	0.97	0.967	0.97	0.966	0.97	0.959	0.967	19733.8	16268.3	18140.7	23276.3	0	0
evm.model.Chr3.563_T101	QLYNRKVASLTSGSRYKQQPL	evm.model.Chr3.563	VASLtSGSR	0.963	0.906	0.939	0.938	0.963	0.332	0.958	50420.6	47746.2	51220.6	99411.9	90741.8	94014.6
evm.model.Chr3.566_S121	TRNWEMASSVSPQKSYKSSQE	evm.model.Chr3.566	NWEMASSVsPQK;NWEMASsVsPQK	0.971	0.967	0.97	0.965	0.969	0.969	0.971	588522	535028	544183	318217	446940	474374
evm.model.Chr3.57.1_S177	NQSGTRKRVISNESDSDKFEE	evm.model.Chr3.57.1	VIsNEsDSDKFEENFIK	0.961	0	0	0.961	0	0	0	0	29388.4	303411	0	0	0
evm.model.Chr3.57.1_S180	GTRKRVISNESDSDKFEENFI	evm.model.Chr3.57.1	VIsNEsDSDKFEENFIK	0.961	0	0	0.961	0	0	0	0	29388.4	303411	0	0	0
evm.model.Chr3.57.1_T151	QPENNSEIPTTPTIMRGTSQT	evm.model.Chr3.57.1	QPENNSEIPTtPTIMR	0.906	0	0	0	0	0.901	0.906	61970.5	61109	52038.4	0	47749.5	46333.4
evm.model.Chr3.570_S107	QEITSDQRQQSVSPNSSEPDW	evm.model.Chr3.570	QQsVsPNSSEPDWTVVNDSSK	0.944	0	0	0.944	0	0.492	0	0	0	61806.6	0	49814.7	0
evm.model.Chr3.570_S109	ITSDQRQQSVSPNSSEPDWTV	evm.model.Chr3.570	QQSVsPNSSEPDWTVVNDSSK;QQSVsPNSsEPDWTVVNDSSK;QQsVsPNSSEPDWTVVNDSSK	0.965	0.953	0.965	0.962	0	0.492	0	775384	681770	1.13412e+06	0	95010.2	117761
evm.model.Chr3.570_S112	DQRQQSVSPNSSEPDWTVVND	evm.model.Chr3.570	QQSVSPNsSEPDWTVVNDSSK;QQSVSPNssEPDWTVVNDSSK	0.958	0.486	0.958	0.947	0	0	0.34	180551	60926.1	554857	0	0	42436.5
evm.model.Chr3.570_S113	QRQQSVSPNSSEPDWTVVNDS	evm.model.Chr3.570	QQSVSPNSsEPDWTVVNDSSK;QQSVSPNssEPDWTVVNDSSK;QQSVsPNSsEPDWTVVNDSSK	0.962	0.953	0.958	0.962	0	0	0	593401	361849	717080	0	43255.6	0
evm.model.Chr3.570_S292	QLRRPKHERASIVPEDSTEAV	evm.model.Chr3.570	AsIVPEDSTEAVGSSR	0.971	0	0.961	0.958	0.971	0.968	0.926	110374	112790	95588.6	60143.5	75965.2	66827.5
evm.model.Chr3.597_S137	RKRTRHTNTNSPSSPNVVKRR	evm.model.Chr3.597	HTNTNsPSSPNVVK	0.936	0	0	0	0.936	0	0.49	172192	0	0	142969	160039	146084
evm.model.Chr3.597_S139	RTRHTNTNSPSSPNVVKRRR*	evm.model.Chr3.597	HTNTNSPssPNVVK	0.862	0	0.862	0	0	0	0	0	20915.1	0	0	17732	0
evm.model.Chr3.597_S140	TRHTNTNSPSSPNVVKRRR**	evm.model.Chr3.597	HTNTNSPSsPNVVK;HTNTNSPssPNVVK	0.92	0.92	0.862	0	0	0	0	164268	176810	142840	0	17732	0
evm.model.Chr3.597_S78	NLRALDDSEASPFKNTQKEFK	evm.model.Chr3.597	ALDDSEAsPFK	0.97	0.962	0.969	0.883	0.963	0.97	0.97	39888.7	56484.2	49523.9	57662.6	60816.4	55490.9
evm.model.Chr3.625_T240	ENYKTEGYVVTENTMKLMEEH	evm.model.Chr3.625	TEGYVVtENtMK	0.96	0	0	0	0	0	0.96	494932	468480	433933	465094	412997	467496
evm.model.Chr3.625_T243	KTEGYVVTENTMKLMEEHLKI	evm.model.Chr3.625	TEGYVVtENtMK	0.961	0	0	0	0	0	0.961	494932	468480	433933	465094	412997	467496
evm.model.Chr3.627_S89	KSFNETPDNDSDDDSESNTGI	evm.model.Chr3.627	SFNETPDNDsDDDSESNTGISEVR;SFNETPDNDsDDDsESNTGISEVR	0.968	0.968	0	0.965	0	0	0	2.93997e+06	2.73566e+06	3924951	250037	710479	691530
evm.model.Chr3.627_S93	ETPDNDSDDDSESNTGISEVR	evm.model.Chr3.627	SFNETPDNDSDDDsESNTGISEVR;SFNETPDNDsDDDsESNTGISEVR	0.965	0	0	0.965	0	0	0.95	2388045	2.10211e+06	3292715	0	733747	100758
evm.model.Chr3.627_T84	YVMYNKSFNETPDNDSDDDSE	evm.model.Chr3.627	SFNEtPDNDSDDDSESNTGISEVR	0.964	0	0.964	0.96	0	0	0	133579	115595	153201	0	0	0
evm.model.Chr3.631_S11	MSKRRKNRVVSDSDESSAEED	evm.model.Chr3.631	VVsDSDESSAEEDSLSAESSTK	0.948	0.247	0.478	0.948	0	0	0	33271.6	31910.9	37076.8	0	0	0
evm.model.Chr3.631_S156	LWKEFDDGYDSELVGDEEDRA	evm.model.Chr3.631	EFDDGYDsELVGDEEDR	0.97	0.969	0.97	0.969	0	0.958	0.911	400443	181001	811795	0	32598.1	30122
evm.model.Chr3.631_S16	KNRVVSDSDESSAEEDSLSAE	evm.model.Chr3.631	VVSDSDEssAEEDSLSAESSTK	0.938	0	0	0.938	0	0	0	0	0	26653.6	0	0	0
evm.model.Chr3.631_S17	NRVVSDSDESSAEEDSLSAES	evm.model.Chr3.631	VVSDSDEssAEEDSLSAESSTK	0.938	0	0	0.938	0	0	0	0	0	26653.6	0	0	0
evm.model.Chr3.631_S305	SDSDISRKAGSMDEDDDRTSN	evm.model.Chr3.631	AGsMDEDDDR;KAGsMDEDDDR	1	1	1	1	1	1	1	54851.2	56807.4	60098.9	79590.1	77704.1	30448.4
evm.model.Chr3.631_S36	ESSTKRPRNDSINDAPKAKVV	evm.model.Chr3.631	NDsINDAPK	1	1	1	1	1	1	0	53490.4	42650.6	45247.1	83782.9	95088.9	77433.9
evm.model.Chr3.645_T1205	LDKYEWAVIPTDHASESPTKK	evm.model.Chr3.645	YEWAVIPtDHASESPTK	0.946	0	0.946	0	0	0	0	0	10320.4	46994.6	0	0	0
evm.model.Chr3.661_S285	PWICQRDRVASHIHRQDTVDC	evm.model.Chr3.661	VAsHIHR	1	1	1	1	0	0	0	0	15027.8	19661.2	0	0	0
evm.model.Chr3.661_S338	KESNKEPQAQSTVVRANTAIA	evm.model.Chr3.661	ESNKEPQAQsTVVR	0.927	0.927	0.495	0.495	0	0.495	0.495	57567.5	250975	244401	0	249511	300261
evm.model.Chr3.661_S350	VVRANTAIAKSVGENGLDLTP	evm.model.Chr3.661	sVGENGLDLTPEEIK	0.973	0.97	0.971	0.969	0.973	0.972	0.967	258853	209980	688806	32244.5	43451.9	72140.5
evm.model.Chr3.661_T292	RVASHIHRQDTVDCLKTFNAR	evm.model.Chr3.661	QDtVDCLK	1	0	1	1	0	1	1	27211.4	28068.9	22177.6	54980.9	27015.5	39597.9
evm.model.Chr3.661_T339	ESNKEPQAQSTVVRANTAIAK	evm.model.Chr3.661	EPQAQStVVR;ESNKEPQAQStVVR	0.971	0.947	0.924	0.922	0.93	0.971	0.965	410601	370668	388975	399762	501384	483214
evm.model.Chr3.671_S39	KREHSMINQVSLADKNLSGNP	evm.model.Chr3.671	EHSMINQVsLADK	0.96	0	0	0.96	0	0	0	0	0	15185.9	0	0	0
evm.model.Chr3.671_S71	STYVSTGIAHSPSQSPPSKKT	evm.model.Chr3.671	GNQSTYVSTGIAHsPSQSPPSK;GNQSTYVSTGIAHsPSQSPPSKK;GNQSTYVSTGIAHsPSQsPPSK	0.951	0.951	0	0.89	0	0	0	205842	94294	226008	0	21342.2	0
evm.model.Chr3.671_S75	STGIAHSPSQSPPSKKTPSVE	evm.model.Chr3.671	GNQSTYVSTGIAHSPSQsPPSKK;GNQSTYVSTGIAHsPSQsPPSK	0.89	0.888	0	0.89	0	0	0	54766.4	50261.1	97684.4	0	21342.2	0
evm.model.Chr3.671_S78	IAHSPSQSPPSKKTPSVEQLT	evm.model.Chr3.671	GNQSTYVSTGIAHSPSQSPPsK	0.763	0	0.763	0	0	0	0	0	79607.3	0	0	0	0
evm.model.Chr3.671_T122	PEPSETPQADTPEAKMFKVVQ	evm.model.Chr3.671	LPEPSETPQADtPEAK	0.967	0.967	0.966	0.965	0.966	0	0.966	83973.6	72990.4	70605.9	60287	50367.5	43967.6
evm.model.Chr3.684_S141	EVLDSECGTTSPLPKRRRKST	evm.model.Chr3.684	EEVLDSECGTTsPLPK	0.945	0.945	0	0	0	0	0	10509.6	0	0	0	0	0
evm.model.Chr3.686_T227	KKDLKRMGLKTDWRRTFYTTD	evm.model.Chr3.686	MGLKtDWR	1	0	1	0	0	0	0	0	27459.2	0	0	0	0
evm.model.Chr3.698_S2801	PLSRTPRAPFSPLAGAKGTPA	evm.model.Chr3.698	APFsPLAGAK	1	1	1	1	1	1	1	73122.5	66799.3	81284.4	81534.8	78885.7	80819.3
evm.model.Chr3.698_S2916	FLAKDISVIVSPTAGKQKKKK	evm.model.Chr3.698	DISVIVsPTAGK	0.969	0.966	0.959	0.967	0.969	0.964	0.962	84046.2	68171.8	97835.1	37989.3	51656.8	72222.6
evm.model.Chr3.698_T2774	RNAENFATPRTPSSAQQTVNR	evm.model.Chr3.698	tPSSAQQTVNR	0.967	0	0.967	0	0.965	0.906	0.953	0	21574	19814.8	0	29050.4	29111.6
evm.model.Chr3.708_S1070	KQSETEEEQPSDGEDKSTSQP	evm.model.Chr3.708	QSETEEEQPsDGEDK	0.973	0.968	0.97	0.968	0.973	0.973	0.972	143422	140349	129957	119906	120512	97769.3
evm.model.Chr3.708_S1082	GEDKSTSQPESSTEDQDDAED	evm.model.Chr3.708	STSQPEsSTEDQDDAEDETEEK	0.948	0.327	0.948	0.48	0	0	0	71775.3	62659.5	74276.1	0	0	0
evm.model.Chr3.708_S1214	ENNQVEEDKESTDLQQKEEEL	evm.model.Chr3.708	STEEQSPVENNQVEEDKEsTDLQQK	0.948	0.948	0.49	0.49	0	0	0	20816.1	12481.3	22860.7	0	0	0
evm.model.Chr3.708_S1446	LELRYLRTSASVPSTPSTSND	evm.model.Chr3.708	TSAsVPSTPSTSNDASR;TSAsVPStPSTSNDASR;TSAsVPsTPSTSNDASR	0.969	0.966	0.964	0.951	0.969	0.963	0.969	438328	377261	344244	271836	277337	312840
evm.model.Chr3.708_S1449	RYLRTSASVPSTPSTSNDASR	evm.model.Chr3.708	TSAsVPsTPSTSNDASR	0.959	0	0.959	0	0	0	0.555	73840.2	24307.3	0	52049.5	0	44452
evm.model.Chr3.708_S1452	RTSASVPSTPSTSNDASRSDK	evm.model.Chr3.708	TSASVPSTPsTSNDASR	0.95	0.949	0.324	0.941	0.247	0.95	0.948	44954	41675.5	30029	31657.7	33445.9	38842.3
evm.model.Chr3.708_S1568	LRQATVANRNSPKKKKLDSGA	evm.model.Chr3.708	QATVANRNsPK	0.972	0.945	0.962	0.93	0.937	0.972	0.904	0	99037.9	136674	70738.9	0	54536.7
evm.model.Chr3.708_S1576	RNSPKKKKLDSGASMPSASKV	evm.model.Chr3.708	KLDsGASMPSASK;KLDsGAsMPSASK	0.962	0	0.962	0.914	0	0	0	118261	70759.1	114286	33203.8	0	0
evm.model.Chr3.708_S1579	PKKKKLDSGASMPSASKVSSA	evm.model.Chr3.708	KLDsGAsMPSASK	0.913	0	0	0.913	0	0	0	39281.9	36958.8	12077.1	33203.8	0	0
evm.model.Chr3.708_S1989	NAAHEAGTAGSLPRSPSNYST	evm.model.Chr3.708	AELNAAHEAGTAGsLPR	0.962	0	0	0.962	0	0	0	0	43733.3	79378.5	0	0	0
evm.model.Chr3.708_S2147	GCGLPQARRISLASPRQLLKS	evm.model.Chr3.708	RIsLASPR	0.966	0.966	0.96	0	0	0	0	40111.7	30362.2	0	0	0	28888.2
evm.model.Chr3.708_S2150	LPQARRISLASPRQLLKSSNM	evm.model.Chr3.708	ISLAsPR	0.962	0.889	0	0.962	0	0	0.896	21370.6	0	16302.7	0	0	0
evm.model.Chr3.708_T1450	YLRTSASVPSTPSTSNDASRS	evm.model.Chr3.708	TSASVPStPSTSNDASR;TSAsVPStPSTSNDASR	0.969	0.873	0.94	0.95	0.968	0.969	0.963	138441	123694	133854	31545.7	109710	107981
evm.model.Chr3.723.1_S118	ADKPSMAEVGSFDKNKLNTTE	evm.model.Chr3.723.1	PSMAEVGsFDK;PSMAEVGsFDKNK	0.971	0.97	0.969	0.968	0.971	0.971	0.97	344199	336252	341563	345575	404005	397392
evm.model.Chr3.723.1_S156	SRNEAAHFDQSKMKHVETVEK	evm.model.Chr3.723.1	NEAAHFDQsK	1	1	0	1	1	1	0	10553.3	0	23545.4	31225.1	33449.5	0
evm.model.Chr3.723.1_S184	LREKMAGQVASVSKESLKHVE	evm.model.Chr3.723.1	MAGQVAsVSK	0.962	0.5	0.5	0	0	0.962	0	144290	0	122575	174456	197458	0
evm.model.Chr3.723.1_S186	EKMAGQVASVSKESLKHVETK	evm.model.Chr3.723.1	MAGQVASVsK;MAGQVASVsKESLK;MAGQVASVsKEsLK;MAGQVASVsKEsLKHVETK	0.972	0.969	0.971	0.967	0.972	0.972	0.97	1.06419e+06	1.05981e+06	1.04742e+06	874438	989195	1028292
evm.model.Chr3.723.1_S189	AGQVASVSKESLKHVETKEKN	evm.model.Chr3.723.1	MAGQVASVSKEsLK;MAGQVASVsKEsLK;MAGQVASVsKEsLKHVETK	0.972	0.969	0.971	0.967	0.972	0.972	0.97	980174	1.16135e+06	958306	909405	987660	959516
evm.model.Chr3.723.1_S203	VETKEKNPLPSGTDIAIEKAP	evm.model.Chr3.723.1	EKNPLPsGTDIAIEK;NPLPsGTDIAIEK	0.964	0.964	0	0.964	0	0	0	34177.6	0	69039.8	0	0	0
evm.model.Chr3.723.1_S23	EGGKNKKKPESESEPSPSDSS	evm.model.Chr3.723.1	KKPEsESEPSPSDSSK;KKPEsESEPsPSDSSK;KPEsESEPSPSDSSK;KPEsESEPSPSDSSKEK;KPEsESEPSPSDSsKEK;KPEsESEPsPSDSSK;KPEsEsEPSPSDSSK	0.969	0.764	0.969	0.964	0.769	0.958	0.939	3.57028e+06	3865790	3.23918e+06	2.47558e+06	1678867	2.05204e+06
evm.model.Chr3.723.1_S25	GKNKKKPESESEPSPSDSSKE	evm.model.Chr3.723.1	KPESEsEPSPSDsSKEK;KPEsEsEPSPSDSSK	0.944	0	0.944	0.907	0.397	0	0	217427	230740	353328	255364	0	210914
evm.model.Chr3.723.1_S257	IKSIPLFKRDSLNKIDTQEKN	evm.model.Chr3.723.1	DsLNKIDTQEK;RDsLNKIDTQEK	0.97	0.919	0.968	0.966	0.968	0.97	0.968	113781	114080	82356.9	30367.2	29860.6	24987.5
evm.model.Chr3.723.1_S28	KKKPESESEPSPSDSSKEKEQ	evm.model.Chr3.723.1	KKPESESEPsPSDSSK;KKPEsESEPsPSDSSK;KPESESEPsPSDSSK;KPEsESEPsPSDSSK	0.964	0.782	0.964	0.955	0.935	0.96	0.94	482423	753240	699687	364530	434914	380773
evm.model.Chr3.723.1_S30	KPESESEPSPSDSSKEKEQVE	evm.model.Chr3.723.1	KKPESESEPSPsDSSK	0.936	0.936	0.328	0	0	0.326	0	122709	153424	213934	0	0	0
evm.model.Chr3.723.1_S32	ESESEPSPSDSSKEKEQVEEK	evm.model.Chr3.723.1	KKPESESEPSPSDsSK;KPESESEPSPSDsSKEK;KPESEsEPSPSDsSKEK	0.925	0.27	0.481	0.9	0.485	0.925	0.487	660094	655603	489208	453789	445125	404686
evm.model.Chr3.723.1_S33	SESEPSPSDSSKEKEQVEEKQ	evm.model.Chr3.723.1	KPESESEPSPSDSsKEK;KPEsESEPSPSDSsKEK	0.965	0.964	0.964	0.965	0	0.923	0	877995	663711	867745	0	355370	0
evm.model.Chr3.723.1_T167	KMKHVETVEKTSVKDDYLREK	evm.model.Chr3.723.1	tSVKDDYLR	0.866	0.439	0	0.48	0.473	0.464	0.866	302364	250114	256386	329663	250825	283030
evm.model.Chr3.735_S72	PTQQEIDQEKSNEF*******	evm.model.Chr3.735	LPTQQEIDQEKsNEF	0.968	0.966	0.968	0.967	0	0	0	85751	43228.9	170016	0	7807.04	0
evm.model.Chr3.736_S236	GRLMEMHGEGSAKSSSTKTDT	evm.model.Chr3.736	LMEMHGEGsAK	1	0	0	0	1	0	1	249819	247038	208377	68823.6	149917	162234
evm.model.Chr3.736_S256	TGSKVERTGDSYEPPVQDSV*	evm.model.Chr3.736	TGDsYEPPVQDSV	0.892	0	0.489	0	0.488	0.892	0	454463	594417	690597	360089	397226	521232
evm.model.Chr3.736_S264	GDSYEPPVQDSV*********	evm.model.Chr3.736	TGDSYEPPVQDsV	0.969	0.961	0.965	0.96	0.969	0.965	0.966	3.16035e+06	3.59658e+06	3.4083e+06	3.28927e+06	3.74973e+06	4.90047e+06
evm.model.Chr3.736_T253	KTDTGSKVERTGDSYEPPVQD	evm.model.Chr3.736	tGDSYEPPVQDSV	0.953	0.953	0.332	0.487	0.331	0	0.332	461417	543660	658812	441276	0	518896
evm.model.Chr3.746_S179	VEVQEIPQQESPEIVKDDSSP	evm.model.Chr3.746	EDKEVEVQEIPQQEsPEIVK;EVEVQEIPQQEsPEIVK	1	1	1	1	1	1	1	210956	129063	451774	0	42792.2	54873.9
evm.model.Chr3.762_S168	LKPGEEPTDYSDFSEAETDKE	evm.model.Chr3.762	LLKPGEEPTDYsDFSEAETDK;LLKPGEEPTDYsDFSEAETDKEK;LLKPGEEPTDYsDFSEAEtDKEK;LLKPGEEPTDYsDFsEAETDK;LLKPGEEPTDYsDFsEAETDKEK;LLKPGEEPTDYsDFsEAEtDKEK;LLKPGEEPTDysDFSEAEtDKEK	0.962	0.955	0.962	0.962	0	0	0	852818	222501	2.93725e+06	0	0	0
evm.model.Chr3.762_S171	GEEPTDYSDFSEAETDKEKSK	evm.model.Chr3.762	LLKPGEEPTDYSDFsEAETDK;LLKPGEEPTDYSDFsEAETDKEK;LLKPGEEPTDYSDFsEAEtDK;LLKPGEEPTDYSDFsEAEtDKEK;LLKPGEEPTDYsDFsEAETDK;LLKPGEEPTDYsDFsEAETDKEK;LLKPGEEPTDYsDFsEAEtDKEK	0.965	0.955	0.962	0.965	0	0	0	855183	359723	3343613	0	0	0
evm.model.Chr3.762_T175	TDYSDFSEAETDKEKSKDD**	evm.model.Chr3.762	LLKPGEEPTDYSDFSEAEtDKEK;LLKPGEEPTDYSDFsEAEtDK;LLKPGEEPTDYSDFsEAEtDKEK;LLKPGEEPTDYsDFSEAEtDKEK;LLKPGEEPTDYsDFsEAEtDKEK;LLKPGEEPTDysDFSEAEtDKEK	0.96	0	0.928	0.96	0	0	0	0	208847	1.76322e+06	0	0	0
evm.model.Chr3.762_Y167	LLKPGEEPTDYSDFSEAETDK	evm.model.Chr3.762	LLKPGEEPTDysDFSEAEtDKEK	0.774	0	0	0.774	0	0	0	0	0	358034	0	0	0
[truncated: 1,608 more rows]
