# Supplementary material for: Quantitative Phosphoproteomics Reveals the Requirement of DYRK1-Mediated Phosphorylation of Ion Transport- and Cell Junction-Related Proteins for Notochord Lumenogenesis in Ascidian
Source: Cells. 2023 Mar 16;12(6):921. doi: 10.3390/cells12060921 (PMC10047359; doi:10.3390/cells12060921)
Supplement: Supplementary file 1 [file cells-12-00921-s001.zip › Supplementary Table S5 Primers used in this study.xlsx]

## Sheet: Sheet1
primer name	sequence
Cs-SLC12-F	TTATATCATATTTATCGGATCCATGGCAGCACAAGTGTTGGGAAGC
Cs-SLC12-R	ATGGTGGCGACCGGTGGATCCggGGAGTAGATGGTGATAACCTCTCTT
Cs-SLC12-S975A-F	CGCCGAATAAAACCGCGGCAGAGACCGACCAATACACCACCGAAGCGCCCCGAGTGG
Cs-SLC12-S975A-R	CCACTCGGGGCGCTTCGGTGGTGTATTGGTCGGTCTCTGCCGCGGTTTTATTCGGCG
Cs-SLC28-F	TTATATCATATTTATCGGATCCATGAGCTTAAAGCGACCACGAAACCATTCCG
Cs-SLC28-R	ATGGTGGCGACCGGTGGATCCggTACACAAGTGTTCACACAGTCTAAG
Cs-SLC28-S110A-F	GCCCTCATCCGATGCAGCAACTATTGAAATGAACACG
Cs-SLC28-S110A-R	CGTGTTCATTTCAATAGTTGCTGCATCGGATGAGGGC
Cr-ZO1-F	TTATATCATATTTATCGGATCCATGGATGAGCTAATATGGCAGGAGC
Cr-ZO1-S116A-R	CATCCAAGTCACGCGCACGACTTCTACTC
Cr-ZO1-S116A-F	GAGTAGAAGTCGTGCGCGTGACTTGGATG
Cr-ZO1-S703A-R	GGGAACATGTTTGACGCGACACCTATTG
Cr-ZO1-S703A-F	CAATAGGTGTCGCGTCAAACATGTTCCC
Cr-ZO1-R	ATGGTGGCGACCGGTGGATCCggGAAATGGTCGATAAGAACAG
Cr-RAB10-F	TTATATCATATTTATCGGATCCATGGCAAAAAAGACTTACGATTTGC
Cr-RAB10-R	ATGGTGGCGACCGGTGGATCCggATAGTTAGAACAGCAAGAACGGG
Cr-RAB10-T174A-F	TTACATAAGGCGCCAGTGAAGGAGAC
Cr-RAB10-T174A-R	GTCTCCTTCACTGGCGCCTTATGTAA
Cr- RAB8B-F	TTATATCATATTTATCGGATCCATGGCGGCCAGCGGTGGGAAAACG
Cr- RAB8B-R	ATGGTGGCGACCGGTGGATCCggTCTTTTAACGTCAGAAGATGCATGC
Cr- RAB8B-S116A-R	ATGGTGGCGACCGGTGGATCCggTCTTTTAACGTCAGCAGATGCATGC
